# Supplementary material for: Quantitative analysis of Mycobacterium avium subsp. hominissuis proteome in response to antibiotics and during exposure to different environmental conditions
Source: Clin Proteomics. 2019 Nov 13;16:39. doi: 10.1186/s12014-019-9260-2 (PMC6852889; doi:10.1186/s12014-019-9260-2)
Supplement: Supplementary file 1 — Additional file 1. MAH proteins obtained by the quantitative TMT mass spectrometric sequencing for each condition and antimicrobial is attached as the XLSX file. [file 12014_2019_9260_MOESM1_ESM.xlsx]

## Sheet: Master_Allreps
ProteinID	Aerobic M. avium at 24h no drug R1	Aerobic M. avium at 24h no drug R2	Aerobic M. avium at 24h exposed to amikacin 4mg/ml R1	Aerobic M. avium at 24h exposed to amikacin 4mg/ml R2	Aerobic M. avium at 24h exposed to clarithromycin 16mg/ml R1	Aerobic M. avium at 24h exposed to clarithromycin 16mg/ml R2	Anaerobic M. avium at 24h no drug R1	Anaerobic M. avium at 24h no drug R2	Anaerobic M. avium at 24h exposed to amikacin 4mg/ml R1	Anaerobic M. avium at 24h exposed to amikacin 4mg/ml R2	Anaerobic M. avium at 24h exposed to clarithromycin 16mg/ml R1	Anaerobic M. avium at 24h exposed to clarithromycin 16mg/ml R2	Biofilm M. avium at 24h no drug R1	Biofilm M. avium at 24h no drug R2	Biofilm M. avium exposed to amikacin 4mg/ml R1	Biofilm M. avium exposed to amikacin 4mg/ml R2	Biofilm M. avium exposed to clarithromycin 16mg/ml R1	Biofilm M. avium exposed to clarithromycin 16mg/ml R2	Aerobic M. avium at 24h no drug	Aerobic M. avium at 24h exposed to amikacin 4mg/ml	Aerobic M. avium at 24h exposed to clarithromycin 16mg/ml	Anaerobic M. avium at 24h no drug	Anaerobic M. avium at 24h exposed to amikacin 4mg/ml	Anaerobic M. avium at 24h exposed to clarithromycin 16mg/ml	Biofilm M. avium at 24h no drug	Biofilm M. avium exposed to amikacin 4mg/ml	Biofilm M. avium exposed to clarithromycin 16mg/ml
A0A0H2ZQF4	1480.72	1622.82	1071.37	748.845	467.202	581.69	568.797	759.164	568.956	817.072	572.239	762.847	820.743	628.532	792.8	504.325	796.193	847.484	1551.77	910.109	524.446	663.98	693.014	667.543	724.637	648.562	821.839
A0A0H2ZQF9	959.71	820.59	1056.5	930.571	629.084	577.849	934.883	787.844	862.144	905.054	827.237	801.662	602.74	731.675	658.508	678.018	598.623	900.582	890.15	993.535	603.467	861.363	883.599	814.449	667.208	668.263	749.603
A0A0H2ZQG5	342.209	399.305	258.955	395.699	314.656	102.425	366.828	1060.79	844.877	681.787	665.875	729.064	1326.12	1369.92	1216.88	1279.34	1252.08	670.937	370.757	327.327	208.54	713.809	763.332	697.469	1348.02	1248.11	961.509
A0A0H2ZQG6	624.713	695.904	747.908	765.704	986.733	990.346	673.173	823.948	746.497	812.244	730.238	973.204	792.591	816.457	827.724	712.314	828.703	525.738	660.308	756.806	988.539	748.561	779.37	851.721	804.524	770.019	677.22
A0A0H2ZQG9	530.792	504.257	722.849	628.03	856.82	680.685	811.692	592.11	816.923	674.23	651.613	722.07	877.26	630.495	817.558	661.989	859.235	2001.33	517.525	675.44	768.753	701.901	745.577	686.842	753.878	739.773	1430.28
A0A0H2ZQH0	1342.48	766.558	525.608	384.227	710.616	450.948	562.598	609.455	715.828	472.312	1158.71	588.177	777.087	872.328	602.814	1921.18	565.461	492.178	1054.52	454.918	580.782	586.027	594.07	873.442	824.708	1262	528.82
A0A0H2ZQH3	626.166	848.525	532.324	921.417	591.78	846.735	501.45	823.908	667.185	633.239	678.33	749.994	1124.39	850.605	1074.51	918.414	1000.17	419.325	737.345	726.87	719.257	662.679	650.212	714.162	987.496	996.462	709.749
A0A0H2ZQH4	693.867	1427.17	973.575	1177.41	708.627	1181.55	687.655	660.361	672.19	1381.29	555.023	628.201	909.07	437.587	893.849	217.269	906.86	393.342	1060.52	1075.49	945.088	674.008	1026.74	591.612	673.329	555.559	650.101
A0A0H2ZQH6	1145.27	1495.22	1563.99	1557.71	570.777	472.259	590.774	488.212	654.936	734.582	628.705	633.642	655.328	480.178	759.88	517.433	663.23	885.483	1320.24	1560.85	521.518	539.493	694.759	631.173	567.753	638.656	774.357
A0A0H2ZQI0	1724.03	935.308	2072.56	1194.95	438.577	507.983	1145.49	1786.9	1119.63	1787.89	561.478	696.036	177.057	196.51	210.517	225.74	197.368	250.2	1329.67	1633.76	473.28	1466.19	1453.76	628.757	186.784	218.129	223.784
A0A0H2ZQI5	823.116	601.95	542.945	690.973	844.603	779.131	695.837	793.472	732.645	801.065	690.057	816.997	804.254	946.67	836.519	803.507	954.64	789	712.533	616.959	811.867	744.654	766.855	753.527	875.462	820.013	871.82
A0A0H2ZQI6	1495.9	1377.88	1148.16	874.915	875.206	747.307	925.226	783.502	816.388	700.284	817.974	721.203	413.186	589.574	414.43	591.693	404.506	842.731	1436.89	1011.54	811.257	854.364	758.336	769.588	501.38	503.061	623.619
A0A0H2ZQI8	888.842	720.472	738.502	671.696	813.934	741.553	745.119	684.883	704.572	650.332	681.699	656.627	829.237	804.142	815.312	812.889	787.795	1285.54	804.657	705.099	777.743	715.001	677.452	669.163	816.69	814.1	1036.67
A0A0H2ZQJ4	286.506	414.621	287.563	272.933	253.418	321.698	920.396	1270.03	1192.65	1174.85	1282.36	1210.41	875.675	803.301	790.678	1027.12	792.807	503.236	350.564	280.248	287.558	1095.21	1183.75	1246.39	839.488	908.897	648.022
A0A0H2ZQJ7	807.654	661.419	1009.39	792.818	798.501	778.989	817.069	689.823	770.73	730.096	738.681	735.112	707.447	691.07	692.963	668.096	731.759	1369.03	734.537	901.103	788.745	753.446	750.413	736.896	699.259	680.529	1050.39
A0A0H2ZQJ8	694.008	820.413	895.772	699.102	793.867	819.093	867.378	864.869	812.106	963.968	795.984	911.651	732.502	693.462	702.648	668.181	730.909	732.321	757.21	797.437	806.48	866.123	888.037	853.818	712.982	685.414	731.615
A0A0H2ZQK2	1162.09	929.701	1345.65	1079.2	559.712	598.996	662.9	678.235	665.653	735.868	625.491	684.255	714.482	703.152	720.153	670.174	726.141	1047.48	1045.89	1212.42	579.354	670.568	700.761	654.873	708.817	695.164	886.811
A0A0H2ZQK5	337.092	349.873	727.181	388.966	797.383	673.623	802.275	679.097	793.516	693.1	793.258	682.713	826.103	746.682	876.874	725.295	926.611	2096.52	343.483	558.074	735.503	740.686	743.308	737.986	786.393	801.084	1511.57
A0A0H2ZQK9	801.701	751.916	729.799	762.966	734.777	723.149	924.967	728.37	761.288	762.784	791.611	659.273	682.383	883.857	804.651	831.622	777.565	918.894	776.808	746.382	728.963	826.669	762.036	725.442	783.12	818.136	848.23
A0A0H2ZQL2	957.66	741.18	699.135	850.707	652.985	804.801	526.801	785.573	584.15	786.252	793.584	801.318	869.103	903.373	844.939	794.659	983.806	581.319	849.42	774.921	728.893	656.187	685.201	797.451	886.238	819.799	782.562
A0A0H2ZQL3	696.913	886.052	603.243	919.467	585.581	485.49	572.499	868.73	625.224	466.572	835.391	482.2	1003.42	862.788	1050.44	1454.71	868.117	340.327	791.483	761.355	535.535	720.614	545.898	658.795	933.102	1252.57	604.222
A0A0H2ZQL6	1202.13	1147.41	1210.2	1177.62	829.702	847.224	810.933	804.685	829.947	918.061	813.091	859.887	484.424	521.302	542.856	495.58	509.021	529.323	1174.77	1193.91	838.463	807.809	874.004	836.489	502.863	519.218	519.172
A0A0H2ZQM0	822.086	921.026	975.976	892.136	713.493	721.383	897.85	763.013	883.751	759.15	823.394	737.166	647.97	762.211	643.288	828.996	668.638	685.158	871.556	934.056	717.438	830.431	821.451	780.28	705.09	736.142	676.898
A0A0H2ZQM3	645.14	362.336	667.242	414.857	1007.27	737.304	929.383	706.211	840.55	698.166	906.786	697.581	694.682	515.143	708.125	552.695	599.702	2472.64	503.738	541.049	872.287	817.797	769.358	802.183	604.913	630.41	1536.17
A0A0H2ZQM4	2498.87	2621.17	1970.83	1613.24	493.972	482.546	538.349	498.644	476.074	502.217	472.043	494.213	389.154	393.714	422.082	405.855	371.353	381.782	2560.02	1792.03	488.259	518.496	489.146	483.128	391.434	413.968	376.567
A0A0H2ZQM8	866.623	874.133	917.143	796.21	1107.63	1038.56	480.927	454.413	503.029	473.844	523.695	484.108	862.137	860.88	886.573	830.966	886.543	1193.44	870.378	856.676	1073.09	467.67	488.436	503.902	861.509	858.769	1039.99
A0A0H2ZQN1	674.225	664.094	702.574	631.432	787.718	732.777	785.773	731.552	844.044	797.366	828.631	730.697	722.659	788.679	767.791	742.646	834.58	1253.28	669.16	667.003	760.248	758.662	820.705	779.664	755.669	755.219	1043.93
A0A0H2ZQN2	666.401	760.405	802.004	762.635	668.854	716.194	726.977	769.923	727.279	715.096	669.911	710.763	930.491	823.966	844.696	889.05	904.09	865.374	713.403	782.32	692.524	748.45	721.188	690.337	877.228	866.873	884.732
A0A0H2ZQN4	1149.09	631.16	915.789	834.135	725.301	591.204	840.448	625.423	701.097	671.276	755.022	647.069	699.338	572.031	725.666	674.476	610.587	1864.04	890.126	874.962	658.253	732.936	686.187	701.045	635.685	700.071	1237.31
A0A0H2ZQN5	693.105	595.894	524.406	694.214	436.34	606.723	401.978	700.388	557.287	645.623	705.671	756.658	1188.63	1010.86	1081.59	1039.31	1155.28	835.143	644.499	609.31	521.532	551.183	601.455	731.165	1099.75	1060.45	995.21
A0A0H2ZQN8	608.86	758.785	620.466	698.499	1005.96	1028.79	788.589	875.918	910.047	973.506	789.623	966.173	712.25	763.145	719.763	734.634	795.941	347.332	683.822	659.482	1017.37	832.254	941.777	877.898	737.698	727.198	571.637
A0A0H2ZQP2	610.6	645.458	689.871	614.261	816.879	760.994	799.583	744.511	811.916	768.015	757.748	738.196	760.668	883.976	843.11	861.557	852.443	989.588	628.029	652.066	788.936	772.047	789.965	747.972	822.322	852.334	921.015
A0A0H2ZQP8	752.078	703.67	938.926	811.082	693.238	749.411	752.595	803.641	808.096	821.931	709.512	882.84	766.346	740.744	791.389	752.18	805.747	833.214	727.874	875.004	721.324	778.118	815.013	796.176	753.545	771.784	819.481
A0A0H2ZQP9	695.291	750.871	1072.06	971.936	842.536	712.932	846.21	682.852	815.574	783.989	710.275	831.249	679.267	581.398	685.902	593.035	737.328	1273.51	723.081	1022	777.734	764.531	799.781	770.762	630.332	639.469	1005.42
A0A0H2ZQQ3	798.457	941.018	577.176	509.554	1029.84	551.551	1013.9	683.247	1029.27	453.496	1032.51	458.891	612.139	992.306	528.5	1143.64	414.226	1107.94	869.738	543.365	790.695	848.572	741.381	745.699	802.223	836.068	761.084
A0A0H2ZQQ6	928.005	966.991	919.386	1118.13	784.698	801.841	557.339	761.226	669.586	639.389	708.101	728.149	737.166	807.199	844.921	776.449	867.571	480.778	947.498	1018.76	793.27	659.282	654.487	718.125	772.183	810.685	674.174
A0A0H2ZQQ9	531.42	794.115	731.952	826.628	850.285	1035.47	516.374	979.7	732.452	963.626	618.485	942.872	909.268	798.655	952.263	567.609	1036.73	302.811	662.767	779.29	942.88	748.037	848.039	780.678	853.962	759.936	669.771
A0A0H2ZQR3	702.885	1024.43	810.994	764.943	794.269	782.896	797.661	757.335	740.449	754.857	826.719	716.612	828.177	899.001	764.894	832.028	717.187	517.735	863.659	787.968	788.582	777.498	747.653	771.666	863.589	798.461	617.461
A0A0H2ZQS0	615.126	678.426	686.136	674.913	797.451	805.836	836.214	822.646	820.031	827.726	874.875	786.344	757.007	742.641	771.611	734.697	780.315	1029.92	646.776	680.525	801.643	829.43	823.878	830.609	749.824	753.154	905.118
A0A0H2ZQS1	860.202	1011.78	905.711	899.222	865.809	869.423	795.954	839.041	888.337	883.338	682.139	921.288	680.706	577.836	675.336	576.089	722.487	666.583	935.991	902.466	867.616	817.498	885.838	801.714	629.271	625.713	694.535
A0A0H2ZQS4	703.224	691.388	661.681	739.253	900.843	821.062	865.355	743.497	804.764	737.722	792.279	762.882	774.551	821.981	730.342	871.324	744.526	834.634	697.306	700.467	860.953	804.426	771.243	777.581	798.266	800.833	789.58
A0A0H2ZQS5	867.076	920.565	701.629	931.914	587.851	822.397	862.671	819.695	581.653	774.295	768.437	925.528	937.424	660.372	892.988	723.845	766.753	570.424	893.821	816.772	705.124	841.183	677.974	846.983	798.898	808.417	668.588
A0A0H2ZQT0	907.65	886.856	1027.44	1019.58	801.424	879.273	822.785	800.582	837.962	877.016	748.267	823.593	633.78	672.748	660.334	605.045	672.015	635.352	897.253	1023.51	840.349	811.684	857.489	785.93	653.264	632.69	653.684
A0A0H2ZQT4	643.789	495.748	748.055	651.395	735.597	711.36	751.631	683.699	670.343	724.346	743.024	710.825	884.556	912.732	882.738	871.084	872.184	1210.55	569.769	699.725	723.479	717.665	697.344	726.925	898.644	876.911	1041.37
A0A0H2ZQT6	1710.52	1923.59	1323.84	1194.74	742.732	795.304	465.357	549.35	493.094	610.751	497.179	567.628	676.931	610.691	703.666	552.952	674.437	460.536	1817.06	1259.29	769.018	507.353	551.923	532.403	643.811	628.309	567.487
A0A0H2ZQU0	654.838	1129.63	660.379	619.828	617.659	938.776	525.785	834.758	558.485	636.821	614.54	840.353	1031.75	973.049	1050.54	672.761	1124.46	459.87	892.235	640.103	778.217	680.271	597.653	727.447	1002.4	861.649	792.163
A0A0H2ZQU1	767.239	697.265	899.021	904.058	757.259	775.371	690.728	647.56	732.193	722.721	700.397	680.237	815.56	798.449	822.104	800.134	817.421	1019.13	732.252	901.539	766.315	669.144	727.457	690.317	807.004	811.119	918.273
A0A0H2ZQU3	441.834	378.912	410.228	456.658	524.348	514.375	629.438	633.666	773.906	475.676	634.901	548.378	1120.45	796.593	1025.83	709.629	1174.17	2478.76	410.373	433.443	519.361	631.552	624.791	591.64	958.523	867.728	1826.47
A0A0H2ZQU5	702.74	664.362	835.586	880.969	782.272	757.156	720.846	648.181	693.967	687.1	670.311	742.082	837.886	886.536	832.485	762.368	898.319	1004.91	683.551	858.277	769.714	684.513	690.534	706.196	862.211	797.426	951.613
A0A0H2ZQU7	475.109	540.822	462.559	446.241	832.153	867.788	1039.11	900.389	1079.67	1020.64	974.558	1051.33	695.728	671.428	674.907	787.576	672.284	835.017	507.965	454.4	849.971	969.75	1050.16	1012.95	683.578	731.242	753.65
A0A0H2ZQU8	708.298	727.11	821.351	775.335	903.091	879.981	900.918	781.886	868.866	829.906	881.046	806.959	623.662	763.753	677.529	703.207	651.045	851.623	717.704	798.343	891.536	841.402	849.386	844.003	693.708	690.368	751.334
A0A0H2ZQV1	563.142	813.222	1323.54	962.256	556.816	821.073	957.391	880.046	997.115	744.979	649.045	753.558	745.983	785.27	722.045	742.915	613.866	599.199	688.182	1142.9	688.945	918.719	871.047	701.302	765.626	732.48	606.533
A0A0H2ZQV4	1395.32	1050.28	651.288	571.307	1077.85	1527.37	708.116	802.483	855.511	578.263	759.096	829.432	618.767	564.579	581.286	636.086	495.291	670.501	1222.8	611.298	1302.61	755.3	716.887	794.264	591.673	608.686	582.896
A0A0H2ZQV7	759.726	727.565	601.894	863.895	647.13	563.144	487.606	706.504	588.471	404.811	674.009	523.331	932.29	881.3	947.444	1282.63	1194.57	847.456	743.646	732.895	605.137	597.055	496.641	598.67	906.795	1115.03	1021.01
A0A0H2ZQW2	740.904	749.616	894.619	987.197	846.787	780.026	813.369	780.583	791.945	966.061	851.68	934.304	645.934	681.894	721.996	599.466	724.072	713.478	745.26	940.908	813.406	796.976	879.003	892.992	663.914	660.731	718.775
A0A0H2ZQW4	521.443	547.493	382.853	642.005	582.59	969.876	432.703	723.055	551.946	610.768	762.983	737.879	1080.62	1067.15	1080.08	1026.66	1290.59	570.314	534.468	512.429	776.233	577.879	581.357	750.431	1073.89	1053.37	930.451
A0A0H2ZQW5	846.319	679.433	853.677	741.609	269.654	315.101	357.331	362.034	338.159	343.123	363.621	340.407	1392.72	1039.75	1405.79	1080.1	1038.57	1882.18	762.876	797.643	292.377	359.683	340.641	352.014	1216.24	1242.95	1460.38
A0A0H2ZQX0	741.881	594.064	1076.07	639.177	805.682	981.914	983.288	1009.69	935.447	1134.7	797.387	1090.52	670.627	814.473	549.21	605.635	562.972	324.855	667.973	857.625	893.798	996.49	1035.07	943.952	742.55	577.422	443.913
A0A0H2ZQX3	585.914	665.705	883.172	630.992	733.817	619.026	624.756	720.933	597.938	592.786	752.31	756.555	680.529	984.765	1040.4	1263.11	1032.88	575.212	625.81	757.082	676.422	672.845	595.362	754.433	832.647	1151.76	804.045
A0A0H2ZQX5	877.408	689.156	782.157	848.28	976.767	863.612	866.5	721.502	937.561	854.267	879.072	904.391	596.611	593.736	577.297	634.113	577.97	1070.51	783.282	815.218	920.19	794.001	895.914	891.731	595.173	605.705	824.241
A0A0H2ZQX8	694.378	601.946	659.433	672.104	911.191	769.53	892.878	822.461	911.27	929.407	787	845.419	728.318	658.072	712.482	666.587	696.774	1184.31	648.162	665.769	840.361	857.669	920.339	816.21	693.195	689.535	940.541
A0A0H2ZQY0	880.984	687.817	937.893	898.66	814.472	807.539	834.207	725.826	868.353	849.934	641.547	791.379	671.188	708.509	693.623	681.774	749.662	979.738	784.401	918.277	811.005	780.017	859.144	716.463	689.848	687.698	864.7
A0A0H2ZQY1	733.798	761.593	601.718	576.054	932.042	878.028	889.65	937.22	924.076	976.077	903.108	931.841	733.765	671.765	651.812	743.894	612.111	676.733	747.696	588.886	905.035	913.435	950.077	917.475	702.765	697.853	644.422
A0A0H2ZQY5	572.017	685.441	586.7	657.18	923.864	989.236	770.831	869.063	879.442	859.246	867.248	888.819	749.307	769.475	789.189	809.428	775.292	564.798	628.729	621.94	956.55	819.947	869.344	878.033	759.391	799.309	670.045
A0A0H2ZQY9	620.576	583.403	570.61	609.36	771.844	698.609	817.432	733.165	843.9	800.459	826.483	761.937	855.463	768.956	820.103	824.387	779.113	1257.92	601.99	589.985	735.227	775.298	822.179	794.21	812.21	822.245	1018.51
A0A0H2ZQZ2	1192.07	755.127	815.645	877.275	917.144	728.581	1158.01	707.2	997.908	663.703	987.273	698.93	398.346	510.031	402.011	840.569	340.037	1308.33	973.601	846.46	822.863	932.603	830.806	843.102	454.189	621.29	824.186
A0A0H2ZQZ6	1008.57	1356.21	630.903	823.165	641.164	442.798	642.395	566.267	602.335	394.897	581.32	485.143	1081.08	1084.59	896.014	1127.47	863.38	568.07	1182.39	727.034	541.981	604.331	498.616	533.231	1082.83	1011.74	715.725
A0A0H2ZQZ9	395.646	515.428	525.528	705.209	687.208	844.25	565.2	874.824	648.428	817.361	609.126	1077.32	958.133	915.49	1057.65	760.068	1313.37	547.441	455.537	615.369	765.729	720.012	732.894	843.221	936.812	908.861	930.406
A0A0H2ZR00	648.549	639.825	744.395	716.974	679.805	657.357	740.546	782.961	772.152	815.303	762.822	804.685	897.88	830.819	938.085	766.461	753.061	1042.08	644.187	730.685	668.581	761.754	793.727	783.754	864.349	852.273	897.57
A0A0H2ZR03	622.292	696.987	644.833	654.594	1050.13	911.852	862.804	691.698	852.134	715.607	753.717	758.567	739.055	761.813	670.394	771.972	782.928	1109.38	659.639	649.714	980.991	777.251	783.871	756.142	750.434	721.183	946.152
A0A0H2ZR05	619.778	648.797	612.994	624.655	1010.99	916.833	737.107	770.695	843.575	709.936	834.156	684.808	774.375	843.228	734.217	779.424	766.97	1072.15	634.287	618.824	963.911	753.901	776.756	759.482	808.801	756.821	919.56
A0A0H2ZR07	669.815	784.667	555.241	664.684	864.404	851.777	761.824	738.207	757.898	599.12	780.577	672.984	927.505	832.967	862.612	937.216	734.99	906.052	727.241	609.962	858.09	750.015	678.509	726.78	880.236	899.914	820.521
A0A0H2ZR09	645.197	770.331	662.652	753.16	834.365	846.903	772.99	805.057	818.463	850.815	814.735	809.311	786.014	818.58	777.055	765.835	821.624	670.021	707.764	707.906	840.634	789.024	834.639	812.023	802.297	771.445	745.822
A0A0H2ZR13	1041.88	773.429	915.902	687.148	726.773	912.551	806.017	811.593	752.986	910.866	777.638	871.05	647.131	684.043	705.749	624.638	713.876	907.61	907.652	801.525	819.662	808.805	831.926	824.344	665.587	665.193	810.743
A0A0H2ZR17	1188	946.896	871.861	823.593	889.611	789.545	797.369	735.75	782.063	872.009	646.561	858.035	617.444	687.92	663.146	695.822	687.668	745.466	1067.45	847.727	839.578	766.56	827.036	752.298	652.682	679.484	716.567
A0A0H2ZR22	554.333	842.384	1145.48	832.8	830.806	769.28	779.909	662.984	698.156	917.233	535.901	824.104	752.161	821.056	900.579	674.347	868.324	779.838	698.358	989.139	800.043	721.446	807.695	680.003	786.609	787.463	824.081
A0A0H2ZR29	923.093	705.829	1000.76	613.486	675.73	762.964	1101.61	1001.85	686.024	950.077	794.455	965.443	610.309	615.159	737.051	595.906	611.462	998.9	814.461	807.124	719.347	1051.73	818.051	879.949	612.734	666.479	805.181
A0A0H2ZR30	1235.05	1032.24	670.15	712.129	723.953	619.872	546.059	685.915	748.233	569.036	1072.33	619.699	739.143	799.349	600.059	1131.37	645.981	751.165	1133.65	691.139	671.913	615.987	658.634	846.012	769.246	865.714	698.573
A0A0H2ZR33	786.043	842.515	734.003	797.96	966.191	1006.48	897.19	937.299	885.253	1004.52	928.139	1023.14	608.212	609.618	611.29	527.418	617.573	522.908	814.279	765.982	986.335	917.245	944.885	975.639	608.915	569.354	570.241
A0A0H2ZR35	353.326	551.025	346.066	867.173	878.937	693.689	697.49	895.938	873.58	846.146	925.423	959.873	1031.41	885.802	825.846	877.422	828.385	439.796	452.175	606.619	786.313	796.714	859.863	942.648	958.608	851.634	634.09
A0A0H2ZR37	2168.45	1623.62	1413.94	1129.83	364.58	423.114	593.636	625.149	639.004	761.917	499.884	635.693	701.05	737.741	627.643	629.526	398.223	614.386	1896.04	1271.89	393.847	609.392	700.461	567.788	719.396	628.585	506.304
A0A0H2ZR40	1129.01	754.865	792.993	547.514	768.219	989.618	720.502	721.372	870.171	574.15	912.794	582.92	600.764	827.928	588.852	809.717	673.919	1226.17	941.936	670.253	878.919	720.937	722.161	747.857	714.346	699.285	950.046
A0A0H2ZR43	482.21	375.981	589.454	529.239	1248.99	1173.46	744.942	1088.48	1017.51	976.733	1022.14	1254.46	630.564	467.814	592.771	571.003	609.203	828.701	429.096	559.346	1211.22	916.712	997.123	1138.3	549.189	581.887	718.952
A0A0H2ZR46	675.433	685.622	1183.41	692.874	1012.53	826.375	1016.22	1079.86	816.848	1121.88	827.285	969.671	590.813	629.56	529.92	618.399	515.984	602.394	680.527	938.14	919.452	1048.04	969.365	898.478	610.187	574.16	559.189
A0A0H2ZR47	752.34	809.215	719.088	644.333	907.609	849.654	885.949	823.005	846.927	890.024	828.021	860.162	671.123	675.161	702.494	666.282	701.031	947.595	780.778	681.711	878.631	854.477	868.475	844.092	673.142	684.388	824.313
A0A0H2ZR48	823.317	819.011	801.665	729.777	1198.44	1219.22	892.543	815.157	864.484	859.397	883.103	831.994	546.466	617.318	574.584	543.465	518.087	811.231	821.164	765.721	1208.83	853.85	861.941	857.548	581.892	559.025	664.659
A0A0H2ZR52	960.34	900.118	1217.67	1295.36	796.725	730.025	816.515	717.329	779.081	798.519	661.151	676.537	613.673	602.607	627.412	545.491	700.819	947.962	930.229	1256.51	763.375	766.922	788.8	668.844	608.14	586.452	824.39
A0A0H2ZR53	736.218	878.424	804.106	736.179	851.097	1005.68	785.433	962.107	820.851	857.678	798.406	889.326	819.198	654.648	818.689	639.68	580.764	580.621	807.321	770.143	928.386	873.77	839.265	843.866	736.923	729.185	580.692
A0A0H2ZR58	703.375	927.458	736.186	676.992	893.676	969.153	911.07	1096.88	929.578	1073.15	927.402	990.483	588.206	662.979	610.307	566.212	706.693	302.402	815.417	706.589	931.415	1003.98	1001.36	958.943	625.592	588.259	504.547
A0A0H2ZR60	727.826	639.53	546.406	643.756	875.665	824.416	790.831	761.206	848.611	708.449	804.97	702.87	804.53	783.867	718.759	855.509	811.187	1108.18	683.678	595.081	850.04	776.018	778.53	753.92	794.199	787.134	959.681
A0A0H2ZR61	720.971	252.101	571.355	248.635	770.402	446.142	914.213	474.339	783.025	570.955	804.275	509.727	741.16	525.651	899.498	605.487	751.14	3434.76	486.536	409.995	608.272	694.276	676.99	657.001	633.406	752.492	2092.95
A0A0H2ZR65	718.272	563.122	1598.99	939.385	482.264	456.603	617.814	631.484	532.932	869.522	610.729	754.214	739.006	895.678	1088.55	674.888	754.645	1269.69	640.697	1269.19	469.434	624.649	701.227	682.472	817.342	881.719	1012.17
A0A0H2ZR66	618.964	766.388	740.162	713.181	838.972	863.425	819.383	920.92	819.198	953.103	816.297	876.966	776.461	687.175	750.909	619.476	779.495	791.791	692.676	726.671	851.198	870.151	886.151	846.632	731.818	685.192	785.643
A0A0H2ZR69	569.339	673.16	770.868	885.282	440.132	514.549	814.152	756.246	653.629	670.224	502.208	695.609	1210.55	1056.63	1135.02	802.675	818.607	916.037	621.25	828.075	477.341	785.199	661.927	598.909	1133.59	968.85	867.322
A0A0H2ZR71	2549.66	2442.12	1829.25	1993.41	411.078	281.714	573.166	497.736	632.458	533.938	556.105	556.736	326.422	362.504	416.738	409.527	315.148	303.454	2495.89	1911.33	346.396	535.451	583.198	556.421	344.463	413.133	309.301
A0A0H2ZR73	533.766	600.761	577.44	643.072	932.46	883.52	757.022	666.362	691.21	654.796	719.026	688.292	861.904	965.986	886.143	908.283	932.657	947.313	567.264	610.256	907.99	711.692	673.003	703.659	913.945	897.213	939.985
A0A0H2ZR75	1327.4	1220.6	2069.17	1559.22	571.636	622.634	732.446	639.99	657.676	719.229	608.396	655.265	464.224	582.065	545.653	599.886	472.198	609.71	1274	1814.19	597.135	686.218	688.452	631.83	523.145	572.769	540.954
A0A0H2ZR77	793.686	657.735	1107.9	726.843	871.48	904.649	778.763	802.021	802.74	979.063	701.409	894.877	637.705	863.187	717.493	559.208	701.267	779.587	725.71	917.374	888.064	790.392	890.901	798.143	750.446	638.351	740.427
A0A0H2ZR81	833.745	823.068	871.799	765.216	883.935	831.561	840.687	765.58	757.974	727	803.576	752.171	694.49	627.565	700.069	659.151	672.03	1203.93	828.406	818.508	857.748	803.134	742.487	777.874	661.027	679.61	937.979
A0A0H2ZR82	752.658	800.903	907.221	835.433	892.629	923.808	810.617	816.017	758.395	844.354	779.193	804.536	702.088	707.708	739.423	658.212	704.898	771.39	776.78	871.327	908.218	813.317	801.374	791.865	704.898	698.818	738.144
A0A0H2ZR84	699.499	656.025	813.625	828.734	837.422	918.659	848.987	846.632	841.167	931.398	792.438	822.328	704.468	812.223	744.404	708.922	730.62	595.96	677.762	821.179	878.041	847.809	886.283	807.383	758.346	726.663	663.29
A0A0H2ZR85	1357.16	1070.42	4568.63	3810.4	193.685	306.489	449.197	346.091	278.419	336.893	217.333	291.79	268.922	329.365	357.751	295.848	343.91	519.77	1213.79	4189.52	250.087	397.644	307.656	254.561	299.143	326.8	431.84
A0A0H2ZR87	677.646	673.021	624.512	697.62	1122.18	1059.87	931.044	883.056	1004.23	960.221	968.971	973.504	526.016	718.814	566.43	748.956	595.607	429.775	675.334	661.066	1091.02	907.05	982.226	971.237	622.415	657.693	512.691
A0A0H2ZR89	1003.69	870.029	726.615	778.816	1034.33	860.998	784.675	727.879	935.394	772.953	791.843	673.402	619.896	739.325	589.742	862.521	595.749	777.632	936.86	752.715	947.665	756.277	854.173	732.623	679.61	726.131	686.69
A0A0H2ZR91	506.78	563.717	659.486	597.631	824.851	859.097	935.882	776.879	779.471	796.021	667.423	755.099	899.831	886.673	856.95	861.685	812.26	914.409	535.249	628.559	841.974	856.381	787.746	711.261	893.252	859.317	863.335
A0A0H2ZR92	748.215	570.148	589.816	519.661	873.112	712.805	836.618	678.735	894.78	750.435	809.237	749.589	759.494	778.678	733.919	903.776	720.162	1331.94	659.181	554.739	792.958	757.677	822.607	779.413	769.086	818.847	1026.05
A0A0H2ZR95	1211.65	1514.08	1294.51	1057.37	690.051	729.398	720.251	823.69	721.746	854.159	732.888	790.663	616.052	590.299	632.77	487.443	592.484	455.623	1362.86	1175.94	709.724	771.97	787.952	761.775	603.176	560.106	524.053
A0A0H2ZR96	833.043	825.959	851.14	274.644	782.05	403.068	546.783	745.679	604.351	489.45	726.134	435.774	1141.48	836.499	767.14	1867.83	705.652	711.557	829.501	562.892	592.559	646.231	546.9	580.954	988.99	1317.49	708.604
A0A0H2ZRA2	793.59	650.912	583.5	757.199	678.558	718.609	558.19	742.419	747.61	661.068	776.914	754.589	949.132	915.132	847.578	968.62	932.062	780.557	722.251	670.349	698.583	650.304	704.339	765.751	932.132	908.099	856.31
A0A0H2ZRA3	879.034	881.524	1407.25	898.335	1060.38	1035.02	635.493	824.042	740.821	820.189	535.512	1013.75	442.853	501.782	493.325	554.627	1002.12	734.463	880.279	1152.79	1047.7	729.768	780.505	774.63	472.318	523.976	868.289
A0A0H2ZRA6	658.159	569.2	470.617	542.9	590.167	705.086	495	801.554	615.55	679.284	971.86	751.416	1007.43	1013.46	985.046	1118.26	965.222	686.021	613.679	506.758	647.626	648.277	647.417	861.638	1010.45	1051.65	825.621
A0A0H2ZRA7	4690.85	546.093	2090.59	719.853	215.107	526.684	292.228	487.985	176.563	532.642	159.879	498.492	149.679	462.798	157.989	434.477	142.849	2970.7	2618.47	1405.22	370.895	390.106	354.602	329.185	306.238	296.233	1556.78
A0A0H2ZRA9	404.122	474.701	538.319	866.905	437.103	541.531	299.082	839.585	473.254	658.773	489.817	843.786	1429.17	926.553	1177.11	1218.8	1407.04	466.848	439.412	702.612	489.317	569.334	566.013	666.801	1177.86	1197.95	936.944
A0A0H2ZRB2	652.473	579.194	588.057	562.843	758.935	625.244	771.738	592.457	810.899	619.511	771.073	576.096	868.803	784.442	836.337	746.697	846.375	1936.15	615.833	575.45	692.089	682.098	715.205	673.585	826.623	791.517	1391.26
A0A0H2ZRB4	606.935	647.538	587.491	635.159	800.163	863.817	691.62	836.004	781.686	781.601	757.106	835.841	877.238	810.404	908.801	796.12	874.573	857.697	627.237	611.325	831.99	763.812	781.644	796.473	843.821	852.46	866.135
A0A0H2ZRB9	1136.63	1075.41	1240.09	936.101	300.979	392.122	983.992	1188.59	957.507	1218.67	1002.03	1139.45	668.834	570.182	539.953	477.284	348.926	323.208	1106.02	1088.1	346.551	1086.29	1088.09	1070.74	619.508	508.618	336.067
A0A0H2ZRC1	1141.34	780.861	928.477	748.529	742.282	703.948	794.294	688.959	794.008	729.608	689.77	675.429	677.619	627.906	679.052	726.849	676.2	1428.34	961.101	838.503	723.115	741.627	761.808	682.6	652.762	702.95	1052.27
A0A0H2ZRC3	898.02	841.888	923.784	779.414	660.868	826.496	670.874	766.221	695.976	772.171	814.992	807.698	833.67	759.639	765.854	761.855	744.224	782.432	869.954	851.599	743.682	718.548	734.073	811.345	796.654	763.854	763.328
A0A0H2ZRC5	637.945	585.081	602.816	596.238	837.162	831.229	849.988	779.218	845.797	829.192	889.184	796.766	754.833	891.147	760.145	887.393	753.579	809.434	611.513	599.527	834.195	814.603	837.495	842.975	822.99	823.769	781.506
A0A0H2ZRC6	704.42	600.329	543.209	514.473	777.038	722.518	910.849	706.047	902.122	713.687	882.938	696.228	728.555	778.136	789.093	843.952	705.442	1441.84	652.375	528.841	749.778	808.448	807.905	789.583	753.346	816.522	1073.64
A0A0H2ZRD0	762.53	842.094	4174.97	3887.94	279.779	265.061	416.471	296.658	334.27	387.77	321.302	305.398	474.557	439.117	727.831	488.803	320.218	281.784	802.312	4031.46	272.42	356.564	361.02	313.35	456.837	608.317	301.001
A0A0H2ZRD2	731.778	807.357	773.834	788.415	906.901	965.594	976.957	1027.39	935.163	987.86	985.762	964.501	593.121	628.39	602.988	545.675	537.473	542.121	769.568	781.125	936.247	1002.17	961.512	975.132	610.755	574.331	539.797
A0A0H2ZRD6	650.019	844.904	292.992	401.396	532.722	742.114	443.759	918.786	588.021	555.573	910.289	680.718	1032.38	1060.56	1091.04	1262.98	1145.8	352.451	747.462	347.194	637.418	681.272	571.797	795.503	1046.47	1177.01	749.124
A0A0H2ZRD7	650.99	595.705	587.975	604.276	545.975	437.972	705.269	681.101	895.498	187.159	902.699	372.777	983.702	997.679	850.598	1756.16	735.284	913.908	623.347	596.125	491.974	693.185	541.329	637.738	990.691	1303.38	824.596
A0A0H2ZRD9	892.86	726.611	696.467	853.674	495.574	540.034	490.202	648.86	647.21	593.614	734.188	618.796	1037.94	1118.99	860.342	1138.57	1013.21	582.645	809.736	775.071	517.804	569.531	620.412	676.492	1078.46	999.458	797.927
A0A0H2ZRE0	1307.37	1241.52	1757.54	837.215	431.583	491.104	1206.29	1551.81	1112.74	1675.94	835.987	927.511	263.392	272.245	303.543	268.977	237.403	281.37	1274.44	1297.38	461.343	1379.05	1394.34	881.749	267.818	286.26	259.387
A0A0H2ZRE1	1472.7	1159.62	779.696	823.893	513.962	547.329	476.868	654.487	445.144	636.82	434.423	638.944	1060.91	763.327	902.693	687.314	949.446	1194.05	1316.16	801.794	530.646	565.678	540.982	536.683	912.117	795.004	1071.75
A0A0H2ZRE2	646.212	781.744	555.519	821.266	684.411	864.105	567.65	857.299	679.701	707.879	765.817	875.985	984.178	926.965	965.739	793.379	979.06	421.305	713.978	688.393	774.258	712.474	693.79	820.901	955.572	879.559	700.183
A0A0H2ZRE5	896.552	621.76	1293.99	701.797	794.486	774.524	919.294	746.387	582.405	873.654	643.069	872.205	594.752	785.631	873.409	766.659	611.259	935.838	759.156	997.894	784.505	832.84	728.03	757.637	690.192	820.034	773.548
A0A0H2ZRE8	381.348	486.569	534.075	491.299	762.966	771.834	705.187	763.546	706.316	844.601	661.75	889.656	1028.14	1072.46	972.17	851.142	1054.98	798.652	433.959	512.687	767.4	734.367	775.459	775.703	1050.3	911.656	926.816
A0A0H2ZRE9	658.491	601.496	579.695	690.433	740.701	891.092	647.767	776.62	718.184	788.047	858.024	961.308	926.754	914.719	846.822	816.107	882.103	594.591	629.994	635.064	815.896	712.194	753.115	909.666	920.737	831.464	738.347
A0A0H2ZRF6	875.867	595.975	1239.76	1086.96	393.453	365.018	942.311	983.391	1024.66	1198.57	994.392	981.349	598.18	701.496	650.859	731.044	416.986	495.678	735.921	1163.36	379.236	962.851	1111.61	987.87	649.838	690.952	456.332
A0A0H2ZRG0	648.128	632.53	715.408	705.042	738.989	809.717	713.798	743.917	709.952	735.065	738.947	820.582	896.643	923.869	847.251	890.968	906.089	728.321	640.329	710.225	774.353	728.858	722.508	779.764	910.256	869.11	817.205
A0A0H2ZRG6	707.573	730.884	801.637	726.728	920.993	923.846	670.809	683.12	652.179	734.186	680.168	716.071	845.307	779.779	869.263	739.468	831.029	1051.9	719.228	764.183	922.419	676.964	693.183	698.12	812.543	804.366	941.462
A0A0H2ZRG8	793.922	786.784	944.892	852.732	716.407	839.499	707.875	678.826	631.477	634.424	568.895	683.081	861.85	867.238	893.216	833.552	900.166	845.597	790.353	898.812	777.953	693.35	632.95	625.988	864.544	863.384	872.882
A0A0H2ZRH0	1215.88	850.994	1096.58	934.772	768.252	909.416	772.59	860.844	753.165	939.722	798.532	958.319	516.805	590.43	632.797	481.597	625.527	749.022	1033.44	1015.68	838.834	816.717	846.444	878.426	553.618	557.197	687.275
A0A0H2ZRH3	603.24	928.335	547.629	944.409	1094.82	581.196	1052.67	656.061	1041.86	427.865	991.682	569.203	511.577	766.803	588.035	1038.58	572.19	1022.81	765.788	746.019	838.01	854.364	734.861	780.443	639.19	813.306	797.499
A0A0H2ZRH9	756.708	750.607	828.629	765.994	816.284	804.061	742.116	698.343	720.641	767.477	753.347	790.118	777.137	703.392	759.733	803.837	836.322	995.306	753.657	797.312	810.172	720.23	744.059	771.732	740.265	781.785	915.814
A0A0H2ZRI2	545.595	517.388	630.442	580.885	746.094	672.92	828.002	666.173	797.599	757.989	724.249	724.199	881.345	923.751	869.138	895.872	881.575	1222	531.492	605.663	709.507	747.087	777.794	724.224	902.548	882.505	1051.79
A0A0H2ZRI5	827.673	820.683	670.514	559.649	569.577	456.614	685.123	698.041	732.257	434.335	766.783	544.542	989.335	825.873	781.477	1485.49	882.605	910.745	824.178	615.081	513.096	691.582	583.296	655.662	907.604	1133.48	896.675
A0A0H2ZRI7	736.682	599.706	653.791	620.606	896.259	762.359	898.706	767.186	907.7	770.243	872.619	759.617	692.155	784.94	688.05	755.347	650.307	1245.11	668.194	637.198	829.309	832.946	838.971	816.118	738.547	721.698	947.709
A0A0H2ZRJ2	1346.2	953.2	1226.57	984.5	427.988	449.876	1187.09	850.759	975.56	872.724	721.054	696.497	520.911	682.994	482.667	681.869	416.033	970.955	1149.7	1105.54	438.932	1018.92	924.142	708.775	601.953	582.268	693.494
A0A0H2ZRJ3	552.852	707.933	674.867	808.081	992.178	963.788	844.895	899.197	864.66	828.881	831.37	816.007	694.129	741.134	740.746	664.855	764.857	721.29	630.392	741.474	977.983	872.046	846.771	823.689	717.632	702.801	743.074
A0A0H2ZRJ6	1184.06	404.322	773.598	530.717	551.928	553.42	942.237	613.895	703.597	587.262	844.8	394.338	767.62	535.233	797.701	857.602	520.844	2529.24	794.191	652.158	552.674	778.066	645.429	619.569	651.427	827.651	1525.04
A0A0H2ZRJ9	742.601	434.105	769.002	585.366	775.296	738.922	957.055	655.34	764.157	685.865	770.095	684.282	719.781	803.808	753.178	839.627	765.681	1567.54	588.353	677.184	757.109	806.197	725.011	727.189	761.795	796.403	1166.61
A0A0H2ZRK3	716.899	551.096	679.683	624.678	680.718	824.694	687.516	582.263	647.475	784.39	732.004	771.624	890.317	998.954	962.315	967.748	912.861	826.775	633.997	652.18	752.706	634.89	715.932	751.814	944.636	965.032	869.818
A0A0H2ZRK4	867.236	436.59	373.988	323.875	658.57	864.34	360.997	835.003	1281.13	682.565	1181.67	799.48	847.434	849.111	501.743	1200.81	712.395	879.421	651.913	348.931	761.455	598	981.849	990.575	848.273	851.278	795.908
A0A0H2ZRK6	742.744	798.189	717.09	621.355	1183.88	977.113	269.983	280.094	293.705	282.598	274.89	261.953	1286.07	1078.18	1086.17	969.851	1056.15	1587.44	770.467	669.222	1080.5	275.039	288.152	268.422	1182.13	1028.01	1321.8
A0A0H2ZRK8	1039.74	831.654	959.303	716.795	744.36	688.911	819.256	752.285	742.328	813.615	759.75	770.594	658.333	508.776	741.282	674.219	646.831	1416.94	935.696	838.049	716.635	785.771	777.972	765.172	583.555	707.75	1031.88
A0A0H2ZRL0	546.667	629.063	790.627	605.494	867.78	903.466	800.988	809.876	839.295	819.049	772.582	870.448	781.755	696.417	834.398	824.673	736.403	923.343	587.865	698.061	885.623	805.432	829.172	821.515	739.086	829.535	829.873
A0A0H2ZRL3	873.695	673.542	668.342	701.233	941.094	815.366	757.513	725.695	776.783	731.262	723.937	728.137	736.033	786.336	732.587	820.768	793.748	1062.03	773.619	684.788	878.23	741.604	754.023	726.037	761.184	776.678	927.888
A0A0H2ZRL4	690.324	747.103	740.443	734.425	857.024	786.379	860.387	781.221	782.837	851.489	783.678	818.696	737.294	842.943	736.864	714.135	797.602	819.75	718.713	737.434	821.701	820.804	817.163	801.187	790.119	725.5	808.676
A0A0H2ZRL5	1053.82	807.874	957.396	845.67	789.047	819.061	866.188	996.242	753.603	950.999	928.204	1046.97	596.195	588.997	644.131	580.367	532.208	603.7	930.849	901.533	804.054	931.215	852.301	987.589	592.596	612.249	567.954
A0A0H2ZRL8	2105.91	1779.55	2472.13	1880.29	249.744	308.18	1024.84	930.694	671.364	983.355	357.319	435.719	307.613	372.314	360.476	317.679	226.521	421.995	1942.73	2176.21	278.962	977.768	827.36	396.519	339.964	339.077	324.258
A0A0H2ZRL9	425.179	779.757	544.497	598.038	603.646	700.884	908.396	1178.34	1166.57	1332.48	1121.33	1216.49	753.225	668.268	706.943	569.092	624.258	227.726	602.468	571.268	652.265	1043.37	1249.53	1168.91	710.747	638.018	425.992
A0A0H2ZRM0	835.628	788.784	590.086	807.038	605.565	894.474	511.698	853.72	601.999	635.257	826.869	716.314	926.516	909.843	1018.4	943.596	937.902	438.721	812.206	698.562	750.019	682.709	618.628	771.592	918.179	980.996	688.311
A0A0H2ZRM3	901.674	745.022	1539.76	1343.56	620.008	626.092	701.175	622.351	665.077	710.997	506.494	664.491	742.588	595.129	781.637	617.073	746.364	1228.5	823.348	1441.66	623.05	661.763	688.037	585.492	668.858	699.355	987.434
A0A0H2ZRM5	746.152	842.563	934.375	873.063	735.093	780.227	830.355	828.04	819.88	926.48	770.857	832.984	703.331	754.496	747.935	626.741	748.582	704.344	794.357	903.719	757.66	829.198	873.18	801.92	728.914	687.338	726.463
A0A0H2ZRM6	813.421	579.496	743.445	724.633	962.974	710.575	912.599	705.257	1021.54	774.206	894.856	820.1	558.08	541.367	583.832	988.722	570.054	1180.81	696.459	734.039	836.775	808.928	897.875	857.478	549.724	786.277	875.431
A0A0H2ZRM8	1121.23	1531.43	1140.09	862.573	1018.18	541.59	701.054	786.93	880.002	1011.54	700.775	997.178	614.24	541.761	628.674	525.37	414.981	506.484	1326.33	1001.33	779.883	743.992	945.772	848.977	578	577.022	460.732
A0A0H2ZRN0	994.916	913.02	764.455	800.759	682.499	728.907	660.7	693.014	770.68	728.997	783.676	630.989	792.586	751.44	781.582	906.646	765.421	877.401	953.968	782.607	705.703	676.857	749.839	707.332	772.013	844.114	821.411
A0A0H2ZRN6	374.268	911.242	863.118	912.402	1086.29	926.919	936.306	890.315	864.218	724.446	906.136	961.72	644.043	758.072	715.917	790.529	617.809	234.556	642.755	887.76	1006.6	913.31	794.332	933.928	701.057	753.223	426.182
A0A0H2ZRN7	688.269	927.032	983.75	871.124	599.429	642.709	413.487	849.109	603.907	697.638	582.454	490.811	1165.17	842.095	887.257	1164.94	984.59	430.322	807.651	927.437	621.069	631.298	650.772	536.632	1003.63	1026.1	707.456
A0A0H2ZRP0	787.411	672.318	858.966	781.151	814.711	711.836	825.705	709.675	835.398	763.17	760.782	762.334	752.758	749.344	707.263	775.736	693.894	1140.71	729.864	820.059	763.273	767.69	799.284	761.558	751.051	741.5	917.301
A0A0H2ZRP3	854.007	874.794	875.762	818.6	849.576	823.707	861.045	843.714	828.095	874.904	827.582	848.505	666.683	677.574	644.623	646.946	657.252	769.546	864.4	847.181	836.642	852.379	851.5	838.044	672.128	645.785	713.399
A0A0H2ZRP4	669.967	798.415	537.769	689.153	743.526	934.101	685.12	1060.87	717.517	782.001	849.943	941.755	891.483	741.507	867.398	794.291	897.186	373.723	734.191	613.461	838.813	872.996	749.759	895.849	816.495	830.845	635.455
A0A0H2ZRP6	511.801	413.577	661.109	599.147	752.376	736.678	794.876	666.591	757.453	813.985	708.428	827.951	926.84	745.194	905.318	752.241	879.855	1501.47	462.689	630.128	744.527	730.733	785.719	768.19	836.017	828.78	1190.66
A0A0H2ZRP8	730.853	727.551	791.38	752.014	783.687	855.813	665.453	758.17	674.543	714.584	669.715	790.254	905.395	871.144	855.414	876.013	879.725	671.093	729.202	771.697	819.75	711.812	694.564	729.984	888.27	865.714	775.409
A0A0H2ZRP9	933.162	938.913	846.411	830.443	786.631	585.041	700.629	699.162	691.099	497.975	877.927	623.004	741.079	771.312	683.707	1155.15	751.706	801.628	936.038	838.427	685.836	699.895	594.537	750.466	756.195	919.428	776.667
A0A0H2ZRQ1	598.015	582.27	948.062	682.581	660.096	693.154	737.443	582.633	698.019	572.503	629.963	593.686	913.803	804.568	885.808	755.859	899.573	1749.66	590.142	815.321	676.625	660.038	635.261	611.825	859.186	820.834	1324.61
A0A0H2ZRQ2	771.63	759.646	686.58	749.824	1023.3	899.011	907.379	771.149	824.162	862.61	783.153	784.759	670.145	807.024	659.909	770.126	704.451	687.831	765.638	718.202	961.156	839.264	843.386	783.956	738.584	715.018	696.141
A0A0H2ZRQ4	193.944	279.435	312.451	645.683	608.921	835.706	611.292	1014.72	678.112	905.003	762.039	1326.06	1282.19	685.079	1041.45	704.395	1150.47	734.314	236.689	479.067	722.314	813.007	791.557	1044.05	983.633	872.924	942.389
A0A0H2ZRQ5	837.991	704.541	553.661	589.688	747.928	908.769	738.145	784.357	705.416	632.21	854.492	774.605	910.924	726.393	861.015	970.492	712.678	912.185	771.266	571.674	828.349	761.251	668.813	814.549	818.658	915.754	812.432
A0A0H2ZRQ6	384.238	369.655	479.556	409.194	837.08	692.643	864.294	710.163	919.568	774.476	834.945	746.894	842.727	805.033	853.202	765.5	835.037	1751.53	376.947	444.375	764.861	787.228	847.022	790.92	823.88	809.351	1293.28
A0A0H2ZRQ8	1064.24	1596.62	998.982	1116.97	666.755	669.651	503.752	890.872	679.501	652.405	859.347	786.94	723.21	450.577	811.861	447.985	728.71	720.421	1330.43	1057.97	668.203	697.312	665.953	823.144	586.894	629.923	724.566
A0A0H2ZRR2	729.8	730.353	909.664	790.788	701.762	675.697	770.683	715.29	767.769	794.329	712.76	736.158	791.907	816.55	801.661	742.651	819.513	1068.16	730.077	850.226	688.729	742.986	781.049	724.459	804.229	772.156	943.834
A0A0H2ZRR3	1093.44	1012.33	1246.42	1357.88	754.397	881.262	464.124	616.867	540.654	546.342	578.175	660.061	844.032	708.028	815.468	667.756	783.742	682.772	1052.89	1302.15	817.829	540.495	543.498	619.118	776.03	741.612	733.257
A0A0H2ZRR5	555.133	568.448	815.442	790.152	780.586	799.816	815.302	723.134	732.437	755.018	748.88	789.522	797.049	777.78	865.092	804.987	847.951	1038.85	561.79	802.797	790.201	769.218	743.728	769.201	787.414	835.04	943.403
A0A0H2ZRR8	793.104	725.453	806.525	772.247	657.213	765.15	644.691	850.845	720.409	686.451	849	839.035	796.733	836.044	870.87	863.624	811.002	687.769	759.278	789.386	711.181	747.768	703.43	844.018	816.388	867.247	749.386
A0A0H2ZRR9	2251.55	2087.2	986.867	966.133	1455.78	754.86	400.095	303.322	388.096	318.721	323.576	333.985	619.409	501.274	397.15	986.232	582.207	829.407	2169.37	976.5	1105.32	351.708	353.408	328.78	560.341	691.691	705.807
A0A0H2ZRS1	971.071	733.364	1041.51	973.442	895.248	748.982	811.016	582.347	821.079	629.405	689.575	631.159	634.419	599.306	602.08	643.654	674.984	1589.32	852.217	1007.48	822.115	696.682	725.242	660.367	616.863	622.867	1132.15
A0A0H2ZRS2	1045.81	1151.45	840.906	610.553	789.942	691.842	648.318	617.551	678.999	620.891	595.111	539.127	865.949	946.575	792.693	884.097	789.492	931.278	1098.63	725.73	740.892	632.934	649.945	567.119	906.262	838.395	860.385
A0A0H2ZRS3	684.615	574.032	1149.06	489.492	668.335	418.994	915.472	740.222	695.005	758.663	897.295	613.278	676.392	711.095	730.625	1650.93	658.66	758.048	629.324	819.276	543.665	827.847	726.834	755.287	693.744	1190.78	708.354
A0A0H2ZRS4	354.306	552.072	622.429	914.516	965.138	554.376	812.349	643.548	467.047	639.919	512.751	579.307	1142.38	876.816	871.457	1031.81	1109.93	1110.46	453.189	768.473	759.757	727.949	553.483	546.029	1009.6	951.631	1110.19
A0A0H2ZRS6	614.179	546.393	614.294	550.713	1142.03	1147.64	1039.94	1038.99	1066.36	1146.56	993.487	1146.79	473.502	674.795	492.709	601.619	588.589	383.257	580.286	582.504	1144.84	1039.46	1106.46	1070.14	574.149	547.164	485.923
A0A0H2ZRS7	400.649	1017.29	1163.01	684.13	872.405	1136.77	135.17	705.992	163.343	451.187	183.249	615.431	1359.16	878.143	829.069	1166.93	1715.69	258.011	708.971	923.569	1004.59	420.581	307.265	399.34	1118.65	998.001	986.85
A0A0H2ZRS9	679.379	565.576	702.04	758.582	775.293	823.293	833.381	740.834	793.568	799.701	829.94	816.036	818.322	752.045	866.65	771.622	667.162	1045.43	622.478	730.311	799.293	787.108	796.635	822.988	785.184	819.136	856.298
A0A0H2ZRT1	737.717	731.106	668.482	634.478	819.623	765.377	824.095	780.221	806.031	781.358	810.392	785.497	764.41	786.999	775.053	807.243	761.636	987.881	734.411	651.48	792.5	802.158	793.694	797.945	775.705	791.148	874.758
A0A0H2ZRT2	1080.54	471.428	519.58	492.028	650.35	619.308	825.816	642.933	871.677	658.731	889.9	642.397	678.158	715.864	749.954	733.588	715.573	2064.19	775.983	505.804	634.829	734.375	765.204	766.148	697.011	741.771	1389.88
A0A0H2ZRT3	701.596	1052.41	694.944	586.534	1004.48	961.167	872.943	766.188	818.969	783.639	892.832	775.095	692.771	669.757	677.885	718.182	645.803	844.295	877.005	640.739	982.823	819.566	801.304	833.964	681.264	698.034	745.049
A0A0H2ZRT6	1070.33	588.897	847.997	724.444	689.171	778.844	606.085	640.034	674.392	717.283	785.035	718.1	802.147	710.358	793.55	742.137	751.732	1452.45	829.611	786.221	734.008	623.06	695.838	751.568	756.252	767.843	1102.09
A0A0H2ZRT7	474.265	704.405	352.084	523.59	613.616	917.095	542.406	865.514	701.323	526.557	825.647	718.527	1100.37	984.914	1103.61	1161.05	1004.24	468.226	589.335	437.837	765.355	703.96	613.94	772.087	1042.64	1132.33	736.232
A0A0H2ZRT8	957.998	886.597	840.017	866.165	857.997	795.516	822.601	729.476	885.811	840.113	819.524	795.6	603.91	610.363	614.752	706.826	673.323	926.883	922.297	853.091	826.756	776.038	862.962	807.562	607.137	660.789	800.103
A0A0H2ZRT9	609.387	725.522	815.374	923.817	745.074	738.288	812.082	727.987	743.95	728.065	706.359	768.188	851.893	726.696	798.646	739.078	877.541	1013.36	667.454	869.595	741.681	770.035	736.007	737.273	789.295	768.862	945.448
A0A0H2ZRU1	316.147	405.932	440.033	462.714	1049.11	966.238	778.077	954.22	870.565	1184.2	874.828	983.336	969.56	712.715	748.786	578.905	777.063	956.363	361.04	451.374	1007.67	866.148	1027.38	929.082	841.138	663.845	866.713
A0A0H2ZRU2	784.698	622.404	733.887	966.784	715.636	847.712	758.967	777.039	774.534	796.222	768.378	975.427	869.673	722.459	782.494	644.707	775.614	790.292	703.551	850.335	781.674	768.003	785.378	871.902	796.066	713.601	782.953
A0A0H2ZRU5	739.391	870.622	680.54	911.736	760.297	752.951	487.818	698.051	559.739	517.294	634.663	624.98	990.359	900.491	944.986	1012.22	1075.22	649.299	805.006	796.138	756.624	592.934	538.516	629.821	945.425	978.602	862.261
A0A0H2ZRU7	1017.84	944.277	727.508	460.302	1153.89	1126.69	1235.3	1310.44	1179.66	1183.51	1019.12	1236.62	379.519	462.808	217.864	408.267	269.622	274.89	981.057	593.905	1140.29	1272.87	1181.58	1127.87	421.164	313.066	272.256
A0A0H2ZRU8	582.046	505.72	626.415	422.259	829.827	808.119	896.394	730.941	726.813	1031.71	752.895	1004.46	893.753	624.156	924.854	620.878	710.494	1425.67	543.883	524.337	818.973	813.667	879.261	878.676	758.955	772.866	1068.08
A0A0H2ZRU9	628.345	818.54	1410.28	1952.42	736.486	683.213	797.152	632.372	678.232	662.081	656.795	574.102	799.979	651.731	749.189	589.902	677.36	600.809	723.442	1681.35	709.85	714.762	670.157	615.448	725.855	669.546	639.084
A0A0H2ZRV2	963.721	992.784	1009.75	703.632	703.663	915.562	747.416	847.51	765.199	913.63	761.679	922.666	721.637	787.72	682.241	455.871	722.831	707.371	978.253	856.69	809.613	797.463	839.414	842.172	754.678	569.056	715.101
A0A0H2ZRV4	393.377	478.797	626.883	673.012	863.201	881.502	826.309	768.821	766.638	826.403	716.358	963.45	891.407	868.627	917.886	725.477	884.784	883.675	436.087	649.948	872.352	797.565	796.521	839.904	880.017	821.682	884.23
A0A0H2ZRV8	599.33	788.247	895.143	901.615	939.549	1017.87	764.351	930.288	792.953	816.179	666.43	872.315	829.164	727.677	750.737	694.61	772.526	408.88	693.789	898.379	978.708	847.319	804.566	769.373	778.421	722.674	590.703
A0A0H2ZRV9	707.161	707.698	705.647	712.984	796.555	853.239	795.042	875.245	811.377	865.369	822.961	857.413	788.982	735.318	773.231	791.833	758.986	700.725	707.429	709.315	824.897	835.144	838.373	840.187	762.15	782.532	729.855
A0A0H2ZRW1	728.031	1341.17	2268.35	1854.93	558.29	679.654	670.123	785.941	569.651	819.307	513.89	794.671	603.195	529.866	778.46	332.62	663.009	224.077	1034.6	2061.64	618.972	728.032	694.479	654.281	566.531	555.54	443.543
A0A0H2ZRW2	609.733	949.529	780.273	890.463	523.519	658.733	637.692	970.575	790.402	807.715	831.94	940.915	880.083	956.768	917.586	667.135	908.789	269.716	779.631	835.368	591.126	804.134	799.059	886.427	918.426	792.361	589.253
A0A0H2ZRW3	608.476	700.9	782.331	663.349	891.285	951.24	819.89	882.978	889.767	812.747	864.081	803.399	696.781	705.927	711.489	822.282	718.438	750.494	654.688	722.84	921.262	851.434	851.257	833.74	701.354	766.885	734.466
A0A0H2ZRW4	335.123	795.004	554.1	727.239	746.043	977.012	610.729	1025.73	644.491	913.113	685.477	1016.46	1036.3	868.286	929.373	631.473	1219.44	212.666	565.063	640.67	861.528	818.231	778.802	850.969	952.293	780.423	716.052
A0A0H2ZRW6	1192.49	1726.09	2742.66	1764.57	530.037	527.529	734.672	820.11	541.736	782.538	483.478	508.174	441.139	305.014	459.494	299.606	469.259	698.543	1459.29	2253.61	528.783	777.391	662.137	495.826	373.077	379.55	583.901
A0A0H2ZRW7	746.887	546.578	771.734	556.99	623.226	593.48	868.399	584.614	828.264	665.494	698.232	660.293	845.77	808.647	794.585	776.954	806.381	1815.26	646.732	664.362	608.353	726.507	746.879	679.263	827.208	785.769	1310.82
A0A0H2ZRW8	1806.63	1095.1	1066.26	884.837	615.115	847.114	803.595	772.147	811.257	899.555	711.244	925.769	584.139	500.601	473.75	575.442	426.658	763.506	1450.87	975.548	731.114	787.871	855.406	818.507	542.37	524.596	595.082
A0A0H2ZRX0	727.214	669.76	792.423	717.205	767.874	731.748	689.477	702.029	709.186	686.092	708.947	705.109	876.426	917.617	820.2	883.319	865.582	967.681	698.487	754.814	749.811	695.753	697.639	707.028	897.022	851.759	916.632
A0A0H2ZRX1	909.526	911.145	598.859	929.733	620.645	655.158	566.705	819.905	702.19	561.547	941.966	717.419	911.559	856.488	803.59	900.917	824.327	647.906	910.336	764.296	637.901	693.305	631.868	829.692	884.024	852.254	736.117
A0A0H2ZRX3	668.959	823.391	649.043	733.776	781.183	750.674	832.246	693.12	865.212	658.121	811.346	727.696	808.27	680.437	769.38	950.47	759.271	999.902	746.175	691.41	765.928	762.683	761.667	769.521	744.354	859.925	879.587
A0A0H2ZRX5	522.832	650.34	536.16	651.966	812.792	924.788	624.235	755.183	662.588	744.135	717.784	811.265	938.376	990.085	963.815	939.663	1047.39	500.872	586.586	594.063	868.79	689.709	703.361	764.524	964.231	951.739	774.133
A0A0H2ZRX6	555.717	402.365	1796.05	2528.93	484.8	526.196	1281.93	855.916	931.051	759.676	355.728	257.559	688.332	600.885	743.007	577.069	504.275	651.348	479.041	2162.49	505.498	1068.92	845.363	306.643	644.608	660.038	577.812
A0A0H2ZRX7	588.731	677.231	582.166	747.775	729.975	875.04	577.147	853.991	672.617	683.553	869.471	869.944	922.806	918.369	939.281	931.889	943.364	430.317	632.981	664.971	802.508	715.569	678.085	869.707	920.588	935.585	686.841
A0A0H2ZRX8	763.128	600.614	639.893	522.339	837.658	687.139	776.261	665.41	867.635	643.621	874.689	662.247	738.412	729.537	678.539	1009.34	775.553	1432.59	681.871	581.116	762.399	720.835	755.628	768.468	733.974	843.939	1104.07
A0A0H2ZRY2	1526.85	1381.69	950.515	752.959	607.505	559.015	475.808	759.826	572.049	549.36	752.511	504.113	824.205	787.738	636.357	1203.26	751.273	424.44	1454.27	851.737	583.26	617.817	560.705	628.312	805.971	919.808	587.856
A0A0H2ZRY3	779.542	859.853	714.652	764.226	1026.92	934.669	939.028	922.886	897.539	981.869	897.951	957.494	590.035	638.372	608.837	595.104	595.34	576.86	819.697	739.439	980.795	930.957	939.704	927.722	614.204	601.97	586.1
A0A0H2ZRY6	2253.06	1328.69	620.651	624.379	710.681	596.689	570.011	798.769	647.297	1013.46	516.664	898.119	645.042	535.972	663.536	456.325	617.744	1059.35	1790.88	622.515	653.685	684.39	830.376	707.391	590.507	559.931	838.546
A0A0H2ZRY8	1019.57	771.276	808.767	878.217	925.356	833.298	835.761	748.956	881.135	832.858	818.111	784.334	643.347	676.16	599.044	651.467	566.582	980.589	895.423	843.492	879.327	792.359	856.996	801.223	659.753	625.256	773.585
A0A0H2ZRZ0	655.639	504.254	730.971	567.714	834.234	667.905	831.082	616.139	766.05	666.818	698.649	646.224	918.104	812.162	882.788	802.01	664.929	1718.68	579.947	649.343	751.069	723.61	716.434	672.436	865.133	842.399	1191.81
A0A0H2ZRZ1	519.959	572.51	564.818	660.353	938.229	743.476	679.141	677.874	692.396	645.003	700.458	630.324	896.626	796.796	929.785	851.264	950.523	1423.34	546.234	612.585	840.853	678.508	668.7	665.391	846.711	890.525	1186.93
A0A0H2ZRZ5	571.659	667.007	638.649	725.149	707.384	813.713	688.161	773.912	670.33	773.519	691.819	764.474	1007.88	849.065	966.032	869.866	927.821	784.969	619.333	681.899	760.549	731.036	721.924	728.147	928.471	917.949	856.395
A0A0H2ZRZ6	674.982	1002.01	687.784	926.704	910.267	748.53	613.49	559.519	559.228	440.697	611.37	504.979	923.104	793.372	915.96	1029.03	1018.3	939.522	838.498	807.244	829.399	586.504	499.962	558.174	858.238	972.494	978.909
A0A0H2ZRZ7	790.332	941.417	1373.51	874.926	703.18	775.021	917.715	1017.21	744.018	920.356	862.709	853.004	584.882	764.832	580.297	649.736	613.026	381.989	865.874	1124.22	739.1	967.461	832.187	857.857	674.857	615.016	497.507
A0A0H2ZRZ8	1080.4	887.115	1088.9	798.12	547.227	903.309	786.826	729.676	952.984	473.36	750.347	752.007	658.57	1026.22	682.893	988.662	587.63	372.257	983.756	943.51	725.268	758.251	713.172	751.177	842.393	835.777	479.944
A0A0H2ZS01	923.885	1058.64	1228.06	1474.41	683.74	563.352	439.42	606.983	565.48	552.02	580.191	632.059	945.73	695.355	735.694	1007.97	942.806	402.701	991.265	1351.24	623.546	523.202	558.75	606.125	820.543	871.833	672.754
A0A0H2ZS02	842.088	786.07	1052.16	1005.75	711.718	638.169	648.371	839.303	736.009	769.561	729.069	859.172	778.663	705.439	755.217	753.541	789.056	747.148	814.079	1028.96	674.943	743.837	752.785	794.121	742.051	754.379	768.102
A0A0H2ZS03	623.848	668.337	633.782	763.02	712.285	798.512	649.824	773.696	767.234	800.094	790.175	824.505	882.817	855.166	864.331	835.649	945.316	718.425	646.092	698.401	755.399	711.76	783.664	807.34	868.991	849.99	831.87
A0A0H2ZS06	555.366	706.706	414.96	516.455	593.906	798.088	339.299	854.129	511.734	547.133	725.867	677.117	1230.53	997.756	1065.23	1215.98	1244.3	525.595	631.036	465.707	695.997	596.714	529.434	701.492	1114.15	1140.6	884.946
A0A0H2ZS08	609.741	517.446	515.202	503.593	729.435	660.084	737.842	609.018	797.71	556.537	703.923	577.406	1012.38	939.808	899.767	987.926	859.845	1539.49	563.593	509.398	694.759	673.43	677.124	640.665	976.092	943.847	1199.67
A0A0H2ZS10	597.182	681.353	589.56	661.818	750.142	776.478	561.961	746.569	596.662	679.477	649.266	672.565	1035.91	934.918	975.978	1029.52	1074.75	744.705	639.267	625.689	763.31	654.265	638.069	660.915	985.412	1002.75	909.727
A0A0H2ZS11	732.453	830.589	711.993	808.473	765.973	794.914	589.432	733.74	605.55	665.78	623.078	841.353	875.231	966.062	863.724	786.231	1134.16	602.677	781.521	760.233	780.444	661.586	635.665	732.216	920.646	824.978	868.416
A0A0H2ZS12	626.395	721.627	773.372	685.094	829.904	845.245	894.454	832.93	837.003	930.929	847.55	871.035	718.614	720.179	761.008	762.249	702.528	749.707	674.011	729.233	837.575	863.692	883.966	859.292	719.396	761.629	726.117
A0A0H2ZS15	667.304	532.265	398.113	678.592	957.403	1046.45	652.219	994.112	861.053	921.888	982.42	1166.85	613.171	577.223	687.391	619.346	1018.95	680.78	599.785	538.352	1001.93	823.165	891.471	1074.63	595.197	653.368	849.865
A0A0H2ZS17	882.542	786.003	851.106	702.551	758.744	786.646	764.448	762.59	798.008	813.415	743.444	832.023	751.074	610.121	755.484	750.285	729.964	1085.96	834.273	776.828	772.695	763.519	805.712	787.734	680.597	752.885	907.964
A0A0H2ZS18	720.469	733.843	727.026	794.889	785.843	816.909	825.376	742.672	782.456	770.357	759.232	748.478	820.376	893.323	788.943	856.022	765.979	665.369	727.156	760.958	801.376	784.024	776.407	753.855	856.849	822.482	715.674
A0A0H2ZS19	780.227	959.418	1189.51	1098.76	1295.22	1429.46	473.423	509.71	487.231	596.054	379.254	441.397	845.511	661.666	878.944	650.462	802.367	824.24	869.822	1144.13	1362.34	491.566	541.643	410.325	753.588	764.703	813.303
A0A0H2ZS20	800.994	932.755	501.38	409.446	587.094	611.216	658.727	848.942	775.169	682.281	760.876	808.859	942.222	834.822	957.664	759.178	882.27	1176.81	866.875	455.413	599.155	753.834	728.725	784.868	888.522	858.421	1029.54
A0A0H2ZS21	460.029	775.625	733.676	1070.42	562.524	760.426	429.412	729.321	430.372	690.748	575.253	791.178	1174.91	837.772	1177.17	761.961	1233.36	646.866	617.827	902.048	661.475	579.367	560.56	683.216	1006.34	969.563	940.115
A0A0H2ZS23	1749.23	1048.69	790.934	1632.26	1119.78	718.551	929.556	483.87	867.795	448.677	827.177	434.471	369.749	581.657	328.208	936.131	328.564	747.376	1398.96	1211.6	919.164	706.713	658.236	630.824	475.703	632.169	537.97
A0A0H2ZS24	1103.99	1054.64	1208.11	898.92	714.649	771.263	751.254	736.578	734.611	736.672	705.22	813.684	642.984	662.362	667.781	748.364	646.862	711.655	1079.31	1053.51	742.956	743.916	735.642	759.452	652.673	708.072	679.259
A0A0H2ZS25	858.397	692.8	427.368	483.195	916.269	668.178	854.375	792.689	872.841	836.967	900.154	831.34	755.916	793.779	710.444	764.289	653.699	1206.75	775.598	455.281	792.223	823.532	854.904	865.747	774.848	737.366	930.225
A0A0H2ZS26	619.15	807.345	552.868	729.479	680.612	863.699	497.052	724.578	550.608	527.626	684.628	662.692	1072.07	946.388	1057.97	1021.31	1084.72	644.567	713.247	641.174	772.155	610.815	539.117	673.66	1009.23	1039.64	864.643
A0A0H2ZS27	1073.71	765.066	1392.55	1187	603.485	577.985	652.986	501.304	610.952	519.519	655.796	550.113	752.196	568.406	759.662	530.996	676.18	1953.32	919.389	1289.78	590.735	577.145	565.235	602.955	660.301	645.329	1314.75
A0A0H2ZS28	521.325	710.605	579.356	698.172	849.808	839.798	808.849	796.502	794.787	843.97	722.355	760.012	872.137	922.609	856.449	850.464	890.064	605.441	615.965	638.764	844.803	802.676	819.379	741.183	897.373	853.457	747.752
A0A0H2ZS29	510.782	656.766	461.818	596.454	644.092	588.319	722.602	928.559	757.511	424.74	932.554	566.716	1132.16	847.731	783.884	1477.41	836.472	657.868	583.774	529.136	616.206	825.58	591.126	749.635	989.948	1130.65	747.17
A0A0H2ZS30	757.918	545.75	642.885	583.736	840.765	740.093	905.333	731.168	869.831	821.237	911.414	782.554	706.731	724.61	736.587	777.039	618.243	1360.78	651.834	613.31	790.429	818.25	845.534	846.984	715.67	756.813	989.514
A0A0H2ZS31	682.726	750.355	698.49	591.677	935.242	872.293	1037.05	1010.62	1131.72	1138.65	1145.34	1130.15	458.594	604.914	456.689	620.744	483.702	520.676	716.54	645.083	903.767	1023.83	1135.18	1137.74	531.754	538.717	502.189
A0A0H2ZS32	629.713	811.543	844.364	867.966	784.234	892.544	598	821.675	665.375	834.204	749.341	828.422	845.006	812.189	901.357	677.808	913.114	586.033	720.628	856.165	838.389	709.837	749.79	788.881	828.597	789.582	749.574
A0A0H2ZS33	1600.44	871.469	954.309	927.996	804.28	748.114	764.44	776.69	835.789	826.412	701.384	721.7	496.955	612.171	507.011	598.564	576.105	1109.71	1235.95	941.153	776.197	770.565	831.101	711.542	554.563	552.788	842.908
A0A0H2ZS34	863.612	842.149	802.524	817.451	1060.14	956.507	797.994	791.214	947.046	782.985	722.076	765.212	642.61	671.011	615.76	663.799	631.101	873.686	852.88	809.987	1008.32	794.604	865.016	743.644	656.81	639.78	752.394
A0A0H2ZS35	1056.8	1560.3	2499.5	1252.38	353.169	517.232	609.586	795.285	422.34	853.526	488.553	690.878	806.848	752.205	602.449	462.597	585.643	381.08	1308.55	1875.94	435.201	702.436	637.933	589.715	779.527	532.523	483.361
A0A0H2ZS36	927.47	852.345	865.594	980.474	907.906	910.603	665.388	723.723	672.956	620.345	783.217	816.065	760.179	769.426	727.311	757.613	726.897	657.857	889.908	923.034	909.255	694.555	646.651	799.641	764.802	742.462	692.377
A0A0H2ZS37	665.882	651.123	656.892	710.635	904.7	801.353	802.12	737.995	839.111	672.74	812.182	686.979	753.677	816.091	755.146	846.184	767.683	1095.99	658.502	683.764	853.026	770.058	755.926	749.581	784.884	800.665	931.836
A0A0H2ZS38	538.984	1011.12	553.526	1035.92	1031.27	856.174	942.995	749.91	775.846	573.427	738.475	650.449	879.848	781.102	667.748	881.022	808.044	503.856	775.05	794.723	943.72	846.452	674.637	694.462	830.475	774.385	655.95
A0A0H2ZS41	905.031	685.579	562.184	622.078	888.657	760.484	989.654	767.811	1083.2	845.13	1026.9	870.82	551.52	748.247	491.852	751.158	528.277	1041.96	795.305	592.131	824.57	878.732	964.166	948.858	649.884	621.505	785.118
A0A0H2ZS42	934.359	765.742	753.818	709.929	924.145	793.021	897.13	705.267	829.464	685.481	848.063	710.142	635.853	779.054	618.271	825.335	626.418	1069.84	850.051	731.873	858.583	801.198	757.473	779.103	707.453	721.803	848.131
A0A0H2ZS43	985.713	824.727	900.119	717.696	745.708	652.46	788.506	664.869	807.26	715.708	786.592	733.599	742.735	635.988	699.729	711.602	618.87	1455.9	905.22	808.907	699.084	726.688	761.484	760.095	689.362	705.666	1037.39
A0A0H2ZS44	562.334	689.127	667.303	554.76	787.351	717.279	979.763	973.711	974.44	1103.95	907.532	1086.31	758.224	630.351	702.521	640.652	623.676	806.883	625.73	611.031	752.315	976.737	1039.2	996.922	694.288	671.586	715.279
A0A0H2ZS46	713.189	661.365	787.189	787.536	836.111	797.911	750.883	704.719	700.579	716.536	709.115	716.881	819.075	840.052	834.957	811.27	828.977	996.253	687.277	787.362	817.011	727.801	708.558	712.998	829.563	823.114	912.615
A0A0H2ZS47	508.101	579.656	498.232	607.717	662.604	908.813	549.871	942.374	728.964	780.932	874.225	908.1	1005.15	988.583	889.149	867.979	1043.9	421.767	543.878	552.974	785.709	746.122	754.948	891.163	996.869	878.564	732.832
A0A0H2ZS48	798.386	555.763	664.504	573.371	701.93	597.053	836.052	627.285	737.055	668.858	787.063	632.313	818.971	719.269	858.404	719.669	762.408	1958.26	677.074	618.938	649.491	731.669	702.956	709.688	769.12	789.037	1360.33
A0A0H2ZS49	859.751	682.26	796.707	691.494	773.434	711.243	943.078	749.906	843.624	804.84	845.226	658.031	551.843	516.545	801.61	773.467	648.559	1531.66	771.005	744.101	742.338	846.492	824.232	751.629	534.194	787.539	1090.11
A0A0H2ZS50	466.936	827.662	472.067	645.426	489.122	760.568	602.954	1174.03	743.197	693.573	634.443	1032.04	1330.19	772.629	973.543	930.797	1030.03	211.844	647.299	558.746	624.845	888.493	718.385	833.241	1051.41	952.17	620.939
A0A0H2ZS53	959.193	818.19	801.15	731.547	905.628	749.275	870.217	737.404	905.964	871.499	835.247	814.898	605.657	641.843	591.408	703.039	610.365	1077.6	888.691	766.349	827.452	803.811	888.731	825.072	623.75	647.223	843.983
A0A0H2ZS54	560.52	496.987	765.515	585.713	810.73	679.637	618.535	540.997	559.527	574.102	539.139	544.662	1020.34	1069.48	1002.46	982.269	1026.46	1389.98	528.754	675.614	745.183	579.766	566.814	541.901	1044.91	992.365	1208.22
A0A0H2ZS56	707.606	762.126	674.149	818.758	968.578	983.711	650.765	757.308	794.883	752.676	679.32	807.154	763.259	880.654	788.305	843.38	922.978	438.751	734.866	746.454	976.145	704.036	773.779	743.237	821.956	815.842	680.864
A0A0H2ZS59	633.408	616.496	688.289	583.976	971.722	798.311	738.032	663.689	765.588	610.014	933.814	665.782	805.629	681.682	716.671	1052.03	688.088	1281.79	624.952	636.132	885.016	700.86	687.801	799.798	743.656	884.351	984.94
A0A0H2ZS60	2686.69	2214.55	1736.84	1141.63	490.662	463.746	714.624	713.815	645.39	856.178	547.047	518.29	277.208	315.711	269.495	304.222	284.37	928.047	2450.62	1439.24	477.204	714.22	750.784	532.668	296.459	286.859	606.209
A0A0H2ZS62	456.88	1225.48	442.316	602.905	545.768	697.235	407.153	933.666	559.661	514.306	853.355	653.388	1310.58	881.557	1076.99	1073.08	1024.86	374.217	841.182	522.61	621.502	670.409	536.983	753.371	1096.07	1075.04	699.54
A0A0H2ZS63	4442.84	4298.56	2056.57	1262.2	129.147	129.682	553.004	447.031	335.734	529.887	171.531	326.412	119.412	158.581	109.558	132.067	141.903	367.141	4370.7	1659.39	129.414	500.018	432.81	248.971	138.996	120.812	254.522
A0A0H2ZS64	598.082	521.893	682.937	605.175	726.848	677.81	797.987	648.387	764.419	704.385	742.578	672.624	866.465	978.84	874.759	862.489	865.244	1282.85	559.987	644.056	702.329	723.187	734.402	707.601	922.652	868.624	1074.05
A0A0H2ZS65	819.4	859.916	690.293	711.367	625.796	415.124	725.697	365.067	528.563	345.34	706.209	377.515	295.161	1596.35	936.108	1364.39	1581.9	550.399	839.658	700.83	520.46	545.382	436.951	541.862	945.757	1150.25	1066.15
A0A0H2ZS66	658.262	664.86	876.71	775.605	701.304	727.254	695.098	671.268	656.224	706.812	650.02	685.978	922.669	809.418	946.416	779.836	856.937	1220.49	661.561	826.158	714.279	683.183	681.518	667.999	866.043	863.126	1038.71
A0A0H2ZS67	786.902	745.6	934.24	943.969	841.958	737.179	749.143	740.246	772.849	812.967	733.273	796.105	731.187	751.711	696.072	732.082	792.153	841.478	766.251	939.105	789.568	744.695	792.908	764.689	741.449	714.077	816.816
A0A0H2ZS68	931.115	928.513	926.455	726.09	817.071	724.424	990.871	811.711	934.955	818.96	906.719	795.04	498.504	427.187	552.782	480.793	566.549	1565.59	929.814	826.272	770.748	901.291	876.957	850.879	462.846	516.787	1066.07
A0A0H2ZS69	1230.9	884.393	581.454	717.209	681.93	564.701	391.359	661.842	544.118	415.978	685.137	581.181	938.786	851.146	739.121	1479.08	1113.8	590.142	1057.65	649.331	623.316	526.601	480.048	633.159	894.966	1109.1	851.968
A0A0H2ZS71	635.418	776.391	754.065	829.824	726.168	939.827	720.08	864.295	807.065	941.841	852.007	1025.07	924.029	807.856	748.812	655.758	754.774	320.62	705.905	791.945	832.997	792.188	874.453	938.536	865.942	702.285	537.697
A0A0H2ZS72	792.816	771.548	706.09	767.775	738.106	847.361	689.848	897.498	764.261	821.613	859.477	867.456	819.284	847.63	780.736	848.785	789.729	388.475	782.182	736.932	792.734	793.673	792.937	863.467	833.457	814.761	589.102
A0A0H2ZS73	736.069	1041.91	610.575	1055.51	620.934	601.664	515.277	638.106	590.507	420.526	700.697	567.071	1136.36	1003.12	832.988	1182.84	1078.79	332.835	888.99	833.041	611.299	576.692	505.516	633.884	1069.74	1007.91	705.812
A0A0H2ZS74	568.539	1004.87	704.51	795.617	793.955	802.883	653.212	824.027	651.286	682.844	834.434	844.276	876.448	877.241	865.077	788.109	931.31	451.035	786.706	750.063	798.419	738.619	667.065	839.355	876.844	826.593	691.173
A0A0H2ZS77	575.631	644.367	662.974	684.944	841.18	808.13	796.64	814.516	759.838	935.797	767.118	853.301	828.533	868.069	815.35	739.021	873.31	737.849	609.999	673.959	824.655	805.578	847.817	810.21	848.301	777.186	805.58
A0A0H2ZS78	1121.64	1222.32	1089	981.253	556.377	575.5	914.814	931.013	814.456	883.636	931.772	906.436	649.088	506.461	596.18	486.641	476.538	803.628	1171.98	1035.13	565.938	922.913	849.046	919.104	577.774	541.41	640.083
A0A0H2ZS79	340.819	510.866	562.008	654.388	869.724	988.422	604.169	775.029	558.824	741.235	575.348	858.23	1001.63	872.159	1094.25	782.884	1190.65	862.507	425.842	608.198	929.073	689.599	650.029	716.789	936.892	938.569	1026.58
A0A0H2ZS80	740.529	2337.42	1050.93	1017.22	511.924	488.685	675.679	887.026	623.225	615.477	830.991	656.357	750.479	499.514	926.268	573.509	875.184	241.676	1538.98	1034.08	500.304	781.352	619.351	743.674	624.996	749.889	558.43
A0A0H2ZS81	438.083	315.662	1110.35	359.935	829.588	544.867	942.6	524.353	579.027	747.537	686.495	783.562	711.957	467.384	1023.96	543.306	737.347	2861.6	376.872	735.143	687.228	733.476	663.282	735.029	589.671	783.633	1799.47
A0A0H2ZS83	564.496	572.663	687.897	794.856	940.403	887.596	826.064	700.135	777.926	770.312	793.399	775.465	763.87	689.233	786.349	698.911	809.061	1222.69	568.58	741.376	913.999	763.099	774.119	784.432	726.551	742.63	1015.88
A0A0H2ZS84	476.816	578.095	579.798	621.752	864.276	826.915	689.289	711	684.117	745.303	712.711	696.996	891.061	926.569	966.329	871.122	991.428	1009.44	527.455	600.775	845.596	700.145	714.71	704.854	908.815	918.725	1000.43
A0A0H2ZS85	550.896	847.16	776.975	653.722	755.956	998.299	711.547	1019.63	794.79	1068.63	732.699	1003.64	856.712	662.181	844.98	388.103	896.359	679.767	699.028	715.349	877.127	865.59	931.708	868.171	759.447	616.541	788.063
A0A0H2ZS86	741.403	524.546	814.687	561.777	846.527	715.482	951.007	693.317	896.808	788.406	848.697	743.434	646.677	815.073	641.943	881.42	656.583	1274.87	632.974	688.232	781.004	822.162	842.607	796.066	730.875	761.682	965.727
A0A0H2ZS87	774.058	566.188	1023.98	752.708	965.882	757.236	512.059	526.413	563.389	504.102	562.49	532.391	872.627	676.64	833.802	659.963	915.621	2094.93	670.123	888.344	861.559	519.236	533.746	547.441	774.634	746.883	1505.27
A0A0H2ZS88	1114.74	897.139	386.45	788.328	511.359	737.549	693.25	799.666	746.332	481.79	1526.71	674.556	598.695	669.33	615.197	1067.3	651.371	853.35	1005.94	587.389	624.454	746.458	614.061	1100.63	634.013	841.251	752.36
A0A0H2ZS89	551.942	881.354	695.429	728.489	852.424	1053.89	719.292	758.522	699.013	612.953	639.359	665.974	996.506	887.268	815.566	740.897	936.172	745.548	716.648	711.959	953.157	738.907	655.983	652.667	941.887	778.232	840.86
A0A0H2ZS90	546.987	911.201	1096.93	1018.35	1013.14	999.924	786.015	891.487	709.824	809.878	851.302	860.483	618.381	684.175	655.185	629.622	772.883	393.525	729.094	1057.64	1006.53	838.751	759.851	855.892	651.278	642.403	583.204
A0A0H2ZS91	1205.02	1617.92	1656.47	1813.88	674.846	676.299	595.609	711.548	620.145	549.149	724.376	536.534	554.808	459.963	673.427	528.136	577.097	392.062	1411.47	1735.17	675.573	653.579	584.647	630.455	507.385	600.781	484.579
A0A0H2ZS93	1292.66	1011.31	928.532	656.971	523.449	488.62	688.923	543.079	516.22	479.236	567.239	501.24	649.103	1020.46	792.675	970.034	1115.37	1228.06	1151.98	792.751	506.034	616.001	497.728	534.24	834.782	881.355	1171.72
A0A0H2ZS95	829.046	874.99	657.229	873.542	671.944	809.771	481.051	745.149	559.486	521.578	666.645	723.009	980.052	951.237	914.073	946.077	1106.69	516.033	852.018	765.385	740.857	613.1	540.532	694.827	965.644	930.075	811.36
A0A0H2ZS96	1012.46	896.993	645.65	623.77	518.53	499.411	640.588	649.429	683.423	485.794	906.059	485.193	871.53	893.167	887.897	1247.95	761.037	1039.16	954.727	634.71	508.97	645.009	584.608	695.626	882.348	1067.92	900.097
A0A0H2ZS97	734.044	907.271	682.543	843.064	779.025	931.865	548.808	832.062	611.648	646.169	796.584	733.776	907.084	734.686	864.796	871.43	959.173	564.674	820.658	762.804	855.445	690.435	628.909	765.18	820.885	868.113	761.923
A0A0H2ZSA0	641.844	478.459	659.535	580.782	878.68	826.438	1357.71	1282.54	1323.93	1374.14	1309.09	1327.63	304.976	495.532	319.671	475.983	281.492	497.413	560.152	620.159	852.559	1320.12	1349.04	1318.36	400.254	397.827	389.453
A0A0H2ZSA2	901.63	876.575	1075.63	761.246	764.864	831.355	751.096	774.047	735.277	883.211	666.566	816.258	720.521	773.304	751.015	718.076	734.52	693.049	889.102	918.44	798.11	762.571	809.244	741.412	746.912	734.546	713.785
A0A0H2ZSA5	695.33	732.889	564.744	780.479	729.269	784.077	856.07	706.976	839.132	620.653	720.929	805.468	849.056	681.493	804.139	930.948	865.571	976	714.109	672.612	756.673	781.523	729.893	763.199	765.274	867.544	920.785
A0A0H2ZSA7	889.014	956.172	989.577	1002.76	1039.29	1046.08	813.812	954.351	906.075	1062.43	939.105	954.714	519.317	542.855	525.985	471.185	504.513	337.819	922.593	996.17	1042.69	884.082	984.25	946.91	531.086	498.585	421.166
A0A0H2ZSA8	366.477	532.925	483.911	588.161	550.68	635.98	555.449	571.919	524.742	596.184	515.53	605.184	1271.91	1091.8	1250	980.978	1206.29	1262.73	449.701	536.036	593.33	563.684	560.463	560.357	1181.85	1115.49	1234.51
A0A0H2ZSA9	852.787	665.428	696.557	650.598	1000.57	818.557	882.206	726.312	899.711	788.464	849.27	798.788	597.706	745.217	611.86	840.536	655.427	1018.91	759.108	673.578	909.564	804.259	844.087	824.029	671.461	726.198	837.17
A0A0H2ZSB0	1416.84	960.714	892.88	658.529	369.013	220.403	789.308	680.624	855.15	453.718	887.741	810.972	881.215	671.12	585.326	1630.39	431.058	634.707	1188.78	775.704	294.708	734.966	654.434	849.357	776.167	1107.86	532.882
A0A0H2ZSB5	985.683	877.295	933.056	823.601	821.123	791.18	824.325	819.586	872.539	875.994	840.068	840.095	609.653	717.018	604.715	743.55	611.697	642.432	931.489	878.329	806.152	821.956	874.266	840.082	663.336	674.133	627.064
A0A0H2ZSB6	326.51	556.769	534.163	565.775	794.197	842.518	897.558	883.146	858.558	893.53	896.458	861.701	808.284	890.176	884.281	794.57	846.326	765.41	441.64	549.969	818.357	890.352	876.044	879.08	849.23	839.426	805.868
A0A0H2ZSB9	1452.64	1473.63	1592.13	1195.95	605.194	691.418	515.026	683.516	574.084	691.758	486.394	788.66	709.102	502.365	672.474	539.573	688.755	704.453	1463.14	1394.04	648.306	599.271	632.921	637.527	605.733	606.023	696.604
A0A0H2ZSC0	1221.3	1089.67	950.812	1010.78	1018.79	941.454	399.87	656.748	439.365	612.559	428.769	570.923	906.999	754.634	842.914	727.593	883.33	749.05	1155.49	980.794	980.124	528.309	525.962	499.846	830.816	785.254	816.19
A0A0H2ZSC1	664.285	661.889	677.257	688.203	752.188	729.099	793.83	769.049	772.691	806.142	798.394	783.029	837.422	881.666	818.255	879.238	817.884	809.82	663.087	682.73	740.644	781.44	789.416	790.711	859.544	848.746	813.852
A0A0H2ZSC2	665.064	725.025	637.774	589.58	823.203	901.553	865.473	1017.9	884.668	1060.84	907.674	946.582	688.02	791.91	754.568	702.123	726.89	421.54	695.045	613.677	862.378	941.689	972.755	927.128	739.965	728.345	574.215
A0A0H2ZSC4	1245.2	846.509	900.408	755.154	837.291	874.755	647.821	753.764	743.206	724.276	795.516	794.025	736.163	653.993	665.547	716.986	544.752	1013.97	1045.85	827.781	856.023	700.793	733.741	794.771	695.078	691.266	779.361
A0A0H2ZSC5	524.333	810.638	776.939	737.229	676.8	897.408	663.747	853.458	611.238	738.188	714.488	769.326	815.175	875.286	998.725	794.151	1099	588.149	667.485	757.084	787.104	758.602	674.713	741.907	845.231	896.438	843.573
A0A0H2ZSC6	732.735	825.278	502.53	707.93	529.118	607.017	352.771	625.919	494.081	429.191	527.891	600.53	1259.57	1113.37	955.845	1384.72	1381.81	428.734	779.006	605.23	568.068	489.345	461.636	564.21	1186.47	1170.28	905.274
A0A0H2ZSC7	687.209	641.282	794.224	782.826	803.984	783.665	847.346	775.602	822.921	857.96	777.595	822.903	804.364	609.796	794.326	669.756	670.094	1209.82	664.245	788.525	793.824	811.474	840.441	800.249	707.08	732.041	939.959
A0A0H2ZSC8	727.792	625.472	651.997	704.333	903.655	776.283	599.476	706.784	709.027	644.94	808.187	693.927	851.692	838.015	810.079	920.205	852.184	1068.29	676.632	678.165	839.969	653.13	676.983	751.057	844.853	865.142	960.237
A0A0H2ZSC9	944.681	983.115	958.285	835.657	1350.71	1214.52	399.66	400.515	463.564	417.152	384.119	362.168	881.922	903.731	852.055	809.48	855.065	1088.3	963.898	896.971	1282.62	400.087	440.358	373.143	892.827	830.768	971.682
A0A0H2ZSD0	575.312	482.094	532.925	415.767	919.576	773.753	884.653	749.241	951.397	798.672	984.927	849.256	692.621	898.019	661.224	969.216	713.585	1018.18	528.703	474.346	846.665	816.947	875.034	917.091	795.32	815.22	865.883
A0A0H2ZSD1	612.51	687.169	700.337	1686.01	627.063	495.977	510.558	589.815	593.465	404.456	572.196	508.092	1129.87	894.271	778.352	1261.23	1289.23	277.351	649.839	1193.17	561.52	550.187	498.96	540.144	1012.07	1019.79	783.289
A0A0H2ZSD2	774.756	1002.02	1043.37	806.599	951.515	931.497	755.936	875.298	564.355	771.589	696.612	828.995	678.501	610.073	915.792	550.147	710.315	860.252	888.39	924.987	941.506	815.617	667.972	762.804	644.287	732.969	785.284
A0A0H2ZSD3	473.793	1027.92	818.902	1272.93	875.653	926.394	572.337	681.976	716.08	687.341	628.641	866.091	867.457	773.132	763.609	586.747	1168.81	355.744	750.858	1045.92	901.024	627.156	701.71	747.366	820.295	675.178	762.276
A0A0H2ZSD6	823.185	766.048	747.428	805.484	872.605	949.203	586.071	695.445	579.793	677.336	578.078	759.159	921.45	828.853	908.441	775.254	944.087	807.665	794.617	776.456	910.904	640.758	628.565	668.619	875.151	841.847	875.876
A0A0H2ZSD7	765.054	1135.82	982.792	958.119	532.844	912.365	433.895	848.726	551.177	818.878	559.3	944.506	1090.14	718.244	965.79	661.915	1040.84	193.778	950.439	970.455	722.604	641.31	685.027	751.903	904.19	813.853	617.309
A0A0H2ZSD8	916.292	646.622	651.489	778.702	682.453	400.205	691.449	418.866	580.309	354.346	736.777	355.362	530.52	1366.1	872.761	1376.5	1267.21	918.379	781.457	715.096	541.329	555.157	467.327	546.069	948.312	1124.63	1092.79
A0A0H2ZSD9	956.194	921.861	1086.74	812.271	782.043	726.563	798.882	727.62	751.351	752.754	791.213	699.437	649.401	614.576	672.173	597.286	635.789	1329.19	939.028	949.507	754.303	763.251	752.052	745.325	631.988	634.729	982.492
A0A0H2ZSE1	930.637	669.551	501.154	647.473	591.877	712.738	542.082	733.538	893.765	619.781	801.06	791.763	966.315	971.313	847.374	1122.01	800.719	607.783	800.094	574.313	652.307	637.81	756.773	796.411	968.814	984.694	704.251
A0A0H2ZSE2	676.255	638.435	926.401	796.175	814.989	814.821	798.851	780.951	851.564	876.295	732.316	867.117	713.25	745.557	731.118	772.227	781.371	801.592	657.345	861.288	814.905	789.901	863.93	799.716	729.404	751.673	791.481
A0A0H2ZSE3	792.411	755.701	749.848	497.497	451.503	460.022	775.01	942.301	863.728	985.524	875.581	978.974	825.924	888.855	796.749	708.2	801.99	874.915	774.056	623.672	455.762	858.655	924.626	927.277	857.389	752.474	838.452
A0A0H2ZSE7	1506.64	975.08	1589.31	1208.58	577.282	682.443	426.594	760.587	504.44	794.739	529.526	731.889	810.656	581.103	711.496	646.45	623.174	805.927	1240.86	1398.95	629.862	593.59	649.59	630.707	695.88	678.973	714.551
A0A0H2ZSE8	1547.65	992.155	1474.22	1231.29	690.013	575.345	831.106	796.816	900.425	862.291	782.565	803.054	391.402	489.431	420.335	559.821	341.499	934.012	1269.9	1352.75	632.679	813.961	881.358	792.809	440.417	490.078	637.755
A0A0H2ZSE9	759.248	652.161	630.171	547.846	812.621	717.873	823.732	754.474	858.624	774.077	810.299	702.018	729.992	849.878	747.226	836.158	790.355	1185.19	705.704	589.009	765.247	789.103	816.351	756.159	789.935	791.692	987.772
A0A0H2ZSF0	483.056	635.404	587.015	658.637	853.827	883.872	755.262	806.641	694.152	905.383	664.656	824.86	879.358	882.633	910.949	792.77	1041.32	672.327	559.23	622.826	868.85	780.952	799.767	744.758	880.996	851.859	856.825
A0A0H2ZSF1	839.121	871.249	1105.06	842.005	604.93	579.553	851.099	1035.07	1022.62	1171.3	880.999	1096.29	629.206	596.071	716.749	445.797	463.345	667.455	855.185	973.53	592.241	943.084	1096.96	988.644	612.638	581.273	565.4
A0A0H2ZSF5	667.881	713.734	650.71	783.017	717.71	896.092	676.347	874.15	748.335	884.447	856.279	926.217	879.446	765.058	847.59	791.943	844.649	467.731	690.808	716.863	806.901	775.249	816.391	891.248	822.252	819.766	656.19
A0A0H2ZSF6	570.841	827.903	950.55	890.738	732.881	869.01	752.387	919.491	670.089	758.075	828.211	713.943	735.831	813.135	939.888	698.597	797.149	628.262	699.372	920.644	800.946	835.939	714.082	771.077	774.483	819.242	712.705
A0A0H2ZSF7	811.828	878.537	1093.74	838.11	569.248	576.764	801.702	734.311	758.589	844.315	768.601	793.022	712.983	731.5	788.676	668.841	756.574	1064.69	845.182	965.924	573.006	768.007	801.452	780.811	722.241	728.758	910.633
A0A0H2ZSF8	856.293	911.142	1430.78	1166.44	670.333	684.266	930.522	779.721	751.725	816.65	738.535	702.721	579.239	530.21	685.765	571.234	574.185	1059.5	883.717	1298.61	677.299	855.121	784.188	720.628	554.724	628.499	816.842
A0A0H2ZSF9	353.135	125.468	342.159	273.982	225.632	343.098	236.404	380.051	286.945	375.914	269.87	340.255	1607.38	803.854	1617.77	1060.24	1617.86	3088.57	239.302	308.07	284.365	308.227	331.43	305.062	1205.62	1339	2353.22
A0A0H2ZSG0	1060.19	909.511	1593.67	1356.98	542.616	698.224	757.572	707.02	769.24	984.748	581.479	803.015	765.765	607.2	714.27	523.284	482.777	654.551	984.851	1475.32	620.42	732.296	876.994	692.247	686.483	618.777	568.664
A0A0H2ZSG1	615.854	756.495	673.138	711.557	733.902	895.872	907.325	915.745	804.371	970.987	869.343	875.032	749.169	740.253	855.305	623.169	739.213	693.788	686.174	692.347	814.887	911.535	887.679	872.188	744.711	739.237	716.5
A0A0H2ZSG2	1031.41	1140.41	1373.27	1205.64	748.07	638.544	993.856	890.559	856.658	1031.09	746.042	872.552	482.387	465.545	543.022	452.063	497.122	636.027	1085.91	1289.46	693.307	942.208	943.876	809.297	473.966	497.542	566.575
A0A0H2ZSG3	667.991	679.901	549.436	754.753	721.346	861.188	608.004	818.755	705.113	710.281	793.314	818.913	956.597	903.836	909.066	973.128	934.262	453.814	673.946	652.094	791.267	713.379	707.697	806.114	930.217	941.097	694.038
A0A0H2ZSG4	724.85	762.724	908.013	790.678	628.996	759.641	833.661	888.211	742.692	748.632	864.034	933.704	784.391	812.23	749.872	729.74	756.527	670.586	743.787	849.346	694.318	860.936	745.662	898.869	798.311	739.806	713.557
A0A0H2ZSG6	738.196	412.61	878.816	707.648	859.179	691.573	783.93	552.069	635.837	631.301	629.737	633.771	780.825	712.667	848.518	739.447	867.546	1952.7	575.403	793.232	775.376	668	633.569	631.754	746.746	793.982	1410.12
A0A0H2ZSG7	587.086	644.197	748.704	505.312	751.01	708.411	823.061	713.423	806.095	765.321	903.609	691.226	733.26	801.643	747.398	898.099	832.774	1273.35	615.642	627.008	729.711	768.242	785.708	797.417	767.451	822.748	1053.06
A0A0H2ZSG9	2114.48	2405.54	1065.96	1022.28	572.534	528.525	784.121	496.912	721.994	444.316	645.308	291.085	516.598	635.131	486.483	791.8	450.57	546.452	2260.01	1044.12	550.53	640.517	583.155	468.197	575.865	639.142	498.511
A0A0H2ZSH1	673.51	758.363	727.179	845.257	729.06	706.444	670.544	866.162	702.354	437.743	723.588	479.427	931.487	886.983	907.46	1215.28	854.847	653.595	715.937	786.218	717.752	768.353	570.048	601.507	909.235	1061.37	754.221
A0A0H2ZSH2	681.344	772.911	691.343	517.471	722.929	692.531	936.583	831.181	916.094	871.918	885.391	866.92	723.422	696.91	740.616	681.901	678.261	1205.58	727.128	604.407	707.73	883.882	894.006	876.155	710.166	711.259	941.92
A0A0H2ZSH3	2060.73	2329.42	1659.68	787.028	438.663	484.019	717.397	838.998	572.173	918.328	442.154	500.462	525.422	583.454	600.849	475.81	469.305	438.457	2195.07	1223.35	461.341	778.198	745.251	471.308	554.438	538.329	453.881
A0A0H2ZSH4	712.623	1026.27	784.25	1081.58	733.219	866.164	512.024	932.864	619.06	519.114	689.242	697.258	889.37	766.932	837.923	719.726	1113.49	505.351	869.447	932.913	799.691	722.444	569.087	693.25	828.151	778.824	809.421
A0A0H2ZSH5	792.981	911.925	823.966	831.201	887.517	883.117	802.776	858.352	893.281	888.654	802.747	883.742	685.625	658.861	673.182	600.182	675.058	694.526	852.453	827.584	885.317	830.564	890.968	843.244	672.243	636.682	684.792
A0A0H2ZSH6	545.173	655.351	709.129	653.215	694.442	764.952	656.885	725.804	727.975	1067.06	726.578	888.075	1007.17	997.966	872.746	603.633	930.255	759.674	600.262	681.172	729.697	691.345	897.516	807.327	1002.57	738.189	844.965
A0A0H2ZSH7	728.59	705.071	720.554	750.7	983.701	979.02	930.241	835.023	946.367	903.151	839.434	837.608	629.842	767.977	621.727	698.301	636.296	660.904	716.83	735.627	981.361	882.632	924.759	838.521	698.909	660.014	648.6
A0A0H2ZSH9	653.2	692.574	703.282	715.165	989.914	978.668	785.292	797.407	827.141	901.581	796.327	845.61	745.191	757.095	738.474	727.053	739.158	710.218	672.887	709.224	984.291	791.35	864.361	820.969	751.143	732.764	724.688
A0A0H2ZSI0	934.863	1058.14	786.498	907.346	862.559	871.84	838	869.73	839.326	780.593	818.388	758.642	649.351	663.226	657.306	633.589	671.342	652.454	996.503	846.922	867.199	853.865	809.959	788.515	656.289	645.447	661.898
A0A0H2ZSI1	1169.43	990.485	767.105	595.547	595.021	561.706	830.02	759.255	820.165	858.507	804.187	833.956	755.237	765.77	693.435	806.137	629.365	909.533	1079.96	681.326	578.364	794.637	839.336	819.072	760.503	749.786	769.449
A0A0H2ZSI6	840.528	619.623	762.161	634.818	822.697	663.674	693.898	657.681	759.691	680.074	796.142	719.704	808.801	572.612	757.867	625.84	744.514	1960.29	730.075	698.49	743.185	675.789	719.883	757.923	690.707	691.853	1352.4
A0A0H2ZSI7	584.894	535.289	594.41	606.101	783.26	757.864	792.122	709.776	842.079	814.929	756.997	754.75	848.137	949.962	826.923	903.527	872.21	938.633	560.092	600.256	770.562	750.949	828.504	755.874	899.049	865.225	905.421
A0A0H2ZSI8	583.373	447.43	1031.37	840.227	993.439	699.675	894.291	982.734	725.154	658.595	770.486	613.987	686.553	840.391	784.335	912.194	613.462	984.038	515.401	935.799	846.557	938.512	691.875	692.236	763.472	848.264	798.75
A0A0H2ZSI9	933.075	842.273	986.81	706.906	792.716	738.582	1012.35	765.022	813.346	868.857	735.217	781.222	620.468	603.877	656.09	647.731	597.43	1220.55	887.674	846.858	765.649	888.686	841.101	758.219	612.173	651.91	908.988
A0A0H2ZSJ1	554.227	705.814	697.836	809.953	698.166	790.662	647.774	658.581	590.239	704.604	635.702	685.469	984.209	1009.8	1007.95	760.995	1051.07	887.944	630.02	753.895	744.414	653.178	647.421	660.586	997.004	884.474	969.508
A0A0H2ZSJ6	759.685	829.27	768.939	796.636	667.261	991.735	599.223	892.463	663.183	761.065	690.462	818.392	934.085	823.312	946.779	623.318	897.073	617.295	794.478	782.788	829.498	745.843	712.124	754.427	878.699	785.048	757.184
A0A0H2ZSJ7	965.32	1224.37	1138.15	1437.14	365.778	573.751	568.156	847.424	574.821	761.216	710.118	786.733	868.336	564.912	918.968	607.296	905.641	423.107	1094.85	1287.64	469.764	707.79	668.019	748.426	716.624	763.132	664.374
A0A0H2ZSJ8	2152.38	1725.18	1050.84	1389.88	411.033	565.978	433.198	733.121	495.152	651.243	787.65	734.79	636.383	554.095	683.946	560.399	588.096	351.45	1938.78	1220.36	488.506	583.16	573.197	761.22	595.239	622.173	469.773
A0A0H2ZSJ9	1988.56	2165.18	1507.55	1804.93	649.133	476.466	453.318	488.663	484.557	500.082	499.745	405.851	640.437	512.634	584.459	557.644	575.63	361.332	2076.87	1656.24	562.799	470.991	492.319	452.798	576.536	571.052	468.481
A0A0H2ZSK0	644.746	635.535	738.837	596.059	710.063	643.478	845.467	896.122	867.977	742.199	882.213	795.426	734.517	944.679	771.403	1013.74	758.539	669.558	640.141	667.448	676.771	870.794	805.088	838.82	839.598	892.569	714.049
A0A0H2ZSK1	816.063	1022.18	751.849	698.271	579.804	625.509	778.808	733.857	692.829	879.508	746.115	793.84	886.271	852.464	1004.42	732.019	716.053	760.894	919.122	725.06	602.657	756.332	786.169	769.977	869.368	868.219	738.474
A0A0H2ZSK2	834.971	1187.27	544.858	594.514	698.494	466.867	926.196	699.502	774.866	768.67	930.787	789.467	702.907	706.343	678.38	813.023	846.045	1060.33	1011.12	569.686	582.68	812.849	771.768	860.127	704.625	745.701	953.185
A0A0H2ZSK3	678.729	753.92	535.543	639.338	687.203	965.726	636.283	1011.86	720.321	666.501	752.974	882.45	984.886	873.741	950.094	958.159	905.83	255.771	716.325	587.44	826.465	824.072	693.411	817.712	929.314	954.127	580.8
A0A0H2ZSK4	637.894	588.528	598.29	544.501	837.052	768.965	834.74	730.391	846.498	778.158	829.493	751.234	734.78	784.602	813.914	895.595	800.431	1167.98	613.211	571.396	803.009	782.565	812.328	790.363	759.691	854.754	984.206
A0A0H2ZSK8	660.096	599.215	801.387	590.494	839.971	767.906	825.635	732.524	793.547	832.622	752.623	841.606	774.471	814.312	761.86	799.06	781.539	1072.01	629.655	695.941	803.939	779.079	813.085	797.114	794.392	780.46	926.772
A0A0H2ZSK9	699.814	761.91	643.213	526.545	821.838	657.621	909.058	722.613	884.886	764.521	812.272	728.315	765.351	820.52	721.892	822.362	716.24	1229	730.862	584.879	739.73	815.835	824.704	770.294	792.935	772.127	972.62
A0A0H2ZSL0	681.266	580.976	537.925	430.331	833.028	724.578	884.157	752.712	919.577	799.92	921.167	783.204	741.296	691.494	726.504	803.926	689.84	1495.11	631.121	484.128	778.803	818.435	859.748	852.186	716.395	765.215	1092.48
A0A0H2ZSL2	615.166	642.413	728.567	734.566	855.688	838.616	763.845	772.807	776.29	807.18	813.778	844.53	809.615	807.314	758.983	820.658	819.028	786.319	628.79	731.567	847.152	768.326	791.735	829.154	808.465	789.821	802.673
A0A0H2ZSL3	1064.42	1106.87	803.85	680.51	363.32	435.409	454.891	496.958	435.843	514.434	403.625	482.723	1254.79	1047.21	1126.07	900.274	1020.99	1259.98	1085.64	742.18	399.365	475.924	475.139	443.174	1151	1013.17	1140.48
A0A0H2ZSL5	772.047	710.157	558.714	563.747	635.015	457.529	837.511	866.823	596.945	589.215	893.693	650.761	777.306	1121.26	917.767	1164.49	908.977	689.759	741.102	561.231	546.272	852.167	593.08	772.227	949.282	1041.13	799.368
A0A0H2ZSL6	641.974	629.22	568.367	684.416	868.129	807.807	821.801	816.983	847.69	801.542	755.115	693.709	795.597	805.504	737.757	891.518	885.199	891.563	635.597	626.392	837.968	819.392	824.616	724.412	800.551	814.638	888.381
A0A0H2ZSL9	735.53	442.837	640.073	585.708	596.958	610.154	649.991	578.853	646.185	532.65	787.462	575.571	840.641	599.821	1031.7	706.112	953.644	2421.84	589.184	612.891	603.556	614.422	589.418	681.517	720.231	868.905	1687.74
A0A0H2ZSM2	629.751	588.941	688.926	595.047	835.125	779.973	879.449	733.528	787.964	855.001	820.563	812.414	765.552	819.075	783.986	808.432	769.03	1054.62	609.346	641.987	807.549	806.489	821.482	816.488	792.314	796.209	911.825
A0A0H2ZSM3	947.779	777.919	1142.24	1304.52	933.232	827.85	299.615	315.268	428.852	345.584	250.356	282.181	1003.79	798.362	1040.41	710.795	1017.67	1658.41	862.849	1223.38	880.541	307.441	387.218	266.269	901.074	875.601	1338.04
A0A0H2ZSM4	739.939	686.101	671.147	602.76	940.828	842.669	797.273	860.133	803.124	925.557	781.721	777.382	716.884	949.725	744.771	795.396	786.101	612.437	713.02	636.954	891.748	828.703	864.34	779.551	833.304	770.084	699.269
A0A0H2ZSM5	711.988	921.397	560.276	584.611	1039.04	1096.76	879.503	866.204	937.493	968.763	929.661	938.535	602.017	672.974	644.077	631.181	675.184	538.203	816.693	572.444	1067.9	872.854	953.128	934.098	637.495	637.629	606.694
A0A0H2ZSM6	1155.64	1469.33	759.241	919.808	618.601	692.56	887.749	931.567	747.514	908.955	785.151	942.449	656.067	652.251	788.394	591.71	678.53	151.176	1312.49	839.525	655.581	909.658	828.234	863.8	654.159	690.052	414.853
A0A0H2ZSM7	534.141	751.682	486.068	554.508	576.116	873.024	352.161	980.263	558.758	621.892	572.218	655.755	1101.01	1006.03	1374.69	1045.38	1183.96	437.089	642.912	520.288	724.57	666.212	590.325	613.987	1053.52	1210.04	810.525
A0A0H2ZSM9	1388.07	1670.23	1153.13	949.575	1021.23	809.309	1058.55	840.932	916.591	941.237	938.381	888.5	257.423	482.011	302.28	402.449	304.089	403.333	1529.15	1051.35	915.271	949.743	928.914	913.44	369.717	352.365	353.711
A0A0H2ZSN0	281.696	1002.11	953.671	721.207	495.424	722.434	191.922	919.923	262.812	595.008	389.26	703.758	1607.37	973.393	983.116	1000.71	1529.86	318.866	641.904	837.439	608.929	555.922	428.91	546.509	1290.38	991.911	924.363
A0A0H2ZSN2	797.63	652.055	830.934	578.619	876.421	842.769	871.777	755.123	784.277	870.691	833.525	832.219	709.874	714.577	724.469	742.296	618.938	1118.3	724.842	704.776	859.595	813.45	827.484	832.872	712.226	733.382	868.619
A0A0H2ZSN4	769.07	851.302	712.216	786.047	869.132	932.157	778.908	884.928	804.972	853.849	840.866	918.21	705.545	716.345	746.609	675.874	755.694	548.164	810.186	749.132	900.645	831.918	829.411	879.538	710.945	711.242	651.929
A0A0H2ZSN5	850.552	221.597	961.95	400.325	849.295	328.226	536.28	160.774	723.787	397.66	490.503	374.236	800.552	363.525	566.997	790.06	1216.91	3946.05	536.074	681.137	588.761	348.527	560.724	432.369	582.038	678.529	2581.48
A0A0H2ZSN6	634.878	631.006	736.256	628.037	784.317	831.233	899.717	867.365	889.193	1082.63	924.347	979.916	638.508	791.444	709.272	707.673	754.676	617.201	632.942	682.146	807.775	883.541	985.912	952.132	714.976	708.472	685.938
A0A0H2ZSN7	915.645	940.022	1477.42	1025.38	592.589	634.787	764.423	840.089	736.503	770.579	675.694	702.683	627.201	675.016	755.343	787.015	654.785	731.59	927.834	1251.4	613.688	802.256	753.541	689.188	651.108	771.179	693.187
A0A0H2ZSN8	996.274	877.141	955.642	773.95	1044.44	1003.09	533.54	876.747	666.913	977.256	663.532	933.624	703.352	645.073	732.782	602.496	782.313	540.15	936.708	864.796	1023.76	705.144	822.084	798.578	674.212	667.639	661.232
A0A0H2ZSN9	769.135	631.178	843.484	719.357	627.375	577.532	791.852	605.54	711.35	673.49	715.115	640.987	879.202	788.07	885.058	769.741	767.574	1620.13	700.156	781.421	602.453	698.696	692.42	678.051	833.636	827.4	1193.85
A0A0H2ZSP0	674.655	1089.53	1255.5	980.198	711.494	720.793	863.61	831.467	712.285	815.878	836.686	793.987	648.135	613.705	748.143	549.324	656.164	837.979	882.091	1117.85	716.143	847.539	764.081	815.337	630.92	648.733	747.072
A0A0H2ZSP2	1483.12	1354.49	1129.6	800.611	789.18	811.07	743.526	764.159	749.907	856.064	722.062	888.038	584.545	629.762	535.717	640.473	512.819	480.077	1418.81	965.106	800.125	753.842	802.986	805.05	607.154	588.095	496.448
A0A0H2ZSP3	1949.41	1298.31	867.582	1577.48	564.693	490.182	549.662	596.897	614.622	326.04	725.317	386.669	720.507	635.857	570.857	1108.49	627.718	533.486	1623.86	1222.53	527.437	573.279	470.331	555.993	678.182	839.673	580.602
A0A0H2ZSP4	748.496	1076.91	847.577	794.909	757.469	818.465	760.994	809.148	822.865	791.442	786.608	745.24	705.113	857.046	745.625	699.786	822.039	530.2	912.703	821.243	787.967	785.071	807.153	765.924	781.079	722.706	676.12
A0A0H2ZSP5	1458.55	1297.45	1138.65	1090.96	712.072	745.248	761.66	797.5	748.544	815.857	693.209	784.363	578.339	511.211	610.041	516.29	543.72	726.854	1378	1114.8	728.66	779.58	782.2	738.786	544.775	563.165	635.287
A0A0H2ZSP6	769.701	668.424	776.197	746.078	827.142	758.442	829.137	776.21	803.155	808.267	784.38	787.895	739.738	786.266	737.038	795.361	741.509	936.669	719.062	761.137	792.792	802.674	805.711	786.138	763.002	766.199	839.089
A0A0H2ZSP7	960.039	717.337	524.347	1038.45	763.747	657	555.597	555.181	631.925	407.287	756.044	477.694	996.588	774.231	770.549	1143.61	928.581	1101.69	838.688	781.399	710.373	555.389	519.606	616.869	885.41	957.08	1015.13
A0A0H2ZSP8	1085.22	824.276	975.182	777.956	674.519	693.153	741.462	716.881	721.746	770.796	690.911	698.302	727.871	727.859	713.299	751.002	761.937	1130.8	954.75	876.569	683.836	729.172	746.271	694.607	727.865	732.15	946.368
A0A0H2ZSP9	904.886	1503.98	413.099	548.379	400.254	500.769	627.643	637.438	740.943	622.222	702.277	679.903	1002.7	916.63	902.658	862.841	1118.99	756.593	1204.43	480.739	450.512	632.54	681.583	691.09	959.664	882.75	937.792
A0A0H2ZSQ0	503.647	696.424	491.754	744.814	563.487	588.327	1142.44	853.174	849.927	914.658	736.48	667.686	1109.55	982.708	814.81	536.877	683.985	1136.36	600.035	618.284	575.907	997.807	882.293	702.083	1046.13	675.843	910.174
A0A0H2ZSQ2	699.253	792.391	882.854	932.107	780.367	826.631	738.372	822.476	789.155	868.912	706.771	902.595	828.427	876.274	789.805	661.896	783.524	442.402	745.822	907.48	803.499	780.424	829.033	804.683	852.35	725.85	612.963
A0A0H2ZSQ3	1062.19	1072.84	1249.53	995.679	678.245	740.296	775.382	829.628	771.05	799.548	799.899	795.148	584.635	599.126	642.275	590.143	611.608	796.809	1067.52	1122.61	709.271	802.505	785.299	797.523	591.88	616.209	704.208
A0A0H2ZSQ5	633.728	832.687	748.793	833.415	763.707	562.331	568.982	742.788	668.241	513.278	709.843	537.534	1055.25	893.738	877.764	1443.26	866.632	403.037	733.207	791.104	663.019	655.885	590.76	623.688	974.496	1160.51	634.834
A0A0H2ZSQ6	786.064	715.243	742.873	643.815	668.538	676.635	811.783	811.834	853.224	780.364	881.833	816.411	816.417	757.591	754.435	779.237	659.222	1090.89	750.653	693.344	672.587	811.808	816.794	849.122	787.004	766.836	875.058
A0A0H2ZSQ8	548.544	713.178	659.904	704.926	623.916	789.513	582.951	781.539	618.305	642.851	679.835	745.488	940.472	925.435	1037.62	900.662	1136.51	778.008	630.861	682.415	706.715	682.245	630.578	712.662	932.954	969.143	957.26
A0A0H2ZSR1	825.063	778.289	1212.24	1204.27	743.654	764.544	774.822	760.507	749.971	843.798	712.418	850.562	678.027	715.843	723.023	635.038	703.095	607.5	801.676	1208.26	754.099	767.664	796.884	781.49	696.935	679.031	655.298
A0A0H2ZSR2	773.295	459.527	552.865	427.572	638.764	527.558	718.731	543.099	717.765	712.129	838.088	622.387	840.867	795.389	903.489	774.186	899.559	2137.21	616.411	490.218	583.161	630.915	714.947	730.237	818.128	838.838	1518.39
A0A0H2ZSR3	696.583	945.327	629.464	847.277	666.145	837.672	640.398	887.058	752.917	732.503	811.869	823.001	871.258	783.037	903.526	751.348	906.272	504.229	820.955	738.371	751.908	763.728	742.71	817.435	827.147	827.437	705.251
A0A0H2ZSR4	1165.34	929.334	606.768	696.051	942.054	772.976	977.154	796.651	1103.51	804.748	1008.63	755.506	457.054	687.864	469.066	803.664	387.392	857.005	1047.34	651.409	857.515	886.903	954.13	882.067	572.459	636.365	622.198
A0A0H2ZSR5	773.326	624.826	697.142	600.868	851.484	698.072	783.595	648.887	717.295	693.656	690.136	679.843	826.379	819.104	832.209	823.96	809.661	1422.3	699.076	649.005	774.778	716.241	705.475	684.99	822.742	828.084	1115.98
A0A0H2ZSR7	926.47	1839.11	1060.17	1053.09	876.947	1229.05	374.451	593.863	297.525	465.087	518.09	609.193	974.086	670.357	956.614	559.093	1024.02	240.612	1382.79	1056.63	1053	484.157	381.306	563.642	822.221	757.853	632.314
A0A0H2ZSR8	1077.69	1059.44	947.208	958.037	721.819	796.343	821.743	787.205	837.512	786.332	829.079	766.65	632.85	660.05	631.711	626.515	611.604	749.541	1068.56	952.623	759.081	804.474	811.922	797.865	646.45	629.113	680.572
A0A0H2ZSR9	1502.52	1592.04	784.881	998.289	489.35	475.963	550.38	776.509	608.19	548.043	788.656	643.775	841.365	785.65	816.605	804.112	676.494	467.093	1547.28	891.585	482.657	663.445	578.117	716.216	813.507	810.358	571.793
A0A0H2ZSS0	707.225	572.359	765.033	552.566	839.093	738.034	781.694	623.788	751.067	634.365	720.555	628.063	800.163	804.835	845.558	802.257	776.267	1653.99	639.792	658.8	788.564	702.741	692.716	674.309	802.499	823.908	1215.13
A0A0H2ZSS1	700.431	689.008	902.77	913.623	725.127	683.405	699.761	718.982	734.178	765.511	700.574	729.607	901.998	815.52	889.673	765.955	736.432	976.041	694.719	908.196	704.266	709.371	749.845	715.09	858.759	827.814	856.236
A0A0H2ZSS2	1501.37	997.275	987.289	1262.14	735.955	651.303	591.799	547.453	611.534	350.127	940.811	391.477	655.699	769.163	560.56	923.895	560.367	1079.95	1249.32	1124.72	693.629	569.626	480.831	666.144	712.431	742.227	820.16
A0A0H2ZSS3	620.976	733.159	693.284	612.842	605.693	546.065	624.964	713.687	685.211	470.546	636.503	367.412	1188.79	870.573	1062.19	1684.57	764.608	653.968	677.068	653.063	575.879	669.326	577.879	501.958	1029.68	1373.38	709.288
A0A0H2ZSS4	897.903	936.961	951.619	733.637	765.315	872.111	806.23	841.929	839.641	909.676	813.615	885.519	667.117	719.852	704.718	666.604	632.561	607.929	917.432	842.628	818.713	824.079	874.659	849.567	693.484	685.661	620.245
A0A0H2ZSS5	406.501	716.876	337.898	744.122	809.751	753.929	679.255	754.066	891.369	963.423	785.347	886.818	962.849	770.663	833.372	852.426	1051.69	626.058	561.689	541.01	781.84	716.66	927.396	836.083	866.756	842.899	838.875
A0A0H2ZSS6	826.816	789.817	687.13	732.89	736.815	778.97	778.74	855.383	881.293	868.488	830.164	822.115	712.709	843.281	779.191	765.085	745.183	631.138	808.316	710.01	757.893	817.061	874.89	826.139	777.995	772.138	688.16
A0A0H2ZSS7	1277.92	1082.59	1137.53	1036.9	707.409	726.425	779.71	811.451	798.475	875.698	757.748	868.718	554.884	617.708	605.807	599.272	584.089	603.218	1180.25	1087.22	716.917	795.581	837.087	813.233	586.296	602.54	593.653
A0A0H2ZSS8	1281.37	1319.64	1178.84	831.493	823.479	829.093	747.783	819.699	667.453	786.46	634.964	769.934	637.301	680.832	621.155	682.997	629.528	469.399	1300.5	1005.17	826.286	783.741	726.956	702.449	659.067	652.076	549.463
A0A0H2ZSS9	686.805	710.701	913.664	685.792	813.836	885.406	748.311	760.451	725.38	687.828	731.949	724.62	793.274	864.539	778.144	962.911	812.134	698.487	698.753	799.728	849.621	754.381	706.604	728.284	828.907	870.527	755.311
A0A0H2ZST1	591.976	375.804	362.319	16.9698	466.024	441.299	627.311	494.084	819.953	962.794	874.496	683.635	1506.96	446.17	684.387	1383.56	785.294	2049.62	483.89	189.644	453.662	560.698	891.374	779.065	976.566	1033.98	1417.46
A0A0H2ZST2	982.413	905.142	790.103	857.206	1128.44	950.709	946.563	941.683	1013.62	995.921	995.495	921.343	402.548	620.611	450.633	572.311	430.856	486.938	943.778	823.654	1039.58	944.123	1004.77	958.419	511.579	511.472	458.897
A0A0H2ZST4	512.489	702.73	732.868	675.067	797.443	909.989	840.933	875.594	743.197	1006.96	781.791	875.769	773.761	834.618	858.135	705.067	888.877	544.24	607.609	703.967	853.716	858.264	875.078	828.78	804.19	781.601	716.559
A0A0H2ZST7	1385.34	1038.52	896.76	1230.72	671.318	552.907	500.486	602.245	712.376	440.94	821.375	457.697	801.396	777.989	614.519	996.288	670.56	858.529	1211.93	1063.74	612.113	551.365	576.658	639.536	789.692	805.403	764.544
A0A0H2ZST8	285.672	327.049	427.277	397.417	598.696	590.804	823.649	860.618	913.829	871.083	813.762	810.598	947.177	859.456	1034.49	800.125	928.646	1494.89	306.36	412.347	594.75	842.133	892.456	812.18	903.316	917.308	1211.77
A0A0H2ZST9	1035.8	684.777	995.155	545.461	564.463	410.281	944.662	752.784	739.891	878.496	965.72	545.153	632.672	542.91	714.77	959.935	516.452	1706.83	860.287	770.308	487.372	848.723	809.194	755.436	587.791	837.352	1111.64
A0A0H2ZSU0	728.973	732.645	820.416	739.23	782.11	786.749	815.65	805.73	824.576	843.905	791.467	827.808	737.84	746.382	749.549	791.668	752.136	813.66	730.809	779.823	784.429	810.69	834.241	809.638	742.111	770.609	782.898
A0A0H2ZSU1	1024.75	709.048	817.443	815.699	592.311	513.839	506.161	578.808	712.217	538.929	754.556	672.191	944.924	989.69	763.432	1375.49	843.561	555.04	866.899	816.571	553.075	542.485	625.573	713.374	967.307	1069.46	699.3
A0A0H2ZSU2	1248.98	1418.78	1216.04	1672.94	693.756	596.478	600.398	728.955	697.372	532.918	538.056	644.609	776.689	598.773	650.956	650.713	752.204	344.162	1333.88	1444.49	645.117	664.676	615.145	591.333	687.731	650.835	548.183
A0A0H2ZSU4	449.73	424.082	610.511	515.736	630.019	587.509	727.807	663.466	714.672	690.281	694.454	691.064	1115.94	969.404	965.705	930.777	921.58	1442.52	436.906	563.124	608.764	695.636	702.477	692.759	1042.67	948.241	1182.05
A0A0H2ZSU5	421.192	519.08	598.537	594.458	801.329	774.275	893.283	795.672	773.481	808.112	778.998	871.627	839.367	974.867	872.65	808.996	904.387	861.042	470.136	596.497	787.802	844.478	790.797	825.313	907.117	840.823	882.715
A0A0H2ZSU7	750.347	685.131	759.72	678.675	696.321	671.755	979.863	982.559	1023.05	1118.84	943.183	1051.28	651.174	673	610.894	611.368	602.931	732.089	717.739	719.197	684.038	981.211	1070.95	997.23	662.087	611.131	667.51
A0A0H2ZSU8	561.628	410.189	667.34	388.585	791.656	629.541	702.156	604.319	732.498	686.081	751.703	712.929	947.017	751.059	878.731	743.944	858.858	2098.82	485.908	527.962	710.599	653.238	709.29	732.316	849.038	811.337	1478.84
A0A0H2ZSU9	486.66	750.727	656.297	757.918	713.133	784.827	531.607	678.838	577.095	493.504	633.202	684.104	1057.12	823.101	979.238	879.458	1172.24	1137.38	618.693	707.107	748.98	605.223	535.3	658.653	940.109	929.348	1154.81
A0A0H2ZSV0	1955.62	1979.8	849.832	646.843	637.573	436.497	711.558	541.839	677.766	773.612	773.721	687.915	570.742	763.612	648.376	725.581	428.724	604.854	1967.71	748.338	537.035	626.698	725.689	730.818	667.177	686.978	516.789
A0A0H2ZSV1	735.13	838.221	641.651	712.734	831.79	976.239	672.26	929.319	760.46	803.029	880.137	871.079	819.486	832.767	763.027	794.176	811.808	337.741	786.675	677.193	904.015	800.789	781.744	875.608	826.127	778.601	574.774
A0A0H2ZSV2	961.67	661.326	669.338	650.852	967.586	788.863	571.667	595.223	758.393	604.447	682.827	642.15	811.216	847.106	793.415	1119.45	777.604	983.405	811.498	660.095	878.224	583.445	681.42	662.488	829.161	956.432	880.504
A0A0H2ZSV4	3159.86	1606.7	767.773	946.992	692.501	913.17	645.358	769.527	526.325	818.309	540.81	708.653	375.61	559.568	424.473	471.64	368.446	529.558	2383.28	857.383	802.835	707.443	672.317	624.731	467.589	448.056	449.002
A0A0H2ZSV5	1050.98	779.919	779.851	795.371	847.802	731.55	751.008	727.726	826.2	723.708	751.018	732.23	665.234	808.421	688.275	934.157	705.25	769.217	915.452	787.611	789.676	739.367	774.954	741.624	736.827	811.216	737.234
A0A0H2ZSV6	1018.02	620.676	731.62	756.908	719.612	664.858	804.7	668.598	988.948	699.509	771.722	694.616	668.682	829.241	640.44	794.537	700.331	1293.72	819.347	744.264	692.235	736.649	844.229	733.169	748.961	717.489	997.026
A0A0H2ZSV8	769.544	849.26	810.986	843.975	1056.55	1004.52	757.597	887.907	810.032	897.589	752.364	826.725	715.946	725.308	665.233	653.455	700.869	492.837	809.402	827.481	1030.53	822.752	853.81	789.544	720.627	659.344	596.853
A0A0H2ZSW1	800.488	667.219	481.038	517.732	812.4	807.438	672.213	762.579	772.557	747.475	827.786	734.149	806.749	1102.68	878.338	929.097	842.603	669.455	733.853	499.385	809.919	717.396	760.016	780.968	954.716	903.718	756.029
A0A0H2ZSW2	945.29	900.165	720.106	688.793	825.73	823.949	867.361	844.298	853.593	830.88	854.729	856.721	654.423	720.194	691.498	732.363	631.953	735.767	922.727	704.45	824.839	855.829	842.236	855.725	687.309	711.93	683.86
A0A0H2ZSW5	838.158	734.533	1285.89	1224.32	366.648	416.211	1294.74	1151.07	1177.95	1299.84	848.504	899.988	489.318	508.128	535.694	508.556	392.535	557.049	786.346	1255.1	391.43	1222.91	1238.9	874.246	498.723	522.125	474.792
A0A0H2ZSX1	631.958	676.373	576.34	579.798	909.849	905.965	1063.66	1088.4	1162.94	1163.51	1118.76	1118.3	509.182	542.903	509.624	562.851	508.147	639.549	654.165	578.069	907.907	1076.03	1163.22	1118.53	526.042	536.237	573.848
A0A0H2ZSX2	936.915	892.093	649.551	660.63	656.232	812.707	811.712	946.652	779.165	916.253	784.657	904.81	856.406	761.302	802.234	713.264	704.941	539.238	914.504	655.09	734.469	879.182	847.709	844.734	808.854	757.749	622.089
A0A0H2ZSX3	675.097	734.37	913.443	754.591	861.263	866.856	806.401	741.47	695.326	891.821	683.239	857.618	711.542	743.369	839.968	713.525	840.316	821.717	704.733	834.017	864.06	773.936	793.573	770.428	727.456	776.747	831.016
A0A0H2ZSX4	762.323	723.32	881.416	744.948	823.12	732.923	784.191	751.784	771.052	801.062	726.223	771.582	745.696	745.432	714.886	754.086	812.952	1062.33	742.821	813.182	778.021	767.988	786.057	748.903	745.564	734.486	937.639
A0A0H2ZSX5	586.828	712.147	615.204	606.329	1110.54	1077.36	887.475	965.629	1004.88	1110.87	961.521	1044.35	615.534	637.923	603.081	626.833	597.444	452.419	649.488	610.766	1093.95	926.552	1057.87	1002.94	626.728	614.957	524.931
A0A0H2ZSX6	748.212	692.965	736.103	610.332	1114.74	970.404	919.508	886.596	872.917	830.116	806.014	842.517	632.301	802.205	655.01	843.727	580.668	589.315	720.589	673.217	1042.57	903.052	851.517	824.265	717.253	749.368	584.991
A0A0H2ZSX8	1548.5	1091.44	1181.51	902.154	696.049	677.835	779.186	727.214	786.226	767.775	702.303	677.252	553.818	591.121	525.832	657.438	504.577	1085.86	1319.97	1041.83	686.942	753.2	777	689.778	572.469	591.635	795.22
A0A0H2ZSX9	979.685	969.979	826.737	792.557	834.821	740.981	860.307	770.98	905.642	780.057	884.263	770.23	626.143	635.315	555.052	680.095	604.653	1019.19	974.832	809.647	787.901	815.644	842.849	827.247	630.729	617.573	811.921
A0A0H2ZSY0	681.614	195.367	1559.12	1862.41	215.379	231.17	291.215	221.001	348.018	212.053	341.187	178.69	1347.99	422.161	1365.11	346.576	863.654	3458.7	438.49	1710.76	223.274	256.108	280.036	259.939	885.074	855.843	2161.18
A0A0H2ZSY1	365.327	320.879	572.229	642.083	616.569	418.776	628.262	555.179	617.154	412.6	636.945	441.887	827.765	1271.8	1085.04	1419.66	1415.31	1124.74	343.103	607.156	517.672	591.72	514.877	539.416	1049.78	1252.35	1270.03
A0A0H2ZSY2	549.921	597.718	650.955	664.586	884.996	745.211	802.655	748.06	887.277	814.567	745.288	822.013	800.14	816.551	787.926	815.536	823.403	1016.98	573.82	657.77	815.104	775.358	850.922	783.65	808.345	801.731	920.192
A0A0H2ZSY3	644.687	763.875	666.292	800.48	766.199	915.785	778.339	769.922	728.146	750.691	757.627	705.416	841.134	798.209	868.146	759.077	872.8	822.093	704.281	733.386	840.992	774.13	739.418	731.522	819.671	813.612	847.447
A0A0H2ZSY4	857.087	1007.9	849.136	879.538	815.593	987.768	656.182	741.686	745.742	837.847	584.397	952.75	909.888	454.65	771.264	575.973	823.837	829.767	932.495	864.337	901.681	698.934	791.794	768.573	682.269	673.618	826.802
A0A0H2ZSY5	613.61	822.882	588.631	576.22	971.902	931.233	770.373	826.754	870.734	765.465	827.453	852.886	830.671	757.432	750.454	767.472	708.124	802.434	718.246	582.425	951.567	798.564	818.099	840.17	794.052	758.963	755.279
A0A0H2ZSY6	1128.51	1036.65	1179	1133.93	684.609	851.203	506.075	870.421	657.202	841.775	635.612	788.587	778.676	636.513	700.439	626.062	833.977	427.288	1082.58	1156.46	767.906	688.248	749.489	712.099	707.594	663.251	630.632
A0A0H2ZSY8	2130.04	2175.62	2050.98	1370.58	434.417	492.985	539.071	580.384	514.293	603.746	547.717	546.986	438.932	477.838	453.365	466.8	446.646	614.387	2152.83	1710.78	463.701	559.727	559.019	547.352	458.385	460.083	530.516
A0A0H2ZSZ0	853.393	739.695	611.067	774.287	805.935	937.89	730.07	864.726	833.163	759.506	812.951	812.214	800.4	737.247	783.304	680.763	729.057	830.082	796.544	692.677	871.913	797.398	796.335	812.582	768.824	732.033	779.57
A0A0H2ZSZ2	580.157	594.201	488.16	525.362	724.227	705.351	638.38	868.293	776.538	854.799	800.259	873.037	973.577	973.931	854.978	937.184	976.942	639.188	587.179	506.761	714.789	753.337	815.668	836.648	973.754	896.081	808.065
A0A0H2ZSZ3	655.948	754.822	1036.34	828.653	759.077	789.559	750.389	712.692	691.4	771.212	659.486	752.868	808.953	805.929	822.031	751.826	842.462	909.85	705.385	932.497	774.318	731.541	731.306	706.177	807.441	786.928	876.156
A0A0H2ZSZ5	668.64	779.977	878.444	934.46	753.606	891.429	583.427	864.492	628.811	696.989	642.377	807.463	966.91	832.252	886.266	790.914	931.755	473.85	724.308	906.452	822.517	723.959	662.9	724.92	899.581	838.59	702.803
A0A0H2ZSZ6	255.429	1910.56	480.171	942.309	299.885	1015.61	110.579	389.306	66.6791	225.753	98.6118	244.865	1814.46	1596.02	1812.17	524.754	1622.23	166.855	1082.99	711.24	657.747	249.943	146.216	171.738	1705.24	1168.46	894.543
A0A0H2ZSZ7	710.791	442.353	720.79	460.783	581.202	766.013	721.296	1065.98	645.794	1188.44	751.44	1057.41	882.233	659.92	982.624	1091.18	915.321	293.782	576.572	590.787	673.608	893.636	917.116	904.426	771.077	1036.9	604.552
A0A0H2ZSZ8	860.979	807.826	1420.85	1482.14	615.56	617.091	804.294	734.592	677.978	739.756	571.833	636.628	793.997	721.557	833.683	638.85	609.451	756.964	834.403	1451.5	616.325	769.443	708.867	604.231	757.777	736.266	683.207
A0A0H2ZT00	284.631	644.789	1391.28	653.146	760.156	874.722	824.014	744.912	649.696	782.61	714.442	847.069	834.18	877.875	805.082	780.485	785.924	845.591	464.71	1022.21	817.439	784.463	716.153	780.756	856.028	792.784	815.757
A0A0H2ZT02	630.071	725.139	832.535	875.765	776.083	848.004	800.725	749.206	733.364	843.071	744.335	882.865	774.684	815.912	793.997	727.779	884.615	632.962	677.605	854.15	812.043	774.965	788.218	813.6	795.298	760.888	758.788
A0A0H2ZT04	949.785	827.188	817.469	741.012	530.459	423.69	367.347	659.302	511.128	786.452	910.382	695.993	1057.03	1141.65	686.234	1134.67	1028.24	431.234	888.487	779.24	477.074	513.324	648.79	803.188	1099.34	910.451	729.737
A0A0H2ZT05	3476.05	4121.58	2581.59	1486.52	270.352	212.32	260.203	357.639	244.161	357.658	273.289	222.317	278.576	324.306	270.871	281.37	274.499	164.758	3798.82	2034.06	241.336	308.921	300.91	247.803	301.441	276.121	219.629
A0A0H2ZT06	850.803	584.564	510.032	423.881	965.969	644.918	951.399	581.485	1010.59	536.171	961.668	588.092	635.851	794.824	565.821	1240.98	552.259	1433.28	717.684	466.957	805.443	766.442	773.383	774.88	715.337	903.401	992.769
A0A0H2ZT07	783.065	753.914	693.418	524.819	451.764	421.117	1030.05	836.25	1112.12	935.237	1026.3	931.834	665.381	771.294	604.392	797.823	612.206	1095.28	768.489	609.118	436.44	933.152	1023.68	979.068	718.337	701.108	853.743
A0A0H2ZT10	774.091	661.91	767.785	656.432	755.539	731.766	782.553	715.687	742.36	779.077	765.1	744.815	785.285	784.618	803.101	780.348	806.292	1202.4	718.001	712.108	743.652	749.12	760.718	754.958	784.952	791.724	1004.35
A0A0H2ZT12	577.391	384.713	1085.52	1021.59	940.408	1162.29	1029.46	1670.64	841.69	1116.37	997.416	1299.03	531.397	256.364	574.803	278.83	526.122	291.048	481.052	1053.55	1051.35	1350.05	979.028	1148.22	393.881	426.817	408.585
A0A0H2ZT14	413.435	716.392	795.706	938.568	756.592	974.842	641.543	932.331	668.482	891.181	779.55	956.448	817.974	953.494	905.003	509.297	1083.79	308.201	564.914	867.137	865.717	786.937	779.832	867.999	885.734	707.15	695.994
A0A0H2ZT15	1331.29	268.294	445.575	434.422	348.696	664.819	856.106	652.059	558.992	683.526	863.031	693.883	989.368	710.593	1030.74	723.455	550.138	2203.81	799.791	439.998	506.757	754.083	621.259	778.457	849.981	877.096	1376.97
A0A0H2ZT17	680.944	685.33	672.732	670.298	704.587	721.061	529.645	734.824	686.339	585.705	784.283	675.831	976.395	943.174	908.292	1265.99	919.683	541.898	683.137	671.515	712.824	632.235	636.022	730.057	959.785	1087.14	730.79
A0A0H2ZT18	601.241	659.321	617.25	675.49	909.751	893.441	809.424	827.813	953.958	928.927	780.528	982.374	742.142	792.758	730.654	736.781	797.194	616.779	630.281	646.37	901.596	818.619	941.443	881.451	767.45	733.718	706.987
A0A0H2ZT19	360.882	748.424	473.09	891.311	623.092	947.349	454.89	891.948	580.392	693.232	571.303	848.809	1197.56	899.965	1050.24	818.519	1379.24	310.865	554.653	682.2	785.22	673.419	636.812	710.056	1048.76	934.38	845.053
A0A0H2ZT20	549.861	668.262	580.865	617.197	711.905	962.045	697.719	913.169	819.693	910.234	876.069	956.089	837.37	786.772	925.111	753.741	857.346	548.379	609.061	599.031	836.975	805.444	864.963	916.079	812.071	839.426	702.863
A0A0H2ZT21	719.518	924.478	632.018	1427.53	591.52	702.58	513.894	647.793	554.588	558.276	598.333	703.968	1076.63	830.876	1021.29	798.905	1128.32	450.421	821.998	1029.77	647.05	580.844	556.432	651.15	953.752	910.099	789.372
A0A0H2ZT22	828.612	952.231	923.305	859.142	976.494	908.426	618.963	750.631	635.887	774.611	632.449	790.895	797.185	836.32	780.506	698.071	842.128	550.32	890.422	891.224	942.46	684.797	705.249	711.672	816.753	739.288	696.224
A0A0H2ZT24	1927.59	2059.89	1868.16	1212.05	414.212	429.105	632.272	721.004	591.147	783.576	618.588	731.186	480.26	433.913	515.838	411.849	430.873	593.278	1993.74	1540.1	421.659	676.638	687.362	674.887	457.086	463.844	512.075
A0A0H2ZT26	1580.27	1786.24	851.667	776.603	607.316	558.788	1140.09	935.205	967.62	957.871	659.601	720.519	550.645	579.582	484.562	497.258	431.428	512.207	1683.25	814.135	583.052	1037.65	962.745	690.06	565.114	490.91	471.817
A0A0H2ZT29	704.29	564.363	762.79	621.644	724.377	675.939	726.457	636.491	682.264	700.194	681.813	734.505	943.048	840.369	878.283	810.213	844.33	1423.53	634.327	692.217	700.158	681.474	691.229	708.159	891.709	844.248	1133.93
A0A0H2ZT31	597.128	864.332	561.973	645.215	821.512	834.178	827.575	845.765	826.05	707.852	780.341	713.217	796.709	806.664	812.873	896.592	881.159	719.738	730.73	603.594	827.845	836.67	766.951	746.779	801.687	854.733	800.448
A0A0H2ZT32	1357.84	1227.01	1252.87	1022.73	872.456	808.315	738.886	716.714	700.958	778.153	637.783	674.09	553.992	578.118	588.594	573.219	568.495	856.925	1292.43	1137.8	840.386	727.8	739.555	655.936	566.055	580.907	712.71
A0A0H2ZT33	1757.63	1749.56	1904.65	1610.82	656.078	755.828	533.412	532.988	413.228	550.574	364.608	383.015	662.617	594.169	633.073	564.447	542.367	499.97	1753.6	1757.74	705.953	533.2	481.901	373.812	628.393	598.76	521.168
A0A0H2ZT34	807.043	1074.16	616.93	1112.43	604.804	835.593	448.705	877.987	647.78	725.185	628.896	1053.72	1046.4	762.481	796.407	560.455	1228.81	205.136	940.601	864.679	720.198	663.346	686.482	841.307	904.443	678.431	716.975
A0A0H2ZT35	1865.06	1487.62	1176.97	1111.81	592.477	638.028	684.379	922.034	835.959	856.749	834.164	918.177	436.509	418.543	441.347	543.1	442.347	424.905	1676.34	1144.39	615.252	803.206	846.354	876.171	427.526	492.223	433.626
A0A0H2ZT36	622.682	881.836	746.541	664.085	985.79	999.997	730.031	703.085	733.214	815.14	626.129	793.275	859.836	847.542	935.252	753.199	745.809	638.248	752.259	705.313	992.894	716.558	774.177	709.702	853.689	844.225	692.029
A0A0H2ZT37	671.242	635.692	731.795	622.99	947.313	943.975	676.362	850.279	706.377	614.952	875.943	869.851	728.169	997.725	801.13	984.874	808.343	422.762	653.467	677.392	945.644	763.321	660.665	872.897	862.947	893.002	615.552
A0A0H2ZT41	928.352	1123.27	749.693	1075.84	719.214	682.662	591.355	652.935	692.295	514.2	748.815	589.787	837.554	899.681	770.043	989.719	917.084	433.453	1025.81	912.766	700.938	622.145	603.248	669.301	868.618	879.881	675.268
A0A0H2ZT42	788.397	698.871	888.837	803.734	897.189	873.643	760.573	742.776	742.551	788.739	681.966	875.155	761.925	691.967	752.011	698.214	768.373	956.174	743.634	846.285	885.416	751.675	765.645	778.561	726.946	725.112	862.273
A0A0H2ZT43	1038	880.265	419.611	739.551	609.475	817.897	582.959	847.183	794.11	644.028	1101.44	772.734	757.578	783.326	793.016	962.761	767.066	563.029	959.13	579.581	713.686	715.071	719.069	937.088	770.452	877.889	665.047
A0A0H2ZT44	631.727	702.306	705.324	849.035	781.27	820.85	660.658	741.968	701.837	714.24	733.163	724.915	912.568	862.545	852.681	882.097	923.568	712.363	667.017	777.18	801.06	701.313	708.038	729.039	887.556	867.389	817.966
A0A0H2ZT46	301.986	469.909	340.671	312.715	800.053	891.357	569.133	820.42	762.205	754.258	662.312	596.347	1129.94	1051.52	983.029	850.309	1159.03	1216.47	385.947	326.693	845.705	694.776	758.232	629.33	1090.73	916.669	1187.75
A0A0H2ZT47	1315.7	973.795	990.855	892.152	649.159	562.93	842.002	641.947	817.511	699.121	788.356	673.26	613.625	582.516	595.838	648.301	560.275	1477.65	1144.75	941.503	606.045	741.974	758.316	730.808	598.07	622.07	1018.96
A0A0H2ZT48	791.06	785.019	670.302	650.427	928.398	866.322	928.241	867.556	986.839	907.732	919.628	920.51	597.685	643.533	614.821	694.353	591.422	832.093	788.039	660.364	897.36	897.898	947.285	920.069	620.609	654.587	711.758
A0A0H2ZT50	661.748	650.698	866.834	754.651	779.81	854.426	816.966	894.309	735.384	847.163	681.01	858.319	754.888	823.196	870.02	633.719	837.587	818.23	656.223	810.742	817.118	855.637	791.274	769.665	789.042	751.87	827.908
A0A0H2ZT51	963.918	1236.5	1226.62	811.352	709.325	819.485	646.457	760.849	621.926	849.59	647.889	870.373	810.224	727.188	746.087	662.982	743.623	446.826	1100.21	1018.98	764.405	703.653	735.758	759.131	768.706	704.534	595.225
A0A0H2ZT52	782.167	702.402	789.581	683.639	819.91	715.213	897.365	808.701	877.688	824.982	825.561	816.93	687.879	692.068	665.654	680.799	684.57	1204.43	742.284	736.61	767.561	853.033	851.335	821.246	689.974	673.227	944.499
A0A0H2ZT53	1330.85	1652.14	1088.04	1208.18	61.5286	185.124	514.608	906.183	751.88	719.37	868.199	876.688	886.124	764.456	924.551	633.3	618.804	235.938	1491.5	1148.11	123.326	710.396	735.625	872.444	825.29	778.925	427.371
A0A0H2ZT54	977.638	1137.51	686.697	953.513	878.995	793.368	773.149	520.281	861.547	327.826	835.181	348.727	553.082	1144.14	577.513	1239.35	872.105	324.059	1057.57	820.105	836.182	646.715	594.687	591.954	848.613	908.43	598.082
A0A0H2ZT55	480.398	538.964	690.609	936.549	628.237	670.878	580.139	599.984	577.412	582.322	574.237	551.015	1097.09	1011.32	1097.1	892.228	1101.35	1140.13	509.681	813.579	649.558	590.061	579.867	562.626	1054.2	994.664	1120.74
A0A0H2ZT56	632.385	1154.75	1712.74	777.906	781.684	737.086	668.098	766.561	684.038	764.229	700.137	635.147	769.94	787.128	643.675	756.499	601.742	729.339	893.568	1245.32	759.385	717.33	724.134	667.642	778.534	700.087	665.541
A0A0H2ZT59	482.604	700.924	513.347	711.778	705.956	844.213	481.892	716.987	514.226	505.891	627.375	733.855	1169.11	1138.53	1097.81	995.591	1162.54	537.29	591.764	612.562	775.085	599.439	510.058	680.615	1153.82	1046.7	849.914
A0A0H2ZT60	756.37	709.396	767.067	766.404	732.222	850.525	494.111	633.347	565.553	610.058	614.707	770.038	1100.83	949.078	947.225	1009.98	926.559	630.213	732.883	766.735	791.373	563.729	587.806	692.373	1024.95	978.605	778.386
A0A0H2ZT61	693.834	665.637	640.94	653.078	963.091	855.029	861.354	737.243	807.961	768.909	828.671	756.884	764.384	800.086	729.276	828.047	689.709	980.894	679.735	647.009	909.06	799.298	788.435	792.777	782.235	778.661	835.301
A0A0H2ZT62	444.086	740.173	456.923	1028.62	547.051	672.282	665.251	751.327	578.518	601.366	690.765	704.378	1041.02	661.041	1155.65	902.557	1172.49	966.927	592.129	742.772	609.667	708.289	589.942	697.572	851.028	1029.1	1069.71
A0A0H2ZT63	681.084	538.24	882.678	687.789	647.254	531.88	655.688	583.577	750.58	412.966	772.649	525.909	918.369	907.899	848.64	1430.82	792.488	1092.83	609.662	785.234	589.567	619.632	581.773	649.279	913.134	1139.73	942.661
A0A0H2ZT64	1431.55	1389.61	1413.62	1046.69	665.9	662.588	772.279	771.406	748.993	790.109	725.205	712.71	472.379	592.363	580.235	534.337	501.552	756.866	1410.58	1230.15	664.244	771.842	769.551	718.957	532.371	557.286	629.209
A0A0H2ZT66	2897.13	3559.92	1752.34	1504.76	247.449	228.648	383.209	477.741	356.313	430.964	350.709	497.902	591.795	310.582	456.018	250.095	543.829	259.343	3228.52	1628.55	238.048	430.475	393.639	424.305	451.188	353.057	401.586
A0A0H2ZT67	684.807	694.198	646.484	645.174	975.423	889.936	839.366	767.486	836.224	780.76	826.316	788.424	729.552	824.116	746.829	910.064	695.359	719.341	689.503	645.829	932.68	803.426	808.492	807.37	776.834	828.446	707.35
A0A0H2ZT68	942.968	869.652	803.445	799.731	1330.44	1325.43	709.289	711.075	860.732	683.596	879.458	703.005	534.367	584.79	537.008	570.19	513.175	979.273	906.31	801.588	1327.94	710.182	772.164	791.231	559.579	553.599	746.224
A0A0H2ZT69	601.225	588.279	565.522	576.154	865.216	795.363	794.716	744.722	833.29	777.953	789.262	786.717	890.136	816.258	793.222	921.343	775.902	991.368	594.752	570.838	830.289	769.719	805.621	787.989	853.197	857.282	883.635
A0A0H2ZT70	812.938	780.396	731.341	704.516	1114.83	1223.5	921.405	803.567	838.261	836.973	891.15	817.641	583.298	556.03	613.947	531.382	563.077	1002.8	796.667	717.928	1169.16	862.486	837.617	854.396	569.664	572.665	782.937
A0A0H2ZT71	1304.33	1009.02	1101.4	1005.01	977.885	870.858	576.319	565.186	584.554	766.757	572.981	703.421	693.188	602.837	664.95	659.15	712.779	991.425	1156.67	1053.21	924.371	570.753	675.656	638.201	648.013	662.05	852.102
A0A0H2ZT72	985.93	788.291	647.613	760.523	744.449	805.537	631.942	748.637	653.822	634.565	674.841	719.28	864.86	847.302	868.442	950.298	889.244	730.131	887.111	704.068	774.993	690.289	644.193	697.06	856.081	909.37	809.688
A0A0H2ZT73	655.401	721.715	760.018	731.818	795.819	794.749	776.578	764.571	748.684	762.208	734.296	785.314	840.741	799.525	821.383	786.195	825.939	919.062	688.558	745.918	795.284	770.574	755.446	759.805	820.133	803.789	872.5
A0A0H2ZT74	607.184	710.226	768.862	971.634	917.163	762.91	786.741	794.184	776.675	858.604	815.941	837.733	748.127	797.237	768.123	727.948	780.332	641.808	658.705	870.248	840.037	790.463	817.639	826.837	772.682	748.035	711.07
A0A0H2ZT75	721.099	722.82	613.321	770.71	722.681	908.559	556.812	734.556	605.681	627.544	676.272	815.096	1001.3	860.787	953.225	930.98	1012.41	620.742	721.96	692.015	815.62	645.684	616.612	745.684	931.041	942.102	816.575
A0A0H2ZT76	723.062	588.84	876.639	1090.81	958.15	835.583	778.678	653.866	777.9	724.474	747.105	673.305	675.131	714.062	710.664	707.689	786.278	1106.77	655.951	983.725	896.866	716.272	751.187	710.205	694.597	709.177	946.525
A0A0H2ZT78	941.764	703.09	757.585	679.314	812.003	713.006	839.138	739.016	891.398	777.97	818.752	733.699	644.02	669.209	673.151	707.709	671.043	1388.76	822.427	718.449	762.505	789.077	834.684	776.225	656.615	690.43	1029.9
A0A0H2ZT79	702.729	697.921	759.733	693.42	845.762	848.63	814.627	800.721	768.775	854.501	767.415	804.499	761.687	820.222	793.179	761.971	773.905	802.018	700.325	726.577	847.196	807.674	811.638	785.957	790.954	777.575	787.962
A0A0H2ZT80	1132.84	1009.16	1392.05	1273.87	640.265	623.278	561.442	670.327	739.638	564.821	587.767	557.328	667.919	784.252	592.304	937.498	859.662	579.859	1071	1332.96	631.771	615.884	652.229	572.548	726.085	764.901	719.76
A0A0H2ZT82	645.212	697.503	651.049	678.01	825.757	763.334	953.848	825.553	915.642	896.735	920.001	858.526	653.653	879.758	700.783	815.607	705.467	638.116	671.357	664.53	794.545	889.7	906.188	889.263	766.706	758.195	671.792
A0A0H2ZT85	513.582	546.861	480.301	412.871	1009.19	911.983	960.047	905.621	959.882	985.848	1002.95	1038.02	681.894	649.947	671.507	690.572	641.835	1018.88	530.222	446.586	960.586	932.834	972.865	1020.49	665.921	681.04	830.357
A0A0H2ZT86	614.983	657.198	618.176	615.139	985.204	892.467	775.198	727.938	751.563	800.916	725.207	717.039	880.89	931.258	772.218	886.838	812.541	770.773	636.09	616.658	938.835	751.568	776.24	721.123	906.074	829.528	791.657
A0A0H2ZT87	1059.97	972.995	850.849	939.845	513.061	542.608	892.419	801.489	901.168	904.956	946.99	801.023	690.553	574.559	661.906	536.18	546.019	1157.12	1016.48	895.347	527.835	846.954	903.062	874.006	632.556	599.043	851.57
A0A0H2ZT88	638.539	734.151	746.169	754.649	724.631	855.008	641.095	792.783	791.081	784.9	825.836	926.515	822.38	838.927	841.957	805.598	876.13	571.385	686.345	750.409	789.819	716.939	787.99	876.175	830.654	823.778	723.758
A0A0H2ZT89	258.171	797.184	528.854	784.414	730.612	853.31	496.79	915.426	642.07	727.036	590.005	738.214	1178.24	857.779	1150.96	941.247	1155.28	397.14	527.678	656.634	791.961	706.108	684.553	664.11	1018.01	1046.1	776.209
A0A0H2ZT90	1114.21	892.467	898.813	822.048	724.856	740.262	756.433	762.677	791.552	776.784	744.041	777.17	700.604	732.144	673.967	753.638	687.68	847.855	1003.34	860.431	732.559	759.555	784.168	760.605	716.374	713.802	767.768
A0A0H2ZT91	626.116	2150.71	2249.99	1404.43	388.46	562.775	388.872	765.861	323.681	798.61	366.587	735.732	918.775	508.916	840.881	237.869	1098.68	284.601	1388.41	1827.21	475.617	577.367	561.146	551.159	713.846	539.375	691.639
A0A0H2ZT93	711.799	793.627	896.915	829.868	984.137	908.82	865.752	814.318	823.336	741.853	826.461	785.344	679.445	698.936	656.638	703.917	617.467	856.873	752.713	863.392	946.479	840.035	782.595	805.902	689.191	680.277	737.17
A0A0H2ZT97	585.479	450.408	389.68	413.557	632.613	706.268	450.832	703.208	552.623	488.543	607.558	716.032	1194.22	949.827	917.093	1110.81	1375.93	1303.73	517.944	401.619	669.44	577.02	520.583	661.795	1072.02	1013.95	1339.83
A0A0H2ZT98	985.854	742.802	1095.19	845.325	896.579	919.565	827.6	757.022	840.714	780.144	798.694	865.816	580.787	711.156	562.778	758.164	572.968	730.614	864.328	970.259	908.072	792.311	810.429	832.255	645.971	660.471	651.791
A0A0H2ZT99	582.795	903.037	625.209	402.008	763.236	399.422	686.427	493.212	704.687	371.163	754.213	531.91	238.645	1501.31	868.251	1617.95	1631.03	304.735	742.916	513.609	581.329	589.82	537.925	643.062	869.977	1243.1	967.881
A0A0H2ZTA0	556.705	599.257	817.429	905.11	825.185	787.601	732.827	735.186	776.383	707.232	622.772	763.865	948.873	652.575	901.82	687.286	780.41	1277.87	577.981	861.27	806.393	734.007	741.807	693.319	800.724	794.553	1029.14
A0A0H2ZTA1	881.086	654.644	813.703	669.053	950.639	756.506	830.326	658.209	702.286	684.034	763.79	685.042	692.202	711.675	683.255	708.701	737.74	1556.3	767.865	741.378	853.572	744.268	693.16	724.416	701.939	695.978	1147.02
A0A0H2ZTA2	1276.51	1256.23	1130.86	906.35	693.728	647.916	858.139	903.946	854.658	908.588	795.783	807.914	553.623	608.131	552.469	578.049	502.305	629.526	1266.37	1018.6	670.822	881.043	881.623	801.849	580.877	565.259	565.915
A0A0H2ZTA3	610.999	432.413	594.363	510.958	564.359	477.528	723.116	565.738	602.21	515.826	607.966	538.33	1179.46	992.422	1065.83	1024.37	906.584	1780.73	521.706	552.661	520.943	644.427	559.018	573.148	1085.94	1045.1	1343.66
A0A0H2ZTA4	616.412	947.24	1108.31	1613.55	363.122	512.331	457.277	676.78	461.702	356.446	604.655	452.928	952.037	708.495	1155.91	986.81	1181.38	710.8	781.826	1360.93	437.726	567.028	409.074	528.792	830.266	1071.36	946.09
A0A0H2ZTA9	584.937	586.19	858.913	695.652	767.288	903.392	789.515	878.676	739.044	962.428	752.117	1028.25	763.03	731.862	902.951	744.079	817.181	596.38	585.563	777.282	835.34	834.096	850.736	890.182	747.446	823.515	706.78
A0A0H2ZTB0	812.887	908.534	657.937	813.051	969.956	982.683	799.202	896.109	905.712	867.334	925.704	936.733	670.671	594.51	607.96	601.658	646.95	630.968	860.71	735.494	976.319	847.655	886.523	931.218	632.59	604.809	638.959
A0A0H2ZTB1	541.273	952.34	493.669	1027.02	813.988	781.454	617.068	667.03	616.053	498.896	644.588	598.456	1008.42	836.328	973.259	1059.47	1105.71	519.059	746.807	760.344	797.721	642.049	557.475	621.522	922.372	1016.36	812.383
A0A0H2ZTB2	863.924	648.267	873.732	502.409	688.645	442.711	840.146	387.349	830.921	409.932	839.83	370.254	681.951	579.011	738.784	805.799	683.028	2847.93	756.096	688.07	565.678	613.747	620.427	605.042	630.481	772.292	1765.48
A0A0H2ZTB6	654.538	552.821	602.888	509.715	903.252	916.592	804.653	935.815	895.118	922.635	861.468	854.817	694.57	800.399	719.428	767.27	802.453	832.763	603.679	556.301	909.922	870.234	908.876	858.142	747.484	743.349	817.608
A0A0H2ZTB8	947.763	1044.27	840.388	976.202	778.571	940.164	441.36	722.861	602.343	678.754	625.42	725.221	932.172	870.035	861.6	743.484	936.576	393.759	996.016	908.295	859.368	582.11	640.549	675.321	901.104	802.542	665.168
A0A0H2ZTB9	567.718	1129.18	715.833	1021.53	615.564	714.976	515.692	686.368	580.833	502.6	641.87	620.873	1001.97	898.076	1001.86	1020.83	1184.34	359.58	848.45	868.679	665.27	601.03	541.717	631.372	950.023	1011.34	771.958
A0A0H2ZTC1	947.26	1108.89	1101.14	987.317	839.305	854.162	743.269	661.013	655.589	752.047	614.308	728.519	771.177	698.726	713.847	627.502	736.076	759.287	1028.08	1044.23	846.734	702.141	703.818	671.414	734.951	670.674	747.681
A0A0H2ZTC2	1065.51	812.813	1001.91	828.04	868.646	811.931	870.943	785.305	871.388	851.501	766.357	838.69	562.525	563.75	572.931	670.373	583.328	1018.6	939.164	914.977	840.288	828.124	861.445	802.524	563.137	621.652	800.964
A0A0H2ZTC3	784.74	742.23	3573.09	3678.54	312.91	193.2	469.927	413.821	494.48	368.225	404.577	433.467	701.836	591.228	632.068	433.785	286.319	320.042	763.485	3625.82	253.055	441.874	431.353	419.022	646.532	532.926	303.18
A0A0H2ZTC5	613.989	870.809	766.403	794.208	942.602	972.04	1003.31	934.04	937.069	916.239	984.119	858.873	596.548	592.577	620.323	599.989	561.565	695.06	742.399	780.306	957.321	968.677	926.654	921.496	594.563	610.156	628.312
A0A0H2ZTC6	556.916	552.692	943.241	1023.8	895.407	962.766	724.853	806.599	797.453	824.259	576.939	986.471	841.226	701.693	786.735	716.463	879.197	554.731	554.804	983.519	929.086	765.726	810.856	781.705	771.459	751.599	716.964
A0A0H2ZTC9	707.095	740.238	845.902	645.274	819.462	871.215	823.976	875.498	773.166	891.542	767.742	864.791	650.458	789.038	823.06	708.471	804.083	739.133	723.666	745.588	845.339	849.737	832.354	816.266	719.748	765.766	771.608
A0A0H2ZTD0	797.568	788.819	739.983	602.989	381.73	388.198	1220.54	1201.79	1194.89	1420.48	858.783	796.193	623.398	638.848	651.594	628.36	580.229	767.501	793.194	671.486	384.964	1211.16	1307.68	827.488	631.123	639.977	673.865
A0A0H2ZTD1	725.332	619.213	648.659	595.271	943.827	814.811	897.181	742.535	851.244	775.488	794.344	817.336	750.15	678.063	699.561	709.247	687.213	1358.24	672.272	621.965	879.319	819.858	813.366	805.84	714.107	704.404	1022.73
A0A0H2ZTD2	442.437	552.837	530.832	596.834	1362.06	1148.28	691.661	781.709	684.797	844.233	644.809	758.81	810.008	935.649	859.635	860.259	891.1	548.049	497.637	563.833	1255.17	736.685	764.515	701.809	872.828	859.947	719.575
A0A0H2ZTD3	762.969	545.853	656.366	592.358	666.848	636.147	540.128	637.108	614.268	603.93	663.507	669.419	1012.08	839.14	924.146	857.851	1030.31	1590.69	654.411	624.362	651.498	588.618	609.099	666.463	925.612	890.999	1310.5
A0A0H2ZTD6	945.642	846.445	743.167	702.303	956.562	938.873	882.55	861.598	895.163	927.512	893.511	899.433	612.298	632.881	585.093	635.886	559.061	758.915	896.044	722.735	947.717	872.074	911.337	896.472	622.59	610.489	658.988
A0A0H2ZTD7	891.326	736.4	715.146	671.901	863.791	721.945	876.468	742.789	921.368	790.841	837.736	776.585	647.388	686.463	645.87	745.468	642.662	1228.13	813.863	693.524	792.868	809.628	856.105	807.16	666.925	695.669	935.397
A0A0H2ZTD8	1201.52	1086.47	842.991	723.072	738.379	633.504	797.564	668.331	818.7	663.519	789.408	673.162	680.399	622.531	658.454	737.372	583.853	1311.86	1143.99	783.032	685.941	732.947	741.109	731.285	651.465	697.913	947.857
A0A0H2ZTD9	840.669	774.379	802.942	683.041	890.274	836.326	886.704	877.217	853.049	911.914	865.21	853.858	651.169	760.555	619.732	727.531	641.968	702.555	807.524	742.992	863.3	881.961	882.482	859.534	705.862	673.631	672.262
A0A0H2ZTE0	1179.22	783.08	1015.46	817.762	720.649	791.35	555.876	749.272	694.972	729.236	698.546	782.765	724.784	856.544	695.734	916.945	802.253	579.923	981.148	916.609	755.999	652.574	712.104	740.656	790.664	806.34	691.088
A0A0H2ZTE1	486.432	188.452	192.076	231.58	407.919	447.693	2248.43	2159.86	2355.72	3128.77	810.622	804.494	208.259	156.34	232.105	216.52	200.048	349.624	337.442	211.828	427.806	2204.14	2742.24	807.558	182.299	224.312	274.836
A0A0H2ZTE2	1912.5	1949.55	1719.47	1373.85	338.409	232.3	697.105	677.621	701.219	818.724	575.263	688.983	603.251	659.617	494.36	493.311	402.15	383.793	1931.03	1546.66	285.355	687.363	759.971	632.123	631.434	493.835	392.971
A0A0H2ZTE3	559.75	580.112	646.357	841.906	944.821	1039.32	604.634	799.39	826.024	877.166	794.256	1122.77	839.6	705.379	785.789	791.139	887.136	357.903	569.931	744.131	992.072	702.012	851.595	958.513	772.489	788.464	622.52
A0A0H2ZTE4	1000.99	794.872	415.241	668.202	801.034	625.489	670.332	726.569	698.187	525.226	1043.8	436.668	791.901	793.131	820.364	1113.05	662.62	1217.2	897.929	541.721	713.261	698.45	611.706	740.233	792.516	966.706	939.912
A0A0H2ZTE6	1076.97	725.939	629.739	763.904	904.974	797.776	796.402	579.135	905.917	549.414	785.208	658.446	717.362	594.696	634.687	894.91	600.816	1465.97	901.454	696.822	851.375	687.768	727.665	721.827	656.029	764.799	1033.39
A0A0H2ZTE8	1464.59	1335.82	837.732	680.875	841.61	852.173	720.082	684.904	735.253	637.954	681.182	630.15	644.449	863.355	617.272	907.858	625.209	446.349	1400.2	759.303	846.891	702.493	686.604	655.666	753.902	762.565	535.779
A0A0H2ZTE9	917.865	734.236	946.691	834.422	785.575	706.068	804.405	717.079	802.676	719.539	748.647	684.768	651.722	719.423	704.429	879.839	720.225	1038.1	826.051	890.556	745.821	760.742	761.108	716.707	685.572	792.134	879.161
A0A0H2ZTF0	812.158	738.604	870.795	720.114	837.926	873.738	836.851	777.133	780.248	880.754	757.324	832.04	684.786	703.196	772.53	670.569	701.261	954.002	775.381	795.455	855.832	806.992	830.501	794.682	693.991	721.55	827.631
A0A0H2ZTF2	787.991	730.682	689.428	670.126	823.148	795.733	814.029	835.445	896.415	890.703	832.042	924.701	735.088	815.117	695.053	827.318	713.623	579.515	759.336	679.777	809.44	824.737	893.559	878.372	775.102	761.185	646.569
A0A0H2ZTF3	1038.4	961.809	1146.2	1077.59	730.777	726.253	636.846	612.542	692.615	652.206	609.097	629.386	790.779	693.518	792.375	681.002	689.867	1087.42	1000.1	1111.89	728.515	624.694	672.41	619.242	742.149	736.688	888.644
A0A0H2ZTF4	346.403	662.731	534.282	730.318	466.671	775.76	387.677	856.342	400.508	625.911	510.527	870.89	1394.71	964.536	1344.63	858.571	1289.85	645.55	504.567	632.3	621.216	622.009	513.209	690.708	1179.62	1101.6	967.7
A0A0H2ZTF5	1775.07	2022.38	936.066	1602.48	394.707	293.316	538.812	505.373	920.434	602.581	847.807	585.65	639.488	501.366	576.541	580.944	534.903	561.347	1898.72	1269.27	344.012	522.093	761.507	716.728	570.427	578.742	548.125
A0A0H2ZTF6	692.417	973.002	443.555	669.231	703.542	953.498	594.613	836.495	669.752	604.491	783.671	824.215	1009.82	871.844	930.996	925.348	982.437	360.521	832.709	556.393	828.52	715.554	637.121	803.943	940.834	928.172	671.479
A0A0H2ZTF7	579.117	585.682	683.43	634.58	746.141	679.345	763.245	681.847	729.665	688.948	746.026	694.602	891.486	844.585	895.297	773.265	873.64	1439.91	582.4	659.005	712.743	722.546	709.307	720.314	868.036	834.281	1156.77
A0A0H2ZTF8	767.569	962.069	761.765	733.315	844.986	794.434	626.824	864.41	782.983	697.341	753.823	812.819	768.438	789.187	802.706	806.99	853.137	619.794	864.819	747.54	819.71	745.617	740.162	783.321	778.813	804.848	736.466
A0A0H2ZTG2	698.399	826.017	694.553	786.056	708.777	871.475	639.369	802.395	736.317	810.307	785.589	920.13	902.942	772.26	856.261	786.522	879.068	522.684	762.208	740.305	790.126	720.882	773.312	852.859	837.601	821.392	700.876
A0A0H2ZTG3	552.959	591.643	598.1	553.73	803.538	823.445	861.468	798.522	804.78	1015.33	814.063	911.282	798.754	791.704	876.291	763.232	803.909	847.943	572.301	575.915	813.492	829.995	910.057	862.673	795.229	819.762	825.926
A0A0H2ZTG7	787.877	889.955	736.857	869.396	751.056	890.003	702.16	791.424	760.907	676.877	822.559	747.911	790.033	805.877	810.922	788.54	795.08	617.8	838.916	803.126	820.53	746.792	718.892	785.235	797.955	799.731	706.44
A0A0H2ZTG8	549.216	1041.83	701.758	843.373	407.74	469.245	533.414	493.81	359.637	532.693	401.314	608.828	1346.18	1071.05	1310.76	996.212	1189.17	832.212	795.524	772.565	438.492	513.612	446.165	505.071	1208.61	1153.49	1010.69
A0A0H2ZTH0	801.293	709.976	715.708	726.78	672.916	808.86	699.729	813.966	766.028	786.811	798.94	839.225	860.324	733.863	830.801	787.608	797.438	878.738	755.635	721.244	740.888	756.848	776.42	819.083	797.093	809.204	838.088
A0A0H2ZTH1	665.474	534.539	706.866	599.141	740.188	672.196	867.012	721.279	809.735	763.941	827.52	746.572	778.677	740.029	821.162	854.535	744.286	1389.44	600.006	653.004	706.192	794.145	786.838	787.046	759.353	837.848	1066.86
A0A0H2ZTH2	1084.72	943.694	959.61	798.925	703.038	722.108	643.501	764.345	747.97	816.669	756.348	869.307	717.143	766.39	723.762	752.057	735.362	674.861	1014.21	879.267	712.573	703.923	782.319	812.828	741.767	737.91	705.112
A0A0H2ZTH3	587.485	655.07	659.432	477.664	884.902	946.28	876.343	793.87	884.252	762.111	832.515	756.05	717.038	741.35	760.643	781.985	754.21	1165.98	621.278	568.548	915.591	835.106	823.182	794.282	729.194	771.314	960.095
A0A0H2ZTH7	764.958	948.947	612.26	611.183	719.662	746.787	784.477	906.459	897.095	1007.72	837.278	967.141	800.831	750.168	765.935	642.922	755.509	602.611	856.952	611.721	733.225	845.468	952.407	902.21	775.5	704.428	679.06
A0A0H2ZTH9	856.657	991.351	888.285	1022.53	625.647	678.256	595.237	690.781	574.343	498.162	626.302	556.135	888.984	854.45	843.476	1066.64	1059.45	571.485	924.004	955.406	651.951	643.009	536.253	591.218	871.717	955.057	815.47
A0A0H2ZTI0	250.165	766.091	848.373	1604.79	326.571	629.808	328.814	652.625	375.077	983.7	322.982	1243.59	1468.42	689.094	886.097	379.657	1848.6	327.437	508.128	1226.58	478.189	490.719	679.388	783.284	1078.76	632.877	1088.02
A0A0H2ZTI1	606.527	803.189	661.006	617.409	720.388	870.413	762.401	831.982	743.911	670.197	1024.23	750.139	740.804	770.636	800.91	932.63	825.623	774.095	704.858	639.208	795.401	797.192	707.054	887.186	755.72	866.77	799.859
A0A0H2ZTI3	494.378	803.475	457.742	941.912	658.316	1185.23	566.7	1073.76	666.896	777.13	732.644	639.922	1114.06	707.685	992.089	754.865	1073.17	267.613	648.926	699.827	921.774	820.23	722.013	686.283	910.875	873.477	670.391
A0A0H2ZTI4	661.171	598.982	719.558	621.158	886.54	830.272	794.832	726.292	765.475	758.504	731.166	729.864	770.013	805.986	808.17	810.624	832.288	1158.6	630.076	670.358	858.406	760.562	761.989	730.515	788	809.397	995.442
A0A0H2ZTI5	750.942	833.355	859.316	841.171	705.605	677.763	939.699	913.529	955.408	848.141	682.611	667.406	718.09	742.424	682.588	834.008	752.523	720.694	792.149	850.243	691.684	926.614	901.774	675.008	730.257	758.298	736.608
A0A0H2ZTI6	568.38	525.655	735.476	616.671	695.779	669.466	952.102	642.042	778.076	881.54	821.829	737.369	753.58	816.375	902.787	726.474	753.282	1444.21	547.018	676.073	682.623	797.072	829.808	779.599	784.978	814.631	1098.75
A0A0H2ZTI7	831.258	837.511	829.982	696.499	833.665	916.588	833.461	886.259	875.487	1176.1	822.94	1094.28	632.265	442.794	708.49	499.354	679.116	777.161	834.385	763.24	875.126	859.86	1025.79	958.61	537.53	603.922	728.138
A0A0H2ZTI8	755.821	817.558	653.933	804.475	552.586	714.17	444.481	718.774	540.367	767.628	667.326	959.167	881.25	849.122	1190.77	733.993	1153.65	715.68	786.69	729.204	633.378	581.627	653.998	813.246	865.186	962.382	934.666
A0A0H2ZTJ0	1204.05	784.004	575.704	624.746	864.668	935.425	884.106	854.933	746.634	932.162	788.182	855.387	644.167	572.576	703.23	584.758	658.655	1083.16	994.029	600.225	900.046	869.52	839.398	821.785	608.371	643.994	870.91
A0A0H2ZTJ1	615.139	928.371	555.906	833.688	656.264	763.12	563.496	760.427	730.487	616.428	729.147	733.724	979.777	982.249	921.604	987.462	1063.44	346.539	771.755	694.797	709.692	661.961	673.458	731.435	981.013	954.533	704.991
A0A0H2ZTJ2	755.587	828.401	614.767	712.235	1048.4	864.367	1051.89	857.224	933.739	979.429	985.208	923.494	543.621	599.769	562.271	537.88	545.327	943.654	791.994	663.501	956.385	954.556	956.584	954.351	571.695	550.076	744.49
A0A0H2ZTJ3	511.863	412.016	575.48	537.689	676.58	657.537	725.043	679.957	653.5	737.854	673.913	664.308	833.145	1008.18	959.881	1000.6	1221.14	1192.67	461.939	556.584	667.059	702.5	695.677	669.111	920.663	980.241	1206.9
A0A0H2ZTJ4	1478.58	1207.62	1595.68	1177.79	563.701	676.331	604.886	661.136	533.139	838.9	505.997	674.421	722.353	732.702	703.091	562.674	608.994	670.03	1343.1	1386.74	620.016	633.011	686.019	590.209	727.528	632.882	639.512
A0A0H2ZTJ5	649.959	869.414	753.276	850.732	1061.4	1163.56	803.646	831.326	791.338	841.614	824.119	894.117	677.575	702.529	714.873	551.536	726.291	524.306	759.687	802.004	1112.48	817.486	816.476	859.118	690.052	633.204	625.299
A0A0H2ZTJ7	948.246	686.712	596.291	570.866	530.095	478.726	507.017	636.917	756.956	489.086	1086.3	600.052	873.72	749.885	751.604	856.017	803.479	1909.53	817.479	583.578	504.41	571.967	623.021	843.174	811.802	803.811	1356.5
A0A0H2ZTJ8	467.862	866.517	315.056	731.475	555.366	701.277	370.86	689.951	538.859	419.122	638.262	586.851	1306.24	988.085	1085.55	1407.37	1357.19	363.276	667.19	523.266	628.321	530.406	478.99	612.556	1147.16	1246.46	860.233
A0A0H2ZTJ9	548.215	610.746	2541.98	2957.18	365.256	474.688	1134.62	928.367	1026.56	727.686	377.708	334.711	669.472	457.998	597.194	478.568	247.6	281.679	579.481	2749.58	419.972	1031.49	877.123	356.21	563.735	537.881	264.64
A0A0H2ZTK0	602.508	754.037	565.999	503.528	881.214	1051.96	692.872	930.491	949.807	1048.35	701.264	1037.46	917.838	899.644	711.325	586.379	871.217	372.4	678.273	534.764	966.586	811.681	999.081	869.364	908.741	648.852	621.808
A0A0H2ZTK2	641.263	674.194	643.676	831.007	803.59	806.374	818.322	804.003	822.352	784.419	763.385	773.807	810.317	856.107	829.664	806.294	806.649	712.809	657.729	737.342	804.982	811.162	803.386	768.596	833.212	817.979	759.729
A0A0H2ZTK5	459.144	514.737	598.25	719.317	760.754	825.481	640.593	804.717	776.184	838.859	752.327	876.992	946.777	931.281	907.535	907.576	987.977	571.672	486.94	658.784	793.117	722.655	807.522	814.659	939.029	907.556	779.824
A0A0H2ZTK9	1733.34	2508.85	1675.49	1280.67	788.114	773.494	509.472	375.784	494.601	441.082	436.245	375.562	621.714	558.156	629.556	516.076	527.956	475.279	2121.1	1478.08	780.804	442.628	467.841	405.904	589.935	572.816	501.618
A0A0H2ZTL0	660.48	929.55	766.993	1003.87	644.643	847.452	669.767	761.755	744.477	697.007	808.873	856.418	856.645	800.734	917.663	742.303	846.023	463.129	795.015	885.434	746.048	715.761	720.742	832.645	828.69	829.983	654.576
A0A0H2ZTL1	421.264	566.72	611.541	629.754	793.318	845.411	857.051	864.951	828.755	979.287	874.243	980.259	827.751	896.197	839.505	753.466	824.484	565.447	493.992	620.648	819.365	861.001	904.021	927.251	861.974	796.486	694.966
A0A0H2ZTL3	599.006	756.429	663.238	698.221	784.054	829.896	793.751	698.868	681.757	667.837	710.073	704.157	904.697	848.769	892.463	824.808	887.663	999.4	677.718	680.73	806.975	746.309	674.797	707.115	876.733	858.635	943.531
A0A0H2ZTL4	488.87	431.967	433.465	544.211	818.831	659.164	756.309	617.156	726.166	632.129	739.064	715.169	1002.38	816.735	944.416	842.718	915.678	1717.69	460.418	488.838	738.998	686.732	679.147	727.117	909.557	893.567	1316.68
A0A0H2ZTL6	396.107	300.274	1985.84	2071.68	423.751	426.093	1361.9	824.848	867.097	814.554	408.089	432.94	725.375	533.459	696.115	880.623	488.017	763.054	348.19	2028.76	424.922	1093.37	840.826	420.514	629.417	788.369	625.535
A0A0H2ZTL7	547.796	887.486	712.986	747.115	675.099	860.187	690.557	928.025	725.673	690.591	706.989	787.308	985.323	690.19	945.296	812.006	895.078	697.495	717.641	730.051	767.643	809.291	708.132	747.148	837.757	878.651	796.287
A0A0H2ZTL8	904.836	724.514	744.699	729.299	1172	947.346	643.266	579.105	651.026	722.331	560.179	576.525	799.399	796.65	754.275	743.566	814.78	1250.67	814.675	736.999	1059.67	611.186	686.678	568.352	798.025	748.921	1032.72
A0A0H2ZTL9	1009.05	1117.64	901.684	838.829	567.526	640.596	815.442	940.516	913.512	1033.63	840.582	1007.57	770.714	545.005	715.851	533.26	533.904	627.795	1063.35	870.257	604.061	877.979	973.572	924.078	657.86	624.556	580.849
A0A0H2ZTM0	644.001	752.504	843.421	681.587	825.501	838.993	787.567	932.867	788.508	1028.57	605.005	700.32	777.71	827.903	946.647	844.441	792.733	473.248	698.252	762.504	832.247	860.217	908.537	652.663	802.807	895.544	632.991
A0A0H2ZTM1	748.802	785.249	739.946	788.424	1102.82	801.406	827.861	806.875	783.154	879.219	764.905	803.875	661.807	820.103	681.001	780.193	724.517	620.871	767.026	764.185	952.113	817.368	831.186	784.39	740.955	730.597	672.694
A0A0H2ZTM2	701.431	767.592	433.434	961.834	388.942	481.16	279.601	536.851	354.612	329.758	524.592	402.454	1374.97	1136.95	1174.2	1514.33	1438.69	507.259	734.512	697.634	435.051	408.226	342.185	463.523	1255.96	1344.26	972.972
A0A0H2ZTM3	721.051	674.778	843.356	669.619	864.534	822.157	761.256	676.685	697.039	771.782	699.27	782.215	788.447	730.366	863.538	848.137	772.018	1073.29	697.915	756.487	843.345	718.97	734.41	740.742	759.407	855.837	922.653
A0A0H2ZTM6	523.444	459.19	552.397	365.43	1185.61	899.98	926.675	838.427	841.636	928.945	844.123	833.588	675.821	965.348	726.697	818.027	691.035	912.504	491.317	458.913	1042.79	882.551	885.291	838.855	820.585	772.362	801.769
A0A0H2ZTM7	598.447	588.57	665.283	578.606	883.332	872.149	877.856	879.575	839.472	1002.46	857.282	948.313	703.624	900.938	759.923	734.318	770.063	588.039	593.509	621.945	877.741	878.715	920.964	902.797	802.281	747.12	679.051
A0A0H2ZTM8	707.651	759.839	825.205	776.856	794.882	785.172	747.65	734.228	715.319	673.463	768.437	705.92	801.789	860.921	821.676	766.351	797.934	986.092	733.745	801.031	790.027	740.939	694.391	737.179	831.355	794.014	892.013
A0A0H2ZTM9	571.291	682.643	634.341	754.629	880.274	961.351	703.432	863.29	752.748	806.092	755.624	934.217	839.318	830.754	839.74	811.578	920.477	429.049	626.967	694.485	920.812	783.361	779.42	844.921	835.036	825.659	674.763
A0A0H2ZTN1	505.7	465.398	596.06	610.498	444.936	475.361	875.323	652.555	872.981	773.528	800.51	725.169	935.082	1156.8	965.412	950.458	859.033	1065.25	485.549	603.279	460.148	763.939	823.255	762.84	1045.94	957.935	962.142
A0A0H2ZTN2	639.331	356.649	785.365	332.324	696.358	648.574	894.55	459.039	744.965	625.75	769.623	729.721	813.847	510.165	904.534	788.561	731.613	2589.18	497.99	558.845	672.466	676.795	685.358	749.672	662.006	846.548	1660.4
A0A0H2ZTN3	558.491	752.907	657.49	882.86	819.276	831.121	743.369	756.635	725.434	704.124	714.683	691.634	855.64	831.868	913.482	760.813	917.301	854.002	655.699	770.175	825.198	750.002	714.779	703.159	843.754	837.147	885.652
A0A0H2ZTN4	726.435	674.843	900.396	677.699	862.498	869.64	885.699	725.13	775.653	780.313	786.209	703.284	537.719	922.681	697.525	923.629	872.189	708.767	700.639	789.047	866.069	805.414	777.983	744.746	730.2	810.577	790.478
A0A0H2ZTN5	678.765	758.581	787.504	748.962	802.828	813.281	820.068	845.303	831.258	850.146	830.47	820.647	712.308	710.864	763.06	764.9	758.92	799.722	718.673	768.233	808.054	832.686	840.702	825.558	711.586	763.98	779.321
A0A0H2ZTN6	1575.12	1290.47	1855.99	1407.43	594.528	523.114	758.85	741.653	695.514	789.117	572.224	646.554	461.406	502.232	490.65	530.161	453.788	830.608	1432.79	1631.71	558.821	750.251	742.316	609.389	481.819	510.405	642.198
A0A0H2ZTN7	689.896	685.282	762.616	752.101	941.766	927.419	692.166	618.438	684.526	661.778	647.1	627.874	826.484	912.322	861.706	750.329	868.385	1100.56	687.589	757.358	934.593	655.302	673.152	637.487	869.403	806.017	984.475
A0A0H2ZTN8	1282.11	1414.98	1424.48	1007.38	958.265	756.293	779.96	701.488	741.527	650.297	618.29	590.688	483.405	534.983	514.426	563.722	525.815	1022.63	1348.55	1215.93	857.279	740.724	695.912	604.489	509.194	539.074	774.222
A0A0H2ZTP0	1151.67	1309.55	593.689	649.046	1202.28	1032.97	814.956	889.775	937.017	658.28	885.834	948.621	537.449	472.709	483.983	539.798	498.145	791.094	1230.61	621.367	1117.63	852.365	797.649	917.227	505.079	511.891	644.619
A0A0H2ZTP1	545.258	731.289	633.926	581.034	853.855	864.033	832.033	852.314	861.902	875.34	794.129	761.999	768.668	904.256	794.892	755.91	838.52	748.579	638.274	607.48	858.944	842.173	868.621	778.064	836.462	775.401	793.549
A0A0H2ZTP2	713.97	753.797	893.003	671.153	735.178	763.997	668.298	724.979	749.873	784.918	722.767	800.446	845.089	867.966	785.717	842.628	860.113	820.01	733.884	782.078	749.588	696.639	767.395	761.607	856.527	814.172	840.062
A0A0H2ZTP3	573.879	706.426	736.835	888.138	876.874	1009.63	966.464	1068.57	1100.88	1039.89	792.912	1088.85	649.14	507.005	578.456	471.293	728.317	538.721	640.152	812.486	943.252	1017.52	1070.39	940.879	578.073	524.874	633.519
A0A0H2ZTP4	911.047	824.899	589.806	760.403	985.131	886.1	659.404	744.428	702.625	660.27	772.247	836.706	921.374	613.416	757.211	554.198	671.096	1314.09	867.973	675.105	935.616	701.916	681.448	804.477	767.395	655.704	992.593
A0A0H2ZTP5	300.912	779.186	1071.67	1271.49	757.225	874.804	844.951	643.931	1150.54	861.276	1014.43	1118.76	619.319	709.671	575.211	525.546	649.354	428.715	540.049	1171.58	816.014	744.441	1005.91	1066.59	664.495	550.379	539.034
A0A0H2ZTQ0	498.527	568.665	633.941	640.374	1441.52	1242.69	743.213	801.733	665.044	779.203	614.285	725.342	762.396	860.018	806.223	798.482	819.276	650.717	533.596	637.158	1342.1	772.473	722.124	669.813	811.207	802.352	734.997
A0A0H2ZTQ2	1278.55	1533.17	1246.45	986.982	812.503	853.983	715.06	536.42	648.295	532.104	656.065	502.47	640.703	678.135	650.356	716.052	584.86	807.346	1405.86	1116.72	833.243	625.74	590.199	579.267	659.419	683.204	696.103
A0A0H2ZTQ3	870.342	862.042	881.099	801.52	832.904	758.237	811.06	795.197	826.895	856.21	848.51	810.676	671.254	757.671	653.154	748.472	660.31	721.703	866.192	841.31	795.571	803.129	841.553	829.593	714.463	700.813	691.007
A0A0H2ZTQ5	784.591	845.503	799.802	1138.41	636.526	590.99	651.939	557.973	911.774	526.856	682.253	595.541	851.149	704.994	847.83	1042.77	802.332	946.213	815.047	969.104	613.758	604.956	719.315	638.897	778.071	945.299	874.272
A0A0H2ZTQ7	1202.99	1294.66	1138.58	1224.02	747.324	902.543	595.207	636.079	604.219	663.952	620.044	591.778	727.684	593.019	747.964	551.132	759.96	778.922	1248.83	1181.3	824.934	615.643	634.085	605.911	660.351	649.548	769.441
A0A0H2ZTQ8	920.853	891.834	1070.81	892.684	939.489	888.289	785.46	797.874	756.792	832.331	806.803	778.006	561.428	622.79	607.299	698.272	679.141	766.471	906.344	981.748	913.889	791.667	794.561	792.405	592.109	652.785	722.806
A0A0H2ZTQ9	628.438	640.739	576.683	575.725	750.949	712.051	872.451	718.264	758.564	731.14	792.869	710.914	845.024	727.263	874.752	779.271	815.4	1463.35	634.588	576.204	731.5	795.357	744.852	751.892	786.143	827.012	1139.38
A0A0H2ZTR0	1061.63	1151.2	1574.17	1814.78	508.691	456.145	665.454	517.924	576.946	530.483	512.518	478.853	789.616	786.869	801.994	701.971	728.963	642.617	1106.41	1694.47	482.418	591.689	553.715	495.686	788.243	751.982	685.79
A0A0H2ZTR1	1113.26	683.355	864.61	750.12	831.224	826.054	676.531	682.611	653.853	673.091	627.585	714.803	707.927	874.17	800.86	815.337	806.012	1001.22	898.307	807.365	828.639	679.571	663.472	671.194	791.048	808.098	903.614
A0A0H2ZTR2	545.481	877.973	555.78	795.739	800.565	806.469	1090.37	974.736	1071.49	894.687	1069.17	869.283	588.992	718.217	622.514	687.594	605.584	539.91	711.727	675.76	803.517	1032.55	983.088	969.229	653.604	655.054	572.747
A0A0H2ZTR4	1260.01	900.975	1095.76	952.687	331.501	899.13	912.463	717.319	639.847	1156.41	685.48	1069.73	832.507	564.181	789.361	599.71	605.937	398.999	1080.49	1024.23	615.315	814.891	898.127	877.606	698.344	694.535	502.468
A0A0H2ZTR6	799.661	572.278	692.989	710.689	806.112	826.906	761.371	732.926	959.494	722.078	918.645	797.073	722.479	794.432	663.425	879.697	652.868	978.626	685.97	701.839	816.509	747.149	840.786	857.859	758.455	771.561	815.747
A0A0H2ZTR7	937.698	759.275	650.59	481.294	349.804	666.849	978.948	1264.71	1378.22	890.269	1368.03	1444.07	583.234	638.233	538.094	682.695	207.073	365.078	848.487	565.942	508.327	1121.83	1134.24	1406.05	610.733	610.394	286.076
A0A0H2ZTR8	1390.06	1038.28	871.952	871.373	1060.38	815.813	816.214	796.88	732.818	848.478	648.394	725.242	514.591	642.023	600.3	639.428	586.158	815.926	1214.17	871.663	938.095	806.547	790.648	686.818	578.307	619.864	701.042
A0A0H2ZTR9	1209.23	823.019	807.272	734.435	769.88	708.813	957.406	723.79	925.719	797.658	883.742	766.198	538.224	651.002	558.523	814.77	495.211	1069.66	1016.13	770.853	739.346	840.598	861.689	824.97	594.613	686.647	782.436
A0A0H2ZTS3	446.506	574.161	719.47	570.781	920.427	913.833	751.292	765.616	815.151	887.46	762.226	807.483	842.444	944.085	778.796	730.849	874.868	868.273	510.333	645.126	917.13	758.454	851.305	784.855	893.264	754.823	871.571
A0A0H2ZTS4	616.097	691.105	809.598	728.382	833.091	722.326	848.484	767.004	845.978	838.026	815.196	799.485	732.592	853.684	724.973	818.988	760.517	823.856	653.601	768.99	777.709	807.744	842.002	807.34	793.138	771.98	792.187
A0A0H2ZTS7	455.82	807.156	734.966	898.712	634.006	919.554	477.78	633.896	456.138	646.223	448.346	627.427	1061.56	929.449	1171.4	924.862	1364.49	592.763	631.488	816.839	776.78	555.838	551.181	537.886	995.502	1048.13	978.626
A0A0H2ZTS8	523.215	708.004	608.447	860.603	586.071	722.361	479.821	853.287	617.99	595.114	706.603	693.051	1078.87	905.584	1140.62	1148.96	1044.55	402.762	615.609	734.525	654.216	666.554	606.552	699.827	992.225	1144.79	723.654
A0A0H2ZTT8	1048.55	912.802	954.825	877.822	799.124	815.659	820.838	783.698	836.122	839.369	806.933	820.759	609.156	616.47	614.471	636.869	628.544	886.579	980.675	916.324	807.392	802.268	837.746	813.846	612.813	625.67	757.562
A0A0H2ZTT9	2505.91	2236	1080.21	817.139	550.221	582.635	448.018	659.51	629.094	445.383	1108.08	521.502	348.72	637.913	293.44	987.625	370.372	204.477	2370.96	948.674	566.428	553.764	537.239	814.793	493.316	640.533	287.424
A0A0H2ZTU1	488.438	814.889	845.196	695.573	830.395	974.028	964.43	1325.97	1052.83	1381.36	1067.95	1392.11	582.663	315.75	571.223	343.889	589.125	228.718	651.664	770.385	902.211	1145.2	1217.1	1230.03	449.207	457.556	408.921
A0A0H2ZTU3	782.133	709.894	944.474	674.623	830.023	594.475	628.345	660.911	658.777	502.536	736.204	643.823	869.179	902.329	690.4	1253.25	855.764	873.926	746.014	809.548	712.249	644.628	580.656	690.014	885.754	971.823	864.845
A0A0H2ZTU5	427.986	340.988	476.378	456.991	726.672	899.505	1176.08	1203.96	1189.58	1293.68	766.058	1269.66	831.179	516.358	833.46	458.035	522.224	877.426	384.487	466.684	813.089	1190.02	1241.63	1017.86	673.768	645.748	699.825
A0A0H2ZTU6	648.588	681.225	677.702	453.592	697.87	473.411	792.445	942.137	928.491	1007.47	699.345	763.079	857.257	690.577	819.079	790.991	817.992	1290.6	664.907	565.647	585.641	867.291	967.98	731.212	773.917	805.035	1054.29
A0A0H2ZTU7	709.167	560.38	645.848	619.056	784.09	759.033	765.328	674.997	786.062	745.962	768.226	785.958	886.53	880.937	771.54	907.023	814.627	1044.24	634.774	632.452	771.562	720.162	766.012	777.092	883.734	839.282	929.433
A0A0H2ZTU9	1368.56	1217.6	1565.47	863.403	730.401	1118.61	926.627	691.835	677.602	901.526	767.732	774.805	372.474	608.174	531.796	485.079	435.885	633.637	1293.08	1214.44	924.505	809.231	789.564	771.269	490.324	508.438	534.761
A0A0H2ZTV0	642.703	631.986	865.534	752.906	737.8	717.841	829.602	712.161	849.31	835.86	787.275	785.391	740.969	774.574	750.466	759.622	788.18	1101.9	637.345	809.22	727.821	770.882	842.585	786.333	757.771	755.044	945.04
A0A0H2ZTV1	771.588	1061.37	743.451	801.073	991.545	1271.29	414.3	394.137	366.861	351.418	456.491	358.638	1114.54	1026.34	1054.23	1167.48	1010.24	427.572	916.478	772.262	1131.42	404.219	359.14	407.565	1070.44	1110.86	718.909
A0A0H2ZTV2	804.349	1045.23	844.593	841.322	1019.68	1017.92	908.015	878.67	834.796	838.348	941.931	808.049	590.718	532.585	591.756	583.085	542.015	712.89	924.791	842.957	1018.8	893.342	836.572	874.99	561.651	587.42	627.452
A0A0H2ZTV4	1048.11	1268.42	1039.47	965.56	636.122	923.406	194.73	446.955	255.773	383.737	235.863	341	1254.65	978.689	1082.63	780.725	1215.11	925.919	1158.27	1002.52	779.764	320.843	319.755	288.431	1116.67	931.68	1070.52
A0A0H2ZTV5	532.091	694.134	515.786	737.706	725.178	943.96	682.845	939.658	719.418	864.396	810.354	902.159	948.343	862.603	958.366	771.216	931.978	375.805	613.112	626.746	834.569	811.252	791.907	856.256	905.473	864.791	653.892
A0A0H2ZTV6	969.629	794.53	816.851	825.351	732.414	813.404	760.373	736.312	782.83	889.811	651.579	863.021	748.917	645.866	734.803	714.236	841.063	865.343	882.079	821.101	772.909	748.342	836.321	757.3	697.391	724.52	853.203
A0A0H2ZTV7	252.108	686.433	1179.72	682.27	469.756	1026.81	478.065	846.783	340.587	1022.95	424.801	975.946	1004.43	730.018	1331.89	512.557	1379.8	749.02	469.271	930.997	748.281	662.424	681.766	700.374	867.222	922.226	1064.41
A0A0H2ZTV8	681.622	774.392	837.966	794.846	565.545	690.4	817.374	806.211	917.484	876.223	905.586	831.989	754.072	765.754	806.985	747.95	683.101	813.559	728.007	816.406	627.972	811.792	896.854	868.787	759.913	777.467	748.33
A0A0H2ZTV9	1391.83	1500.28	1164.93	986.462	710.639	689.821	829.811	751.572	731.882	794.699	650.644	712.647	592.279	563.347	592.923	544.635	583.889	725.122	1446.05	1075.7	700.23	790.692	763.291	681.645	577.813	568.779	654.506
A0A0H2ZTW0	1852.46	992.363	1158.81	1218.34	422.693	539.475	848.392	915.658	889.023	1075.04	775.421	855.165	397.353	455.404	479.869	526.755	494.593	715.334	1422.41	1188.57	481.084	882.025	982.033	815.293	426.378	503.312	604.963
A0A0H2ZTW1	620.045	906.257	662.99	900.389	714.921	857.992	541.81	758.687	609.276	650.012	728.125	836.152	884.328	925.898	972.186	743.048	1111.6	488.048	763.151	781.689	786.456	650.248	629.644	782.139	905.113	857.617	799.822
A0A0H2ZTW2	733.61	943.125	733.587	827.646	488.786	608.623	633.665	786.913	620.084	453.37	668.587	562.632	1025.77	1002.47	1010.43	1238.21	971.594	401.276	838.367	780.617	548.705	710.289	536.727	615.61	1014.12	1124.32	686.435
A0A0H2ZTW4	593.794	634.054	729.499	726.984	840.385	837.237	742.811	796.71	735.514	822.808	744.106	793.137	839.393	858.668	838.948	754.132	868.79	845.169	613.924	728.242	838.811	769.76	779.161	768.621	849.031	796.54	856.98
A0A0H2ZTW6	1106.64	1124.17	875.197	728.517	907.911	604.466	820.795	651.249	890.718	497.308	906.357	704.171	93.4767	1046.59	473.81	1047.59	1033.38	494.942	1115.41	801.857	756.188	736.022	694.013	805.264	570.031	760.701	764.161
A0A0H2ZTW9	638.277	828.181	584.339	869.501	671.483	856.451	471.947	722.641	473.363	622.84	589.8	750.673	1139.51	1002.77	1087.16	885.068	1147.65	444.673	733.229	726.92	763.967	597.294	548.101	670.237	1071.14	986.114	796.161
A0A0H2ZTX0	373.54	952.354	739.256	759.187	1062.3	969.313	860.623	879.477	860.872	967.514	818.694	898.681	747.426	805.93	732.112	477.786	755.565	533.237	662.947	749.222	1015.8	870.05	914.193	858.687	776.678	604.949	644.401
A0A0H2ZTX2	926.118	853.317	999.268	665.08	826.251	778.095	757.561	732.138	815.3	683.216	700.627	669.369	628.776	859.737	698.33	815.553	746.44	979.874	889.717	832.174	802.173	744.849	749.258	684.998	744.257	756.941	863.157
A0A0H2ZTX3	464.721	353.899	388.627	406.482	818.63	672.422	1016.74	719.117	1059.88	719.395	945.551	714.489	735.664	763.023	765.355	830.365	685.842	1821.54	409.31	397.554	745.526	867.928	889.637	830.02	749.343	797.86	1253.69
A0A0H2ZTX4	351.832	324.142	674.934	938.036	380.185	389.571	323.959	315.666	385.188	353.229	375.134	345.388	1386.24	1216.03	1518.59	1171.76	1312.49	1635.59	337.987	806.485	384.878	319.813	369.209	360.261	1301.13	1345.18	1474.04
A0A0H2ZTX5	738.049	621.509	818.133	798.152	868.909	701.345	875.711	717.875	871.772	753.707	830.347	781.495	689.9	626.021	664.696	721.405	673.43	1385.96	679.779	808.143	785.127	796.793	812.739	805.921	657.96	693.05	1029.7
A0A0H2ZTX6	1199.87	917.613	797.295	623.776	824.669	477.964	823.23	811.783	894.335	755.733	833.42	744.22	612.414	740.652	633.813	732.417	505.161	1286.84	1058.74	710.535	651.317	817.506	825.034	788.82	676.533	683.115	896.001
A0A0H2ZTX7	831.941	714.005	697.843	669.296	884.685	888.381	881.669	794.817	889.449	873.836	884.801	824.632	691.966	709.442	654.364	708.338	606.159	950.334	772.973	683.57	886.533	838.243	881.642	854.716	700.704	681.351	778.247
A0A0H2ZTY0	571.813	645.385	587.895	696.431	1228.14	1255.88	150.075	268.642	225.603	258.273	215.405	249.247	1347.15	1233.31	1171.83	1108.77	1308.63	1061.12	608.599	642.163	1242.01	209.359	241.938	232.326	1290.23	1140.3	1184.88
A0A0H2ZTY1	620.046	1062.68	710.64	910.397	458.194	522.292	1225.99	1449.61	1083.99	1290.44	1223.7	1354.98	480.625	381.987	450.195	312.324	708.261	175.287	841.364	810.519	490.243	1337.8	1187.22	1289.34	431.306	381.26	441.774
A0A0H2ZTY2	908.47	1026.77	636.956	567.476	691.498	1489.03	169.183	391.902	151.851	272.044	200.42	297.673	1392.23	1047.48	1224.55	1064.67	1434.13	733.139	967.62	602.216	1090.26	280.542	211.947	249.047	1219.85	1144.61	1083.63
A0A0H2ZTY3	589.28	715.513	686.905	746.02	985.123	914.254	875.751	839.221	848.415	940.555	837.937	905.776	733.675	701.54	687.177	597.358	728.699	831.331	652.396	716.462	949.689	857.486	894.485	871.856	717.607	642.268	780.015
A0A0H2ZTY4	735.197	922.761	567.591	722.144	776.919	963.202	527.111	955.396	636.469	797.709	803.117	874.471	967.116	814.657	926.643	725.064	913.12	356.861	828.979	644.867	870.06	741.254	717.089	838.794	890.887	825.853	634.99
A0A0H2ZTY5	1911.62	1672.16	1003.54	875.228	547.497	550.106	840.769	808.872	730.591	859.167	662.373	729.86	546.354	607.918	535.412	494.805	521.852	693.678	1791.89	939.385	548.802	824.82	794.879	696.116	577.136	515.109	607.765
A0A0H2ZTY8	1241.75	968.718	1077.93	1036.65	698.297	729.931	620.061	683.43	667.784	746.416	681.861	726.702	701.386	583.009	704.61	843.476	739.329	784.778	1105.24	1057.29	714.114	651.746	707.1	704.281	642.198	774.043	762.053
A0A0H2ZTY9	1015.03	982.325	835.991	948.29	657.966	692.065	626.792	844.666	731.033	718.687	816.89	792.848	772.81	727.129	757.172	758.865	788.77	645.163	998.68	892.141	675.015	735.729	724.86	804.869	749.969	758.018	716.966
A0A0H2ZTZ0	680.579	722.785	815.589	668.477	770.224	592.628	864.187	655.803	832.375	581.078	759.601	632.782	340.488	1374.88	801.531	1219.65	1132.34	289.518	701.682	742.033	681.426	759.995	706.727	696.192	857.682	1010.59	710.931
A0A0H2ZTZ1	696.441	632.407	905.825	907.381	364.88	565.315	874.712	1192.55	968.533	716.867	838.851	954.465	1036.14	743.338	765.244	564.42	527.934	888.537	664.424	906.603	465.097	1033.63	842.7	896.658	889.737	664.832	708.235
A0A0H2ZTZ3	611.505	628.721	625.263	558.413	835.256	698.574	816.219	691.653	816.397	702.997	821.012	735.474	824.885	735.012	806.31	892.997	770.156	1364.97	620.113	591.838	766.915	753.936	759.697	778.243	779.949	849.654	1067.56
A0A0H2ZTZ4	807.034	453.642	580.452	437.3	576.546	461.987	1120.93	660.824	984.884	534.055	929.654	536.045	813.476	753.557	685.839	942.708	496.293	2145.99	630.338	508.876	519.266	890.878	759.47	732.849	783.516	814.274	1321.14
A0A0H2ZTZ5	919.597	826.089	928.479	673.697	1100.36	1069.76	843.128	705.643	661.298	881.636	590.847	658.26	719.623	612.735	743.047	590.401	633.453	1191.44	872.843	801.088	1085.06	774.385	771.467	624.554	666.179	666.724	912.445
A0A0H2ZTZ6	835.541	856.787	987.728	955.116	706.147	853.018	857.439	767.05	766.351	777.747	614.774	877.018	827.789	701.615	758.288	816.259	724.324	494.396	846.164	971.422	779.582	812.245	772.049	745.896	764.702	787.273	609.36
A0A0H2ZTZ9	583.715	744.445	534.979	854.143	732.161	724.595	639.979	731.785	639.936	690.186	776.585	813.405	890.182	877.586	946.921	717.731	1078.64	910.001	664.08	694.561	728.378	685.882	665.061	794.995	883.884	832.326	994.322
A0A0H2ZU00	702.737	1012.1	526.649	931.127	501.473	751.481	410.653	806.392	522.392	588.599	613.791	796.05	1542.26	791.792	916.595	883.219	1011.88	479.542	857.416	728.888	626.477	608.523	555.496	704.92	1167.03	899.907	745.709
A0A0H2ZU03	588.739	731.334	568.088	952.248	705.447	835.919	478.831	686.378	577.369	613.583	648.462	780.07	1067.42	844.174	1018.04	841.956	1143.56	735.613	660.037	760.168	770.683	582.604	595.476	714.266	955.795	929.999	939.586
A0A0H2ZU04	1244.65	1470.5	1251.51	1388.35	637.775	426.193	1423.13	1016.43	1238.29	1035.29	747.052	737.054	288.88	488.035	307.852	411.58	252.989	390.406	1357.58	1319.93	531.984	1219.78	1136.79	742.053	388.458	359.716	321.698
A0A0H2ZU05	504.908	690.031	551.646	852.391	558.49	806.48	463.835	726.193	463.784	577.732	563.528	669.275	1190.41	921.945	1251.73	875.637	1204	860.723	597.469	702.019	682.485	595.014	520.758	616.401	1056.18	1063.68	1032.36
A0A0H2ZU06	778.131	649.297	782.066	719.447	821.914	757.77	820.1	702.404	819.24	742.496	777.426	750.813	731.175	801.562	742.211	732.848	739.115	1211.5	713.714	750.757	789.842	761.252	780.868	764.119	766.369	737.53	975.306
A0A0H2ZU09	1115.7	1113.26	884.833	964.826	698.233	984.369	553.481	743.975	691.731	597.748	702.968	669.518	803.661	717.265	751.764	797.825	829.415	517.693	1114.48	924.829	841.301	648.728	644.74	686.243	760.463	774.795	673.554
A0A0H2ZU10	629.053	618.212	765.959	678.164	943.014	874.769	811.39	751.934	801.839	813.397	743.812	813.576	748.181	811.935	762.011	776.718	783.8	928.81	623.632	722.062	908.892	781.662	807.618	778.694	780.058	769.364	856.305
A0A0H2ZU11	846.89	850.508	1021.89	961.106	761.968	791.582	760.638	715.282	742.771	866.264	776.023	801.406	743.054	722.126	677.869	687.837	731.186	745.381	848.699	991.499	776.775	737.96	804.518	788.715	732.59	682.853	738.283
A0A0H2ZU12	904.847	1060.77	811.747	780.145	716.504	902.16	632.93	857.236	711.884	830.027	785.54	933.463	775.602	637.839	769.394	656.684	869.463	543.97	982.807	795.946	809.332	745.083	770.955	859.501	706.72	713.039	706.716
A0A0H2ZU14	610.115	589.607	602.425	535.235	780.308	714.786	954.582	815.9	917.652	873.059	910.01	867.824	753.354	738.563	743.103	773.83	673.709	1171.2	599.861	568.83	747.547	885.241	895.356	888.917	745.958	758.466	922.455
A0A0H2ZU16	769.025	657.218	763.518	691.247	588.907	700.78	589.534	775.193	574.609	613.017	641.21	667.027	1013.69	1021.05	976.397	900.191	987.618	918.594	713.121	727.383	644.843	682.364	593.813	654.118	1017.37	938.294	953.106
A0A0H2ZU18	690.969	570.261	1041.85	1179.54	628.241	577.463	811.604	747.372	813.414	1365.14	772.585	1236.12	729.197	854.269	778.947	454.125	766.387	250.282	630.615	1110.69	602.852	779.488	1089.28	1004.35	791.733	616.536	508.335
A0A0H2ZU19	786.463	813.311	556.27	379.203	1128.33	1077.67	827.939	926.15	982.515	1034.86	768.733	957.527	658.781	677.883	645.369	570.598	658.226	800.095	799.887	467.736	1103	877.045	1008.69	863.13	668.332	607.984	729.16
A0A0H2ZU20	720.961	665.711	746.819	651.699	883.603	833.038	900.873	856.463	927.34	858.106	860.851	861.633	612.313	886.976	668.718	766.427	696.716	689.181	693.336	699.259	858.32	878.668	892.723	861.242	749.645	717.572	692.949
A0A0H2ZU21	1090.79	1165.04	787.804	896.577	901.887	830.946	657.086	707.91	717.224	538.227	809.049	678.41	701.98	622.736	649.445	1019.72	732.557	568.847	1127.91	842.191	866.417	682.498	627.725	743.73	662.358	834.582	650.702
A0A0H2ZU22	879.488	740.718	646.229	639.363	718.326	741.689	531.019	850.921	629.636	652.256	911.762	744.638	872.635	917.862	904.974	1078.78	804.944	554.652	810.103	642.796	730.008	690.97	640.946	828.2	895.248	991.878	679.798
A0A0H2ZU25	821.346	859.5	746.353	652.005	984.552	957.582	907.225	1024.1	963.783	1028.23	964.139	1035.35	544.577	621.044	547.396	579.191	574.485	497.309	840.423	699.179	971.067	965.664	996.007	999.746	582.81	563.294	535.897
A0A0H2ZU26	484.877	720.792	624.604	659.833	623.889	915.036	566.915	1024.93	663.824	811.419	649.2	1055.54	1082.75	852.051	1087.36	710.378	1027.4	369.219	602.835	642.218	769.463	795.922	737.621	852.371	967.4	898.87	698.309
A0A0H2ZU27	205.311	500.75	902.453	799.031	262.998	137.63	864.447	984.003	978.492	1004.29	939.778	885.875	1065.78	1441.39	1028.36	934.401	605.64	167.781	353.03	850.742	200.314	924.225	991.392	912.827	1253.58	981.381	386.711
A0A0H2ZU28	1038.57	888.104	1124.4	960.839	497.143	466.497	877.81	700.639	761.559	755.264	786.13	721.627	685.418	706.859	734.599	696.497	624.861	1209.89	963.338	1042.62	481.82	789.224	758.411	753.879	696.139	715.548	917.374
A0A0H2ZU29	663.868	751.236	753.703	715.288	856.829	880.676	974.09	984.071	928.496	1016.17	894.388	958.257	638.567	651.191	671.557	596.364	636.909	668.629	707.552	734.495	868.752	979.081	972.333	926.322	644.879	633.961	652.769
A0A0H2ZU30	327.118	658.487	337.268	746.684	694.227	885.524	420.231	830.314	535.812	448.049	646.123	534.961	1226.98	1040.66	1056.54	992.588	1394.31	764.409	492.802	541.976	789.876	625.272	491.93	590.542	1133.82	1024.56	1079.36
A0A0H2ZU31	871.015	890.587	1054.34	874.953	541.124	607.192	922.208	818.936	878.591	905.325	814.315	926.37	712.853	813.116	741.966	661.459	562.226	637.633	880.801	964.646	574.158	870.572	891.958	870.343	762.985	701.713	599.93
A0A0H2ZU32	632.188	573.034	816.142	637.051	777.948	651.962	835.3	640.121	789.978	825.982	783.685	761.918	809.496	736.47	766.896	805.041	767.144	1413.76	602.611	726.597	714.955	737.711	807.98	772.801	772.983	785.968	1090.45
A0A0H2ZU33	530.48	604.078	772.955	803.443	780.287	809.575	669.84	716.341	679.597	728.367	647.81	795.945	991.146	875.978	925.55	856.937	910.195	818.038	567.279	788.199	794.931	693.09	703.982	721.878	933.562	891.244	864.116
A0A0H2ZU34	1257.98	1269.3	1783.97	1520.04	577.814	565.604	752.445	764.274	733.581	917.51	647.78	849.003	517.951	494.21	519.23	386.992	562.37	573.629	1263.64	1652	571.709	758.359	825.546	748.392	506.08	453.111	568
A0A0H2ZU36	895.968	932.827	721.392	911.888	861.033	932.815	713.433	704.826	755.958	726.749	770.712	732.904	773.643	745.679	717.229	793.204	785.925	614.859	914.398	816.64	896.924	709.13	741.354	751.808	759.661	755.216	700.392
A0A0H2ZU39	1000.92	968.711	1009.48	1280.71	812.287	715.345	819.477	801.276	812.494	844.737	797.947	897.759	664.33	422.947	723.37	486.912	495.943	876.527	984.818	1145.1	763.816	810.376	828.615	847.853	543.638	605.141	686.235
A0A0H2ZU40	572.882	736.409	560.086	659.561	862.274	885.328	996.032	935.11	1043.83	917.84	958.708	906.001	667.177	701.422	668.118	739.803	623.697	659.499	654.645	609.823	873.801	965.571	980.837	932.354	684.299	703.96	641.598
A0A0H2ZU41	804.527	736.235	828.348	968.103	842.812	579.322	656.736	784.7	704.329	625.857	774.716	657.35	740.067	938.746	785.386	1016.58	850.499	616.823	770.381	898.225	711.067	720.718	665.093	716.033	839.407	900.984	733.661
A0A0H2ZU42	935.795	808.488	757.375	776.382	717.249	717.046	625.206	692.415	681.31	660.185	715.418	735.555	854.962	791.67	797.378	811.906	884.92	1049.08	872.141	766.879	717.148	658.81	670.747	725.487	823.316	804.642	966.999
A0A0H2ZU44	482.119	648.006	764.861	628.523	898.658	863.958	869.278	802.707	839.276	879.411	711.588	821.252	792.331	862.198	810.139	815.885	798.357	732.278	565.062	696.692	881.308	835.993	859.343	766.42	827.265	813.012	765.317
A0A0H2ZU45	817.671	645.379	622.95	602.518	824.142	733.795	956.746	744.261	938.313	775.18	939.732	802.089	648.833	872.208	664.76	967.673	594.366	827.367	731.525	612.734	778.968	850.504	856.746	870.91	760.52	816.217	710.866
A0A0H2ZU47	1455.5	1901.54	844.105	534.31	885.007	1156.66	633.48	736.913	726.412	692.612	780.708	782.483	649.962	535.813	639.123	498.263	539.461	501.99	1678.52	689.208	1020.83	685.197	709.512	781.596	592.887	568.693	520.726
A0A0H2ZU50	637.368	564.385	688.91	679.02	739.779	699.872	828.124	691.301	818.894	691.934	737.335	698.869	878.527	772.663	852.998	851.005	764.537	1361.7	600.876	683.965	719.826	759.712	755.414	718.102	825.595	852.001	1063.12
A0A0H2ZU53	446.075	609.335	573.798	660.119	1005.98	889.626	922.027	936.149	857.366	1028.61	791.033	933.312	774.198	773.538	753.655	664.405	800.724	660.997	527.705	616.958	947.802	929.088	942.989	862.172	773.868	709.03	730.86
A0A0H2ZU54	748.011	593.514	575.914	636.738	913.446	682.229	803.188	886.465	1038.65	958.464	816.511	797.092	790.459	967.489	690.547	783.912	597.344	733.982	670.763	606.326	797.838	844.826	998.555	806.802	878.974	737.229	665.663
A0A0H2ZU55	738.769	491.782	462.295	412.214	935.485	701.021	972.599	674.754	938.065	693.135	977.984	675.488	648.902	745.689	673.524	866.378	614.186	1737.74	615.276	437.254	818.253	823.676	815.6	826.736	697.295	769.951	1175.96
A0A0H2ZU57	1174.92	1096.65	1098.77	1050.11	920.517	878.3	737.279	713.893	749.278	707.584	751.802	730.011	567.789	621.946	594.645	599.488	593.15	806.237	1135.79	1074.44	899.408	725.586	728.431	740.906	594.867	597.066	699.694
A0A0H2ZU58	461.165	553.906	585.637	523.802	738.416	770.942	826.918	900.358	835.271	913.375	860.873	909.023	857.441	755.796	902.714	843.286	802.639	892.09	507.536	554.719	754.679	863.638	874.323	884.948	806.619	873	847.364
A0A0H2ZU60	768.656	613.795	675.215	671.568	890.641	802.608	744.104	774.318	802.621	677.016	849.468	753.445	787.349	828.252	650.916	881.011	788.098	1002.62	691.226	673.392	846.625	759.211	739.818	801.456	807.8	765.964	895.358
A0A0H2ZU61	365.979	1103.24	825.808	1537.54	396.105	966.992	334.328	837.147	333.825	664.922	350.054	864.334	1321.09	673.537	1237.11	455.168	1561.61	166.32	734.608	1181.67	681.549	585.737	499.374	607.194	997.315	846.141	863.963
A0A0H2ZU62	1312.81	542.514	1393.75	1184.51	242.618	320.793	1217.68	828.906	864.6	1011.7	876.591	855.285	617.965	560.34	573.605	715.753	215.255	1114.75	927.664	1289.13	281.706	1023.29	938.148	865.938	589.152	644.679	665
A0A0H2ZU63	790.181	896.65	788.389	704.477	825.655	805.312	850.586	829.68	795.938	869.951	783.433	874.593	733.692	684.12	741.401	664.617	712.613	838.853	843.416	746.433	815.484	840.133	832.944	829.013	708.906	703.009	775.733
A0A0H2ZU64	659.174	695.547	654.355	624.139	907.321	862.742	846.413	841.612	885.731	987.768	878.138	918.3	718.103	785.19	693.269	676.613	720.596	751.078	677.36	639.247	885.032	844.013	936.749	898.219	751.647	684.941	735.837
A0A0H2ZU65	671.974	559.177	600.855	576.343	970.047	907.16	826.755	776.327	917.604	835.116	804.366	890.825	752.364	738.802	671.677	764.561	745.02	1040.69	615.575	588.599	938.604	801.541	876.36	847.596	745.583	718.119	892.855
A0A0H2ZU66	882.032	509.808	460.255	441.365	408.467	418.592	955.248	826.918	1312.81	750.902	1230.08	780.263	598.931	627.489	578.167	1090.7	495.493	1495.8	695.92	450.81	413.529	891.083	1031.86	1005.17	613.21	834.431	995.647
A0A0H2ZU67	1580.72	1323.3	1275.79	964.082	691.66	896.935	720.33	985.305	596.817	606.256	574.494	741.997	642.154	568.19	596.406	422.581	611.174	797.797	1452.01	1119.94	794.298	852.818	601.537	658.246	605.172	509.494	704.485
A0A0H2ZU68	993.422	725.223	777.086	863.682	725.953	932.624	1019.62	795.889	816.687	860.744	882.166	844.821	625.878	621.165	721.11	634.443	529.594	907.072	859.323	820.384	829.288	907.754	838.716	863.494	623.521	677.776	718.333
A0A0H2ZU69	601.21	582.206	604.249	628.756	761.084	771.597	889.171	714.223	814.542	690.868	797.869	734.305	813.244	869.7	805.153	832.237	834.362	1181.43	591.708	616.502	766.34	801.697	752.705	766.087	841.472	818.695	1007.89
A0A0H2ZU70	1053.47	925.828	1048.14	977.764	607.445	589.844	798.3	738.195	772.432	815.341	708.802	754.908	754.809	754.282	698.918	696.513	670.185	865.849	989.647	1012.95	598.645	768.247	793.886	731.855	754.546	697.715	768.017
A0A0H2ZU73	709.147	716.627	671.693	738.19	1385.93	908.523	719.511	764.065	795.119	876.439	702.487	846.863	748.001	778.525	607.971	673.808	687.742	830.071	712.887	704.941	1147.22	741.788	835.779	774.675	763.263	640.89	758.907
A0A0H2ZU75	872.651	682.261	693.241	760.571	650.996	722.267	872.908	779.566	1086.8	732.487	1118.51	790.515	579.615	876.802	588.364	858.196	531.438	809.537	777.456	726.906	686.632	826.237	909.641	954.511	728.209	723.28	670.487
A0A0H2ZU76	692.025	781.296	613.053	645.318	907.13	929.137	700.191	883.017	737.763	728.568	732.082	808.902	930.058	797.702	829.848	886.487	784.667	585.789	736.661	629.186	918.133	791.604	733.165	770.492	863.88	858.168	685.228
A0A0H2ZU77	1075.9	871.04	986.314	944.068	797.934	655.535	800.621	688.901	755.087	818.379	804.655	883.781	619.587	599.569	628.403	676.252	653.842	1021.3	973.47	965.191	726.735	744.761	786.733	844.218	609.578	652.328	837.571
A0A0H2ZU78	877.04	709.35	747.236	679.109	746.933	781.79	768.809	770.835	833.691	856.293	773.488	813.72	721.624	802.829	791.077	787.332	746.77	871.527	793.195	713.173	764.361	769.822	844.992	793.604	762.226	789.205	809.149
A0A0H2ZU79	666.322	667.545	673.926	623.48	876.595	804.248	752.301	757.476	831.813	818.102	807.988	797.317	773.965	779.731	741.857	741.275	818.233	1096.85	666.934	648.703	840.421	754.888	824.957	802.653	776.848	741.566	957.543
A0A0H2ZU80	901.723	911.367	1006.12	873.354	565.144	592.268	798.216	887.162	877.3	1109.24	827.604	1001.57	763.085	667.495	706.18	616.343	616.72	553.935	906.545	939.735	578.706	842.689	993.268	914.586	715.29	661.262	585.328
A0A0H2ZU81	2306.45	2048.83	1264.03	846.836	453.329	462.828	677.937	463.728	574.82	448.148	628.168	405.31	387.129	992.73	557.245	884.297	560.42	463.181	2177.64	1055.43	458.079	570.833	511.484	516.739	689.929	720.771	511.8
A0A0H2ZU84	890.579	798.506	514.496	725.95	722.847	850.53	615.251	803.238	668.765	606.455	766.284	692.059	935.392	668.532	877.203	817.825	896.998	1110.89	844.543	620.223	786.688	709.244	637.61	729.171	801.962	847.514	1003.95
A0A0H2ZU85	649.005	543.885	716.187	512.398	915.871	784.17	777.091	666.826	727.148	884.369	739.154	850.601	744.606	700.039	854.572	478.584	842.504	1767.72	596.445	614.293	850.021	721.958	805.759	794.877	722.322	666.578	1305.11
A0A0H2ZU87	1409.62	1228.82	1010.62	764.755	753.494	769.432	726.815	813.025	772.147	971.897	764.585	881.704	613.271	631.579	565.27	598.46	572.145	581.562	1319.22	887.687	761.463	769.92	872.022	823.145	622.425	581.865	576.854
A0A0H2ZU88	345.377	214.734	510.322	343.529	952.519	825.076	1149.95	924.195	820.638	1332.55	718.808	1312.98	733.874	615.991	816.237	399.539	879.21	1318.09	280.055	426.926	888.798	1037.07	1076.6	1015.89	674.932	607.888	1098.65
A0A0H2ZU91	826.995	628.272	720.164	618.92	834.789	733.282	840.823	757.606	824.388	815.648	792.943	812.108	703.478	773.473	716.617	816.797	749.281	1095.13	727.634	669.542	784.036	799.215	820.018	802.525	738.476	766.707	922.205
A0A0H2ZU92	554.128	594.308	752.373	771.153	920.071	873.781	812.867	847.979	857.724	894.671	714.93	910.249	794.423	758.759	746.376	774.594	814.247	671.541	574.218	761.763	896.926	830.423	876.197	812.59	776.591	760.485	742.894
A0A0H2ZU93	788.827	791.218	1115.29	1040.48	615.455	627.054	768.517	746.494	787.988	759.203	751.449	781.792	782.157	741.943	753.968	767.399	701.243	826.702	790.022	1077.89	621.254	757.505	773.596	766.621	762.05	760.684	763.972
A0A0H2ZU95	607.843	642.365	691.803	539.118	681.732	783.593	884.834	839.525	979.509	924.61	989.202	919.856	669.513	852.299	717.068	788.268	716.072	779.333	625.104	615.461	732.663	862.18	952.059	954.529	760.906	752.668	747.703
A0A0H2ZU96	890.317	691.82	872.166	873.304	591.443	571.892	862.951	888.003	928.449	1078.93	880.036	913.91	666.178	707.886	735.813	666.643	617.466	767.113	791.069	872.735	581.668	875.477	1003.69	896.973	687.032	701.228	692.289
A0A0H2ZU97	646.032	795.153	668.275	671.846	802.615	761.98	837.769	825.098	870.831	823.561	832.996	774.55	727.612	748.857	868.14	741.014	706.153	963.692	720.592	670.061	782.297	831.434	847.196	803.773	738.234	804.577	834.923
A0A0H2ZU99	296.328	908.455	386.902	690.512	345.153	606.224	530.952	1063.9	534.347	501.475	797.602	664.099	1109.96	1000.64	1390.39	1226.21	1246.09	187.997	602.391	538.707	475.689	797.426	517.911	730.851	1055.3	1308.3	717.046
A0A0H2ZUA0	350.969	495.189	326.268	485.256	554.414	643.801	378.682	817.78	542.952	641.641	883.549	719.087	1374.8	1108.27	1042.4	1247.15	1147.79	625.793	423.079	405.762	599.108	598.231	592.296	801.318	1241.54	1144.77	886.791
A0A0H2ZUA2	737.167	796.374	783.13	718.623	929.63	922.035	802.508	787.766	772.295	807.264	788.247	764.436	704.614	785.546	728.641	762.067	763.198	753.912	766.77	750.877	925.832	795.137	789.779	776.342	745.08	745.354	758.555
A0A0H2ZUA3	540.021	655.282	667.138	698.803	836.881	835.383	826.247	807.65	852.433	948.867	794.181	877.351	790.497	832.418	777.952	678.172	839.456	786.805	597.652	682.971	836.132	816.948	900.65	835.766	811.457	728.062	813.13
A0A0H2ZUA5	732.028	705.738	660.427	638.668	1021.34	821.567	845.146	702.23	827.212	691.594	828.368	683.166	644.08	781.169	725.921	985.213	718.039	970.416	718.883	649.547	921.454	773.688	759.403	755.767	712.625	855.567	844.227
A0A0H2ZUA8	788.168	666.751	1112.26	2265.33	835.421	482.352	500.653	542.454	659.606	455.09	554.937	528.942	845.151	564.567	646.394	932.052	1074.32	568.334	727.46	1688.79	658.886	521.553	557.348	541.94	704.859	789.223	821.326
A0A0H2ZUB0	1025.66	1024.11	732.172	1026.72	635.624	830.157	514.351	743.333	776.171	799.035	925.691	782.468	794.805	757.685	817.894	722.477	728.943	447.881	1024.88	879.447	732.891	628.842	787.603	854.079	776.245	770.185	588.412
A0A0H2ZUB1	896.484	930.392	839.123	962.152	804.7	751.528	860.918	803.101	871.604	793.458	884.606	818.828	675.986	697.995	623.794	715.763	600.579	665.195	913.438	900.637	778.114	832.009	832.531	851.717	686.991	669.778	632.887
A0A0H2ZUB2	488.142	427.133	539.219	500.021	962.217	707.694	862.258	619.801	911.501	668.482	851.292	679.218	794.966	608.724	752.027	672.431	746.045	2205.29	457.638	519.62	834.955	741.03	789.991	765.255	701.845	712.229	1475.67
A0A0H2ZUB3	596.806	587.778	675.681	651.593	895.66	953.508	725.807	773.396	725.866	784.46	698.753	768.742	880.514	839.338	865.266	891.751	862.893	768.136	592.292	663.637	924.584	749.602	755.163	733.748	859.926	878.509	815.514
A0A0H2ZUB4	540.12	475.957	517.126	706.647	538.801	1296.8	460.584	595.873	569.151	552.907	594.528	607.089	1234.5	762.679	1140.76	989.476	1151.39	985.24	508.038	611.887	917.8	528.228	561.029	600.808	998.589	1065.12	1068.31
A0A0H2ZUB6	864.268	708.006	747.877	616.198	1068.13	970.745	1102.66	903.091	923.178	846.293	939.808	869.766	509.771	679.012	521.576	615.864	445.413	974.114	786.137	682.037	1019.44	1002.88	884.735	904.787	594.391	568.72	709.763
A0A0H2ZUB7	869.145	531.27	661.427	573.448	865.51	1155.42	1142.94	730.246	830.974	806.306	951.596	893.331	547.532	483.419	570.951	591.711	621.343	1450.25	700.207	617.438	1010.47	936.594	818.64	922.463	515.475	581.331	1035.8
A0A0H2ZUB8	597.075	560.179	612.665	592.111	956.645	865.014	701.663	616.871	749.215	617.943	761.921	579.45	833.344	866.029	853.996	784.41	846.424	1526.88	578.627	602.388	910.83	659.267	683.579	670.685	849.687	819.203	1186.65
A0A0H2ZUB9	736.856	728.256	609.291	672.862	807.047	944.351	744.878	894.339	768.812	665.468	844.716	878.18	868.163	850.416	737.864	888.014	801.354	505.438	732.556	641.076	875.699	819.608	717.14	861.448	859.289	812.939	653.396
A0A0H2ZUC2	1392.95	1081.24	753.983	796.198	748.838	671.916	712.794	627.054	692.339	426.065	978.254	534.409	482.37	1197.52	712.719	1093.68	624.211	410.046	1237.09	775.09	710.377	669.924	559.202	756.331	839.943	903.199	517.129
A0A0H2ZUC3	911.179	779.61	958.902	797.916	798.894	736.141	877.68	730.681	794.584	760.815	770.327	764.116	665.173	693.729	664.825	735.978	657.937	1106.01	845.395	878.409	767.517	804.18	777.7	767.222	679.451	700.401	881.975
A0A0H2ZUC4	2710.09	2671.83	1297.76	903.53	589.864	648.888	430.075	407.186	392.687	312.335	372.384	283.019	609.28	477.269	526.26	418.617	548.476	1218.66	2690.96	1100.64	619.376	418.63	352.511	327.701	543.274	472.439	883.568
A0A0H2ZUC5	1362.86	1092.01	931.353	957.121	656.392	572.377	762.065	642.48	801.802	674.931	741.883	661.256	667.884	595.594	625.263	688.16	602.628	1259.31	1227.44	944.237	614.384	702.273	738.366	701.569	631.739	656.711	930.968
A0A0H2ZUC8	825.945	957.72	1184.16	1010.68	843.769	806.057	654.931	776.779	635.612	702.351	735.383	720.816	720.422	648.417	747.421	756.17	745.013	747.383	891.832	1097.42	824.913	715.855	668.982	728.1	684.419	751.795	746.198
A0A0H2ZUC9	840.137	1064.07	732.883	1043.78	423.44	578.244	484.031	827.227	529.241	561.626	529.993	660.539	1204.49	753.457	1155.96	979.637	975.879	532.913	952.103	888.334	500.842	655.629	545.433	595.266	978.974	1067.8	754.396
A0A0H2ZUD0	631.084	587.232	670.633	660.063	822.197	812.407	723.227	701.81	698.717	689.523	712.463	678.931	875.13	886.773	868.072	896.423	914.749	1066.23	609.158	665.348	817.302	712.518	694.12	695.697	880.952	882.247	990.492
A0A0H2ZUD1	1006.73	1262.81	1182.76	1576.16	720.804	864.099	506.003	700.479	566.774	565.051	634.196	633.26	820.164	562.564	824.588	534.706	821.613	544.685	1134.77	1379.46	792.451	603.241	565.912	633.728	691.364	679.647	683.149
A0A0H2ZUD2	591.803	908.163	864.255	887.272	732.085	982.987	356.778	703.869	516.502	537.872	392.51	585.017	1074.13	983.252	1155.3	818.134	1194.75	605.636	749.983	875.764	857.536	530.323	527.187	488.763	1028.69	986.716	900.192
A0A0H2ZUD4	1340.46	989.308	999.346	850.592	744.176	706.312	862.234	757.185	796.994	730.592	772.592	751.906	590.723	660.075	552.046	680.354	540.072	1021.1	1164.88	924.969	725.244	809.71	763.793	762.249	625.399	616.2	780.588
A0A0H2ZUD5	1161.01	927.118	747.735	881.371	916.949	564.173	599.58	469.182	881.344	352.068	788.525	489.012	656.011	652.297	594.485	1533.16	710.59	883.678	1044.07	814.553	740.561	534.381	616.706	638.769	654.154	1063.82	797.134
A0A0H2ZUD6	852.755	752.977	799.038	706.838	821.376	896.221	825.495	768.02	764.727	931.487	668.909	906.662	696.969	774.247	769.731	841.55	836.566	504.044	802.866	752.938	858.799	796.757	848.107	787.785	735.608	805.64	670.305
A0A0H2ZUD7	526.916	857.536	533.067	794.325	642.617	824.945	440.69	785.18	595.219	471.226	652.595	651.679	1263.83	948.404	1130.76	1156.03	980.032	388.374	692.226	663.696	733.781	612.935	533.222	652.137	1106.12	1143.4	684.203
A0A0H2ZUD8	1126.45	1641.55	1134.36	1038.66	583.682	622.366	498.674	778.338	465.067	454.038	707.499	538.724	786.893	699.762	854.643	836.446	903.071	489.691	1384	1086.51	603.024	638.506	459.552	623.112	743.328	845.544	696.381
A0A0H2ZUD9	949.031	944.677	801.238	785.677	825.61	923.75	768.808	932.115	888.52	924.024	891.379	972.188	664.215	572.147	605.375	593.005	646.589	599.979	946.854	793.458	874.68	850.461	906.272	931.784	618.181	599.19	623.284
A0A0H2ZUE0	1344.8	1293.2	2920.28	2260.34	315.807	459.655	998.372	646.169	579.692	604.041	345.255	496.886	392.011	495.22	410.299	436.647	409.251	585.135	1319	2590.31	387.731	822.27	591.867	421.071	443.615	423.473	497.193
A0A0H2ZUE2	712.077	620.896	642.617	569.449	883.31	747.862	853.371	688.262	829.135	749.691	861.414	716.201	690.584	799.691	722.683	759.662	771.427	1399.98	666.486	606.033	815.586	770.817	789.413	788.808	745.138	741.173	1085.7
A0A0H2ZUE3	820.055	1162.36	1343.32	1985.79	687.46	532.408	689.035	454.71	650.18	391.374	669.007	361.525	734.468	837.884	760.845	889.997	769.419	371.318	991.209	1664.56	609.934	571.872	520.777	515.266	786.176	825.421	570.368
A0A0H2ZUE4	2291.42	1806.72	2267.58	1377.78	421.881	481.679	597.036	583.79	498.225	705.952	405.648	616.474	460.363	574.191	415.96	520.058	317.746	603.982	2049.07	1822.68	451.78	590.413	602.089	511.061	517.277	468.009	460.864
A0A0H2ZUE5	800.498	879.084	544.441	949.557	665.895	760.748	410.269	749.901	633.811	606.251	724.292	637.735	1018.15	842.653	876.187	1056.91	1135.26	466.037	839.791	746.999	713.322	580.085	620.031	681.014	930.403	966.547	800.648
A0A0H2ZUE7	828.939	860.326	714.301	854.347	687.351	766.422	533.243	788.625	665.7	694.725	790.719	880.531	757.936	850.169	939.501	774.007	991.829	598.806	844.632	784.324	726.886	660.934	680.213	835.625	804.053	856.754	795.317
A0A0H2ZUE8	860.919	870.735	601.499	550.149	767.59	706.489	715.239	658.315	731.305	716.695	679.533	656.536	850.112	806.42	858.017	737.979	882.15	1365.84	865.827	575.824	737.039	686.777	724	668.034	828.266	797.998	1123.99
A0A0H2ZUE9	816.6	684.945	672.74	588.673	803.166	783.376	897.319	882.076	892.327	1061.82	905.59	952.643	727.642	624.89	696.842	637.285	592.036	980.166	750.772	630.706	793.271	889.697	977.071	929.116	676.266	667.063	786.101
A0A0H2ZUF0	711.054	781.02	691.002	661.046	946.321	890.004	891.807	958.026	947.253	1161.08	837.519	1069.4	658.96	730.872	639.296	572.034	685.327	410.494	746.037	676.024	918.162	924.917	1054.17	953.46	694.916	605.665	547.91
A0A0H2ZUF1	708.892	743.156	763.382	792.443	832.905	830.677	825.164	810.038	839.891	794.421	825.566	785.526	790.04	769.992	720.174	720.185	684.742	861.204	726.024	777.913	831.791	817.601	817.156	805.546	780.016	720.18	772.973
A0A0H2ZUF2	2138.95	1944.97	2008.93	1794.67	322.237	339.229	629.295	639.568	582.097	681.564	527.336	596.513	498.546	509.807	513.422	449.833	341.073	363.486	2041.96	1901.8	330.733	634.432	631.831	561.925	504.177	481.628	352.279
A0A0H2ZUF3	1743.71	1422.81	1522.58	1078.5	426.317	482.504	1220.01	890.672	786.034	937.229	509.854	545.315	440.873	625.885	457.352	611.758	380.955	636.186	1583.26	1300.54	454.41	1055.34	861.632	527.585	533.379	534.555	508.571
A0A0H2ZUF4	1186.19	1472.04	840.115	631.83	696.542	674.357	876.907	928.424	842.201	991.449	784.494	938.306	636.384	583.674	625.937	493.579	627.273	599.321	1329.12	735.972	685.449	902.665	916.825	861.4	610.029	559.758	613.297
A0A0H2ZUF5	738.05	639.102	804.171	633.321	787.003	739.239	888.059	765.503	873.082	879.923	878.32	835.63	687.056	773.431	711.67	771.476	650.685	1040.24	688.576	718.746	763.121	826.781	876.502	856.975	730.244	741.573	845.462
A0A0H2ZUF6	784.439	1121.59	827.305	1044.27	637.878	790.206	519.893	755.507	469.428	560.942	632.688	650.242	958.993	828.662	1034.09	847.14	1048.92	450.842	953.017	935.786	714.042	637.7	515.185	641.465	893.827	940.615	749.884
A0A0H2ZUF8	1986.79	1096.14	1065.79	959.313	765.289	634.82	774.279	757.817	779.455	743.946	793.779	821.054	411.051	585.258	414.926	668.466	362.034	910.379	1541.47	1012.55	700.054	766.048	761.7	807.416	498.154	541.696	636.207
A0A0H2ZUF9	705.448	634.18	707.346	683.19	811.417	812.48	688.035	563.779	682.521	584.092	609.383	544.182	967.439	855.671	898.431	836.136	872.217	1474.41	669.814	695.268	811.948	625.907	633.307	576.782	911.555	867.283	1173.31
A0A0H2ZUG0	1068.91	746.416	909.134	593.607	845.278	703.075	771.307	687.288	859.503	760.999	793.422	669.575	611.807	665.654	595.193	757.253	652.828	1504.82	907.663	751.371	774.177	729.297	810.251	731.499	638.731	676.223	1078.82
A0A0H2ZUG1	714.076	603.181	666.939	643.895	797.102	835.848	834.252	811.478	832.194	946.607	837.814	908.636	733.687	793.527	792.231	711.28	754.489	857.752	658.629	655.417	816.475	822.865	889.401	873.225	763.607	751.755	806.12
A0A0H2ZUG3	611.968	767.231	688.046	707.429	823.738	864.548	825.341	855.59	857.552	874.812	823.125	922.44	778.094	718.162	756.441	706.253	781.005	725.997	689.599	697.738	844.143	840.466	866.182	872.782	748.128	731.347	753.501
A0A0H2ZUG4	1269.39	1147.05	695.098	891.802	1078.11	1011.95	673.425	793.603	900.578	791.115	886.899	808.416	646.059	609.443	517.74	675.331	443.286	477.811	1208.22	793.45	1045.03	733.514	845.847	847.658	627.751	596.536	460.548
A0A0H2ZUG5	567.942	459.025	564.7	473.968	937.163	627.867	806.523	664.157	883.675	690.039	788.591	679.794	830.546	780.068	715.182	835.622	818.151	1783.98	513.483	519.334	782.515	735.34	786.857	734.192	805.307	775.402	1301.07
A0A0H2ZUG6	584.277	566.978	473.067	511.622	660.704	825.716	814.566	745.221	726.696	789.763	820.653	741.233	941.344	963.691	852.553	1001.13	959.443	791.549	575.628	492.344	743.21	779.894	758.23	780.943	952.517	926.841	875.496
A0A0H2ZUG8	619.797	596.186	723.219	876.056	981.954	904.721	1010.26	842.205	903.336	958.719	882.322	902.456	625.484	740.543	640.108	727.894	637.353	580.019	607.991	799.637	943.338	926.23	931.028	892.389	683.013	684.001	608.686
A0A0H2ZUH0	980.965	764.595	1030.74	1127.79	697.183	645.253	843.096	604.965	786.04	728.822	724.571	753.651	699.425	592.305	696.262	631.022	658.055	1302.9	872.78	1079.27	671.218	724.03	757.431	739.111	645.865	663.642	980.48
A0A0H2ZUH1	501.711	638.508	629.327	699.981	800.834	797.222	882.957	870.996	931.097	875.731	848.253	935.854	792.778	774.195	754.424	704.915	774.386	819.284	570.11	664.654	799.028	876.977	903.414	892.053	783.487	729.67	796.835
A0A0H2ZUH2	1293.85	1147.18	1298.01	1115.2	687.733	803.884	917.742	860.699	807.639	765.593	834.303	725.597	453.798	541.595	450.282	490.036	525.367	827.619	1220.52	1206.61	745.808	889.22	786.616	779.95	497.696	470.159	676.493
A0A0H2ZUH3	609.341	539.052	667.597	545.137	768.072	747.289	832.552	733.745	771.416	829.795	774.022	801.97	813.752	916.112	898.84	828.121	800.629	1067.55	574.197	606.367	757.681	783.148	800.606	787.996	864.932	863.481	934.091
A0A0H2ZUH4	1301.82	1508.79	1246.7	812.28	642.828	770.775	576.049	755.225	568.211	843.443	549.208	787.062	769.498	554.622	740.478	431.78	781.256	859.14	1405.3	1029.49	706.801	665.637	705.827	668.135	662.06	586.129	820.198
A0A0H2ZUH6	570.191	722.924	655.539	771.494	896.402	900.939	758.181	745.667	684.041	764.573	814.657	794.327	838.095	721.422	851.843	657.652	843.268	1057.56	646.557	713.517	898.67	751.924	724.307	804.492	779.759	754.747	950.415
A0A0H2ZUH7	656.156	813.59	707.342	699.573	918.642	957.175	763.856	807.217	753.529	752.055	746.235	741.958	792.258	810.072	806.538	819.704	816.616	668.376	734.873	703.458	937.908	785.536	752.792	744.096	801.165	813.121	742.496
A0A0H2ZUH9	1138.17	838.041	833.658	543.316	830.584	813.66	833.049	872.115	917.295	1165.71	796.965	1270.05	719.237	493.789	583.301	468.131	470.448	855.62	988.105	688.487	822.122	852.582	1041.5	1033.51	606.513	525.716	663.034
A0A0H2ZUI0	740.554	663.583	720.44	702.425	1037.17	717.286	910.288	682.938	890.03	763.964	818.406	722.016	714.541	640.086	621.216	796.34	587.98	1388.46	702.068	711.432	877.227	796.613	826.997	770.211	677.313	708.778	988.219
A0A0H2ZUI2	990.756	771.961	771.914	751.689	786.323	755.139	861.223	820.792	862.117	789.122	884.893	855.114	668.11	581.225	666.41	812.421	570.145	974.498	881.359	761.802	770.731	841.007	825.619	870.004	624.668	739.416	772.322
A0A0H2ZUI4	863.29	731.626	967.754	870.072	663.082	659.963	747.987	791.215	836.171	853.775	783.845	874.313	744.789	683.288	721.736	637.564	714.869	1050.83	797.458	918.913	661.522	769.601	844.973	829.079	714.038	679.65	882.851
A0A0H2ZUI5	770.064	686.779	1330.14	1133.68	248.737	315.078	2783.24	2312.75	1600.26	2180.21	481.658	467.693	117.578	182.934	134.156	167.61	111.437	193.446	728.421	1231.91	281.907	2548	1890.24	474.675	150.256	150.883	152.442
A0A0H2ZUI6	271.35	541.41	356.357	411.061	675.556	674.261	542.696	734.016	947.784	798.886	1434.25	706.497	898.438	565.322	881.966	1019.23	658.515	1547.97	406.38	383.709	674.909	638.356	873.335	1070.37	731.88	950.6	1103.24
A0A0H2ZUI7	505.192	757.178	873.752	525.157	637.515	903.328	651.442	834.854	633.549	1054.75	538.974	997.429	925.666	718.005	1009	584.907	1129.39	830.991	631.185	699.455	770.422	743.148	844.151	768.202	821.836	796.953	980.193
A0A0H2ZUI8	728.474	674.364	757.554	760.138	968.973	887.669	801.665	735.309	854.354	778.297	852.845	764.219	648.506	754.047	694.828	723.666	703.395	1022.33	701.419	758.846	928.321	768.487	816.325	808.532	701.277	709.247	862.865
A0A0H2ZUI9	1168.16	1195.96	1009.6	646.642	947.673	1171.76	694.515	886.86	722.333	723.95	790.235	864.57	642.316	614.254	663.585	618.372	519.98	515.365	1182.06	828.12	1059.72	790.687	723.141	827.403	628.285	640.978	517.672
A0A0H2ZUJ0	680.515	980.174	1304.94	1973.43	424.234	536.239	1646.49	806.941	993.362	814.391	535.907	469.441	575.778	720.517	546.276	558.021	570.031	332.177	830.345	1639.19	480.237	1226.72	903.877	502.674	648.148	552.148	451.104
A0A0H2ZUJ2	814.2	981.926	632.094	1068.69	742.661	674.738	643.658	669.424	805.428	333.283	809.908	489.639	799.429	829.523	698.981	1394.1	961.912	351.295	898.063	850.39	708.699	656.541	569.355	649.773	814.476	1046.54	656.603
A0A0H2ZUJ3	924	880.372	1065.65	1028.1	886.704	766.569	779.728	700.067	772.003	779.469	735.834	772.539	681.855	713.862	653.959	708.187	626.811	777.133	902.186	1046.87	826.636	739.898	775.736	754.187	697.859	681.073	701.972
A0A0H2ZUJ5	818.78	711.346	800.057	788.91	832.985	772.2	765.211	749.55	758.153	780.521	774.646	839.9	800.842	720.082	755.652	728	705.649	1014.01	765.063	794.483	802.592	757.381	769.337	807.273	760.462	741.826	859.83
A0A0H2ZUJ6	352.679	391.787	391.739	225.025	575.761	691.748	383.949	644.184	596.608	623.747	750.067	699.732	1203.96	841.959	886.583	1607.31	1474.56	958.036	372.233	308.382	633.754	514.066	610.177	724.899	1022.96	1246.95	1216.3
A0A0H2ZUJ9	817.906	867.687	1010.59	843.161	811.15	853.579	747.982	736.815	718.376	786.934	707.175	812.981	745.475	790.293	759.153	793.972	747.282	599.295	842.797	926.878	832.364	742.398	752.655	760.078	767.884	776.563	673.288
A0A0H2ZUK1	699.094	750.501	882.596	809.238	718.002	861.273	786.022	778.307	726.852	765.036	848.006	880.181	753.97	782.606	790.541	775.397	781.077	682.695	724.798	845.917	789.638	782.164	745.944	864.094	768.288	782.969	731.886
A0A0H2ZUK2	891.582	858.746	1633.98	1656.43	282.088	479.335	971.218	593.257	635.371	598.023	325.688	447.298	783.455	903.805	917.713	807.266	807.201	658.33	875.164	1645.2	380.711	782.238	616.697	386.493	843.63	862.49	732.766
A0A0H2ZUK3	742.051	595.984	680.449	516.126	831.567	757.604	851.316	765.936	871.499	810.612	857.354	769.108	690.699	772.871	725.672	719.679	730.993	1375.01	669.017	598.287	794.585	808.626	841.056	813.231	731.785	722.676	1053
A0A0H2ZUK4	678.696	755.617	747.54	755.054	840.739	801.591	749.454	728.408	719.683	732.098	698.116	741.715	838.344	836.267	802.452	844.536	883.055	837.537	717.157	751.297	821.165	738.931	725.891	719.916	837.305	823.494	860.296
A0A0H2ZUK5	810.523	779.266	778.455	834.936	819.846	935.835	728.446	792.674	700.979	729.788	796.933	834.184	801.227	700.685	819.067	911.403	735.492	537.482	794.895	806.695	877.841	760.56	715.383	815.559	750.956	865.235	636.487
A0A0H2ZUK6	777.398	769.144	569.097	788.486	620.338	827.156	527.462	782.139	674.767	524.431	760.876	793.673	954.395	979.904	928.442	1018.93	1026.92	440.018	773.271	678.791	723.747	654.8	599.599	777.274	967.149	973.685	733.468
A0A0H2ZUK8	904.964	681.423	757.835	761.3	996.841	954.015	764.167	776.223	795.469	916.947	778.675	914.022	719.851	602.415	661.305	682.305	666.793	886.239	793.193	759.567	975.428	770.195	856.208	846.348	661.133	671.805	776.516
A0A0H2ZUK9	1297.38	1452.38	1482.99	1472.35	670.783	784.439	805.983	604.546	706.27	739.758	617.2	677.467	587.281	493.236	567.259	533.728	569.308	524.197	1374.88	1477.67	727.611	705.265	723.014	647.333	540.259	550.494	546.753
A0A0H2ZUL0	508.386	635.906	511.49	572.195	622.924	800.944	723.286	735.721	580.692	682.64	797.865	743.473	864.009	1358.65	1093.23	965.097	1101.24	365.262	572.146	541.842	711.934	729.504	631.666	770.669	1111.33	1029.16	733.249
A0A0H2ZUL1	604.56	380.175	405.114	446.433	616.395	596.736	533.869	672.617	685.703	504.306	578.475	562.105	1160.5	680.712	1110.14	771.568	1077.43	2391.39	492.368	425.773	606.565	603.243	595.005	570.29	920.606	940.854	1734.41
A0A0H2ZUL2	627.557	833.814	812.233	868.425	717.912	793.263	739.97	820.738	749.384	710.299	765.04	888.376	804.775	721.173	878.273	880.001	853.552	543.87	730.686	840.329	755.588	780.354	729.842	826.708	762.974	879.137	698.711
A0A0H2ZUL3	642.034	854.857	577.776	718.09	555.864	539.191	408.201	755.606	507.899	402.523	578.953	398.718	1360.39	952.744	1057.03	1597.44	1081.36	456.365	748.446	647.933	547.527	581.904	455.211	488.835	1156.57	1327.24	768.862
A0A0H2ZUL5	670.029	948.038	748.598	857.268	886.92	678.19	869.117	821.731	923.963	735.349	844.88	650.638	728.197	650.913	664.802	730.175	663.205	1054.99	809.034	802.933	782.555	845.424	829.656	747.759	689.555	697.489	859.097
A0A0H2ZUL6	975.649	644.918	1016.18	741.137	1285.59	1053.3	881.495	1132.36	903.738	1053.54	684.488	682.561	621.964	524.622	391.699	794.505	454	557.675	810.284	878.658	1169.45	1006.93	978.64	683.524	573.293	593.102	505.837
A0A0H2ZUL7	889.58	821.023	986.936	866.201	813.557	754.947	764.533	739.411	833.269	898.189	762.138	881.855	657.134	692.898	692.282	584.766	685.828	946.926	855.301	926.569	784.252	751.972	865.729	821.997	675.016	638.524	816.377
A0A0H2ZUL8	609.15	578.484	650.943	567.984	800.299	749.802	894.31	838.953	849.493	887.481	810.827	841.683	808.69	861.394	796.26	926.02	729.848	750.719	593.817	609.464	775.05	866.632	868.487	826.255	835.042	861.14	740.284
A0A0H2ZUL9	3128.67	2157.89	2512.7	840.802	265.271	257.714	475.971	350.433	379.183	346.726	356.142	290.113	266.471	1145.52	263.256	1248.86	233.792	184.324	2643.28	1676.75	261.492	413.202	362.954	323.127	705.998	756.059	209.058
A0A0H2ZUM0	1466.46	921.611	1481.95	684.353	417.775	801.62	879.644	757.738	925.348	708.965	758.316	819.478	534.212	680.912	497.759	890.682	372.169	797.77	1194.03	1083.15	609.698	818.691	817.156	788.897	607.562	694.221	584.97
A0A0H2ZUM1	820.349	720.798	541.045	542.506	736.035	665.74	889.293	681.419	891.857	664.88	953.77	680.167	800.651	829.335	726.492	1082.71	592.976	1050.35	770.573	541.776	700.888	785.356	778.368	816.968	814.993	904.599	821.665
A0A0H2ZUM4	982.886	737.085	601.022	671.047	671.914	572.085	612.696	626.714	670.198	468.607	745.017	505.186	949.867	934.57	818.901	1289.11	870.896	982.04	859.986	636.035	621.999	619.705	569.402	625.102	942.219	1054.01	926.468
A0A0H2ZUM5	1056.58	1129.07	927.708	1468.98	715.013	584.32	444.116	390.75	600.446	303.387	472.582	330.753	942.822	824.559	721.791	1049.73	1116.64	826.556	1092.83	1198.34	649.667	417.433	451.917	401.668	883.69	885.763	971.599
A0A0H2ZUM8	1974.43	1290.72	1081.98	985.2	627.495	689.927	779.914	726.58	771.664	783.044	749.67	707.741	426.458	482.919	498.308	450.852	429.175	1181.99	1632.58	1033.59	658.711	753.247	777.354	728.705	454.688	474.58	805.582
A0A0H2ZUM9	655.027	772.617	759.404	713.145	862.467	827.845	819.132	838.793	824.869	833.927	791.906	784.081	703.871	772.788	765.242	759.676	799.51	796.729	713.822	736.274	845.156	828.963	829.398	787.994	738.33	762.459	798.119
A0A0H2ZUN0	664.228	730.121	635.934	611.842	800.075	842.592	885.386	889.484	846.984	906.706	827.705	836.168	739.079	802.656	785.135	807.419	769.703	657.155	697.175	623.888	821.333	887.435	876.845	831.937	770.867	796.277	713.429
A0A0H2ZUN1	763.999	550.061	401.932	376.622	987.079	803.657	804.686	772.326	984.652	725.186	1113.81	784.362	698.15	876.578	611.098	1150.38	549.801	851.513	657.03	389.277	895.368	788.506	854.919	949.086	787.364	880.737	700.657
A0A0H2ZUN2	1406.82	1265.71	1134.83	887.913	671.862	758.2	701.215	712.829	677.249	845.165	676.695	791.518	641.922	651.641	624.643	617.944	665.871	680.389	1336.27	1011.37	715.031	707.022	761.207	734.106	646.781	621.293	673.13
A0A0H2ZUN3	711.686	803.658	564.418	783.115	1072.74	973.095	989.105	821.485	976.212	984.029	986.281	881.242	566.233	555.431	570.488	514.621	571.84	951.479	757.672	673.767	1022.92	905.295	980.12	933.761	560.832	542.554	761.66
A0A0H2ZUN4	899.451	1013.27	890.741	906.106	894.057	892.845	757.555	810.766	782.609	849.109	816.187	798.186	667.489	645.962	685.443	641.402	670.314	641.256	956.36	898.423	893.451	784.16	815.859	807.186	656.725	663.423	655.785
A0A0H2ZUN7	699.969	693.57	644.589	656.659	971.161	854.132	814.07	759.927	895.676	806.651	804.997	823.785	760.2	721.467	685.237	711.898	702.152	1087.04	696.769	650.624	912.647	786.999	851.163	814.391	740.833	698.567	894.595
A0A0H2ZUN9	659.533	703.351	599.768	715.268	775.311	805.584	751.136	878.723	816.76	813.946	848.607	964.745	824.545	804.095	798.387	783.544	828.394	613.114	681.442	657.518	790.447	814.93	815.353	906.676	814.32	790.966	720.754
A0A0H2ZUP0	1998.3	2544.04	2576.71	2332.06	387.804	400.577	458.856	497.242	411.057	467.943	371.439	399.402	479.201	256.843	634.813	238.559	350.81	340.949	2271.17	2454.38	394.191	478.049	439.5	385.42	368.022	436.686	345.88
A0A0H2ZUP2	866.699	689.07	809.183	808.34	955.395	952.2	832.16	745.56	848.516	907.324	733.259	904.642	690.358	744.058	650.004	690.415	680.488	698.55	777.885	808.761	953.797	788.86	877.92	818.95	717.208	670.209	689.519
A0A0H2ZUP6	1031.4	1071.07	935.155	1173.83	767.546	812.942	863.324	970.903	877.499	841.317	818.123	943.646	673.868	498.204	621.457	590.703	530.872	363.86	1051.23	1054.49	790.244	917.114	859.408	880.884	586.036	606.08	447.366
A0A0H2ZUP7	1584.48	1519.99	1105.78	927.673	678.911	662.234	740.101	767.931	685.011	820.109	657.41	714.428	587.933	581.922	597.22	655.216	610.885	577.055	1552.24	1016.73	670.572	754.016	752.56	685.919	584.928	626.218	593.97
A0A0H2ZUP8	860.16	799.591	967.074	853.711	661.753	648.692	780.149	763.833	789.676	808.305	768.744	749.609	724.26	718.77	745.267	744.927	749.858	1012.51	829.875	910.393	655.222	771.991	798.99	759.176	721.515	745.097	881.183
A0A0H2ZUQ0	1348.04	1235.1	1958.5	2234.61	232.513	261.365	707.426	830.677	672.154	575.735	568.059	489.86	708.96	588.118	767.501	653.239	416.316	298.295	1291.57	2096.55	246.939	769.051	623.945	528.96	648.539	710.37	357.306
A0A0H2ZUQ2	772.993	611.615	744.821	725.002	743.513	687.785	756.529	725.956	796.153	772.309	815.203	716.932	751.659	766.503	815.874	775.936	775.546	1273.35	692.304	734.911	715.649	741.243	784.231	766.067	759.081	795.905	1024.45
A0A0H2ZUQ4	427.278	624.461	634.314	558.964	797.487	822.949	661.331	776.114	713.891	818.725	722.569	782.592	971.522	891.21	954.375	801.587	960.703	961.039	525.869	596.639	810.218	718.722	766.308	752.58	931.366	877.981	960.871
A0A0H2ZUQ5	569.776	517.842	598.823	553.359	670.571	645.695	660.507	636.645	753.374	719.079	658.169	678.235	1032.08	927.503	876.633	909.444	1023.72	1357.66	543.809	576.091	658.133	648.576	736.227	668.202	979.792	893.038	1190.69
A0A0H2ZUQ7	975.654	895.383	1790.48	2197.96	612.474	527.049	697.326	587.668	809.103	761.529	563.824	619.86	717.298	606.542	646.458	600.555	489.673	383.713	935.519	1994.22	569.761	642.497	785.316	591.842	661.92	623.506	436.693
A0A0H2ZUQ8	752.477	659.235	644.723	656.066	787.961	695.457	941.897	718.817	808.487	818.491	816.676	762.089	694.55	891.865	724.803	808.22	808.291	1016.26	705.856	650.395	741.709	830.357	813.489	789.383	793.208	766.512	912.274
A0A0H2ZUQ9	695.931	720.421	599.928	583.167	755.276	739.038	439.688	753.192	661.283	739.177	738.341	753.078	1023.47	948.104	845.582	1136.5	1063.5	521.264	708.176	591.548	747.157	596.44	700.23	745.71	985.79	991.042	792.379
A0A0H2ZUR0	864.331	838.382	836.091	910.611	815.107	787.047	733.798	748.151	784.649	784.938	713.939	783.588	771.095	670.471	741.322	674.86	765.999	949.392	851.357	873.351	801.077	740.975	784.793	748.764	720.783	708.091	857.696
A0A0H2ZUR1	474.552	749.248	534.292	454.266	186.668	406.861	352.103	995.558	455.457	1060.28	471.654	879.03	1424.7	786.677	2466.87	1162.39	416.844	455.621	611.9	494.279	296.765	673.831	757.868	675.342	1105.69	1814.63	436.232
A0A0H2ZUR3	650.335	707.444	694.963	732.902	735.42	856.316	682.55	785.322	752.319	799.738	723.649	792.703	968.614	669.011	953.52	678.913	758.849	1118.63	678.889	713.933	795.868	733.936	776.028	758.176	818.813	816.216	938.741
A0A0H2ZUR4	742.14	726.296	811.042	651.243	759.675	705.291	746.483	709.57	728.205	766.854	772.683	723.5	703.48	727.586	947.088	740.068	781.182	1334.69	734.218	731.143	732.483	728.026	747.53	748.091	715.533	843.578	1057.93
A0A0H2ZUR5	511.462	676.264	610.005	847.16	923.624	1136.34	740.166	1133.05	910.741	963.618	927.236	940.144	796.75	753.608	728.563	548.681	745.636	236.172	593.863	728.583	1029.98	936.61	937.18	933.69	775.179	638.622	490.904
A0A0H2ZUR7	466.547	590.994	657.693	555.489	817.323	766.342	944.385	828.768	977.969	961.663	922.779	951.719	648.146	772.59	712.857	752.741	782.784	917.534	528.77	606.591	791.832	886.576	969.816	937.249	710.368	732.799	850.159
A0A0H2ZUR8	571.375	792.588	795.571	859.59	623.927	842.644	617.542	900.416	646.023	621.673	649.732	801.428	962.273	830.635	1030.53	951.893	992.354	402.088	681.982	827.58	733.286	758.979	633.848	725.58	896.454	991.211	697.221
A0A0H2ZUR9	768.071	799.026	944.304	849.799	791.428	720.041	1088.41	901.763	945.673	987.125	734.761	722.167	622.753	650.334	616.496	602.388	608.532	966.974	783.548	897.051	755.735	995.086	966.399	728.464	636.543	609.442	787.753
A0A0H2ZUS0	1036.5	910.879	824.884	691.652	958.277	844.338	927.785	686.467	967.923	649.164	991.351	705.812	505.485	523.103	528.458	530.709	392.777	1674.48	973.689	758.268	901.307	807.126	808.544	848.581	514.294	529.584	1033.63
A0A0H2ZUS1	677.59	843.724	678.826	772.799	596.74	732.174	602.557	821.271	596.566	593.376	838.292	806.424	798.607	925.718	1009.63	1063.9	1057.66	369.287	760.657	725.812	664.457	711.914	594.971	822.358	862.163	1036.76	713.473
A0A0H2ZUS2	1482.33	1390.68	915.33	1040.42	256.033	479.438	456.192	685.655	436.373	642.358	404.075	636.457	1316.47	1003	993.811	742.598	779.972	435.884	1436.51	977.873	367.735	570.923	539.366	520.266	1159.73	868.205	607.928
A0A0H2ZUS3	726.131	673.517	669.297	766.894	885.943	817.279	891.311	951.151	999.855	1077.5	977.421	1001.87	583.504	662.047	635.961	583.208	626.363	686.715	699.824	718.096	851.611	921.231	1038.68	989.646	622.776	609.585	656.539
A0A0H2ZUS5	1181.43	1069.06	1335.41	1198.3	782.484	820.167	660.217	733.246	740.442	854.201	571.234	853.853	643.737	649.654	731.097	493.648	591.585	582.547	1125.25	1266.86	801.326	696.731	797.322	712.544	646.696	612.373	587.066
A0A0H2ZUS6	1688.44	476.62	236.456	377.888	408.356	275.421	616.686	416.229	1013.37	315.018	1117.64	328.373	682.378	648.734	700.754	2678.4	499.602	734.014	1082.53	307.172	341.889	516.457	664.192	723.009	665.556	1689.58	616.808
A0A0H2ZUS7	650.642	634.751	480.557	424.978	651.569	470.07	737.682	567.525	534.338	463.863	664.111	384.232	1021.08	1249.66	1056.57	1797.08	1039.97	512.626	642.697	452.767	560.819	652.604	499.1	524.172	1135.37	1426.82	776.297
A0A0H2ZUS8	3116.62	566.591	3064.2	653.502	284.084	404.1	300.962	383.895	231.419	470.258	207.654	509.226	283.094	373.202	247.82	395.184	259.508	3435.74	1841.6	1858.85	344.092	342.428	350.839	358.44	328.148	321.502	1847.63
A0A0H2ZUS9	860.71	814.521	1015.54	949.624	747.629	690.252	771.158	744.188	787.329	757.374	812.775	723.109	670.039	822.813	750.576	743.702	659.771	831.173	837.615	982.582	718.94	757.673	772.351	767.942	746.426	747.139	745.472
A0A0H2ZUT0	871.965	827.703	707.104	584.883	809.675	756.291	686.272	794.367	824.487	756.527	802.149	754.006	739.077	789.026	754.876	900.406	783.419	866.222	849.834	645.993	782.983	740.32	790.507	778.077	764.052	827.641	824.821
A0A0H2ZUT1	886.511	961.338	795.186	778.537	798.026	807.823	879.98	869.643	866.16	934.664	825.648	877.272	669.73	614.322	675.936	564.828	653.714	828.149	923.924	786.861	802.924	874.811	900.412	851.46	642.026	620.382	740.932
A0A0H2ZUT2	737.536	869.225	1236.56	1278.92	517.726	319.294	718.531	698.713	827.406	691.652	617.521	628.031	935.611	1056.72	889.68	829.225	603.321	595.695	803.38	1257.74	418.51	708.622	759.529	622.776	996.166	859.453	599.508
A0A0H2ZUT3	841.319	968.705	719.366	821.769	812.395	879.177	682.509	927.916	740.256	590.601	843.945	717.24	805.404	790.172	748.927	806.077	769.624	576.403	905.012	770.567	845.786	805.212	665.428	780.593	797.788	777.502	673.014
A0A0H2ZUT4	865.378	658.103	913.325	781.663	902.149	778.12	985.084	762.658	899.786	760.254	848.936	730.4	583.331	713.704	600.681	669.965	523.88	1263.46	761.741	847.494	840.134	873.871	830.02	789.668	648.517	635.323	893.669
A0A0H2ZUT6	740.903	777.534	706.667	739.341	731.314	810.761	777.168	898.607	841.889	847.448	916.778	842.942	721.505	821.03	763.407	856.592	751.939	466.247	759.219	723.004	771.038	837.887	844.669	879.86	771.267	809.999	609.093
A0A0H2ZUT8	537.024	459.358	513.005	560.988	640.193	624.558	622.671	622.002	689.894	635.175	680.269	725.501	976.988	765.782	1059.69	758.506	1084.18	1867.97	498.191	536.997	632.376	622.336	662.534	702.885	871.385	909.099	1476.08
A0A0H2ZUT9	443.56	538.262	567.01	593.343	1014.11	896.928	766.23	732.099	849.285	804.148	757.473	864.215	805.744	858.568	797.13	764.061	889.582	1003.09	490.911	580.177	955.52	749.165	826.717	810.844	832.156	780.595	946.336
A0A0H2ZUU0	1798.16	1366.94	951.014	1044.32	729.854	844.665	526.773	526.801	663.612	459.941	694.364	462.579	620.092	757.72	708.855	705.907	530.74	941.058	1582.55	997.668	787.26	526.787	561.777	578.472	688.906	707.381	735.899
A0A0H2ZUU4	1836.03	1200.43	1833.6	1402.7	547.781	592.691	793.718	625.468	622.689	449.349	577.517	494.252	455.278	785.72	456.217	917.969	384.43	537.778	1518.23	1618.15	570.236	709.593	536.019	535.885	620.499	687.093	461.104
A0A0H2ZUU7	630.685	599.443	703.171	638.332	989.511	932.337	876.208	764.913	795.188	859.258	781.577	849.924	689.104	843.152	738.775	779.138	785.324	802.273	615.064	670.751	960.924	820.56	827.223	815.75	766.128	758.956	793.799
A0A0H2ZUU8	767.504	737.739	781.34	760.955	819.355	819.836	883.019	858.896	919.8	879.631	886.637	864.18	652.436	724.334	654.147	712.29	658.012	775.387	752.622	771.148	819.595	870.958	899.715	875.408	688.385	683.218	716.7
A0A0H2ZUU9	490.816	675.036	474.082	701.171	866.449	1099.24	471.22	802.269	562.65	584.059	762.912	758.827	976.043	874.097	1011.78	978.036	1147.38	504.896	582.926	587.626	982.844	636.745	573.354	760.87	925.07	994.907	826.14
A0A0H2ZUV0	440.001	580.873	614.93	619.496	932.812	798.795	818.738	791.43	790.238	888.195	831.736	859.219	795.34	937.655	856.563	935.592	818.905	573.828	510.437	617.213	865.803	805.084	839.216	845.478	866.498	896.077	696.367
A0A0H2ZUV4	1572.57	1740.02	1524.87	1344.69	458.105	496.245	778.104	581.471	684.075	815.066	761.858	715.469	438.624	467.372	608.824	513.211	511.933	631.643	1656.29	1434.78	477.175	679.787	749.571	738.664	452.998	561.018	571.788
A0A0H2ZUV5	1164.39	1002.57	838.013	507.739	784.198	797.282	966.828	924.875	944.13	1130.22	976.015	1021.1	473.355	579.051	509.031	531.835	485.671	788.861	1083.48	672.876	790.74	945.852	1037.17	998.557	526.203	520.433	637.266
A0A0H2ZUV6	724.433	941.352	928.171	874.543	600.558	441.455	417.846	711.123	550.92	515.407	705.738	548.904	987.444	1158.1	970.253	1233.63	1013.39	359.196	832.892	901.357	521.006	564.484	533.164	627.321	1072.77	1101.94	686.293
A0A0H2ZUV7	545.007	676.525	655.044	930.933	799.917	946.34	540.501	585.405	589.396	603.047	559.439	758.452	1036.89	693.981	993.448	846.369	1125.63	1004.64	610.766	792.988	873.128	562.953	596.221	658.945	865.437	919.909	1065.14
A0A0H2ZUV8	684.331	950.047	513.889	836.369	719.337	584.978	712.046	490.847	683.946	432.048	811.194	421.321	865.284	1123.76	934.313	1228.09	937.446	708.614	817.189	675.129	652.157	601.446	557.997	616.258	994.522	1081.2	823.03
A0A0H2ZUW2	2504.39	2871.53	1700.47	1429.46	433.874	460.692	546.113	536.393	484.71	483.527	544.886	465.643	427.786	368.62	479.319	349.15	424.52	470.71	2687.96	1564.97	447.283	541.253	484.118	505.265	398.203	414.234	447.615
A0A0H2ZUW5	1290.03	921.242	968.718	1103.59	790.711	799.676	528.465	743.891	682.223	634.997	688.39	756.665	703.349	625.716	675.18	789.913	778.211	732.6	1105.64	1036.15	795.194	636.178	658.61	722.528	664.533	732.547	755.405
A0A0H2ZUW6	1210.27	1119.58	929.302	1267.72	723.029	746.743	653.537	690.312	645.789	637.748	628.485	720.726	752.245	671.966	786.476	655.82	770.397	649.41	1164.92	1098.51	734.886	671.925	641.769	674.605	712.105	721.148	709.903
A0A0H2ZUW7	1895.81	1333.21	1638.73	1561.42	502.264	485.139	564.751	579.041	558.279	801.486	518.543	695.576	496.434	650.502	615.78	612.169	617.431	477.532	1614.51	1600.08	493.702	571.896	679.883	607.059	573.468	613.975	547.482
A0A0H2ZUW8	429.375	746.461	647.69	726.945	724.818	934.688	710.829	964.837	785.672	874.178	772.146	908.283	948.598	842.332	993.909	787.719	845.349	310.914	587.918	687.317	829.753	837.833	829.925	840.214	895.465	890.814	578.131
A0A0H2ZUX1	518.758	828.879	868.706	918.005	954.158	931.065	816.26	756.198	755.207	784.904	784.664	871.125	733.432	596.385	804.65	580.68	757.525	943.033	673.819	893.355	942.612	786.229	770.056	827.895	664.908	692.665	850.279
A0A0H2ZUX2	1400.74	1509.85	1378.64	1181.87	481.65	434.255	762.794	815.496	854.099	907.984	728.58	934.565	594.683	439.213	577.315	424.923	490.459	700.088	1455.29	1280.25	457.953	789.145	881.041	831.572	516.948	501.119	595.274
A0A0H2ZUX4	1350	864.754	757.788	864.903	525.782	444.591	873.667	761.956	945.307	663.24	970.606	700.297	643.302	1097.99	458.151	943.194	565.3	579.935	1107.38	811.346	485.186	817.812	804.273	835.451	870.647	700.672	572.617
A0A0H2ZUX5	959.931	758.351	840.83	773.788	808.222	789.943	832.2	747.526	798.816	822.798	751.548	824.567	782.665	641.267	700.88	695.593	598.263	1088.34	859.141	807.309	799.082	789.863	810.807	788.057	711.966	698.236	843.303
A0A0H2ZUX7	493.835	707.962	583.179	474.396	804.569	737.899	740.405	836.153	817.413	793.406	814.465	797.833	862.906	787.019	861.676	757.244	886.135	1185.13	600.899	528.788	771.234	788.279	805.41	806.149	824.963	809.46	1035.63
A0A0H2ZUX8	560.484	649.445	828.133	835.393	898.328	862.043	691.816	781.021	663.237	828.332	616.506	852.902	898.556	744.033	873.507	725.486	922.111	831.303	604.964	831.763	880.186	736.418	745.784	734.704	821.295	799.497	876.707
A0A0H2ZUY0	1395.91	1583.47	1514.76	1375.75	497.357	636.307	600.557	716.708	600.118	550.356	568.5	665.574	689.871	554.052	715.317	636.324	680.032	497.893	1489.69	1445.25	566.832	658.632	575.237	617.037	621.962	675.821	588.963
A0A0H2ZUY1	861.157	706.919	840.921	704.095	699.193	649.034	792.724	701.929	743.61	738.447	745.545	697.304	783.199	771.162	796.265	763.819	757.062	1325.37	784.038	772.508	674.114	747.326	741.028	721.424	777.181	780.042	1041.22
A0A0H2ZUY2	696.24	750.316	830.191	861.234	923.54	975.607	830.734	787.108	802.891	842.992	713.216	839.086	694.044	751.218	755.546	692.922	780.738	638.719	723.278	845.712	949.574	808.921	822.941	776.151	722.631	724.234	709.729
A0A0H2ZUY3	333.061	429.941	472.53	479.612	846.328	730.913	967.078	1145.6	986.556	1204.62	1111.15	1270.24	701.391	712.461	723.029	595.857	706.437	637.88	381.501	476.071	788.621	1056.34	1095.59	1190.7	706.926	659.443	672.159
A0A0H2ZUY4	729.898	671.977	821.99	757.184	898.025	817.554	680.27	610.779	577.484	728.843	690.15	641.466	810.363	780.039	927.11	901.719	850.331	1097.17	700.938	789.587	857.79	645.525	653.163	665.808	795.201	914.415	973.752
A0A0H2ZUY6	732.199	511.167	756.883	695.184	587.852	466.786	645.603	491.044	619.301	541.807	563.322	487.658	1032.07	757.344	1002.61	786.19	976.792	2244.25	621.683	726.034	527.319	568.324	580.554	525.49	894.705	894.402	1610.52
A0A0H2ZUY7	821.433	1043.72	817.587	770.214	641.251	712.149	576.027	665.488	610.266	606.357	647.512	624.447	899.677	841.05	955.105	866.718	973.247	890.824	932.578	793.9	676.7	620.757	608.311	635.98	870.364	910.912	932.036
A0A0H2ZUY8	907.891	763.216	760.755	729.412	858.374	922.11	880.099	727.873	964.125	784.459	815.049	774.015	595.379	779.515	647.269	733.414	636.298	887.092	835.554	745.084	890.242	803.986	874.292	794.532	687.447	690.342	761.695
A0A0H2ZUY9	703.316	711.09	791.823	752.03	948.064	956.476	802.153	760.282	763.48	842.345	764.704	794.01	743.086	848.022	721.929	735.252	767.442	693.935	707.203	771.926	952.27	781.218	802.912	779.357	795.554	728.59	730.689
A0A0H2ZUZ0	475.647	618.273	674.276	730.922	804.087	941.299	749.657	749.922	776.292	850.304	762.685	842.13	819.476	785.088	870.937	751.025	953.537	824.114	546.96	702.599	872.693	749.79	813.298	802.408	802.282	810.981	888.826
A0A0H2ZUZ1	853.165	955.182	743.371	1665.49	806.16	479.98	608.28	795.209	801.387	584.253	661.696	309.98	852.916	685.575	702.849	999.362	931.515	518.536	904.174	1204.43	643.07	701.744	692.82	485.838	769.245	851.106	725.026
A0A0H2ZUZ2	1035.75	952.529	1036.11	1016.19	680.064	803.075	680.687	908.806	809.289	892.991	830.533	870.029	664.919	649.548	665.031	625.891	683.267	488.465	994.138	1026.15	741.569	794.747	851.14	850.281	657.233	645.461	585.866
A0A0H2ZUZ3	1594.45	744.122	764.231	998.391	419.306	481.094	535.534	668.913	512.265	510.291	696.738	531.66	904.099	747.546	964.521	959.452	675.971	1313.9	1169.29	881.311	450.2	602.223	511.278	614.199	825.823	961.987	994.937
A0A0H2ZUZ4	670.066	743.215	669.383	815.993	822.859	656.491	543.205	601.386	639.488	451.786	626.132	571.913	1001.52	815.625	799.6	1078.29	1098.34	1161.98	706.641	742.688	739.675	572.296	545.637	599.022	908.574	938.943	1130.16
A0A0H2ZUZ6	467.042	659.914	533.728	560.405	734.177	654.891	939.905	861.508	918.553	928.404	846.123	929.527	817.208	889.159	832.182	747.303	796.286	840.102	563.478	547.067	694.534	900.706	923.478	887.825	853.184	789.743	818.194
A0A0H2ZUZ7	1481.69	1212	1020.53	1040.02	855.857	788.829	855.302	853.685	855.337	874.629	756.226	803.923	500.748	473.21	488.127	536.809	448.105	708.574	1346.84	1030.28	822.343	854.493	864.983	780.074	486.979	512.468	578.339
A0A0H2ZUZ8	774.31	410.761	628.298	466.558	722.076	428.577	781.212	442.507	917.87	516.37	885.474	484.714	766.663	782.289	733.624	1434	733.013	1750.39	592.536	547.428	575.327	611.86	717.12	685.094	774.476	1083.81	1241.7
A0A0H2ZUZ9	965.226	1438.19	1005.75	1423.84	376.707	638.394	262.048	496.273	283.806	338.793	464.224	505.322	1046.14	791.115	1058.1	936.409	1425.19	433.934	1201.71	1214.8	507.55	379.161	311.299	484.773	918.629	997.256	929.562
A0A0H2ZV04	855.037	595.321	973.48	730.887	762.802	744.342	923.7	682.453	771.406	791.154	676.782	713.214	671.153	706.925	786.475	714.831	685.411	1413.19	725.179	852.184	753.572	803.077	781.28	694.998	689.039	750.653	1049.3
A0A0H2ZV05	932.157	910.319	686.84	704.285	866.788	964.838	749.138	787.129	737.664	537.754	941.068	699.903	665.499	721.037	723.642	1097.82	694.477	545.625	921.238	695.562	915.813	768.134	637.709	820.486	693.268	910.729	620.051
A0A0H2ZV06	693.548	669.982	608.599	704.128	780.484	868.564	734.188	876.923	817.621	909.869	857.776	918.21	796.185	818.683	807.106	783.657	816.014	539.777	681.765	656.363	824.524	805.555	863.745	887.993	807.434	795.381	677.896
A0A0H2ZV07	1013.37	859.253	663.201	785.273	864.178	777.239	759.527	926.718	826.565	769.51	1037.33	895.577	663.854	779.399	584.223	719.577	594.751	607.362	936.314	724.237	820.708	843.123	798.038	966.454	721.626	651.9	601.056
A0A0H2ZV08	678.466	609.656	727.988	651.877	905.231	780.151	823.312	746.573	872.027	851.226	769.226	838.714	748.935	756.269	719.268	740.089	744.794	1114.86	644.061	689.933	842.691	784.943	861.626	803.97	752.602	729.679	929.829
A0A0H2ZV09	1977.39	1683.68	2380.72	2223.2	204.864	325.097	538.904	666.906	640.362	759.175	497.307	820.936	535.631	315.789	520.302	312.198	304.164	305.363	1830.53	2301.96	264.98	602.905	699.769	659.121	425.71	416.25	304.763
A0A0H2ZV10	1683.21	1147	483.715	974.229	660.79	838.321	601.649	852.556	915.519	779.331	791.463	785.983	656.266	690.023	721.461	726.14	567.82	368.295	1415.1	728.972	749.556	727.102	847.425	788.723	673.145	723.8	468.058
A0A0H2ZV12	458.273	599.984	557.275	570.665	614.453	682.078	529.466	708.547	512.807	668.939	564.929	670.445	861.623	882.013	1020.81	829.719	1621.75	1380.76	529.129	563.97	648.266	619.007	590.873	617.687	871.818	925.262	1501.26
A0A0H2ZV13	827.144	703.775	697.991	695.137	868.577	779.265	836.452	716.384	871.492	758.334	859.962	763.901	699.898	723.762	673.172	788.132	673.036	1144.26	765.46	696.564	823.921	776.418	814.913	811.931	711.83	730.652	908.649
A0A0H2ZV14	823.198	1005.36	788.184	787.065	1031.94	985.178	736.761	829.935	826.514	880.399	773.584	804.863	603.864	630.022	667.869	655.106	783.954	627.875	914.278	787.624	1008.56	783.348	853.457	789.223	616.943	661.487	705.915
A0A0H2ZV15	496.509	741.367	653.46	711.741	707.163	1121.16	604.044	864.047	706.105	872.007	458.578	828.831	1179.92	661.39	1098.04	671.746	956.895	708.283	618.938	682.6	914.162	734.046	789.056	643.705	920.654	884.893	832.589
A0A0H2ZV18	1247	1405.14	695.464	974.872	762.236	731.982	468.412	644.697	633.387	419.467	710.949	488.185	824.434	787.507	721.634	1021.63	924.729	511.823	1326.07	835.168	747.109	556.554	526.427	599.567	805.97	871.632	718.276
A0A0H2ZV20	401.982	760.831	724.258	758.597	1439.98	993.895	675.767	831.598	700.074	755.547	690.525	716.285	717.961	985.994	705.34	854.785	904.486	362.555	581.406	741.427	1216.94	753.682	727.81	703.405	851.977	780.063	633.52
A0A0H2ZV21	586.125	738.054	692.134	705.225	781.831	812.543	770.4	800.952	760.613	759.775	704.254	787.148	868.025	972.819	843.426	794.426	912.824	659.007	662.09	698.679	797.187	785.676	760.194	745.701	920.422	818.926	785.915
A0A0H2ZV22	344.411	795.21	489.671	772.272	377.339	683.661	292.8	743.045	389.176	481.849	451.723	582.782	1449.02	1195.2	1340.26	1161.78	1485.22	388.571	569.81	630.972	530.5	517.923	435.513	517.252	1322.11	1251.02	936.897
A0A0H2ZV23	1033.16	1085.67	989.923	827.495	819.479	830.462	660.277	854.703	728.753	835.614	787.89	980.086	682.775	605.761	705.719	621.222	680.619	580.842	1059.42	908.709	824.97	757.49	782.183	883.988	644.268	663.47	630.731
A0A0H2ZV24	1376.74	795.625	1388.32	1911.71	708.504	669.078	356.9	456.313	427.648	509.6	440.54	436.243	759.15	695.614	825.124	682.576	910.32	929.117	1086.18	1650.01	688.791	406.607	468.624	438.392	727.382	753.85	919.719
A0A0H2ZV25	757.007	711.053	809.277	754.419	823.585	781.954	786.319	713.47	779.39	750.256	773.263	764.597	754.195	719.041	731.751	749.829	785.814	1144.25	734.03	781.848	802.769	749.895	764.823	768.93	736.618	740.79	965.032
A0A0H2ZV26	512.427	574.653	650.888	695.664	1049.04	705.459	1151.78	810.364	931.808	874.048	920.351	794.944	612.389	797.991	623.71	694.533	568.937	1147.6	543.54	673.276	877.25	981.071	902.928	857.647	705.19	659.122	858.267
A0A0H2ZV28	2131.92	1787.21	3019.99	2659.23	277.133	299.46	912.325	679.017	592.85	683.621	192.651	218.434	256.479	313.621	279.817	257.072	252.948	525.09	1959.56	2839.61	288.296	795.671	638.236	205.542	285.05	268.444	389.019
A0A0H2ZV30	650.369	823.464	659.029	738.356	824.623	661.651	570.429	757.406	746.552	820.198	709.37	816.39	869.739	909.197	878.657	976.363	978.599	475.373	736.916	698.693	743.137	663.917	783.375	762.88	889.468	927.51	726.986
A0A0H2ZV31	645.016	555.27	748.404	590.662	746.769	792.656	807.589	960.164	842.663	1050.85	694.663	1034.46	903.592	659.838	809.114	704.382	764.982	811.245	600.143	669.533	769.713	883.877	946.757	864.562	781.715	756.748	788.114
A0A0H2ZV32	902.758	696.678	739.884	608.497	787.537	549.049	865.474	557.365	772.07	666.779	713.268	640.863	787.498	498.925	676.744	764.568	779.699	2103.86	799.718	674.19	668.293	711.419	719.424	677.065	643.212	720.656	1441.78
A0A0H2ZV33	606.175	709.33	639.262	666.927	682.696	818.367	651.393	840.626	700.159	755.905	794.283	816.949	898.873	958.594	969.871	881.861	922.489	552.427	657.753	653.094	750.532	746.01	728.032	805.616	928.734	925.866	737.458
A0A0H2ZV34	315.672	639.344	493.494	621.931	577.897	788.983	646.568	876.459	750.118	841.517	716.35	847.589	1143.88	963.907	1145.77	747.234	962.549	726.265	477.508	557.712	683.44	761.514	795.818	781.97	1053.9	946.503	844.407
A0A0H2ZV35	1345.47	1124.39	593.855	656.23	664.597	453.798	587.974	493.196	727.805	401.107	814.189	416.202	739.463	1227.29	679.426	1465.11	843.58	428.747	1234.93	625.042	559.198	540.585	564.456	615.195	983.377	1072.27	636.163
A0A0H2ZV36	2761.56	2158.52	1283	2507.8	347.09	281.611	279.253	468.392	421.329	417.68	592.19	395.461	675.722	435.92	592.459	420.488	456.687	241.126	2460.04	1895.4	314.351	373.822	419.504	493.826	555.821	506.474	348.907
A0A0H2ZV37	933.135	957.194	795.541	725.355	838.976	865.518	850.863	852.561	844.425	876.056	893.544	858.805	626.373	710.183	628.057	685.806	643.105	634.996	945.165	760.448	852.247	851.712	860.24	876.175	668.278	656.931	639.051
A0A0H2ZV40	629.266	384.185	633.963	514.262	723.699	651.873	839.712	656.29	812.234	766.562	673.148	754.199	876.258	718.925	872.028	753.26	868.77	1844.31	506.726	574.113	687.786	748.001	789.398	713.674	797.591	812.644	1356.54
A0A0H2ZV41	1132.39	1166.17	882.187	807.877	890.076	783.965	881.488	778.62	922.085	613.675	865.435	725.49	534.504	647.908	532.382	781.222	509.317	815.473	1149.28	845.032	837.021	830.054	767.88	795.462	591.206	656.802	662.395
A0A0H2ZV42	1280.76	1751.33	2083.87	1908.23	395.305	411.786	752.592	809.51	647.478	681.161	534.627	597.782	606.73	401.244	642.358	394.682	481.581	408.467	1516.05	1996.05	403.545	781.051	664.32	566.204	503.987	518.52	445.024
A0A0H2ZV44	601.566	533.136	702.723	947.282	733.287	617.734	868.42	612.581	784.213	673.344	763.471	687.997	846.931	602.549	890.813	720.238	757.431	1688.76	567.351	825.002	675.51	740.5	728.778	725.734	724.74	805.525	1223.1
A0A0H2ZV45	574.633	661.498	1429	761.228	791.66	761.423	896.423	704.53	653.198	1179.16	664.852	1010.47	593.374	682.791	782.508	453.961	771.409	1038.99	618.066	1095.11	776.541	800.477	916.18	837.662	638.082	618.234	905.202
A0A0H2ZV46	3498.43	2596.06	1752.53	924.395	278.104	207.677	532.027	298.924	436.247	299.889	385.61	257.138	329.863	730.031	335.944	1315.12	224.71	282.407	3047.24	1338.46	242.891	415.475	368.068	321.374	529.947	825.53	253.559
A0A0H2ZV48	1029.48	824.994	877.426	942.119	805.348	711.975	683.309	679.317	723.486	575.591	771.521	633.073	782.112	752.319	679.801	1099.17	701.288	717.486	927.237	909.773	758.661	681.313	649.539	702.297	767.215	889.483	709.387
A0A0H2ZV52	649.669	767.45	754.137	711.304	818.146	895.22	743.835	800.282	791.792	726.432	750.738	794.021	820.509	784.881	822.366	801.186	805.307	791.177	708.56	732.72	856.683	772.058	759.112	772.379	802.695	811.776	798.242
A0A0H2ZV53	607.222	426.386	697.447	483.499	839.187	846.588	913.454	855.121	828.669	990.515	820.015	971.46	816.847	882.877	720.549	826.95	721.741	759.585	516.804	590.473	842.888	884.287	909.592	895.737	849.862	773.75	740.663
A0A0H2ZV54	889.275	848.405	937.062	764.38	824.917	808.381	838.147	794.205	815.287	836.188	828.291	790.421	541.118	651.949	688.747	734.239	720.836	909.877	868.84	850.721	816.649	816.176	825.737	809.356	596.534	711.493	815.357
A0A0H2ZV58	1218.59	1204.09	994.247	741.604	674.304	664.22	847.209	869.782	927.865	990.639	844.053	918.866	558.271	609.736	529.007	581.278	564.927	668.78	1211.34	867.926	669.262	858.496	959.252	881.46	584.004	555.143	616.854
A0A0H2ZV60	651.728	462.129	428.507	459.568	968.066	606.533	1072.39	561.21	1086.13	559.001	1025.57	587.039	597.078	761.151	548.267	1001.35	583.391	1914.16	556.928	444.038	787.3	816.8	822.563	806.306	679.114	774.807	1248.77
A0A0H2ZV62	606.422	532.72	655.153	556.163	919.269	834.994	869.914	734.98	767.288	781.02	809.267	729.688	764.94	771.618	801.077	769.321	763.907	1348.73	569.571	605.658	877.131	802.447	774.154	769.478	768.279	785.199	1056.32
A0A0H2ZV63	665.953	660.386	662.75	679.919	837.278	787.387	740.835	772.23	816.67	788.054	794.227	744.761	865.522	847.864	771.504	854.237	777.738	890.53	663.17	671.335	812.333	756.532	802.362	769.494	856.693	812.871	834.134
A0A0H2ZV65	1394.51	1230.98	1426.84	1755.87	664.658	562.971	709.884	645.354	723.006	690.378	626.419	591.759	607.173	510.293	602.875	508.838	538.782	756.282	1312.74	1591.36	613.815	677.619	706.692	609.089	558.733	555.856	647.532
A0A0H2ZV66	567.75	607.642	638.679	641.645	800.76	847.865	730.121	855.02	843.379	874.147	883.3	1007.18	768.383	811.38	805.483	791.554	854.345	641.288	587.696	640.162	824.312	792.57	858.763	945.24	789.881	798.519	747.816
A0A0H2ZV72	732.732	1120.12	697.126	569.981	596.144	565.493	641.627	946.105	694.081	650.11	698.854	733.556	980.698	787.956	924.536	871.616	929.599	804.053	926.426	633.554	580.819	793.866	672.095	716.205	884.327	898.076	866.826
A0A0H2ZV73	704.8	748.549	735.415	843.646	870.738	798.278	836.559	801.77	827.365	788.305	790.794	782.541	726.288	797.245	736.465	804.368	762.268	704.005	726.674	789.53	834.508	819.165	807.835	786.667	761.766	770.416	733.136
A0A0H2ZV74	791.866	771.072	778.504	715.823	775.957	704.008	900.006	805.412	908.265	845.627	903.937	846.59	630.478	687.318	672.452	665.462	661.982	1103.14	781.469	747.164	739.983	852.709	876.946	875.263	658.898	668.957	882.559
A0A0H2ZV76	553.079	477.276	513.308	490.594	790.033	668.072	869.229	744.173	897.08	728.761	889.192	674.575	812.936	1009.86	823.569	984.361	742.373	1127.68	515.178	501.951	729.053	806.701	812.921	781.883	911.4	903.965	935.025
A0A0H2ZV79	642.61	831.449	725.281	695.061	857.204	893.639	844.321	847.886	856.275	840.08	897.143	810.309	693.91	753.051	750.535	777.399	705.426	659.766	737.029	710.171	875.422	846.104	848.178	853.726	723.481	763.967	682.596
A0A0H2ZV82	1544.49	1108.71	1419.88	888.199	681.006	761.621	687.486	927.822	723.581	741.799	780.678	824.785	503.19	662.237	539.145	706.286	438.24	545.122	1326.6	1154.04	721.313	807.654	732.69	802.732	582.714	622.715	491.681
A0A0H2ZV84	454.223	843.564	413.451	835.913	554.754	695.205	435.635	831.827	502.289	427.713	754.82	631.203	1120.64	1120.1	1290.5	1162.9	1165.4	278.563	648.893	624.682	624.979	633.731	465.001	693.012	1120.37	1226.7	721.984
A0A0H2ZV85	1204.98	1579.04	770.875	850.389	968.623	1069.16	425.688	642.942	483.603	493.735	626.577	468.119	840.831	845.562	819.023	632.842	885.097	578.517	1392.01	810.632	1018.89	534.315	488.669	547.348	843.197	725.933	731.807
A0A0H2ZV86	488.744	481.333	971.282	1280.15	492.399	616.047	561.382	608.213	525.291	707.973	577.451	549.729	1074.62	974.854	1070.43	830.486	1114.26	916.786	485.038	1125.72	554.223	584.797	616.632	563.59	1024.74	950.46	1015.52
A0A0H2ZV87	567.661	659.9	648.545	694.716	793.443	831.98	770.668	812.097	726.026	804.173	781.134	800.242	838.253	870.177	890.338	829.46	886.29	736.391	613.781	671.631	812.711	791.382	765.1	790.688	854.215	859.899	811.34
A0A0H2ZV88	983.932	684.642	853.413	699.752	790.032	664.844	793.547	619.996	754.642	627.456	747.327	618.054	706.441	701.603	706.383	798.613	728.397	1624.19	834.287	776.582	727.438	706.772	691.049	682.69	704.022	752.498	1176.3
A0A0H2ZV89	454.564	582.443	623.647	605.888	709.46	946.941	729.593	987.134	837.276	667.074	637.082	842.77	948.668	595.705	1009.18	692.033	920.304	1224.64	518.503	614.768	828.2	858.363	752.175	739.926	772.186	850.605	1072.47
A0A0H2ZV91	1137.64	1519.21	906.878	895.129	753.436	939.449	597.834	600.768	597.234	530.643	638.778	560.04	787.687	786.431	758.538	695.618	878.335	612.936	1328.42	901.003	846.442	599.301	563.938	599.409	787.059	727.078	745.636
A0A0H2ZV92	1131.35	1039.41	840.055	981.36	603.054	710.515	481.1	806.608	632.752	614.464	853.36	707.995	812.663	841.49	768.145	812.463	854.603	542.249	1085.38	910.707	656.784	643.854	623.608	780.677	827.077	790.304	698.426
A0A0H2ZV93	1002.67	496.861	509.621	635.271	798.119	830	923.936	809.273	776.155	1042.99	861.918	847.412	673.099	809.535	734.304	695.015	717.931	947.51	749.765	572.446	814.06	866.604	909.572	854.665	741.317	714.66	832.72
A0A0H2ZV95	600.281	722.739	975.829	801.161	795.393	780.819	864.109	805.598	771.318	883.739	731.428	803.102	720.731	636.607	815.857	669.941	758.667	1055.53	661.51	888.495	788.106	834.853	827.529	767.265	678.669	742.899	907.098
A0A0H2ZV96	601.41	328.929	617.704	424.73	443.765	432.897	1014.66	915.336	1093.92	1011.5	1133.54	1037.86	911.056	1087.49	569.775	1077.42	511.836	561.013	465.17	521.217	438.331	964.998	1052.71	1085.7	999.274	823.596	536.424
A0A0H2ZV97	767.339	668.055	867.561	748.522	615.955	582.354	815.91	696.794	751.069	760.767	735.829	728.357	830.935	806.647	838.523	787.151	776.076	1259.18	717.697	808.041	599.154	756.352	755.918	732.093	818.791	812.837	1017.63
A0A0H2ZV98	2731.95	2507.95	3067.43	2776.24	251.479	228.203	395.552	395.811	419.562	478.435	267.312	349.899	276.072	204.318	335.539	188.254	197.633	364.007	2619.95	2921.84	239.841	395.682	448.998	308.606	240.195	261.897	280.82
A0A0H2ZVA0	602.499	554.796	758.427	660.409	839.695	870.726	921.417	810.96	795.697	1057.27	721.682	909.174	809.784	823.496	837.726	773.432	709.258	633.595	578.647	709.418	855.21	866.188	926.484	815.428	816.64	805.579	671.426
A0A0H2ZVA1	1506.93	2678.12	1321.92	1214.92	892.666	335.011	755.643	658.474	748.764	782.164	847.348	668.357	351.306	583.421	437.589	440.444	460.297	13.5071	2092.52	1268.42	613.838	707.059	765.464	757.852	467.363	439.017	236.902
A0A0H2ZVA4	757.85	943.977	641.705	765.988	574.649	707.229	554.205	734.517	605.502	567.85	824.831	548.402	899.793	806.753	983.999	1161.45	1007.93	672.407	850.913	703.847	640.939	644.361	586.676	686.616	853.273	1072.73	840.17
A0A0H2ZVA5	651.373	784.167	524.064	707.044	717.898	914.633	627.83	1032.63	700.621	742.141	891.486	874.488	902.737	723.816	882.854	724.347	931.574	631.549	717.77	615.554	816.265	830.232	721.381	882.987	813.276	803.6	781.561
A0A0H2ZVA7	854.948	1005.72	1086.86	968.662	839.257	741.242	578.053	687.771	660.361	528.126	720.265	628.225	763.032	760.556	662.724	792.465	878.675	947.699	930.336	1027.76	790.25	632.912	594.243	674.245	761.794	727.595	913.187
A0A0H2ZVA8	495.521	414.923	945.979	815.15	368.597	886.226	544.68	935.584	581.26	1017.01	569.271	1027.9	1107.31	686.731	1133.63	538.511	1109.93	885.967	455.222	880.564	627.411	740.132	799.136	798.585	897.018	836.073	997.949
A0A0H2ZVA9	452.748	707.262	651.251	717.842	1030.18	1004	831.2	845.226	850.195	906.528	875.604	886.101	744.307	757.345	727.078	742.44	764.65	560.804	580.005	684.547	1017.09	838.213	878.362	880.852	750.826	734.759	662.727
A0A0H2ZVB0	607.107	890.92	530.589	392.135	673.367	430.67	473.828	461.905	640.811	267.614	636.041	354.507	1187.17	1094.13	953.566	1993.1	1082.25	569.616	749.014	461.362	552.019	467.867	454.213	495.274	1140.65	1473.33	825.934
A0A0H2ZVB1	547.014	673.992	650.839	700.748	915.13	929.645	760.408	783.823	678.468	760.799	705.479	791.903	917.755	865.228	870.363	832.604	868.369	701.627	610.503	675.793	922.387	772.116	719.634	748.691	891.492	851.484	784.998
A0A0H2ZVB2	1260.6	1102.85	1077.37	860.645	816.035	800.129	855.957	795.824	832.102	878.137	804.215	885.155	532.215	618.147	517.571	610.479	517.01	669.926	1181.73	969.009	808.082	825.89	855.12	844.685	575.181	564.025	593.468
A0A0H2ZVB5	762.878	1033.69	361.687	580.044	535.54	682.522	502.103	890.022	633.432	374.435	912.228	560.375	1088.11	1052.58	1045.11	1298.98	914.594	325.045	898.282	470.865	609.031	696.062	503.933	736.302	1070.34	1172.04	619.819
A0A0H2ZVB7	1093.32	737.714	605.463	795.028	824.059	877.986	654.852	809.013	606.857	791.511	693.239	754.603	810.681	745.482	863.267	756.766	838.442	832.851	915.515	700.245	851.023	731.932	699.184	723.921	778.082	810.016	835.646
A0A0H2ZVB8	1754.07	1315.95	1308.55	1304.68	458.244	608.36	460.314	534.629	632.725	549.414	751.726	644.233	617.919	502.24	553.857	637.291	694.157	1091.53	1535.01	1306.62	533.302	497.471	591.07	697.98	560.08	595.574	892.844
A0A0H2ZVC0	937.072	733.1	840.534	770.196	781.762	718.451	828.981	751.218	933.591	810.557	786.422	772.225	667.178	659.18	697.926	684.114	601.026	1233.65	835.086	805.365	750.106	790.099	872.074	779.324	663.179	691.02	917.339
A0A0H2ZVC1	286.857	337.969	260.202	320.349	266.488	300.173	527.765	737.344	665.539	741.628	712.037	704.578	1201.57	935.202	1246.95	987.164	1414.7	1816.49	312.413	290.275	283.331	632.555	703.584	708.307	1068.39	1117.06	1615.6
A0A0H2ZVC2	460.831	841.492	677.696	743.629	886.758	901.315	474.947	734.983	524.002	392.281	700.698	533.532	930.226	572.02	969.019	645.923	1190.73	1767.26	651.162	710.663	894.036	604.965	458.141	617.115	751.123	807.471	1478.99
A0A0H2ZVC3	903.135	805.296	772.433	741.467	927.426	854.69	895.618	840.341	1007.3	944.706	906.947	904.064	539.223	645.041	582.882	618.623	545.348	845.319	854.216	756.95	891.058	867.979	976.005	905.505	592.132	600.753	695.333
A0A0H2ZVC5	3197.13	2883.16	2193.87	1815.72	301.237	317.975	389.281	347.751	279.94	462.373	282.767	317.557	366.364	401.792	397.266	368.017	383.269	486.547	3040.15	2004.79	309.606	368.516	371.157	300.162	384.078	382.642	434.908
A0A0H2ZVC7	811.218	816.708	817.467	654.45	1042.96	715.084	1053.08	809.566	988.659	949.766	1007.5	876.51	442.694	768.444	478.007	643.327	472.04	917.963	813.963	735.959	879.023	931.322	969.213	942.004	605.569	560.667	695.001
A0A0H2ZVC8	475.492	716.033	613.67	581.877	675.657	593.117	670.807	838.034	890.781	729.516	1262.71	803.081	780.492	720.677	689.544	1128.56	747.005	828.971	595.762	597.773	634.387	754.421	810.148	1032.9	750.584	909.052	787.988
A0A0H2ZVD1	1978.83	1832.74	1214.71	1028.75	667.938	889.881	687.117	646.513	668.619	665.393	669.676	624.832	498.349	564.809	493.636	544.274	477.773	491.045	1905.79	1121.73	778.909	666.815	667.006	647.254	531.579	518.955	484.409
A0A0H2ZVD2	408.478	569.553	606.751	696.117	572.354	630.925	740.27	721.097	668.459	704.382	586.886	902.477	957.474	1138.62	1249.23	950.408	1045.36	588.681	489.015	651.434	601.64	730.684	686.42	744.682	1048.05	1099.82	817.021
A0A0H2ZVD3	797.611	932.681	872.076	864.783	858.902	846.393	878.129	877.43	880.584	890.653	842.857	886.391	658.33	634.063	661.783	634.758	612.218	637.211	865.146	868.429	852.647	877.78	885.618	864.624	646.197	648.271	624.714
A0A0H2ZVD5	1799.58	2186.48	736.85	972.346	688.968	618.631	1035.28	687.417	775.249	791.569	931.195	922.681	572.289	430.981	443.415	391.001	270.006	407.342	1993.03	854.598	653.8	861.347	783.409	926.938	501.635	417.208	338.674
A0A0H2ZVD6	501.619	701.03	775.311	740.586	798.226	876.086	641.894	799.119	694.264	783.75	634.171	845.339	996.188	996.519	876.024	843.16	976.206	427.611	601.324	757.948	837.156	720.506	739.007	739.755	996.353	859.592	701.908
A0A0H2ZVD7	545.639	415.122	525.923	499.945	733.086	612.568	845.635	607.219	760.672	619.311	755.107	580.864	904.708	878.821	892.629	853.55	907.498	1880.95	480.38	512.934	672.827	726.427	689.991	667.986	891.764	873.09	1394.23
A0A0H2ZVD9	668.923	869.657	555.744	670.513	658.424	676.343	447.038	686.778	553.235	492.786	682.485	685.914	1128.96	977.852	979.443	1217.3	1115.39	557.217	769.29	613.128	667.383	566.908	523.01	684.2	1053.41	1098.37	836.304
A0A0H2ZVE1	973.138	573.943	910.954	762.378	633.836	819.934	857.387	870.563	863.621	557.892	736.801	902.175	789.278	827.175	685.336	924.279	627.211	747.33	773.54	836.666	726.885	863.975	710.757	819.488	808.227	804.807	687.27
A0A0H2ZVE2	559.795	531.625	564.004	491.531	781.619	733.649	802.117	730.445	762.462	814.059	723.04	830.264	922.873	878.258	867.169	977.847	900.658	970.236	545.71	527.768	757.634	766.281	788.261	776.652	900.566	922.508	935.447
A0A0H2ZVE4	663.523	626.81	712.158	573.741	757.964	718.467	697.589	695.02	673.015	692.274	694.997	766.361	920.351	877.43	924.532	1105.45	879.483	846.491	645.166	642.949	738.216	696.305	682.644	730.679	898.89	1014.99	862.987
A0A0H2ZVE5	637.1	751.248	618.978	804.572	1106.49	831.073	916.646	988.695	878.807	699.901	737.23	772.67	648.541	765.011	758.299	663.176	708.373	854.867	694.174	711.775	968.781	952.67	789.354	754.95	706.776	710.737	781.62
A0A0H2ZVE6	621.03	676.31	748.806	867.634	602.725	732.996	853.911	879.556	959.628	839.473	812.572	799.122	810.639	804.255	782.221	787.334	755.443	687.576	648.67	808.22	667.861	866.734	899.551	805.847	807.447	784.777	721.51
A0A0H2ZVE9	3882.35	4044.83	1787.63	1138.01	320.816	247.507	364.636	304.117	311.035	281.84	303.468	201.917	272.86	566.651	301.828	460.59	290.523	143.184	3963.59	1462.82	284.162	334.376	296.437	252.693	419.756	381.209	216.854
A0A0H2ZVF1	715.653	658.144	700.451	625.05	789.656	731.322	808.353	732.524	831.198	749.055	842.94	705.835	732.794	756.36	769.399	676.303	772.567	1462.41	686.898	662.75	760.489	770.439	790.126	774.388	744.577	722.851	1117.49
A0A0H2ZVF3	785.463	929.478	860.896	750.977	755.318	906.269	857.604	871.226	773.137	844.696	765.483	783.091	712.937	735.204	778.957	699.218	742.932	632.563	857.471	805.937	830.793	864.415	808.916	774.287	724.07	739.088	687.747
A0A0H2ZVF4	796.851	938.023	663.856	948.692	728.551	811.349	560.011	810.601	654.14	717.577	707.513	861.552	1005.18	807.2	865.659	775.906	914.809	420.337	867.437	806.274	769.95	685.306	685.858	784.532	906.188	820.782	667.573
A0A0H2ZVF5	672.326	796.265	572.638	703.139	598.186	711.675	582.684	850.277	678.322	739.371	796.313	849.567	1034.75	894.456	929.543	862.182	958.854	615.136	734.295	637.888	654.93	716.481	708.846	822.94	964.603	895.863	786.995
A0A0H2ZVF6	525.792	933.476	512.601	1100.46	574.7	641.454	382.036	676.303	454.015	528.309	542.386	583.744	1243.76	907.072	1179.23	1053.51	1305.87	496.263	729.634	806.532	608.077	529.17	491.162	563.065	1075.41	1116.37	901.065
A0A0H2ZVF8	1009.26	983.646	703.096	744.221	637.651	805.624	719.29	1006.24	741.246	886.893	751.596	836.997	850.833	767.662	822.127	659.398	754.417	482.213	996.451	723.659	721.637	862.765	814.069	794.296	809.248	740.762	618.315
A0A0H2ZVF9	456.536	350.857	521.129	488.857	655.574	654.297	728.584	601.554	611.115	699.679	681.673	666.183	1076.08	750.502	1166.41	716.181	921.731	2106.11	403.697	504.993	654.936	665.069	655.397	673.928	913.289	941.298	1513.92
A0A0H2ZVG0	634.284	522.915	738.893	461.586	1025.67	791.665	874.282	778.411	950.647	759.234	943.539	739.56	575.914	625.831	620.959	647.202	644.843	1803.54	578.6	600.239	908.668	826.346	854.941	841.549	600.873	634.081	1224.19
A0A0H2ZVG3	614.294	730.844	677.361	727.859	779.832	830.714	850.542	816.476	793.265	781.291	842.292	736.942	831.597	776.68	812.613	789.971	737.616	885.073	672.569	702.61	805.273	833.509	787.278	789.617	804.139	801.292	811.345
A0A0H2ZVG4	1278.1	1464.46	1645.01	1568.89	317.029	261.608	994.396	799.655	709.768	717.099	515.386	384.467	820.37	562.755	738.098	480.781	336.218	1014.51	1371.28	1606.95	289.318	897.025	713.434	449.927	691.563	609.439	675.366
A0A0H2ZVG5	647.269	658.215	620.454	684.541	583.147	639.24	441.988	668.106	558.59	539.883	629.775	623.992	1128.74	1079.47	1028.72	1165.85	1156.73	754.27	652.742	652.497	611.194	555.047	549.237	626.883	1104.11	1097.29	955.499
A0A0H2ZVG6	500.527	571.773	511.478	557.995	820.755	866.802	773.851	880.721	860.944	867.387	767.528	964.464	928.981	841.343	838.247	770.928	857.917	753.991	536.15	534.737	843.778	827.286	864.166	865.996	885.162	804.587	805.954
A0A0H2ZVG7	450.236	524.313	643.584	616.945	967.164	1087.24	767.186	983.851	816.315	928.117	864.107	1024.71	820.319	678.208	858.235	790.496	721.301	496.301	487.274	630.265	1027.2	875.519	872.216	944.409	749.263	824.366	608.801
A0A0H2ZVG8	716.291	560.216	747.588	491.016	797.775	733.144	826.104	706.567	802.362	794.491	824.798	772.435	739.599	926.677	772.79	828.337	754.047	1186.92	638.253	619.302	765.46	766.335	798.427	798.617	833.138	800.563	970.481
A0A0H2ZVG9	627.614	784.862	614.585	776.135	607.83	697.452	641.553	959.658	806.399	821.466	738.518	845.765	984.339	817.709	1023.97	891.492	823.438	448.217	706.238	695.36	652.641	800.605	813.932	792.141	901.024	957.729	635.827
A0A0H2ZVH0	540.802	847.677	1302.55	734.813	633.896	858.263	652.978	974.353	652.721	938.119	645.026	930.213	699.584	634.08	819.492	652.242	1076	632.111	694.24	1018.68	746.079	813.665	795.42	787.62	666.832	735.867	854.053
A0A0H2ZVH1	620.033	738.27	655.949	729.933	650.782	752.59	541.892	785.097	611.716	690.517	673.429	811.96	1086.83	1012.55	932.047	940.773	1058.69	494.265	679.151	692.941	701.686	663.495	651.117	742.695	1049.69	936.41	776.477
A0A0H2ZVH3	946.479	1021.06	659.65	780.947	808.711	862.368	486.855	795.117	727.722	524.265	899.905	758.648	822.37	795.681	711.607	966.357	853.913	501.369	983.769	720.298	835.539	640.986	625.994	829.276	809.026	838.982	677.641
A0A0H2ZVH7	1062.17	1056.51	855.432	690.341	1040.39	1153.61	773.777	737.718	845.287	685.801	843.4	687.236	597.768	476.651	599.183	541.751	507.889	1233.83	1059.34	772.887	1097	755.747	765.544	765.318	537.209	570.467	870.858
A0A0H2ZVH8	764.487	784.186	834.579	876.726	806.277	779.001	761.188	750.547	798.446	813.591	765.697	816.868	754.189	724.024	719.446	735.819	797.714	831.427	774.337	855.653	792.639	755.868	806.019	791.282	739.107	727.633	814.57
A0A0H2ZVI0	801.767	533.629	921.774	575.206	706.957	614.302	796.6	582.784	841.271	884.213	813.461	812.971	698.839	770.636	714.002	627.092	736.804	1699.96	667.698	748.49	660.629	689.692	862.742	813.216	734.737	670.547	1218.38
A0A0H2ZVI4	645.898	694.736	795.191	810.551	851.553	889.282	811.83	787.552	837.823	862.341	745.832	896.755	761.962	795.285	753.143	741.829	785.353	625.668	670.317	802.871	870.418	799.691	850.082	821.293	778.623	747.486	705.511
A0A0H2ZVI5	923.422	731.555	707.414	492.566	907.535	798.636	843.58	699.646	780.771	760.127	809.398	712.398	645.05	915.347	727.686	934.314	695.861	931.94	827.488	599.99	853.086	771.613	770.449	760.898	780.199	831	813.9
A0A0H2ZVI6	407.01	614.736	577.311	641.076	787.014	875.212	668.071	802.247	581.187	712.465	639.7	739.755	1057.94	1050.71	1044.34	793.844	1054.15	769.835	510.873	609.194	831.113	735.159	646.826	689.728	1054.33	919.094	911.991
A0A0H2ZVI8	806.88	641.933	653.089	687.455	756.428	753.468	844.826	762.748	838.596	804.792	772.971	794.479	772.642	881.624	768.867	858.891	763.72	830.02	724.406	670.272	754.948	803.787	821.694	783.725	827.133	813.879	796.87
A0A0H2ZVJ1	605.506	1044.8	547.661	1036.24	795.831	771.375	671.031	802.688	770.528	167.294	998.011	321.537	745.647	841.47	851.231	998.867	866.129	948.228	825.152	791.949	783.603	736.859	468.911	659.774	793.559	925.049	907.178
A0A0H2ZVJ2	814.545	835.771	720.716	847.139	663.643	899.255	546.83	884.428	669.589	809.344	810.344	860.858	951.348	719.293	874.373	847.721	851.766	389.956	825.158	783.928	781.449	715.629	739.466	835.601	835.32	861.047	620.861
A0A0H2ZVJ4	1873.63	1512.69	3018.38	2464.14	419.895	434.312	322.502	252.524	224.734	260.434	166.626	187.329	571.331	699.994	717.946	768.93	424.291	479.831	1693.16	2741.26	427.104	287.513	242.584	176.977	635.662	743.438	452.061
A0A0H2ZVJ5	628.833	510.408	278.319	470.519	439.505	546.786	1246.25	956.628	1474.47	1621.04	1546.23	1505.88	396.24	713.367	494.193	520.845	371.097	423.82	569.621	374.419	493.146	1101.44	1547.76	1526.06	554.803	507.519	397.459
A0A0H2ZVJ6	739.976	451.667	602.509	368.809	816.198	716.236	945.606	677.456	879.913	827.475	827.211	1042.35	863.623	665.329	736.051	707.331	572.251	1639.7	595.822	485.659	766.217	811.531	853.694	934.781	764.476	721.691	1105.97
A0A0H2ZVJ7	731.598	650.329	756.414	780.732	776.67	731.831	817.466	745.648	857.906	845.288	759.271	899.572	746.897	766.739	744.445	743.063	796.243	926.387	690.964	768.573	754.251	781.557	851.597	829.422	756.818	743.754	861.315
A0A0H2ZVJ8	1239.07	1116.42	1092.73	748.662	722.294	730.908	720.122	765.022	747.758	759.685	723.664	747.955	684.409	526.96	632.526	525.255	604.624	1326.14	1177.75	920.698	726.601	742.572	753.722	735.809	605.684	578.891	965.382
A0A0H2ZVK0	1128.65	795.67	872.828	773.79	763.869	711.164	707.261	717.548	720.312	782.489	701.311	741.704	716.024	747.537	718.678	743.094	751.695	1078.15	962.163	823.309	737.516	712.405	751.401	721.507	731.78	730.886	914.921
A0A0H2ZVK1	1043.36	1074	1161.96	854.466	690.848	815.636	822.704	739.452	724.348	904.919	800.477	922.663	543.988	590.439	634.477	557.141	726.571	787.009	1058.68	1008.21	753.242	781.078	814.634	861.57	567.214	595.809	756.79
A0A0H2ZVK4	1833.94	1590.51	1214.58	846.885	417.221	440.409	765.909	784.383	743.487	814.811	701.668	743.581	549.116	539.711	555.277	552.406	523.509	950.884	1712.22	1030.73	428.815	775.146	779.149	722.624	544.414	553.842	737.197
A0A0H2ZVK5	1066.34	700.119	375.426	1189.56	547.655	786.661	2139.72	1020.27	1417.72	1084.21	1053.16	858.759	213.47	621.577	242.253	533.473	180.06	461.076	883.229	782.493	667.158	1580	1250.97	955.957	417.523	387.863	320.568
A0A0H2ZVK7	946.481	946.754	1027.15	778.855	1171.83	636.137	776.347	699.364	750.851	766.157	843.744	755.933	460.178	565.402	713.392	868.31	483.535	1071.69	946.617	903.003	903.982	737.855	758.504	799.838	512.79	790.851	777.611
A0A0H2ZVK8	600.235	766.505	607.424	614.17	777.14	864.457	753.883	868.858	781.614	932.074	736.996	855.008	899.956	842.818	980.441	750.793	772.466	608.618	683.37	610.797	820.799	811.371	856.844	796.002	871.387	865.617	690.542
A0A0H2ZVK9	983.443	1381.2	1075.68	833.853	952.78	1411.15	647.96	366.345	511.364	417.56	448.844	412.648	728.436	867.202	802.469	715.587	965.568	698.776	1182.32	954.766	1181.96	507.152	464.462	430.746	797.819	759.028	832.172
A0A0H2ZVL1	814.022	846.078	980.124	662.61	722.197	907.31	802.117	985.043	750.881	862.608	768.716	935.401	740.143	727.488	741.396	766.156	731.535	442.059	830.05	821.367	814.754	893.58	806.744	852.059	733.815	753.776	586.797
A0A0H2ZVL2	613.514	931.164	871.718	759.934	790.603	897.018	799.906	1013.43	861.746	950.315	829.057	885.13	829.522	744.568	687.176	738.113	701.175	240.219	772.339	815.826	843.81	906.669	906.031	857.093	787.045	712.645	470.697
A0A0H2ZVL3	1124.74	718.004	416.58	877.769	480.582	974.235	559.645	1117.45	796.855	562.576	994.306	712.363	919.817	805.737	757.892	1002.79	805.557	226.476	921.373	647.174	727.409	838.547	679.715	853.335	862.777	880.339	516.016
A0A0H2ZVL4	1248.82	680.28	862.292	646.586	533.288	437.069	520.463	518.504	468.234	812.391	485.923	564.715	1050.21	691.996	961.988	693.011	893.812	2030.54	964.551	754.439	485.178	519.483	640.312	525.319	871.104	827.5	1462.18
A0A0H2ZVL5	664.744	721.547	832.05	749.74	855.06	865.583	796.709	805.338	757.703	846.671	743.055	829.729	737.299	798.327	753.104	743.259	852.006	739.613	693.146	790.895	860.322	801.023	802.187	786.392	767.813	748.182	795.81
A0A0H2ZVL6	973.953	621.311	570.941	713.157	801.607	678.879	563.271	575.16	608.959	501.859	585.005	620.57	969.879	804.896	765.529	931.303	1075.11	1500.48	797.632	642.049	740.243	569.215	555.409	602.787	887.387	848.416	1287.79
A0A0H2ZVM0	945.583	795.32	755.227	950.29	601.561	567.309	500.206	777.933	663.876	499.405	896.974	579.458	896.776	928.589	816.14	1101.45	838.931	682.019	870.451	852.759	584.435	639.07	581.641	738.216	912.682	958.797	760.475
A0A0H2ZVM1	713.12	604.952	654.973	597.699	764.957	799.013	941.737	799.064	817.171	918.607	1014.1	887.224	653.142	865.337	731.796	834.846	674.481	737.04	659.036	626.336	781.985	870.4	867.889	950.663	759.24	783.321	705.76
A0A0H2ZVM2	891.186	1017.34	1443.61	1047.45	704.674	793.577	738.339	820.882	645.402	853.099	641.291	834.149	648.126	653.341	709.488	623.841	760.274	558.158	954.263	1245.53	749.125	779.611	749.251	737.72	650.734	666.665	659.216
A0A0H2ZVM3	385.087	776.033	380.925	386.76	427.085	458.576	899.556	997.975	1051.02	1051.11	1032.82	1021.53	840.546	716.871	888.339	612.903	859.017	1153.27	580.56	383.843	442.83	948.766	1051.06	1027.17	778.708	750.621	1006.14
A0A0H2ZVM4	796.33	860.788	480.621	710.898	675.977	778.024	425.223	718.686	565.942	452.978	769.936	524.668	956.448	903.938	936.825	1174.01	1182.32	741.908	828.559	595.76	727.001	571.954	509.46	647.302	930.193	1055.42	962.115
A0A0H2ZVM5	1094.31	1288.5	991.311	1117.46	845.23	816.009	671.208	759.918	714.758	943.654	777.227	950.567	617.07	551.459	718.775	408.202	681.922	502.63	1191.41	1054.39	830.619	715.563	829.206	863.897	584.264	563.488	592.276
A0A0H2ZVM7	716.704	815.735	689.912	733.551	919.037	961.672	808.126	771.864	790.962	810.331	823.222	779.386	714.991	773.982	762.325	737.08	754.326	730.549	766.22	711.731	940.355	789.995	800.646	801.304	744.486	749.702	742.437
A0A0H2ZVM8	878.045	603.073	540.058	418.806	691.461	533.335	726.338	613.674	711.583	442.289	972.739	507.086	313.617	1554.6	743.273	1579.1	1309.79	274.699	740.559	479.432	612.398	670.006	576.936	739.913	934.11	1161.19	792.245
A0A0H2ZVM9	1248.95	830.045	391.12	802.838	679.739	907.786	530.637	787.139	919.586	696.87	914.53	788.268	784.294	868.294	733.155	892.432	722.423	450.748	1039.5	596.979	793.762	658.888	808.228	851.399	826.294	812.794	586.585
A0A0H2ZVN0	696.711	778.617	780.057	720.828	896.2	923.345	802.442	893.693	756.735	883.239	754.806	832.814	765.978	775.095	765.79	708.529	776.485	619.6	737.664	750.443	909.772	848.067	819.987	793.81	770.537	737.16	698.043
A0A0H2ZVN1	629.84	573.46	674.357	589.76	784.6	737.327	766.032	714.539	772.709	702.693	758.992	670.785	817.368	819.407	884.598	851.551	840.939	1344.87	601.65	632.058	760.964	740.285	737.701	714.888	818.387	868.074	1092.9
A0A0H2ZVN2	810.175	1912.36	866.738	1568.86	864.166	1077.51	776.154	459.991	838.973	398.082	805.446	355.049	651.606	578.332	675.399	468.841	748.061	474.439	1361.27	1217.8	970.839	618.072	618.528	580.247	614.969	572.12	611.25
A0A0H2ZVN3	525.041	846.015	786.09	591.562	744.588	851.073	875.769	1037.54	779.938	1238.14	894.638	1028.48	685.131	667.618	745.93	522.188	898.549	497.065	685.528	688.826	797.831	956.654	1009.04	961.558	676.374	634.059	697.807
A0A0H2ZVN5	776.116	876.14	846.586	815.671	769.864	811.874	791.087	833.308	837.275	802.642	829.799	779.181	748.124	746.269	711.674	751.986	701.364	696.597	826.128	831.128	790.869	812.197	819.958	804.49	747.197	731.83	698.98
A0A0H2ZVN7	734.411	555.402	532.173	565.12	801.729	769.066	667.142	739.872	786.993	761.909	750.495	787.287	944.003	775.268	829.275	943.727	843.426	1093.93	644.906	548.646	785.397	703.507	774.451	768.891	859.635	886.501	968.68
A0A0H2ZVN9	1234.78	1091.42	1206.95	1024.91	829.099	779.526	685.802	690.993	687.783	765.173	697.474	789.879	637.456	488.516	610.8	521.964	614.02	1107.27	1163.1	1115.93	804.313	688.398	726.478	743.677	562.986	566.382	860.644
A0A0H2ZVP0	1074.2	851.754	948.015	540.193	877.446	732.044	948.632	838.131	789.901	990.042	840.819	968.509	489.328	547.929	644.887	457.751	551.941	1351.37	962.978	744.104	804.745	893.382	889.971	904.664	518.629	551.319	951.656
A0A0H2ZVP2	614.412	473.035	469.539	200.608	364.933	207.282	1028.26	1490.24	1366.39	1530.91	1427.05	1693.35	598.708	650.577	627.275	669.241	374.399	310.284	543.723	335.073	286.107	1259.25	1448.65	1560.2	624.643	648.258	342.341
A0A0H2ZVP3	820.51	1058.99	608.623	659.544	459.173	507.194	828.263	914.286	847.361	967.237	848.178	839.786	877.004	729.33	894.435	728.799	737.696	737.233	939.75	634.083	483.184	871.274	907.299	843.982	803.167	811.617	737.464
A0A0H2ZVP4	712.139	646.099	534.713	853.204	344.768	443.028	738.724	765.116	830.335	736.083	876.244	834.409	1044.5	1007.93	938.349	900.737	810.123	761.933	679.119	693.958	393.898	751.92	783.209	855.327	1026.22	919.543	786.028
A0A0H2ZVP5	694.079	633.275	778.704	695.748	704.532	760.469	707.515	752.836	669.899	743.81	667.905	833.031	861.601	860.905	905.3	837.985	951.831	903.041	663.677	737.226	732.5	730.176	706.855	750.468	861.253	871.643	927.436
A0A0H2ZVP7	889.05	624.331	1189.95	2249.21	522.795	476.552	830.47	802.356	1050.08	781.4	879.349	700.205	751.782	719.869	652.086	569.381	365.065	236.935	756.691	1719.58	499.674	816.413	915.74	789.777	735.825	610.733	301
A0A0H2ZVP9	1156.11	1274.77	1252.27	1254.43	630.27	592.653	592.573	646.895	514.141	530.561	598.994	527.536	760.598	840.902	796.505	829.476	837.465	545.191	1215.44	1253.35	611.462	619.734	522.351	563.265	800.75	812.99	691.328
A0A0H2ZVQ0	545.627	660.754	731.726	820.765	916.917	925.866	765.669	796.303	757.17	869.641	751.103	892.057	802.991	777.579	806.51	769.05	862.166	586.762	603.191	776.245	921.392	780.986	813.405	821.58	790.285	787.78	724.464
A0A0H2ZVQ1	535.228	638.707	590.692	603.436	908.947	943.752	842.775	816.092	805.023	873.643	823.885	836.638	810.05	850.401	835.268	695.546	766.441	847.851	586.967	597.064	926.349	829.434	839.333	830.262	830.226	765.407	807.146
A0A0H2ZVQ2	624.317	787.185	636.897	854.328	726.556	825.584	473.56	734.744	590.434	532.619	585.942	772.222	1057.61	927.272	935.947	890.544	1191.9	657.601	705.751	745.612	776.07	604.152	561.527	679.082	992.443	913.246	924.75
A0A0H2ZVQ3	481.033	440.059	283.716	604.778	626.408	893.026	608.436	977.514	758.466	810.123	961.859	991.386	996.882	999.361	1019.78	941.764	973.019	313.229	460.546	444.247	759.717	792.975	784.295	976.622	998.121	980.773	643.124
A0A0H2ZVQ6	1051.1	778.796	767.676	823.057	776.007	883.066	769.56	825.713	701.011	813.867	762.551	844.668	734.463	869.857	761.45	699.961	722.497	567.293	914.948	795.367	829.537	797.637	757.439	803.609	802.16	730.705	644.895
A0A0H2ZVQ7	581.091	784.014	501.227	737.395	658.098	832.213	488.66	831.777	681.501	758.996	805.334	864.678	1126.86	870.981	896.466	922.388	1024.12	411.901	682.553	619.311	745.156	660.218	720.248	835.006	998.923	909.427	718.013
A0A0H2ZVQ8	734.004	888.868	778.627	846.592	792.157	818.88	706.831	752.939	733.826	697.3	725.485	748.831	854.711	752.122	818.029	754.736	822.316	835.577	811.436	812.61	805.519	729.885	715.563	737.158	803.417	786.383	828.947
A0A0H2ZVQ9	555.453	633.173	652.629	744.404	939.968	783.043	747.381	704.142	639.97	714.348	642.509	749.525	884.69	881.113	892.234	919.606	961.599	851.061	594.313	698.517	861.505	725.762	677.159	696.017	882.901	905.92	906.33
A0A0H2ZVR0	586.843	664.062	707.275	619.893	853.426	797.194	873.39	784.275	761.164	804.916	784.482	789.941	803.478	867.01	811.484	851.003	776.452	848.133	625.452	663.584	825.31	828.832	783.04	787.211	835.244	831.243	812.292
A0A0H2ZVR2	521.098	521.608	469.796	442.879	937.561	810.308	789.803	850.883	907.58	893.652	854.364	806.109	738.024	841.446	801.153	704.156	856.196	1214.92	521.353	456.338	873.934	820.343	900.616	830.237	789.735	752.654	1035.56
A0A0H2ZVR3	713.559	762.304	719.759	626.395	859.815	722.805	834.501	747.236	814.398	642.367	830.664	662.697	738.67	719.086	737.635	716.344	734.506	1487.1	737.932	673.077	791.31	790.868	728.382	746.68	728.878	726.989	1110.8
A0A0H2ZVR4	745.626	654.62	877.321	1196.87	699.623	925.791	585.552	744.137	692.389	662.597	603.222	840.867	912.204	631.974	868.139	739.008	971.719	723.048	700.123	1037.09	812.707	664.844	677.493	722.044	772.089	803.574	847.384
A0A0H2ZVR6	804.695	813.274	1185.13	1489.89	502.556	447.058	791.468	825.442	851.785	867.065	926.963	808.335	691.695	755.235	701.633	628.061	615.614	511.506	808.984	1337.51	474.807	808.455	859.425	867.649	723.465	664.847	563.56
A0A0H2ZVR7	1544.77	1236.09	1177.66	809.093	617.389	703.188	708.11	719.953	661.144	813.09	680.114	782.665	636.327	669.266	606.427	753.83	606.429	659.182	1390.43	993.375	660.289	714.031	737.117	731.389	652.796	680.128	632.806
A0A0H2ZVR8	337.003	1069.42	970.249	1279.11	73.93	347.092	248.111	592.321	423.368	438.998	266.937	552.954	1964.6	1211.38	1595.34	1007.96	866.861	352.01	703.214	1124.68	210.511	420.216	431.183	409.946	1587.99	1301.65	609.435
A0A0H2ZVS1	672.607	271.26	411.049	529.026	712.83	721.442	1045.49	736.577	733.226	605.167	636.201	645.015	1263.37	502.388	824.376	491.86	613.81	2662.48	471.933	470.037	717.136	891.032	669.197	640.608	882.876	658.118	1638.14
A0A0H2ZVS3	681.211	861.084	820.087	919.077	1369.57	1273.33	926.313	790.858	780.811	796.736	914.043	837.801	488.929	612.025	628.213	503.828	497.335	670.047	771.147	869.582	1321.45	858.586	788.773	875.922	550.477	566.02	583.691
A0A0H2ZVS4	1708.13	1441.98	1600.21	1428.15	599.294	597.459	870.339	753.453	716.136	771.088	595.357	579.967	459.634	516.775	466.867	540.599	425.113	640.413	1575.05	1514.18	598.376	811.896	743.612	587.662	488.204	503.733	532.763
A0A0H2ZVS5	533.263	732.902	870.917	655.916	921.204	998.057	803.799	847.782	771.75	1167.8	766.668	1138.91	719.147	736.758	795.619	444.075	807.007	556.772	633.083	763.416	959.63	825.791	969.775	952.791	727.952	619.847	681.89
A0A0H2ZVS7	1481.3	460.951	517.537	562.66	513.127	617.775	757.18	616.267	621.293	633.565	761.982	662.161	715.542	731.782	991.417	724.562	684.631	2027.06	971.126	540.098	565.451	686.724	627.429	712.072	723.662	857.989	1355.84
A0A0H2ZVS8	796.419	369.112	267.796	265.555	201.999	233.445	585.859	985.234	855.502	861.347	1166	1551.04	1106.36	1017.22	1163.97	985.442	583.43	646.834	582.766	266.676	217.722	785.547	858.424	1358.52	1061.79	1074.71	615.132
A0A0H2ZVT2	605.987	691.306	828.144	993.085	962.95	931.111	757.341	761.303	799.581	832.873	642.291	829.533	799.296	728.786	795.667	746.877	808.216	600.279	648.647	910.615	947.031	759.322	816.227	735.912	764.041	771.272	704.247
A0A0H2ZVT3	996.624	417.837	772.294	508.664	692.71	562.333	906.198	524.142	684.48	556.685	769.74	493.728	785.562	577.165	821.943	633.349	627.014	2801.05	707.231	640.479	627.522	715.17	620.583	631.734	681.364	727.646	1714.03
A0A0H2ZVT4	530.702	663.323	1044.06	662.068	637.944	799.43	684.648	906.151	731.557	929.885	677.677	931.044	788.181	783.837	915.595	652.071	959.23	816.033	597.013	853.066	718.687	795.4	830.721	804.36	786.009	783.833	887.631
A0A0H2ZVT5	616.533	1233.16	1023.46	908.659	1120.06	1474.15	341.885	404.282	285.149	522.632	314.949	391.387	1064.02	741.016	1115.25	672.912	1094.37	804.915	924.845	966.059	1297.1	373.083	403.891	353.168	902.519	894.082	949.641
A0A0H2ZVT7	503.718	560.128	570.129	801.794	912.278	1109.68	606.013	842.768	652.611	1042.51	489.9	1206.09	973.853	752.818	999.562	528.586	1146.28	383.499	531.923	685.961	1010.98	724.391	847.561	847.995	863.335	764.074	764.888
A0A0H2ZVT8	574.052	646.217	352.571	627.933	525.481	565.332	447.381	751.86	590.647	618.439	942.175	485.505	1252.07	1190.94	1134.72	1279.59	875.323	585.164	610.135	490.252	545.407	599.62	604.543	713.84	1221.51	1207.16	730.243
A0A0H2ZVT9	525.018	598.874	766.966	582.214	869.666	829.502	880.64	813.261	804.625	962.861	734.123	889.871	821.707	807.294	805.566	882.375	762.966	679.488	561.946	674.59	849.584	846.951	883.743	811.997	814.501	843.97	721.227
A0A0H2ZVU1	703.753	813.824	763.276	671.961	894.095	817.447	884.372	810.731	838.021	915.724	845.198	878.724	676.764	718.308	708.591	726.122	697.763	782.699	758.788	717.619	855.771	847.551	876.872	861.961	697.536	717.356	740.231
A0A0H2ZVU5	2041.5	861.528	446.535	711.742	617.393	701.141	803.192	751.939	591.746	740.857	851.367	748.384	314.198	945.289	655.425	931.396	830.209	589.526	1451.51	579.139	659.267	777.566	666.302	799.876	629.743	793.41	709.868
A0A0H2ZVU7	828.388	761.041	899.826	927.107	680.683	669.938	705.62	672.971	659.292	496.98	712.99	442.028	780.762	822.337	905.018	918.255	834.087	1253.8	794.715	913.466	675.311	689.296	578.136	577.509	801.55	911.636	1043.95
A0A0H2ZVU8	1418.54	1223.26	1291.2	1661.35	849.944	761.189	486.564	729.854	646.297	453.826	591.353	566.908	735.536	553.999	505.727	802.931	696.196	371.992	1320.9	1476.27	805.567	608.209	550.061	579.13	644.768	654.329	534.094
A0A0H2ZVU9	784.417	928.629	774.243	836.055	827.312	900.901	772.246	875.128	833.655	915.745	823.576	876.198	723.427	636.138	700.326	579.989	756.541	680.63	856.523	805.149	864.106	823.687	874.7	849.887	679.782	640.157	718.586
A0A0H2ZVV0	637.637	553.238	536.694	447.55	850.276	659.313	846.415	716.042	1064.66	735.877	896.195	718.022	737.285	988.226	657.045	1071.59	700.917	993.326	595.438	492.122	754.794	781.228	900.27	807.108	862.755	864.319	847.122
A0A0H2ZVV1	763.472	594.354	767.153	715.411	797.085	816.412	795.493	758.076	828.74	768.232	830.328	754.483	774.988	677.114	765.853	717.391	672.506	1304.42	678.913	741.282	806.749	776.784	798.486	792.406	726.051	741.622	988.462
A0A0H2ZVV2	856.672	912.557	919.721	786.744	993.371	1012.01	957.043	863.119	853.233	923.657	801.522	874.62	551.223	701.054	629.583	562.475	568.577	591.599	884.615	853.233	1002.69	910.081	888.445	838.071	626.139	596.029	580.088
A0A0H2ZVV3	555.724	109.727	554.784	368.467	412.875	295.664	479.669	393.29	504.433	293.417	677.625	389.501	1472.92	764.039	1217.02	1227.63	872.226	2886.57	332.725	461.626	354.269	436.48	398.925	533.563	1118.48	1222.33	1879.4
A0A0H2ZVV4	590.119	705.284	706.16	743.845	928.777	889.588	831.25	822.783	873.078	806.258	859.855	698.52	691.783	834.222	738.874	746.217	744.918	837.427	647.701	725.002	909.182	827.017	839.668	779.188	763.003	742.545	791.173
A0A0H2ZVV5	626.747	560.722	686.932	637.112	935.941	782.023	829.113	720.939	788.208	742.167	784.461	698.875	751.616	827.742	770.995	805.206	791.16	1253.44	593.735	662.022	858.982	775.026	765.188	741.668	789.679	788.101	1022.3
A0A0H2ZVV6	830.548	451.078	464.243	466.682	930.8	724.84	796.092	779.707	940.808	789.852	843.205	813.45	698.864	853.156	679.964	937.003	762.219	1154.46	640.813	465.462	827.82	787.9	865.33	828.327	776.01	808.484	958.337
A0A0H2ZVV7	347.035	406.992	381.101	557.729	459.764	506.464	398.136	549.177	448.471	656.176	569.2	569.94	1422.9	1202.47	1291.28	1282.67	1309.8	983.487	377.014	469.415	483.114	473.656	552.323	569.57	1312.69	1286.97	1146.64
A0A0H2ZVV9	655.399	731.554	839.393	730.331	858.604	948.262	574.713	788.737	669.495	748.969	698.832	836.334	816.995	874.146	865.227	826.747	962.715	562.672	693.476	784.862	903.433	681.725	709.232	767.583	845.57	845.987	762.693
A0A0H2ZVW0	572.456	955.282	689.545	937.294	692.53	849.037	754.495	856.053	698.019	598.33	568.123	832.436	1042.03	815.657	962.165	880.388	926.158	319.281	763.869	813.419	770.783	805.274	648.175	700.279	928.845	921.276	622.72
A0A0H2ZVW1	754.752	766.794	805.741	786.1	661.305	961.395	728.933	716.096	697.797	643.338	752.666	678.794	886.605	885.228	837.925	856.065	832.043	724.784	760.773	795.92	811.35	722.514	670.567	715.73	885.916	846.995	778.414
A0A0H2ZVW3	745.733	1113.37	469.954	952.873	364.755	448.757	423.199	958.283	582.536	361.413	665.216	520.572	1340.72	933.947	1120.57	1303.17	1031.3	227.535	929.551	711.414	406.756	690.741	471.974	592.894	1137.33	1211.87	629.417
A0A0H2ZVW4	1316.03	1193.16	1213.77	1065.82	671.848	666.21	850.168	743.787	739.266	782.307	676.992	712.639	601.14	592.683	616.152	579.504	559.253	884.942	1254.59	1139.79	669.029	796.977	760.786	694.815	596.911	597.828	722.098
A0A0H2ZVW7	508.937	791.548	600.613	636.822	633.12	560.12	602.27	644.685	655.02	366.856	779.619	423.945	1003.08	1113.71	983.976	1751.04	1036.67	280.619	650.243	618.717	596.62	623.478	510.938	601.782	1058.39	1367.51	658.646
A0A0H2ZVW9	621.076	785.58	612.483	674.123	787.749	832.148	899.376	888.861	843.532	900.073	885.85	836.995	750.02	760.815	774.049	698.089	759.636	760.926	703.328	643.303	809.948	894.119	871.803	861.423	755.417	736.069	760.281
A0A0H2ZVX0	511.156	812.494	749.196	742.535	1386.28	1293.01	936.837	975.952	949.206	718.657	951.029	1041.48	534.128	438.342	505.887	563.845	527.86	696.144	661.825	745.865	1339.64	956.395	833.932	996.254	486.235	534.866	612.002
A0A0H2ZVX1	1028.53	1122.34	850.22	1213.06	602.024	543.133	962.179	688.766	853.826	278.479	755.23	343.982	631.586	550.813	759.212	834.765	653.836	1478.18	1075.44	1031.64	572.579	825.473	566.152	549.606	591.199	796.989	1066.01
A0A0H2ZVX2	1087.91	1952.9	969.115	1252.68	485.357	523.325	411.814	683.737	531.835	599.645	556.426	689.572	1088.1	642.854	881.447	584.85	965.247	312.782	1520.4	1110.9	504.341	547.776	565.74	622.999	865.478	733.148	639.015
A0A0H2ZVX3	1565.24	2019.53	1757.04	2210.02	485.959	530.643	680.693	399.583	410.377	305.936	602.387	348.015	625.591	488.181	760.342	560.283	494.073	384.409	1792.38	1983.53	508.301	540.138	358.156	475.201	556.886	660.313	439.241
A0A0H2ZVX4	966.339	1028.43	879.025	972.044	747.541	436.39	1652.19	1584.89	1407.92	1199.46	885.797	634.61	306.188	431.153	278.19	506.886	170.859	553.696	997.382	925.534	591.966	1618.54	1303.69	760.203	368.67	392.538	362.278
A0A0H2ZVX9	643.185	622.724	776.354	668.781	796.67	736.835	874.821	759.629	800.759	766.988	824.888	742.311	699.705	906.467	771.737	842.572	793.407	960.801	632.954	722.567	766.752	817.225	783.874	783.599	803.086	807.154	877.104
A0A0H2ZVY3	714.016	678.29	732.087	846.588	569.392	734.071	459.944	687.156	478.465	615.182	632.227	662.749	1159.97	827.197	1135.52	993.944	971.694	906.843	696.153	789.337	651.731	573.55	546.823	647.488	993.582	1064.73	939.268
A0A0H2ZVY4	2500.74	3363.66	2310.29	1857.1	350.306	262.613	468.677	295.617	445.948	280.457	380.701	283.341	409.619	409.192	434.641	357.621	393.561	307.207	2932.2	2083.69	306.459	382.147	363.202	332.021	409.405	396.131	350.384
A0A0H2ZVY5	779.267	941.967	512.5	829.919	495.583	718.071	373.327	675.573	475.041	472.083	645.448	700.871	1223.2	960.066	1028.5	1035.66	1220.79	580.234	860.617	671.21	606.827	524.45	473.562	673.159	1091.63	1032.08	900.513
A0A0H2ZVY6	596.601	632.83	561.626	758.469	728.305	737.782	635.557	755.353	753.162	829.018	775.292	794.078	928.317	1012.2	922.726	945.06	943.734	492.993	614.715	660.047	733.044	695.455	791.09	784.685	970.257	933.893	718.363
A0A0H2ZVY7	1116.53	700.418	917.836	810.55	670.214	551.785	943.798	535.564	770.021	581.629	741.461	555.886	649.4	565.196	677.253	689.935	644.753	2099.97	908.474	864.193	611	739.681	675.825	648.674	607.298	683.594	1372.36
A0A0H2ZVY8	502.298	707.983	336.892	406.614	861.96	920.41	907.278	1116.03	888.761	1000.11	995.963	1014.92	782.428	670.714	690.627	781.876	859.984	532.686	605.141	371.753	891.185	1011.65	944.435	1005.44	726.571	736.252	696.335
A0A0H2ZVY9	488.835	626.441	591.567	681.888	672.567	856.367	835.173	938.751	787.157	829.923	789.498	859.898	879.168	892.026	984.831	858.481	845.804	491.408	557.638	636.727	764.467	886.962	808.54	824.698	885.597	921.656	668.606
A0A0H2ZVZ0	1075.6	1189.23	900.516	806.926	750.758	754.724	735.46	759.287	772.225	814.013	750.572	776.698	744.76	688.789	696.259	659.721	657.056	729.53	1132.42	853.721	752.741	747.373	793.119	763.635	716.775	677.99	693.293
A0A0H2ZVZ1	890.543	823.405	886.919	939.702	744.09	776.44	768.843	813.891	858.738	846.975	726.656	825.101	694.447	708.217	723.984	682.671	755.292	731.008	856.974	913.31	760.265	791.367	852.856	775.878	701.332	703.328	743.15
A0A0H2ZVZ4	995.034	929.6	968.516	996.369	686.431	722.694	570.574	692.586	586.732	615.397	654.869	700.254	860.776	876.122	842.783	786.875	861.453	723.048	962.317	982.442	704.563	631.58	601.064	677.561	868.449	814.829	792.251
A0A0H2ZVZ5	562.56	805.86	616.949	902.121	643.242	939.781	498.043	753.664	480.381	635.265	548.496	786.096	1178.31	904.034	1104.6	830.508	1166.26	475.295	684.21	759.535	791.511	625.854	557.823	667.296	1041.17	967.556	820.777
A0A0H2ZVZ6	792.731	703.899	967.582	697.25	785.189	787.765	735.314	744.417	689.448	748.55	712.736	762.128	801.905	729.109	825.848	771.883	730.889	1134.12	748.315	832.416	786.477	739.866	718.999	737.432	765.507	798.865	932.503
A0A0H2ZVZ7	623.713	685.331	625.542	669.539	863.114	950.897	785.538	863.523	852.416	890.22	882.399	840.982	773.947	923.941	738.339	838.072	777.722	386.303	654.522	647.541	907.006	824.531	871.318	861.691	848.944	788.205	582.013
A0A0H2ZVZ8	666.745	729.637	522.101	650.514	781.764	824.667	751.539	780.717	919.138	724.196	806.085	893.371	869.992	857.755	748.42	798.485	824.177	790.356	698.191	586.307	803.216	766.128	821.667	849.728	863.874	773.452	807.266
A0A0H2ZVZ9	601.537	1092.44	432.138	271.249	453.669	615.669	567.731	1042.97	823.271	621.142	768.365	892.165	1253.35	1345.86	828.572	806.621	1010.91	270.822	846.988	351.693	534.669	805.352	722.206	830.265	1299.6	817.596	640.867
A0A0H2ZW00	664.398	797.697	536.03	763.575	734.501	844.374	635.084	953.797	718.183	703.923	951.639	879.787	862.277	843.704	835.065	848.671	900.388	416.362	731.047	649.802	789.438	794.44	711.053	915.713	852.991	841.868	658.375
A0A0H2ZW01	922.502	815.698	864.937	648.838	795.216	763.631	824.341	780.62	815.208	836.45	857.839	850.857	671.761	661.722	659.815	716.355	647.83	1061.29	869.1	756.887	779.423	802.481	825.829	854.348	666.742	688.085	854.558
A0A0H2ZW05	688.495	711.191	493.205	344.774	962.306	963.752	1082.72	1173.65	1195.37	1335.85	1047.39	1505.3	490.816	465.855	524.001	409.797	516.766	478.832	699.843	418.989	963.029	1128.18	1265.61	1276.34	478.336	466.899	497.799
A0A0H2ZW06	1033.15	913.358	920.545	798.676	933.827	767.371	719.343	680.048	715.386	603.425	704.988	596.236	740.167	738.382	628.234	810.222	700.417	1148.65	973.254	859.61	850.599	699.696	659.405	650.612	739.275	719.228	924.531
A0A0H2ZW07	728.324	786.799	998.446	897.775	824.022	876.249	642.812	865.503	753.607	948.945	706.804	975.488	808.073	722.346	783.298	672.263	776.692	425.069	757.562	948.11	850.136	754.158	851.276	841.146	765.21	727.78	600.881
A0A0H2ZW09	2654.01	2373.12	2572.13	1817	348.277	374.367	537.372	342.264	396.786	306.535	354.177	268.41	287.926	324.438	369.639	369.063	299.007	1182.66	2513.57	2194.57	361.322	439.818	351.661	311.293	306.182	369.351	740.832
A0A0H2ZW10	1331.63	1182.84	1875.25	1731.88	514.775	505.241	807.901	671.637	659.573	733.587	496.806	564.87	579.804	579.772	585.348	581.413	554.375	657.182	1257.23	1803.56	510.008	739.769	696.58	530.838	579.788	583.38	605.779
A0A0H2ZW11	1026.51	905.261	1083.11	966.295	678.143	635.966	888.079	709.651	843.847	770.766	763.756	733.029	643.726	738.453	638.256	661.191	585.788	1008.12	965.884	1024.7	657.054	798.865	807.306	748.392	691.09	649.723	796.954
A0A0H2ZW15	249.747	548.366	520.862	477.015	787.486	875.817	558.477	754.628	651.87	438.586	575.683	638.855	1033.66	1017.03	1032.52	1069.22	1327.19	1041.06	399.057	498.938	831.652	656.553	545.228	607.269	1025.35	1050.87	1184.13
A0A0H2ZW16	1304.12	935.876	532.475	789.856	664.064	699.345	409.344	660.11	522.158	463.359	622.212	540.838	930.936	1072.6	840.8	1277.89	1095.56	352.468	1120	661.165	681.705	534.727	492.758	581.525	1001.77	1059.34	724.015
A0A0H2ZW17	680.352	814.356	505.388	700.953	645.2	561.341	485.379	671.963	589.683	479.108	704.496	510.982	1062.33	1002.19	946.211	1484.74	1163.6	485.201	747.354	603.17	603.27	578.671	534.395	607.739	1032.26	1215.48	824.402
A0A0H2ZW18	1012.93	1210.06	891.568	745.012	734.18	485.265	483.701	1177.75	557.486	1148.06	532.635	909.877	708.848	502.637	1110.97	461.776	989.327	699.972	1111.49	818.29	609.722	830.723	852.772	721.256	605.743	786.372	844.65
A0A0H2ZW20	1188.13	1025.28	1156.14	996.621	783.071	697.033	752.982	712.453	802.584	819.29	756.325	857.159	587.876	596.731	573.279	640.26	590.731	845.821	1106.7	1076.38	740.052	732.718	810.937	806.742	592.303	606.769	718.276
A0A0H2ZW21	571.747	438.543	770.875	464.468	850.884	567.544	784.997	657.976	695.911	697.976	641.107	725.857	873.035	660.806	856.117	837.552	907.854	1963.83	505.145	617.671	709.214	721.486	696.943	683.482	766.921	846.834	1435.84
A0A0H2ZW23	759.869	675.648	843.473	698.796	704.094	680.059	730.919	673.547	742.962	680.118	733.981	650.853	856.031	690.005	802.015	743.756	807.847	1579.53	717.759	771.134	692.077	702.233	711.54	692.417	773.018	772.886	1193.69
A0A0H2ZW24	872.088	554.202	692.583	597.063	819.601	838.658	976.017	697.38	1088.57	914.434	857.987	865.26	609.02	694.52	579.98	625.463	561.772	1360.66	713.145	644.823	829.129	836.699	1001.5	861.623	651.77	602.722	961.216
A0A0H2ZW25	716.318	489.774	632.554	419.799	946.678	584.671	829.741	614.368	808.038	688.191	802.729	634.613	709.794	633.908	696.099	676.117	825.011	2336.48	603.046	526.177	765.675	722.054	748.115	718.671	671.851	686.108	1580.75
A0A0H2ZW27	707.867	516.008	793.149	588.279	859.533	735.401	862.936	970.362	796.724	1106.17	773.659	897.435	639.713	812.898	764.99	623.568	813.443	902.266	611.938	690.714	797.467	916.649	951.444	835.547	726.305	694.279	857.855
A0A0H2ZW29	1043.73	904.954	957.319	1037.08	659.655	682.064	468.648	716.24	531.661	699.4	753.155	646.338	900.647	864.907	812.905	1069.93	867.132	325.152	974.344	997.197	670.859	592.444	615.53	699.746	882.777	941.419	596.142
A0A0H2ZW31	670.199	759.676	621.012	668.357	825.488	759.987	804.3	787.627	739.979	740.413	780.8	701.295	942.637	823.941	752.707	895.543	786.915	879.18	714.937	644.685	792.738	795.963	740.196	741.047	883.289	824.125	833.047
A0A0H2ZW32	887.434	487.073	848.747	867.941	765.448	689.494	757.457	599.348	720.182	778.485	817.913	829.807	743.54	759.96	717.945	987.243	760.781	967.462	687.253	858.344	727.471	678.402	749.333	823.86	751.75	852.594	864.122
A0A0H2ZW35	682.735	557.536	449.179	561.271	991.742	808.52	877.232	756.767	1078.75	802.499	725.176	791.729	736.74	789.873	683.613	887.29	729.874	1062.42	620.136	505.225	900.131	816.999	940.626	758.453	763.306	785.452	896.148
A0A0H2ZW37	719.137	663.279	693.637	606.881	768.986	839.379	773.314	778.398	789.375	821.138	823.528	862.011	811.36	741.473	801.193	813.284	768.923	947.108	691.208	650.259	804.182	775.856	805.256	842.769	776.417	807.239	858.015
A0A0H2ZW38	1045.31	700.752	867.818	649.626	770.598	780.248	754.042	737.36	695.451	761.977	692.814	819.587	774.094	744.645	765.854	711.115	707.381	1193.98	873.029	758.722	775.423	745.701	728.714	756.2	759.37	738.484	950.681
A0A0H2ZW40	881.034	907.696	864.056	785.307	756.182	791.967	798.145	795.813	807.338	838.742	854.459	792.373	659.29	671.171	720.938	701.407	698.206	866.372	894.365	824.682	774.075	796.979	823.04	823.416	665.231	711.172	782.289
A0A0H2ZW41	1771.02	378.717	496.22	455.492	711.56	486.624	750.529	441.607	1117.23	517.873	708.689	499.916	655.114	769.078	508.36	840.121	439.87	2549.92	1074.87	475.856	599.092	596.068	817.553	604.302	712.096	674.24	1494.89
A0A0H2ZW42	795.958	684.166	819.972	722.072	816.453	809.035	855.643	784.085	817.937	846.767	808.215	760.335	684.486	859.523	698.485	779.115	732.017	817.537	740.062	771.022	812.744	819.864	832.352	784.275	772.004	738.8	774.777
A0A0H2ZW43	1722.76	1479.8	1149.11	1120.06	656.775	690.265	467.054	863.285	699.935	789.665	733.135	806.051	586.555	564.176	584.602	526.397	625.366	445.433	1601.28	1134.58	673.52	665.169	744.8	769.593	575.366	555.5	535.4
A0A0H2ZW45	3695.57	396.835	405.795	421.031	176.639	486.533	637.909	552.185	317.297	457.806	527.479	417.998	419.888	498.053	899.258	818.715	376.911	2954.07	2046.2	413.413	331.586	595.047	387.551	472.738	458.97	858.986	1665.49
A0A0H2ZW48	751.522	611.119	635.88	643.034	944.343	807.172	963.491	736.534	822.948	813.418	845.863	801.703	671.502	772.648	704.718	733.964	671.324	1164.59	681.32	639.457	875.757	850.012	818.183	823.783	722.075	719.341	917.958
A0A0H2ZW51	1386.94	1861.66	1756.53	1391.71	427.936	458.627	829.687	728.483	728.156	836.919	691.458	666.137	481.522	552.929	604.803	425.576	469.322	416.456	1624.3	1574.12	443.281	779.085	782.537	678.797	517.225	515.189	442.889
A0A0H2ZW52	5957.03	4749.83	326.473	490.593	63.0563	320.794	253.581	374.386	192.37	298.334	178.907	301.217	482.369	511.966	280.106	340.351	107.864	120.374	5353.43	408.533	191.925	313.983	245.352	240.062	497.167	310.229	114.119
A0A0H2ZW55	676.912	630.802	641.171	551.58	903.598	807.505	710.076	924.627	771.028	769.696	836.856	757.207	780.37	776.654	795.187	875.714	813.313	943.326	653.857	596.375	855.551	817.352	770.362	797.031	778.512	835.45	878.319
A0A0H2ZW61	403.938	678.202	921.335	660.476	825.622	931.158	801.516	834.976	720.106	971.961	810.202	976.512	771.625	817.628	896.25	723.835	806.009	527.545	541.07	790.905	878.39	818.246	846.033	893.357	794.626	810.042	666.777
A0A0H2ZW66	1035.06	1143.3	618.465	868.677	513.575	826.09	505.068	1027.04	632.763	736.838	966.477	791.662	846.668	755.674	913.181	818.679	853.673	149.581	1089.18	743.571	669.832	766.054	684.801	879.069	801.171	865.93	501.627
A0A0H2ZW68	1177.15	1261.18	1201.89	1024.26	858.161	969.776	476.524	585.575	522.218	549.649	526.282	526.508	803.148	749.392	851.509	739.354	737.476	708.645	1219.17	1113.07	913.969	531.049	535.933	526.395	776.27	795.432	723.061
A0A0H2ZW69	694.94	680.131	510.551	1109.45	671.305	648.499	372.125	702.095	552.175	572.221	735.345	556.307	1068.11	900.866	875.752	1128.94	1271.62	580.198	687.535	810.003	659.902	537.11	562.198	645.826	984.488	1002.35	925.911
A0A0H2ZW70	1204.78	869.312	843.323	511.793	357.726	268.367	915.223	793.659	940.503	918.319	904.266	891.144	727.719	810.048	661.568	809.727	525.756	1175.77	1037.05	677.558	313.046	854.441	929.411	897.705	768.884	735.647	850.762
A0A0H2ZW72	559.398	782.143	655.548	626.065	773.85	823.92	627.193	740.173	714.883	604.271	760.501	764.527	903.839	956.943	896.166	1109.13	972.43	491.6	670.77	640.807	798.885	683.683	659.577	762.514	930.391	1002.65	732.015
A0A0H2ZW73	642.441	695.096	890.18	835.42	767.001	791.259	787.553	739.905	754.733	795.248	743.385	801.826	806.851	794.373	806.481	738.735	793.066	893.751	668.768	862.8	779.13	763.729	774.99	772.605	800.612	772.608	843.409
A0A0H2ZW75	679.431	742.907	831.926	873.737	937.441	945.582	680.758	790.875	768.363	828.531	783.052	787.435	730.92	769.036	792.011	721.344	784.139	660.128	711.169	852.831	941.511	735.817	798.447	785.244	749.978	756.678	722.133
A0A0H2ZW76	1030.91	1263.98	1173.01	1086.55	1116.08	1055.62	594.134	695.024	684.162	695.037	578.034	662.732	580.114	661.639	643.384	550.206	776.903	566.211	1147.45	1129.78	1085.85	644.579	689.6	620.383	620.876	596.795	671.557
A0A0H2ZW77	1002.18	1055.94	1194.32	986.033	742.725	530.079	700.36	733.37	740.482	828.893	731.293	876.739	706.963	614.998	691.314	833.955	631.339	649.104	1029.06	1090.18	636.402	716.865	784.688	804.016	660.981	762.634	640.222
A0A0H2ZW78	769.765	685.394	891.931	715.247	822.052	770.496	757.77	714.248	759.434	677.99	736.071	659.218	747.939	743.842	760.051	781.716	779.015	1308.98	727.579	803.589	796.274	736.009	718.712	697.644	745.891	770.883	1044
A0A0H2ZW79	1101.18	1355.06	825.811	1033.26	721.121	735.378	583.686	874.677	598.054	577.623	1069.39	594.151	663.826	757.965	672.789	955.21	755.178	165.006	1228.12	929.538	728.249	729.182	587.839	831.768	710.896	814	460.092
A0A0H2ZW80	1237.54	1450.78	2280.63	1615.42	561.833	610.737	430.914	764.385	541.26	803.383	590.764	671.153	592.627	597.268	571.217	515.55	599.154	245.508	1344.16	1948.03	586.285	597.649	672.321	630.959	594.947	543.383	422.331
A0A0H2ZW82	469.974	575.18	592.448	600.993	778.77	833.681	798.184	816.207	831.111	846.052	836.373	860.787	827.765	908.748	877.904	853.397	860.299	724.992	522.577	596.72	806.225	807.196	838.581	848.58	868.256	865.651	792.645
A0A0H2ZW84	619.223	810.332	641.153	596.014	902.105	1112.94	870.406	1076.19	922.056	935.148	865.778	855.005	764.534	702.016	759.945	665.019	621.377	446.461	714.777	618.584	1007.52	973.3	928.602	860.392	733.275	712.482	533.919
A0A0H2ZW85	1096.96	696.92	451.877	761.012	718.802	503.373	641.562	555.378	692.859	408.126	984.708	446.395	893.341	931.294	689.399	1672.65	736.352	651.059	896.938	606.445	611.087	598.47	550.493	715.552	912.318	1181.03	693.705
A0A0H2ZW86	808.8	1215.16	879.253	962.892	652.417	577.102	552.36	668.512	610.377	587.239	559.333	569.439	1061.01	927.444	855.888	763.778	968.65	774.257	1011.98	921.072	614.759	610.436	598.808	564.386	994.228	809.833	871.453
A0A0H2ZW89	805.749	778.834	852.051	825.45	829.927	817.89	892.368	840.325	851.5	847.692	860.649	816.131	658.369	669.995	665.083	714.625	636.906	831.297	792.292	838.751	823.908	866.347	849.596	838.39	664.182	689.854	734.102
A0A0H2ZW90	759.666	600.396	784.741	605.474	900.196	754.881	940.328	689.007	936.32	764.38	895.334	740.762	583.637	784.496	621.344	771.286	626.553	1341.71	680.031	695.107	827.538	814.667	850.35	818.048	684.067	696.315	984.129
A0A0H2ZW91	654.392	370.568	682.416	502.316	1548.19	914.384	870.053	874.715	816.367	853.121	817.146	762.742	576.125	684.832	614.901	818.944	503.993	1286.21	512.48	592.366	1231.28	872.384	834.744	789.944	630.479	716.923	895.104
A0A0H2ZW93	761.292	675.224	715.152	635.583	885	865.084	872.992	794.089	884.052	966.414	817.542	922.654	656.703	694.517	694.61	704.612	724.309	886.924	718.258	675.368	875.042	833.541	925.233	870.098	675.61	699.611	805.616
A0A0H2ZW94	638.855	580.987	831.025	849.733	671.424	753.594	601.42	736.836	674.686	798.513	727.174	853.187	958.24	774.569	903.187	865.9	905.479	819.09	609.921	840.379	712.509	669.128	736.599	790.181	866.404	884.544	862.285
A0A0H2ZW96	201.069	229.089	296.082	622.075	282.413	342.486	569.318	544.457	602.205	632.628	428.369	460.676	1450.42	1779.28	1454.6	1035.37	1325.77	1006.87	215.079	459.078	312.45	556.887	617.417	444.523	1614.85	1244.99	1166.32
A0A0H2ZW97	1298	1455.32	1134.92	1210.33	641.546	653.611	496.087	634.662	568.112	679.499	535.692	731.238	857.956	740.887	848.454	498.586	753.354	621.919	1376.66	1172.63	647.579	565.375	623.805	633.465	799.422	673.52	687.637
A0A0H2ZW98	810.977	707.382	505.88	737.463	776.865	802.154	592.47	790.095	655.76	648.454	926.512	763.99	886.677	941.23	829.106	961.38	873.429	606.46	759.18	621.672	789.509	691.283	652.107	845.251	913.954	895.243	739.944
A0A0H2ZW99	356.862	595.829	559.372	764.111	662.195	674.998	702.801	651.731	678.552	764.462	669.361	688.052	1093.98	827.074	1001.96	654.998	1064	1457.89	476.345	661.741	668.597	677.266	721.507	678.706	960.527	828.477	1260.94
A0A0H2ZWA0	695.97	723.035	762.871	1198.53	289.881	179.378	597.537	818.245	953.807	1053.04	753.444	1396.95	1338.32	663.993	846.806	518.365	626.346	659.455	709.502	980.701	234.63	707.891	1003.42	1075.2	1001.15	682.585	642.9
A0A0H2ZWA1	1661.17	1488.99	1366.89	1026.64	758.925	817.655	876.06	955.666	835.481	974.523	828.08	964.321	328.238	435.554	360.181	413.22	368.387	316.478	1575.08	1196.76	788.29	915.863	905.002	896.2	381.896	386.701	342.433
A0A0H2ZWA3	676.41	876.489	637.723	877.408	726.617	736.478	588.126	686.966	631.4	549.743	643.471	653.423	894.463	955.848	915.858	1022.48	1150.18	565.824	776.45	757.565	731.547	637.546	590.571	648.447	925.155	969.169	858.004
A0A0H2ZWA6	533.071	561.731	348.432	528.35	519.461	724.013	528.948	727.362	788.568	466.448	886.555	683.406	986.685	1054.07	1111.77	1292.49	1015.09	726.704	547.401	438.391	621.737	628.155	627.508	784.98	1020.38	1202.13	870.899
A0A0H2ZWA8	547.671	652.833	813.72	808.826	755.182	814.942	708.492	698.115	616.599	716.243	647.067	717.122	902.803	902.789	924.645	805.457	1003.98	905.535	600.252	811.273	785.062	703.304	666.421	682.095	902.796	865.051	954.758
A0A0H2ZWA9	988.182	809.429	865.491	789.623	884.194	935.776	784.133	843.36	858.841	910.032	791.896	887.557	672.711	547.434	637.478	582.922	605.985	929.914	898.805	827.557	909.985	813.747	884.437	839.726	610.072	610.2	767.949
A0A0H2ZWB0	1006	643.387	537.447	620.556	822.317	795.215	691.18	643.399	772.072	594.217	827.698	661.038	760.684	746.037	741.895	900.951	797.833	1390.62	824.695	579.001	808.766	667.289	683.144	744.368	753.361	821.423	1094.23
A0A0H2ZWB1	736.606	705.358	763.498	574.772	701.989	867.894	580.787	814.824	648.184	613.853	759.6	829.854	931.684	911.267	878.081	986.11	909.551	653.097	720.982	669.135	784.942	697.806	631.019	794.727	921.476	932.096	781.324
A0A0H2ZWB2	601.655	558.338	576.134	531.473	739.931	627.074	777.711	655.247	773.226	692.628	756.465	655.042	905.87	850.32	893.844	869.07	863.136	1536.73	579.997	553.804	683.503	716.479	732.927	705.754	878.095	881.457	1199.93
A0A0H2ZWB4	591.875	726.437	991.179	744.68	874.975	976.967	612.297	772.906	661.888	718.986	600.554	783.473	873.929	784.666	833.808	770.79	942.725	804.242	659.156	867.929	925.971	692.601	690.437	692.014	829.297	802.299	873.484
A0A0H2ZWB5	751.995	693.028	609.599	616.866	847.995	844.369	974.663	869.417	899.931	932.521	871.782	917.297	712.202	681.392	678.283	666.047	647.684	941.772	722.512	613.232	846.182	922.04	916.226	894.54	696.797	672.165	794.728
A0A0H2ZWB6	546.488	445.296	310.098	411.995	393.963	525.297	587.287	431.981	784.957	443.721	534.457	475.772	1344.25	1310.28	1170.16	1339.21	1048.26	1256.22	495.892	361.046	459.63	509.634	614.339	505.115	1327.26	1254.69	1152.24
A0A0H2ZWB7	526.021	642.663	786.965	755.729	870.489	793.869	835.197	777.383	749.504	793.426	710.428	846.419	835.41	660.064	859.701	688.792	793.068	1171.68	584.342	771.347	832.179	806.29	771.465	778.423	747.737	774.247	982.374
A0A0H2ZWB8	1306.6	1204.88	1504.9	1343.09	718.414	620.177	617.091	534.296	622.461	617.928	486.509	487.926	679.448	646.944	712.568	607.715	638.826	1100.78	1255.74	1423.99	669.295	575.694	620.194	487.218	663.196	660.142	869.804
A0A0H2ZWB9	843.286	891.114	878.6	962.359	967.62	951.956	819.19	790.309	819.242	855.554	808.65	858.656	626.836	640.614	655.901	659.261	655.905	579.481	867.2	920.48	959.788	804.75	837.398	833.653	633.725	657.581	617.693
A0A0H2ZWC1	630.119	634.668	615.603	669.749	849.186	1054.94	904.589	647.951	603.323	770.51	789.932	1018.09	840.378	724.094	753.614	751.363	935.138	832.536	632.393	642.676	952.062	776.27	686.916	904.013	782.236	752.488	883.837
A0A0H2ZWC2	725.196	784.743	641.151	815.927	899.247	845.687	780.628	658.366	776.129	795.365	786.749	581.488	732.499	702.449	818.144	791.813	801.58	1109.11	754.969	728.539	872.467	719.497	785.747	684.118	717.474	804.978	955.343
A0A0H2ZWC4	968.338	774.415	1162.64	838.852	822.563	763.376	832.494	640.514	805.505	663.99	700.733	704.073	629.36	615.726	670.715	702.064	582.82	1414.83	871.377	1000.75	792.97	736.504	734.748	702.403	622.543	686.39	998.827
A0A0H2ZWC5	663.712	1163.61	902.708	849.359	387.239	258.137	454.522	1020.4	779.551	414.156	737.754	682.072	1190.97	809.285	809.878	1268.17	928.88	397.435	913.66	876.033	322.688	737.462	596.854	709.913	1000.13	1039.02	663.158
A0A0H2ZWC6	547.641	579.732	641.719	638.658	859.883	787.021	855.447	754.993	867.32	843.882	724.349	881.342	852.667	760.663	758.254	830.777	825.504	976.681	563.686	640.188	823.452	805.22	855.601	802.846	806.665	794.516	901.092
A0A0H2ZWC8	797.48	1091.88	675.689	746.224	995.161	967.166	846.158	973.101	908.496	983.773	840.251	1083.23	637.382	519.301	633.643	476.783	684.952	487.547	944.682	710.957	981.164	909.63	946.135	961.738	578.342	555.213	586.25
A0A0H2ZWC9	607.314	644.117	706.597	674.284	750.167	887.158	879.075	748.515	835.811	799.62	855.384	764.412	739.493	780.761	802.336	793.467	773.759	975.418	625.716	690.44	818.663	813.795	817.716	809.898	760.127	797.902	874.589
A0A0H2ZWD1	347.785	938.549	1016.24	1087.61	736.345	657.888	825.074	815.988	598.702	635.764	569.261	679.118	946.615	882.971	738.151	963.455	1156.12	322.511	643.167	1051.92	697.116	820.531	617.233	624.19	914.793	850.803	739.315
A0A0H2ZWD3	800.522	586.231	775.381	597.775	808.521	715.073	806.095	669.393	875.441	733.514	798.005	737.17	773.721	673.585	684.593	817.334	687.798	1519.75	693.376	686.578	761.797	737.744	804.478	767.587	723.653	750.964	1103.77
A0A0H2ZWD4	3243.78	1691.61	1553.47	1288.61	388.432	453.803	587.007	694.019	505.038	741.96	432.154	583.834	360.862	498.994	334.903	586.166	280.306	719.747	2467.69	1421.04	421.118	640.513	623.499	507.994	429.928	460.535	500.026
A0A0H2ZWD6	1143.23	961.655	719.624	860.399	600.171	597.531	481.647	681.209	541.386	455.683	773.613	519.933	897.509	875.045	807.86	1083.69	973.128	866.478	1052.44	790.012	598.851	581.428	498.535	646.773	886.277	945.775	919.803
A0A0H2ZWD8	472.714	553.271	777.403	764.529	837.053	763.425	811.911	715.569	746.754	890.534	658.49	893.151	876.658	771.551	860.687	732.367	896.923	1004.61	512.992	770.966	800.239	763.74	818.644	775.821	824.104	796.527	950.769
A0A0H2ZWE0	734.837	827.612	676.632	633.526	883.353	936.46	795.949	804.073	853.983	904.284	885.311	762.656	665.454	754.586	716.166	787.859	758.906	697.914	781.225	655.079	909.907	800.011	879.133	823.983	710.02	752.013	728.41
A0A0H2ZWE1	657.395	825.473	702.18	653.713	985.123	850.308	981.768	764.899	852.654	715.742	864.405	702.634	643.768	792.765	644.433	810.256	683.965	945.816	741.434	677.947	917.716	873.333	784.198	783.519	718.267	727.344	814.891
A0A0H2ZWE2	553.703	717.291	670.977	940.557	716.111	804.499	455.542	801.056	669.415	668.319	638.988	831.299	1113.77	911.451	1012.05	882.979	996.777	445.841	635.497	805.767	760.305	628.299	668.867	735.143	1012.61	947.515	721.309
A0A0H2ZWE3	690.932	723.559	659.495	644.211	917.636	850.266	853.563	722.392	827.912	797.369	828.108	771.768	711.511	751.747	739.624	757.31	747.157	1070.53	707.245	651.853	883.951	787.978	812.64	799.938	731.629	748.467	908.844
A0A0H2ZWE5	1097.18	975.248	788.937	626.628	967.177	1085.61	596.428	711.063	667.731	781.276	580.686	732.399	828.207	805.659	748.468	710.363	784.84	701.122	1036.22	707.783	1026.4	653.745	724.504	656.543	816.933	729.416	742.981
A0A0H2ZWE6	776.943	764.454	734.265	760.1	668.782	759.035	632.218	808.321	703.601	680.83	710.244	834.19	1032.92	781.299	978.12	893.971	702.232	743.982	770.698	747.183	713.908	720.269	692.215	772.217	907.111	936.045	723.107
A0A0H2ZWE7	636.898	709.855	652.247	1148.39	309.705	406.072	555.889	690.411	950.07	809.609	823.701	716.305	1257.69	931.74	620.152	565.876	971.766	1117.71	673.377	900.32	357.888	623.15	879.84	770.003	1094.71	593.014	1044.74
A0A0H2ZWE8	1285.41	912.215	951.533	953.816	698.958	573.232	811.787	647.5	805.781	668.222	730.131	597.132	637.308	682.221	633.961	748.7	604.665	1301.91	1098.81	952.674	636.095	729.644	737.001	663.632	659.765	691.33	953.289
A0A0H2ZWF1	845.005	643.721	773.488	695.681	888.773	785.295	959.424	744.417	786.512	816.831	862.587	920.634	625.984	729.54	678.77	749.021	638.841	1009.15	744.363	734.585	837.034	851.921	801.671	891.61	677.762	713.895	823.994
A0A0H2ZWF2	778.597	651.505	718.347	597.909	795.91	762.789	947.676	839.181	816.91	804.437	845.441	817.445	656.14	715.995	757.885	801.653	699.794	1085.84	715.051	658.128	779.35	893.428	810.673	831.443	686.068	779.769	892.816
A0A0H2ZWF3	803.595	696.776	748.69	818.398	1002.32	718.419	872.723	736.051	791.122	793.553	868.252	718.739	610.489	761.172	627.961	954.228	710.408	807.736	750.186	783.544	860.372	804.387	792.338	793.495	685.831	791.095	759.072
A0A0H2ZWF6	537.381	929.744	651.997	834.273	1222.48	1223.88	1617.42	1092.27	1445.07	1142.13	941.641	1378.95	257.797	291.019	290.609	304.65	231.92	283.145	733.562	743.135	1223.18	1354.85	1293.6	1160.3	274.408	297.629	257.533
A0A0H2ZWF7	854.012	724.585	1029.21	934.277	768.69	610.191	905.976	759.848	809.555	843.155	875.637	754.756	603.119	975.798	617.335	787.894	637.108	635.56	789.299	981.742	689.441	832.912	826.355	815.196	789.458	702.615	636.334
A0A0H2ZWF8	723.478	560.596	1018.78	1218.05	669.691	514.472	948.342	1019.53	908.444	1123.62	913.272	812.023	673.719	838.896	592.716	720.508	615.166	305.653	642.037	1118.42	592.081	983.936	1016.03	862.647	756.308	656.612	460.409
A0A0H2ZWG4	780.241	670.44	641.624	812.983	729.052	765.601	738.123	789.868	813.617	857.771	852.25	784.905	742.136	871.4	831.713	861.318	808.586	615.276	725.341	727.303	747.327	763.995	835.694	818.577	806.768	846.516	711.931
A0A0H2ZWG6	797.203	694.726	797.863	930.65	710.697	621.268	619.714	633.668	728.278	522.823	760.461	672.703	873.058	974.747	744.032	1057.53	910.503	771.012	745.965	864.256	665.983	626.691	625.551	716.582	923.903	900.782	840.758
A0A0H2ZWG7	569.495	546.753	559.056	611.889	1042.32	952.742	818.442	755.903	894.351	892.099	867.943	894.353	722.316	858.226	704.118	697.432	753.164	887.09	558.124	585.473	997.531	787.172	893.225	881.148	790.271	700.775	820.127
A0A0H2ZWG8	1927.72	3373.92	4547.01	2635.05	264.649	79.8365	428.287	253.58	327.67	255.928	180.387	127.274	160.034	351.745	183.612	288.502	155.347	80.4794	2650.82	3591.03	172.243	340.934	291.799	153.831	255.889	236.057	117.913
A0A0H2ZWG9	316.37	807.683	511.277	787.127	620.79	988.774	473.991	735.338	458.355	676.725	546.838	1040.22	1320.98	1064.87	1129.11	642.788	1314.32	336.794	562.026	649.202	804.782	604.665	567.54	793.531	1192.92	885.949	825.555
A0A0H2ZWH0	900.14	1068.83	828.04	836.588	918.519	968.05	815.301	851.974	726.319	931.032	820.947	773.54	617.026	617.192	727.565	629.878	706.23	551.956	984.485	832.314	943.285	833.637	828.675	797.243	617.109	678.721	629.093
A0A0H2ZWH3	833.007	820.205	884.565	904.278	1063.81	963.272	948.632	890.012	906.268	964.453	907.958	960.369	515.357	548.827	536.391	563.054	522.562	644.685	826.606	894.422	1013.54	919.322	935.361	934.164	532.092	549.722	583.623
A0A0H2ZWH4	357.933	721.447	527.554	815.901	771.569	1009.8	395.677	853.469	460.52	546.124	498.467	714.578	1231.81	1020.79	1150.8	981.044	1326.02	280.007	539.69	671.728	890.686	624.573	503.322	606.522	1126.3	1065.92	803.013
A0A0H2ZWH6	919.939	961.351	437.907	743.056	568.83	797.868	491.674	851.133	633.258	648.883	888.709	750.738	1045.99	858.934	801.308	999.537	1009.71	375.585	940.645	590.482	683.349	671.404	641.071	819.723	952.462	900.422	692.648
A0A0H2ZWH8	615.499	628.792	706.286	723.791	920.195	724.838	702.288	746.812	721.048	779.506	706.635	758.651	754.183	1106.15	832.168	929.124	975.364	537.245	622.145	715.038	822.517	724.55	750.277	732.643	930.169	880.646	756.304
A0A0H2ZWH9	832.388	956.825	1290.17	1380.5	646.798	724.584	545.454	759.676	580.188	602.361	692.257	718.995	748.529	667.718	811.908	740.486	915.873	565.522	894.606	1335.34	685.691	652.565	591.274	705.626	708.124	776.197	740.697
A0A0H2ZWI1	618.268	692.574	670.282	602.006	810.15	751.506	883.197	788.885	839.484	937.627	849.008	898.989	746.231	738.053	766.076	705.181	768.126	1009.56	655.421	636.144	780.828	836.041	888.556	873.998	742.142	735.628	888.844
A0A0H2ZWI2	1172.58	1029.12	1035.61	947.329	621.693	674.426	772.503	738.535	766.752	810.372	753.914	757.272	737.233	645.019	742.867	684.898	536.983	872.671	1100.85	991.472	648.059	755.519	788.562	755.593	691.126	713.882	704.827
A0A0H2ZWI3	620.674	559.507	547.856	616.579	809.595	781.859	732.458	714.436	702.859	770.092	690.468	802.939	947.586	898.999	870.472	848.656	955.252	1009.4	590.091	582.217	795.727	723.447	736.476	746.704	923.292	859.564	982.327
A0A0H2ZWI4	647.871	580.908	705.315	601.844	808.118	827.692	754.522	762.418	793.049	990.018	799.286	967.163	806.234	641.009	804.21	665.396	819.566	1124.9	614.389	653.58	817.905	758.47	891.533	883.224	723.621	734.803	972.23
A0A0H2ZWI5	712.361	569.422	673.543	661.311	544.757	793.786	602.742	747.561	629.102	709.083	764.31	873.212	1067.89	736.401	954.707	838.113	909.301	1111.6	640.892	667.427	669.272	675.151	669.092	818.761	902.147	896.41	1010.45
A0A0H2ZWI6	1567.72	1558.27	1878.83	1764.98	444.995	564.24	825.689	814.917	845.331	893.156	622.242	725.222	397.581	426.787	466.126	378.755	415.503	257.535	1563	1821.9	504.618	820.303	869.243	673.732	412.184	422.44	336.519
A0A0H2ZWI7	945.936	1015.58	595.009	735.759	669.814	822.454	435.015	867.049	704.746	498.799	711.499	825.099	914.329	864.079	795.166	973.175	1096.81	386.542	980.758	665.384	746.134	651.032	601.773	768.299	889.204	884.171	741.674
A0A0H2ZWI8	700.699	967.9	648.552	824.376	904.079	975.027	823.814	902.942	878.063	906.423	886.156	965.904	686.874	598.325	679.858	531.026	754.749	595.259	834.299	736.464	939.553	863.378	892.243	926.03	642.6	605.442	675.004
A0A0H2ZWI9	515.632	520.162	617.047	441.07	826.985	892.05	928.504	806.528	778.433	1134.43	686.222	1160.46	875.782	671.225	857.933	588.373	843.089	989.987	517.897	529.058	859.517	867.516	956.431	923.341	773.503	723.153	916.538
A0A0H2ZWJ0	597.297	866.72	773.64	651.124	1023.03	898.551	748.087	791.776	778.653	822.074	802.01	812.258	715.749	729.976	784.022	647.928	758.448	937.826	732.008	712.382	960.79	769.932	800.363	807.134	722.862	715.975	848.137
A0A0H2ZWJ1	602.165	669.307	577.521	649.164	945.861	788.917	870.973	706.177	798.379	816.279	785.423	636.076	681.039	918.42	773.779	815.987	901.294	1020.31	635.736	613.343	867.389	788.575	807.329	710.749	799.729	794.883	960.803
A0A0H2ZWJ3	1237.14	847.692	1002.24	686.984	490.638	428.283	878.581	951.474	815.682	731.697	800.104	800.097	749.119	949.915	556.592	1127.59	601.418	377.243	1042.42	844.612	459.46	915.027	773.69	800.101	849.517	842.089	489.331
A0A0H2ZWJ4	1499.11	1148.92	555.937	634	457.394	461.256	483.648	808.458	691.606	640.709	1110.86	552.633	819.924	917.907	691.336	1447.57	642.294	179.19	1324.02	594.968	459.325	646.053	666.158	831.745	868.916	1069.45	410.742
A0A0H2ZWJ6	705.689	708.603	815.406	717.58	789.623	760.691	766.354	722.199	749.405	744.639	695.003	794.39	837.732	795.416	797.819	849.746	827.071	941.172	707.146	766.493	775.157	744.277	747.022	744.697	816.574	823.783	884.121
A0A0H2ZWJ7	741.559	1225.31	1052.66	1707.75	206.892	209.937	641.944	852.31	688.464	529.243	872.55	570.492	1091.81	807.576	1115.14	912.08	542.849	195.454	983.436	1380.21	208.414	747.127	608.854	721.521	949.692	1013.61	369.151
A0A0H2ZWJ8	757.487	692.615	758.451	643.008	814.888	787.372	844.812	818.582	871.44	909.149	842.305	875.802	726.159	698.575	709.344	648.612	679.729	1081.14	725.051	700.73	801.13	831.697	890.294	859.054	712.367	678.978	880.437
A0A0H2ZWK0	406.559	561.222	480.229	691.974	708.138	796.718	625.656	770.814	816.775	940.536	752.24	839.599	949.975	882.655	970.8	839.383	1066.06	712.56	483.89	586.102	752.428	698.235	878.656	795.919	916.315	905.092	889.31
A0A0H2ZWK1	1669.54	2180.35	3724.54	2947.95	152.757	125.823	1030.68	620.066	440.338	619.964	272.708	257.369	233.282	268.861	332.694	266.459	147.969	158.92	1924.94	3336.24	139.29	825.371	530.151	265.039	251.071	299.577	153.445
A0A0H2ZWK2	852.107	819.005	825.382	813.756	883.538	858.936	839.313	829.842	879.583	857.751	849.5	812.511	616	642.989	654.813	654.386	655.399	887.409	835.556	819.569	871.237	834.578	868.667	831.005	629.495	654.599	771.404
A0A0H2ZWK3	737.656	829.227	609.562	756.788	689.276	828.753	594.947	823.175	700.899	599.623	727.817	755.952	1013.79	923.726	867.485	931.235	928.888	534.086	783.441	683.175	759.015	709.061	650.261	741.884	968.756	899.36	731.487
A0A0H2ZWK4	1028.44	1128.57	723.258	1069.34	666.993	833.292	497.867	662.976	568.548	547.088	683.318	608.057	888.537	769.685	909.645	829.142	975.631	615.691	1078.51	896.297	750.143	580.422	557.818	645.688	829.111	869.394	795.661
A0A0H2ZWK5	805.922	938.208	1007.31	1147.63	823.102	846.714	577.849	692.045	674.287	638.141	680.353	677.016	814.883	799.626	800.91	673.381	837.492	702.098	872.065	1077.47	834.908	634.947	656.214	678.685	807.255	737.145	769.795
A0A0H2ZWK6	931.445	1003.76	1144.55	1260.98	779.531	733.845	542.651	773.9	651.598	544.044	860.085	626.293	591.552	778.496	704.224	830.122	854.267	503.181	967.6	1202.76	756.688	658.275	597.821	743.189	685.024	767.173	678.724
A0A0H2ZWL1	1045.7	666.468	940.754	776.708	503.061	500.825	1045.34	776.762	991.093	777.652	991.285	785.094	538.373	927.236	596.789	749.531	470.889	1069.3	856.083	858.731	501.943	911.05	884.372	888.19	732.805	673.16	770.093
A0A0H2ZWL2	608.875	489.608	611.91	613.698	718.302	741.314	747.117	677.617	650.542	681.1	714.513	763.337	1028.1	706.15	986.163	644.734	822.49	1778.28	549.242	612.804	729.808	712.367	665.821	738.925	867.123	815.448	1300.39
A0A0H2ZWL5	815.885	622.233	699.102	696.09	972.733	741.622	1005.78	669.711	887.674	727.366	876.156	689.649	598.439	638.247	622.711	769.613	583.054	1524.99	719.059	697.596	857.178	837.745	807.52	782.903	618.343	696.162	1054.02
A0A0H2ZWL6	786.301	602.977	674.166	574.781	706.961	800.835	861.692	734.388	740.321	826.13	771.33	729.292	776.975	878.375	853.128	812.078	800.255	1071.08	694.639	624.474	753.898	798.04	783.225	750.311	827.675	832.603	935.668
A0A0H2ZWL7	445.598	546.114	604.331	585.227	819.519	943.904	828.402	791.703	747.506	849.588	834.842	823.729	816.85	906.634	916.034	741.431	866.273	876.116	495.856	594.779	881.712	810.053	798.547	829.286	861.742	828.733	871.194
A0A0H2ZWL9	778.764	761.247	759.251	728.021	875.925	856.041	863.788	904.687	861.625	1064.12	868.415	987.091	702.236	706.943	677.579	639.705	633.933	546.76	770.005	743.636	865.983	884.238	962.874	927.753	704.59	658.642	590.346
A0A0H2ZWM0	615.586	672.086	617.705	581.311	818.036	793.547	786.503	725.327	831.849	837.33	805.988	776.912	808.536	823.389	815.792	751.34	817.853	1110.24	643.836	599.508	805.791	755.915	834.59	791.45	815.962	783.566	964.047
A0A0H2ZWM1	965.655	831.603	719.986	717.739	1034.71	866.057	928.461	803.2	749.942	570.653	1034.06	723.297	511.348	1012.53	514.456	1056.09	608.434	333.42	898.629	718.863	950.383	865.83	660.297	878.68	761.937	785.273	470.927
A0A0H2ZWM2	353.801	172.463	758.406	221.029	530.828	123.07	562.886	652.267	498.197	332.361	690.759	443.994	1157.19	1687.68	918.834	2219.57	1288.31	329.257	263.132	489.718	326.949	607.577	415.279	567.376	1422.43	1569.2	808.782
A0A0H2ZWM6	1529.83	1324.53	2292.62	2305.92	349.751	348.711	742.03	484.473	617.615	544.145	615.176	452.306	507.059	514.346	547.445	509.021	326.816	740.546	1427.18	2299.27	349.231	613.251	580.88	533.741	510.702	528.233	533.681
A0A0H2ZWM7	624.494	835.093	1516.19	1002.4	647.408	812.069	591.715	675.522	565.963	784.078	564.692	716.147	767.73	765.687	955.607	634.001	874.405	913.857	729.794	1259.29	729.738	633.619	675.02	640.419	766.709	794.804	894.131
A0A0H2ZWM8	793.288	1006.63	509.161	489.903	1099.04	1101.08	765.017	901.411	971.74	1006.34	985.985	942.37	622.134	636.608	574.547	572.246	643.089	603.873	899.957	499.532	1100.06	833.214	989.038	964.177	629.371	573.396	623.481
A0A0H2ZWM9	588.045	494.308	772.602	689.937	1255.83	934.982	885.311	767.982	817.634	844.682	772.613	815.052	635.366	847.946	693.937	645.045	630.237	1066.84	541.177	731.269	1095.41	826.647	831.158	793.833	741.656	669.491	848.537
A0A0H2ZWN0	364.908	419.731	585.693	482.715	825.753	799.037	961.804	909.379	947.017	1102.31	926.687	942.726	781.431	812.676	837.963	837.679	668.519	758.642	392.319	534.204	812.395	935.592	1024.66	934.707	797.054	837.821	713.58
A0A0H2ZWN1	1017.76	479.647	902.615	874.669	948.421	660.859	758.937	632.265	828.648	850.164	643.589	980.834	636.325	573.51	790.636	594.151	603.803	1516.66	748.701	888.642	804.64	695.601	839.406	812.211	604.918	692.393	1060.23
A0A0H2ZWN2	357.322	753.395	490.242	844.525	664.999	706.678	590.634	768.336	531.428	724.346	672.083	1002.09	1030.17	735.466	1246.53	757.93	1164.99	797.212	555.358	667.383	685.838	679.485	627.887	837.088	882.818	1002.23	981.102
A0A0H2ZWN3	818.582	608.003	911.154	759.386	713.015	828.107	755.213	763.355	734.389	716.878	610.989	749.308	792.87	985.393	808.973	850.129	881.517	728.845	713.293	835.27	770.561	759.284	725.634	680.149	889.132	829.551	805.181
A0A0H2ZWN5	710.516	885.884	532.668	377.949	478.362	429.336	977.897	1123.72	972.94	974.959	929.048	1002.52	706.32	786.892	776.055	704.226	821.871	847.45	798.2	455.309	453.849	1050.81	973.949	965.784	746.606	740.141	834.66
A0A0H2ZWN6	929.742	895.667	998.277	922.301	793.558	763.153	910.468	828.009	828.575	900.462	806.436	838.347	612.349	602.493	641.278	640.386	603.12	806.604	912.705	960.289	778.356	869.238	864.518	822.392	607.421	640.832	704.862
A0A0H2ZWN7	620.543	729.631	408.782	570.894	800.841	712.004	895.518	904.966	933.68	923.266	900.69	920.569	865.119	873.613	758.162	863.866	699.194	544.92	675.087	489.838	756.422	900.242	928.473	910.629	869.366	811.014	622.057
A0A0H2ZWN8	1493.16	725.361	794.504	773.251	829.339	759.475	819.406	954.004	1243.07	949.048	1119.54	763.961	315.772	676.411	298.29	663.612	282.529	901.883	1109.26	783.878	794.407	886.705	1096.06	941.75	496.091	480.951	592.206
A0A0H2ZWN9	902.224	868.725	1331.18	1215.02	602.107	598.891	1238.32	1043.42	1097.17	1046.29	642.991	672.682	471.514	658.753	508.24	636.247	489.684	463.529	885.475	1273.1	600.499	1140.87	1071.73	657.837	565.134	572.244	476.607
A0A0H2ZWP0	752.386	753.356	850.739	661.912	760.544	696.21	769.496	661.291	729.123	695.094	760.984	722.483	854.575	657.303	816.842	721.269	707.027	1528.69	752.871	756.325	728.377	715.393	712.109	741.733	755.939	769.056	1117.86
A0A0H2ZWP1	531.131	686.811	1194.42	1411.56	721.807	600.426	386.358	697.21	587.464	463.665	592.338	632.916	956.538	692.451	924.474	953.347	1053.15	841.361	608.971	1302.99	661.117	541.784	525.564	612.627	824.495	938.911	947.255
A0A0H2ZWP2	758.235	870.67	840.207	787.35	807.931	750.135	855.442	760.937	848.917	838.239	817.79	798.339	669.744	646.351	725.265	605.419	706.634	1125.77	814.452	813.779	779.033	808.19	843.578	808.064	658.047	665.342	916.2
A0A0H2ZWP4	708.027	910.899	796.938	921.634	779.189	770.14	741.641	733.372	756.458	801.535	746.353	772.345	775.088	726.114	822.299	748.274	846.145	730.184	809.463	859.286	774.665	737.506	778.997	759.349	750.601	785.287	788.164
A0A0H2ZWP5	574.316	738.325	859.506	739.897	803.697	772.155	738.978	669.799	598.221	662.304	654.886	655.105	914.406	893.823	950.152	843.182	865.567	1028.75	656.321	799.702	787.926	704.388	630.262	654.995	904.115	896.667	947.157
A0A0H2ZWP6	1069.02	549.954	929.45	923.517	2124.61	974.887	839.586	790.264	754.129	1645.02	610.702	1341.4	261.162	573.499	353.727	322.354	396.025	279.875	809.486	926.483	1549.75	814.925	1199.57	976.052	417.33	338.04	337.95
A0A0H2ZWP7	487.141	597.358	629.801	749.009	882.099	860.653	762.343	681.325	730.534	741.085	694.047	799.092	897.98	855.689	888.89	747.233	920.62	1023.24	542.249	689.405	871.376	721.834	735.809	746.569	876.835	818.062	971.929
A0A0H2ZWP8	708.712	772.683	734.02	830.448	731.981	776.022	722.941	806.096	760.625	841.791	789.143	729.724	803.833	804.484	802.92	740.722	882.429	793.577	740.697	782.234	754.001	764.519	801.208	759.433	804.158	771.821	838.003
A0A0H2ZWQ0	527.426	442.807	654.245	462.167	770.623	547.426	711.736	614.14	688.569	584.665	736.608	546.855	1212.78	686.898	711.831	1413.38	843.891	1476.95	485.117	558.206	659.024	662.938	636.617	641.731	949.841	1062.61	1160.42
A0A0H2ZWQ1	730.779	942.121	715.988	865.571	720.987	843.924	626.4	668.74	556.95	467.525	655.723	552.138	943.851	1134.35	917.907	1066.65	1035.21	329.568	836.45	790.779	782.455	647.57	512.237	603.93	1039.1	992.277	682.387
A0A0H2ZWQ2	841.027	658.149	791.159	645.239	856.114	746.356	868.455	685.075	823.348	740.018	739.579	689.132	713.498	651.49	710.195	705.818	703.685	1583.83	749.588	718.199	801.235	776.765	781.683	714.356	682.494	708.006	1143.76
A0A0H2ZWQ3	1348.15	1340.85	1158.86	1227.86	702.737	638.682	723.279	732.291	778.971	697.133	775.982	695.089	555.176	508.261	621.427	541.978	548.678	873.455	1344.5	1193.36	670.71	727.785	738.052	735.536	531.718	581.703	711.067
A0A0H2ZWQ4	1244.46	906.98	1192.62	735.521	615.962	675.309	793.395	614.816	713.534	678.164	713.642	767.653	676.559	1019.17	599.429	1036.25	639.753	481.118	1075.72	964.068	645.636	704.105	695.849	740.648	847.867	817.838	560.435
A0A0H2ZWQ6	885.103	831.507	881.235	762.066	993.827	897.025	752.546	808.046	894.234	846.157	783.856	891.545	605.412	822.669	588.126	763.98	693.078	477.887	858.305	821.65	945.426	780.296	870.196	837.701	714.04	676.053	585.483
A0A0H2ZWQ7	569.584	1121.94	792.905	1091.64	587.152	846.919	468.807	754.962	520.748	519.372	532.619	669.52	1055.96	795.678	1095.55	852.969	1216.29	402.005	845.76	942.275	717.035	611.885	520.06	601.069	925.821	974.261	809.145
A0A0H2ZWQ8	650.467	733.985	761.773	721.702	842.7	837.029	889.915	818.696	841.998	867.862	792.422	875.804	727.319	663.741	735.533	682.371	751.745	952.474	692.226	741.738	839.865	854.305	854.93	834.113	695.53	708.952	852.11
A0A0H2ZWQ9	595.038	353.078	649.74	346.065	645.21	612.718	1085.28	1267.18	1138.84	1606.83	1133.27	1400.5	573.527	648.483	685.818	536.053	468.526	510.562	474.058	497.902	628.964	1176.23	1372.83	1266.89	611.005	610.936	489.544
A0A0H2ZWR0	724.983	953.499	936.867	947.872	703.299	834.821	1418.54	868.877	732.384	881.725	893.845	870.808	554.657	658.372	573.526	680.918	597.303	485.827	839.241	942.37	769.06	1143.71	807.055	882.326	606.515	627.222	541.565
A0A0H2ZWR1	598.939	469.176	610.86	494.7	754.374	719.48	796.255	615.316	735.329	676.219	780.446	676.488	891.491	850.672	894.049	848.395	838.506	1627.46	534.058	552.78	736.927	705.785	705.774	728.467	871.081	871.222	1232.98
A0A0H2ZWR4	1119.39	931.611	1071.8	1026.47	723.286	734.69	755.277	792.847	944.549	957.726	900.587	945.871	564.63	618.991	555.305	643.138	512.554	551.792	1025.5	1049.14	728.988	774.062	951.138	923.229	591.81	599.221	532.173
A0A0H2ZWR5	620.46	705.488	661.456	649.644	880.293	853.3	915.293	888.274	956.713	927.419	968.836	955.202	669.977	677.097	657.377	649.821	638.445	867.387	662.974	655.55	866.796	901.783	942.066	962.019	673.537	653.599	752.916
A0A0H2ZWR6	525.566	684.224	934.385	993.201	574.567	598.438	641.687	667.855	668.67	732.086	603.564	772.975	1011.89	820.322	974.131	693.964	980.875	1109.4	604.895	963.793	586.503	654.771	700.378	688.269	916.104	834.048	1045.14
A0A0H2ZWR7	858.056	918.62	612.211	809.121	663.769	761.475	663.954	862.584	772.339	658.735	787.158	777.169	933.779	898.4	781.553	975.502	839.085	323.57	888.338	710.666	712.622	763.269	715.537	782.164	916.089	878.527	581.327
A0A0H2ZWR8	1364.54	1386.18	1429.85	1073.21	712.603	669.607	674.711	706.03	648.471	750.02	558.499	576.528	650.229	779.976	595.187	630.077	645.597	598.357	1375.36	1251.53	691.105	690.37	699.245	567.514	715.102	612.632	621.977
A0A0H2ZWS1	693.22	457.413	716.91	507.744	966.328	806.317	807.484	753.89	846.753	950.85	779.995	756.176	705.865	772.053	766.761	807.507	715.742	1244.58	575.316	612.327	886.322	780.687	898.801	768.086	738.959	787.134	980.162
A0A0H2ZWS2	816.123	1074.29	722.586	734.058	1117.4	1058.38	406.502	378.302	413.562	365.134	394.373	352.291	1084.96	918.393	984.919	791.126	1009.44	1333.84	945.207	728.322	1087.89	392.402	389.348	373.332	1001.68	888.023	1171.64
A0A0H2ZWS3	693.088	779.29	673.356	782.551	833.179	783.964	930.404	757.525	843.809	856.017	836.453	797.555	724.13	850.753	777.24	723.417	678.122	761.833	736.189	727.953	808.572	843.964	849.913	817.004	787.441	750.329	719.977
A0A0H2ZWS6	881.009	910.876	913.638	859.925	751.223	819.887	759.262	743.128	727.016	747.109	739.977	707.137	765.531	792.82	747.158	773.843	757.111	731.394	895.943	886.782	785.555	751.195	737.062	723.557	779.176	760.501	744.252
A0A0H2ZWS7	835.03	555.344	454.111	576.136	957.457	859.944	851.635	690.482	948.694	914.845	1156.07	613.221	592.896	998.864	509.859	1148.69	631.691	526.814	695.187	515.123	908.701	771.058	931.77	884.647	795.88	829.276	579.252
A0A0H2ZWS8	632.229	602.861	675.096	613.706	745.925	762.534	652.573	693.728	635.363	622.956	708.499	703.61	952.857	863.384	935.381	859.541	948.988	1265.39	617.545	644.401	754.229	673.15	629.16	706.054	908.121	897.461	1107.19
A0A0H2ZWT2	2344.86	2538.61	1874.12	1271.06	524.308	553.864	463.869	579.037	502.284	610.121	475.465	604.709	468.844	452.369	443.96	420.206	457.971	357.917	2441.73	1572.59	539.086	521.453	556.202	540.087	460.606	432.083	407.944
A0A0H2ZWT4	803.214	842.232	676.046	799.951	629.466	777.22	615.908	783.639	655.393	759.014	730.012	862.155	939.011	842.808	894.387	685.403	954.675	754.214	822.723	737.998	703.343	699.774	707.204	796.083	890.909	789.895	854.445
A0A0H2ZWT5	779.333	891.823	746.442	947.639	900.945	1507.54	480.738	680.801	492.998	575.472	472.324	494.093	989.4	846.08	989.345	741.261	1078.7	421.412	835.578	847.04	1204.24	580.769	534.235	483.209	917.74	865.303	750.054
A0A0H2ZWT6	849.93	839.641	1144.89	1051.95	838.756	755.066	781.706	766.376	843.859	850.647	694.984	827.191	602.748	678.899	684.712	695.318	692.648	683.17	844.785	1098.42	796.911	774.041	847.253	761.088	640.824	690.015	687.909
A0A0H2ZWT7	955.275	1037.96	1444.93	1232.88	593.655	704.991	711.125	743.647	634.281	923.114	678.388	782.429	705.044	545.944	772.792	497.801	682.305	802.247	996.617	1338.9	649.323	727.386	778.697	730.409	625.494	635.297	742.276
A0A0H2ZWU0	678.061	726.374	860.111	785.572	824.907	796.005	748.434	694.433	721.943	778.127	659.717	792.539	847.418	801.56	806.079	751.397	844.997	950.477	702.218	822.841	810.456	721.434	750.035	726.128	824.489	778.738	897.737
A0A0H2ZWU1	754.745	838.72	982.972	960.394	836.462	800.255	803.267	802.82	862.513	813.22	725.786	811.396	658.684	669.199	749.865	715.277	698.611	730.851	796.732	971.683	818.358	803.043	837.866	768.591	663.942	732.571	714.731
A0A0H2ZWU2	719.286	709.768	798.71	714.044	868.499	883.393	790.533	771.273	753.766	817.711	795.071	810.642	744.314	794.442	787.602	752.584	741.917	836.987	714.527	756.377	875.946	780.903	785.739	802.857	769.378	770.093	789.452
A0A0H2ZWU3	935.729	911.02	1038.05	863.685	731.776	700.676	802.126	814.474	778.052	830.179	756.898	810.701	669.857	705.568	691.049	710.518	696.787	789.467	923.374	950.87	716.226	808.3	804.115	783.8	687.713	700.783	743.127
A0A0H2ZWU5	447.47	912.588	932.633	1048.57	830.148	519.522	627.377	582.617	672.01	377.093	701.654	510.772	797.447	981.603	763.3	1105.5	1138.49	811.249	680.029	990.603	674.835	604.997	524.551	606.213	889.525	934.4	974.868
A0A0H2ZWU6	742.236	741.522	566.054	625.843	976.578	737.659	984.444	704.014	1029.73	680.846	930.978	611.569	562.3	833.917	599.926	1053.72	616.282	948.087	741.879	595.949	857.118	844.229	855.288	771.273	698.109	826.823	782.184
A0A0H2ZWU7	604.528	533.944	980.035	450.959	897.841	539.967	740.186	505.304	855.343	540.489	744.132	627.138	611.844	525.731	682.694	645.529	901.459	2720.52	569.236	715.497	718.904	622.745	697.916	685.635	568.787	664.112	1810.99
A0A0H2ZWU8	663.183	587.509	844.776	629.757	925.804	837.918	905.444	729.39	776.011	773.053	734.322	829.623	699.798	776.1	723.073	776.787	762.149	1123.34	625.346	737.266	881.861	817.417	774.532	781.972	737.949	749.93	942.743
A0A0H2ZWV1	580.922	371.092	1484.08	2451.88	377.56	417.288	365.467	300.94	315.697	318.376	327.708	312.766	1222.1	919.162	1176.77	876.26	1134.52	920.376	476.007	1967.98	397.424	333.204	317.037	320.237	1070.63	1026.51	1027.45
A0A0H2ZWV2	957.07	635.732	690.344	616.064	869.388	702.798	1016.48	707.331	944.329	708.631	943.506	697.644	595.162	713.764	569.58	808.454	492.782	1456.45	796.401	653.204	786.093	861.906	826.48	820.575	654.463	689.017	974.617
A0A0H2ZWV3	1165.19	1176.67	1197.64	1164.25	753.376	777.098	846.805	924.911	856.322	915.452	852.061	890.579	506.25	532.307	537.869	486.856	499.239	439.509	1170.93	1180.94	765.237	885.858	885.887	871.32	519.278	512.362	469.374
A0A0H2ZWV4	773.288	765.195	754.574	750.151	903.577	707.145	830.978	635.33	750.345	576.81	725.065	577.766	840.421	682.872	742.944	806.885	693.789	1542.9	769.241	752.363	805.361	733.154	663.578	651.416	761.647	774.914	1118.34
A0A0H2ZWV5	939.238	1101.62	975.149	830.713	1216.5	1282.29	616.125	614.664	543.986	673.901	467.514	538.021	809.033	676.746	809.39	603.128	746.447	879.545	1020.43	902.931	1249.4	615.394	608.944	502.768	742.889	706.259	812.996
A0A0H2ZWV6	920.343	1047.39	679.971	1062.46	890.19	1049.53	736.806	937.852	850.756	680.358	924.605	904.646	740.572	620.323	662.056	671.673	597.112	228.263	983.869	871.218	969.86	837.329	765.557	914.626	680.447	666.865	412.688
A0A0H2ZWV7	436.994	594.613	625.03	1135.41	587.191	383.078	407.574	431.128	635.792	467.758	339.933	651.863	1521.18	1016.03	784.139	1237.63	1389.68	845.177	515.803	880.222	485.134	419.351	551.775	495.898	1268.6	1010.88	1117.43
A0A0H2ZWV8	680.982	1109.62	1089.83	1457.11	538.377	675.516	346.803	585.087	452.112	469.007	462.595	549.253	1006.35	806.35	1049.22	838.132	1283.34	541.563	895.299	1273.47	606.947	465.945	460.56	505.924	906.351	943.676	912.452
A0A0H2ZWV9	574.994	582.166	660.658	601.448	859.676	900.838	869.737	812.32	868.379	874.41	876.672	876.944	738.265	853.135	755.686	772.013	740.279	797.157	578.58	631.053	880.257	841.028	871.395	876.808	795.7	763.849	768.718
A0A0H2ZWW0	749.578	799.645	746.362	718.55	1036.75	833.574	744.916	708.483	726.788	721.383	714.447	766.815	742.541	758.341	743.438	793.847	801.295	970.911	774.612	732.456	935.163	726.699	724.085	740.631	750.441	768.642	886.103
A0A0H2ZWW1	747.208	750.406	723.176	676.461	714.254	697.244	930.061	879.357	945.584	955.652	895.705	933.392	668.425	665.06	673.768	614.139	696.836	1012.84	748.807	699.819	705.749	904.709	950.618	914.548	666.743	643.953	854.84
A0A0H2ZWW2	941.417	640.829	882.367	695.785	934.146	748.904	823.799	879.136	875.145	1028.68	801.323	915.616	638.635	590.208	608.556	626.071	593.841	1072.82	791.123	789.076	841.525	851.467	951.911	858.47	614.421	617.314	833.331
A0A0H2ZWW3	735.862	745.962	774.502	687.304	755.135	774.286	707.851	555.212	690.868	651.527	669.166	596.169	826.941	878.997	891.759	814.071	909.562	1303.25	740.912	730.903	764.711	631.531	671.197	632.668	852.969	852.915	1106.41
A0A0H2ZWW4	637.036	650.348	743.774	779.377	1265.55	1171.75	862.745	633.913	781.941	798.107	841.519	752.973	630.081	619.36	665.878	612.557	614.392	1164.63	643.692	761.575	1218.65	748.329	790.024	797.246	624.72	639.217	889.511
A0A0H2ZWW5	631.084	924.796	373.793	544.27	525.234	791.316	503.366	978.209	543.898	535.813	806.602	687.017	1263.97	866.161	1198.25	1138.87	888.272	454.357	777.94	459.031	658.275	740.787	539.855	746.809	1065.06	1168.56	671.314
A0A0H2ZWW6	1045.47	745.293	699.142	586.351	737.406	615.486	851.073	683.381	865.128	558.667	828.487	530.094	722.94	653.143	695.963	1234.96	601.741	1274.85	895.384	642.746	676.446	767.227	711.898	679.291	688.042	965.46	938.295
A0A0H2ZWW7	1841.75	1506.07	1373.35	996.494	652.184	656.261	708.104	709.096	715.474	723.795	680.834	711.133	478.334	576.213	484.264	634.355	441.899	707.097	1673.91	1184.92	654.222	708.6	719.635	695.984	527.274	559.31	574.498
A0A0H2ZWW8	579.229	664.49	798.177	665.793	931.533	799.752	763.242	758.077	659.617	729.715	722.788	714.278	711.993	863.569	956.63	854.963	852.657	963.861	621.859	731.985	865.643	760.66	694.666	718.533	787.781	905.796	908.259
A0A0H2ZWX1	659.269	501.246	880.882	795.633	988.418	595.548	722.439	560.914	735.728	575.595	736.788	558.512	769.936	554.863	743.854	563.403	773.248	2420.72	580.257	838.257	791.983	641.677	655.662	647.65	662.399	653.628	1596.98
A0A0H2ZWX2	769.781	698.124	781.593	1081.37	799.821	835.264	585.769	654.91	630.681	543.856	597.492	707.601	1012.7	794.458	760.37	1155.55	995.804	432.676	733.952	931.48	817.542	620.339	587.269	652.547	903.58	957.96	714.24
A0A0H2ZWX3	625.74	720.261	610.382	788.854	808.911	927.681	572.725	902.747	703.202	719.562	710.44	842.731	963.817	884.55	872.965	874.81	990.586	369.523	673.001	699.618	868.296	737.736	711.382	776.586	924.183	873.887	680.054
A0A0H2ZWX4	648.077	750.693	431.322	760.105	662.104	810.984	525.175	794.351	633.885	616.107	755.586	781.609	1001.53	874.701	1012.71	937.085	1104.41	657.88	699.385	595.713	736.544	659.763	624.996	768.598	938.114	974.9	881.147
A0A0H2ZWX5	872.118	710.725	739.767	728.16	959.987	883.136	798.026	895.943	849.663	1037	887.06	1044.29	644.27	662.048	658.25	620.463	626.259	625.071	791.421	733.964	921.562	846.984	943.33	965.675	653.159	639.357	625.665
A0A0H2ZWX6	1020.76	1058.47	1462.81	1273.64	514.141	498.772	1072.86	933.11	878.867	1147.78	732.053	797.953	554.682	515.756	613.184	475.095	433.998	610.592	1039.62	1368.22	506.456	1002.99	1013.32	765.003	535.219	544.14	522.295
A0A0H2ZWX7	831.418	775.907	1012.76	996.011	736.355	771.667	956.563	942.643	780.662	994.089	770.423	866.456	636.473	820.846	740.771	454.5	643.339	607.973	803.662	1004.38	754.011	949.603	887.376	818.44	728.66	597.636	625.656
A0A0H2ZWX8	760.75	833.57	1551.23	1783.34	764.775	643.841	695.828	739.372	651.203	643.083	606.964	697.147	738.349	671.317	668.74	623.341	743.366	517.549	797.16	1667.28	704.308	717.6	647.143	652.055	704.833	646.04	630.458
A0A0H2ZWY0	1488.17	1115.86	967.863	776.972	604.057	600.997	741.225	689.93	730.04	723.552	730.712	660.113	617.084	679.96	655.122	739.762	641.122	1128.57	1302.01	872.418	602.527	715.577	726.796	695.412	648.522	697.442	884.847
A0A0H2ZWY1	674.435	561.976	420.999	614.563	844.03	555.93	995.326	625.76	750.321	529.03	764.581	475.237	994.512	626.225	677.313	599.95	785.667	2505.01	618.206	517.781	699.98	810.543	639.675	619.909	810.368	638.632	1645.34
A0A0H2ZWY2	723.685	737.739	845.548	729.158	937.253	818.553	775.446	674.942	730.794	703.339	709.989	737.354	757.47	762.711	758.118	784.322	782.719	1114.81	730.712	787.353	877.903	725.194	717.067	723.672	760.09	771.22	948.766
A0A0H2ZWY3	711.66	677.773	912.859	748.575	893.161	863.522	770.491	798.37	747.108	815.547	739.549	829.535	727.966	778.406	731.505	724.253	792.628	867.186	694.717	830.717	878.341	784.431	781.327	784.542	753.186	727.879	829.907
A0A0H2ZWY6	724.294	653.184	687.56	687.611	848.188	776.475	736.262	738.545	869.177	764.014	748.227	807.068	805.58	834.382	742.882	818.672	797.623	957.104	688.739	687.586	812.332	737.404	816.595	777.648	819.981	780.777	877.363
A0A0H2ZWY7	977.197	861.08	1114.02	1222.33	564.373	531.21	1024.85	898.299	984.843	956.045	784.162	736.21	582.579	596.01	617.957	594.163	522.91	814.176	919.138	1168.17	547.791	961.573	970.444	760.186	589.294	606.06	668.543
A0A0H2ZWY8	449.199	545.538	660.293	670.112	858.093	908.139	739.048	760.281	764.238	854.036	738.767	844.655	871.304	880.278	887.026	786.463	917.02	801.953	497.368	665.202	883.116	749.664	809.137	791.711	875.791	836.744	859.486
A0A0H2ZWY9	567.626	733.397	564.726	680.536	716.233	724.032	655.999	828.829	693.934	647.02	875.69	785.948	933.46	1001.07	886.938	1032.6	933.428	485.026	650.511	622.631	720.132	742.414	670.477	830.819	967.263	959.769	709.227
A0A0H2ZWZ1	709.152	651.733	684.684	709.402	808.984	726.275	772.497	708.677	785.744	732.775	757.493	717.832	814.592	891.86	799.044	918.088	819.979	920.434	680.442	697.043	767.629	740.587	759.26	737.662	853.226	858.566	870.207
A0A0H2ZWZ5	574.782	684.74	613.256	690.617	1084.36	1044.34	898.748	893.449	935.796	1013.58	841.787	976.736	685.732	667.633	678.485	590.326	667.008	659.071	629.761	651.937	1064.35	896.098	974.686	909.262	676.682	634.406	663.039
A0A0H2ZWZ6	837.465	794.086	758.559	718.196	824.164	751.932	800.18	770.25	837.241	743.061	805.126	711.354	720.829	872.198	704.623	915.95	724.401	724.081	815.776	738.377	788.048	785.215	790.151	758.24	796.513	810.287	724.241
A0A0H2ZWZ7	588.501	515.791	923.642	576.967	443.024	572.793	833.527	689.389	564.058	710.987	556.712	721.02	903.23	1003.31	1169.56	867.242	976.31	1286.39	552.146	750.305	507.909	761.458	637.522	638.866	953.268	1018.4	1131.35
A0A0H2ZWZ9	767.572	689.956	819.038	725.086	838.173	752.9	822.779	616.967	787.965	704.753	830.837	602.817	707.116	814.129	686.581	787.299	752.265	1340.79	728.764	772.062	795.537	719.873	746.359	716.827	760.623	736.94	1046.53
A0A0H2ZX01	615.399	752.475	738.474	707.048	866.855	932.457	769.719	846.466	795.415	901.859	756.526	899.648	765.635	769.183	844.56	668.375	807.562	673.426	683.937	722.761	899.656	808.093	848.637	828.087	767.409	756.467	740.494
A0A0H2ZX02	427.911	480.004	554.573	684.05	709.365	696.946	639.938	651.701	606.674	781.447	577.362	753.227	1125.11	1025.14	1005.13	652.219	1147.94	1307.69	453.957	619.312	703.155	645.819	694.06	665.294	1075.12	828.674	1227.82
A0A0H2ZX03	1174.79	1360.31	3233.13	2951.9	372.886	615.684	651.826	469.281	536.309	622.335	395.153	487.49	507.34	278.705	475.322	290.194	350.876	320.527	1267.55	3092.51	494.285	560.553	579.322	441.321	393.022	382.758	335.702
A0A0H2ZX04	603.363	480.528	756.205	635.281	920.214	773.466	894.451	641.445	838.541	651.557	806.813	630.971	769.893	817.998	739.129	861.193	667.941	1492.55	541.945	695.743	846.84	767.948	745.049	718.892	793.946	800.161	1080.25
A0A0H2ZX05	621.533	792.002	800.613	875.864	707.677	801.987	745.37	852.99	773.322	860.162	817.576	879.805	795.239	808.329	837.471	711.891	841.085	536.076	706.767	838.238	754.832	799.18	816.742	848.69	801.784	774.681	688.581
A0A0H2ZX06	1165.06	1021.69	879.304	508.343	1082.15	1253.55	796.844	809.944	827.2	644.319	780.928	748.371	569.942	583.212	589.667	714.33	480.536	896.312	1093.37	693.823	1167.85	803.394	735.76	764.65	576.577	651.999	688.424
A0A0H2ZX07	791.996	717.883	968.682	1112.32	573.691	611.773	892.402	957.042	809.75	852.046	930.133	880.706	740.543	704.493	746.487	742.444	586.149	541.238	754.94	1040.5	592.732	924.722	830.898	905.42	722.518	744.466	563.693
A0A0H2ZX09	792.528	614.661	743.401	659.313	854.646	829.459	745.803	705.229	674.358	817.499	706.141	794.261	789.183	804.512	806.055	750.777	870.645	1095.97	703.594	701.357	842.052	725.516	745.929	750.201	796.847	778.416	983.31
A0A0H2ZX10	653.842	705.04	1261.87	1181.51	530.725	594.231	1075.06	972.841	854.132	1250.65	713.604	909.432	623.198	674.227	876.475	490.474	565.246	485.656	679.441	1221.69	562.478	1023.95	1052.39	811.518	648.713	683.475	525.451
A0A0H2ZX14	866.991	866.74	487.765	660.614	882.189	957.46	704.516	972.471	917.233	608.467	1369.25	852.51	388.509	843.609	567.579	833.6	715.734	463.872	866.865	574.19	919.824	838.494	762.85	1110.88	616.059	700.59	589.803
A0A0H2ZX15	919.81	1024.15	1301.32	1939.95	801.143	677.896	577.573	718.316	872.323	527.211	639.396	731.408	559.699	708.945	732.278	688.771	749.743	112.306	971.982	1620.64	739.52	647.945	699.767	685.402	634.322	710.525	431.025
A0A0H2ZX16	716.723	912.018	595.086	505.412	516.996	720.996	548.362	1224.5	750.036	427.749	775.49	709.259	829.87	896.771	1108.66	1179.99	1002.42	320.224	814.37	550.249	618.996	886.429	588.892	742.375	863.32	1144.32	661.32
A0A0H2ZX17	786.128	728.334	983.029	924.64	918.588	848.703	812.882	688.77	762.56	746.421	625.818	760.705	727.878	772.274	719.595	789.405	750.767	810.973	757.231	953.834	883.645	750.826	754.49	693.261	750.076	754.5	780.87
A0A0H2ZX18	915.376	796.014	855.812	812.93	648.275	562.544	786.811	631.323	746.903	629.097	739.504	649.553	862.037	729.832	792.992	809.02	681.537	1415.29	855.695	834.371	605.41	709.067	688	694.529	795.934	801.006	1048.41
A0A0H2ZX19	1851.95	596.443	204.367	314.721	581.237	335.124	1013.75	536.897	1489.73	309.333	887.295	371.768	447.099	1194.8	355.777	2176.32	318.015	507.005	1224.2	259.544	458.18	775.324	899.534	629.531	820.947	1266.05	412.51
A0A0H2ZX20	834.428	647.509	701.385	624.5	873.054	738.922	879.621	680.803	904.937	714.744	803.277	693.66	681.743	777.064	668.155	798.759	679.992	1363.73	740.969	662.942	805.988	780.212	809.84	748.469	729.403	733.457	1021.86
A0A0H2ZX21	950.524	908.589	2093.51	1964.51	462.759	486.722	809.881	705.651	688.815	750.485	574.667	580.737	619.851	591.41	662.741	554.165	511.54	657.538	929.556	2029.01	474.74	757.766	719.65	577.702	605.63	608.453	584.539
A0A0H2ZX22	981.233	970.1	1045.96	1098.9	1211.34	1098.72	457.37	410.205	490.125	413.441	434.013	366.424	858.633	849.079	816.253	796.792	817.295	1022.93	975.667	1072.43	1155.03	433.788	451.783	400.218	853.856	806.523	920.112
A0A0H2ZX24	527.195	546.919	695.01	644.403	777.914	784.046	894.98	889.503	850.651	941.876	888.128	906.98	700.679	821.634	810.143	784.962	790.834	754.772	537.057	669.706	780.98	892.241	896.264	897.554	761.156	797.552	772.803
A0A0H2ZX25	864.283	817.452	771.631	807.411	833.448	788.998	809.221	667.165	823.956	670.134	768.165	645.735	664.942	731.411	872.287	798.869	637.209	1136.3	840.868	789.521	811.223	738.193	747.045	706.95	698.177	835.578	886.752
A0A0H2ZX26	1335.11	1352.77	1331.06	1164.23	975.649	977.57	509.562	609.59	552.109	710.967	423.072	589.814	726.732	705.3	746.095	602.01	661.441	494.165	1343.94	1247.65	976.61	559.576	631.538	506.443	716.016	674.052	577.803
A0A0H2ZX28	688.292	587.18	657.217	636.505	807.344	743.334	754.599	735.316	807.346	787.196	781.559	744.281	804.572	874.938	807.173	967.792	828.001	888.653	637.736	646.861	775.339	744.958	797.271	762.92	839.755	887.482	858.327
A0A0H2ZX29	1272.01	985.175	654.802	1240.83	718.772	706.684	432.792	618.603	857.864	426.79	537.791	660.362	908.486	868.829	725.936	1092.28	889.588	313.685	1128.59	947.814	712.728	525.698	642.327	599.076	888.657	909.107	601.637
A0A0H2ZX30	722.721	1213.28	851.41	778.27	749.271	681.679	784.657	677.876	742.129	751.981	753.401	755.416	728.89	700.923	789.858	699.951	869.11	885.856	968.001	814.84	715.475	731.266	747.055	754.409	714.906	744.904	877.483
A0A0H2ZX31	638.07	686.472	571.818	636.595	804.606	809.616	866.16	802.806	880.077	732.877	866.307	732.136	747.3	891.628	774.741	911.224	776.403	790.323	662.271	604.206	807.111	834.483	806.477	799.221	819.464	842.982	783.363
A0A0H2ZX33	606.322	410.997	725.048	555.062	850.347	751.095	803.219	634.02	722.559	763.746	794.927	733.183	814.88	821.499	811.074	761.376	817.581	1596	508.66	640.055	800.721	718.619	743.152	764.055	818.189	786.225	1206.79
A0A0H2ZX34	893.886	735.936	835.59	736.666	812.266	769.031	760.606	746.986	792.18	851.15	795.924	856.646	775.146	690.447	714.355	694.322	656.757	1051.09	814.911	786.128	790.649	753.796	821.665	826.285	732.797	704.338	853.922
A0A0H2ZX36	717.74	651.597	712.679	905.817	1119.62	785.15	971.886	811.956	964.512	855.068	992.648	831.979	527.49	727.57	540.435	751.136	509.579	784.06	684.668	809.248	952.387	891.921	909.79	912.314	627.53	645.786	646.819
A0A0H2ZX37	803.238	739.246	1017.3	803.351	773.862	751.922	774.999	769.616	811.087	727.955	710.697	746.442	722.427	737.328	692.654	686.69	759.715	1147.49	771.242	910.326	762.892	772.308	769.521	728.57	729.878	689.672	953.605
A0A0H2ZX38	889.135	814.704	574.685	560.356	869.371	691.434	453.419	606.91	561.462	417.353	794.116	467.348	889.422	674.646	824.091	1940.32	1018.41	433.328	851.92	567.52	780.403	530.165	489.408	630.732	782.034	1382.21	725.87
A0A0H2ZX39	621.862	547.086	756.242	655.753	703.316	634.822	779.24	654.442	752.391	745.947	738.371	735.593	870.448	836.86	863.848	810.701	851.235	1389.08	584.474	705.997	669.069	716.841	749.169	736.982	853.654	837.274	1120.16
A0A0H2ZX40	1294.46	1166.45	967.876	722.107	769.151	922.368	850.98	968.876	823.896	1032.07	773.779	1048.63	572.037	576.618	578.366	552.798	553.904	305.915	1230.45	844.992	845.76	909.928	927.985	911.206	574.328	565.582	429.909
A0A0H2ZX41	792.994	777.85	1526.18	932.261	858.921	806.317	813.666	730.6	699.945	687.245	693.763	619.392	579.188	555.96	618.183	525.566	642.383	1571.1	785.422	1229.22	832.619	772.133	693.595	656.578	567.574	571.875	1106.74
A0A0H2ZX42	600.17	552.802	606.18	597.134	850.376	816.562	827.704	797.945	800.604	812.79	761.941	781.912	848.666	899.914	814.498	890.07	814.154	848.887	576.486	601.657	833.469	812.824	806.697	771.926	874.29	852.284	831.521
A0A0H2ZX43	3508.73	3359.1	1619.63	1209.31	278.746	351.84	371.018	434.189	350.793	462.714	355.885	510.302	416.772	475.149	395.046	450.51	396.189	145.622	3433.91	1414.47	315.293	402.603	406.754	433.094	445.96	422.778	270.906
A0A0H2ZX44	696.444	548.063	876.212	618.106	888.406	499.85	1036.1	670.751	941.166	709.968	870.5	750.794	593.679	465.074	724.943	457.935	467.299	2485.28	622.253	747.159	694.128	853.427	825.567	810.647	529.376	591.439	1476.29
A0A0H2ZX46	702.514	901.265	874.625	837.502	898.757	943.365	786.442	729.56	689.534	777.469	728.405	765.344	745.781	816.751	806.627	802.905	786.829	507.912	801.89	856.063	921.061	758.001	733.502	746.875	781.266	804.766	647.371
A0A0H2ZX47	834.204	980.95	928.993	826.093	857.235	889.81	762.074	782.661	757.779	816.884	728.887	838.151	722.771	798.912	707.679	662.707	754.8	554.06	907.577	877.543	873.523	772.368	787.332	783.519	760.841	685.193	654.43
A0A0H2ZX48	664.065	639.522	559.366	628.069	1011.59	815.37	846.996	767.577	856.365	810.376	849.451	794.629	781.108	820.325	710.445	857.104	675.937	900.027	651.793	593.717	913.481	807.286	833.371	822.04	800.716	783.775	787.982
A0A0H2ZX49	720.091	695.642	645.313	738.731	939.954	852.701	810.83	744.816	831.111	769.914	743.86	751.125	711.408	767.546	765.538	635.234	809.827	1172.33	707.866	692.022	896.328	777.823	800.513	747.493	739.477	700.386	991.079
A0A0H2ZX50	1561.82	1404.24	1443.66	1404.56	549.186	497.472	767.618	790.217	770.75	680.256	632.758	521.676	579.715	593.507	495.329	603.36	527.994	715.174	1483.03	1424.11	523.329	778.917	725.503	577.217	586.611	549.344	621.584
A0A0H2ZX51	658.338	856.671	766.734	677.974	1119.26	1143.91	920.712	996.958	928.234	939.322	994.826	1030.22	521.14	510.887	529.563	603.043	600.126	511.358	757.505	722.354	1131.59	958.835	933.778	1012.52	516.014	566.303	555.742
A0A0H2ZX52	874.796	757.985	516.501	581.1	630.242	493.5	491.61	733.46	757.258	420.361	845.866	459.722	1022.96	980.93	838.117	1763.17	864.801	406.673	816.391	548.801	561.871	612.535	588.809	652.794	1001.94	1300.65	635.737
A0A0H2ZX53	867.69	1185.97	811.708	1178.86	939.538	1055.09	549.907	832.995	707.651	691.085	771.773	1017.23	833.796	546.68	751.931	493.25	756.291	294.722	1026.83	995.283	997.316	691.451	699.368	894.5	690.238	622.59	525.506
A0A0H2ZX54	1295.66	7.20797	1032.36	53.5139	610.007	50.1056	803.136	34.6622	797.6	53.7296	705.093	40.0162	668.357	48.1175	662.153	133.527	597.062	6769.41	651.433	542.937	330.057	418.899	425.665	372.555	358.237	397.84	3683.24
A0A0H2ZX55	707.321	605.506	716.779	1058.41	722.034	776.063	524.067	744.065	708.936	690.979	737.222	827.947	940.163	795.935	840.388	768.801	984.096	791.205	656.414	887.594	749.048	634.066	699.958	782.585	868.049	804.595	887.651
A0A0H2ZX57	841.258	745.75	732.189	815.631	948.204	801.812	847.425	735.963	835.154	750.835	842.078	791.341	657.351	755.599	671.485	699.798	660.32	1010.64	793.504	773.91	875.008	791.694	792.994	816.71	706.475	685.641	835.482
A0A0H2ZX58	909.126	522.596	589.486	696.546	1093.66	960.665	745.839	791.299	999.176	790.191	822.822	593.995	650.535	926.926	473.294	689.228	725.963	1095.76	715.861	643.016	1027.16	768.569	894.683	708.408	788.73	581.261	910.863
A0A0H2ZX62	709.263	516.766	621.945	588.854	772.421	715.292	771.873	677.886	776.828	775.353	756.798	728.132	848.261	758.759	815.379	753.556	853.727	1539.59	613.015	605.399	743.857	724.879	776.09	742.465	803.51	784.468	1196.66
A0A0H2ZX64	758.151	872.303	774.99	769.514	963.017	902.961	926.235	947.054	957.775	1004.22	1028.51	993.333	555.417	511.256	538.999	541.87	540.687	739.183	815.227	772.252	932.989	936.645	980.999	1010.92	533.336	540.434	639.935
A0A0H2ZX66	600.112	829.069	801.531	563.028	1032.12	1689.43	1418.14	820.343	823.563	943.831	1390.28	1264.1	303.579	446.041	447.491	456.31	289.925	355.997	714.59	682.279	1360.77	1119.24	883.697	1327.19	374.81	451.901	322.961
A0A0H2ZX69	398.664	419.596	444.532	446.932	719.648	667.759	875.33	785.751	894.381	840.041	870.36	820.063	882.281	818.943	886.596	801.248	852.13	1426.14	409.13	445.732	693.703	830.54	867.211	845.211	850.612	843.922	1139.13
A0A0H2ZX70	865.348	984.716	642.453	625.415	520.156	677.232	341.745	825.666	510.206	521.057	818.164	639.313	982.601	1026.71	1002.87	1213.46	1124.55	331.732	925.032	633.934	598.694	583.705	515.632	728.739	1004.66	1108.17	728.141
A0A0H2ZX71	837.791	331.911	661.549	406.621	761.983	653.635	831.957	682.325	781.004	712.269	798.428	700.336	772.183	595.576	768.932	621.895	765.422	2401.4	584.851	534.085	707.809	757.141	746.636	749.382	683.879	695.414	1583.41
A0A0H2ZX73	425.255	579.477	845.657	810.917	824.057	858.286	884.663	808.216	916.742	987.325	398.607	1050.86	901.056	811.438	877.244	621.058	917.899	625.106	502.366	828.287	841.172	846.44	952.034	724.731	856.247	749.151	771.503
A0A0H2ZX74	936.746	711.744	444.059	762.444	944.751	771.074	898.03	783.76	1313.09	781.663	912.135	855.759	536.281	806.125	507.223	885.946	526.614	671.994	824.245	603.251	857.912	840.895	1047.38	883.947	671.203	696.585	599.304
A0A0H2ZX75	779.913	997.435	800.009	926.879	878.389	919.322	545.755	634.015	600.229	645.823	553.823	586.205	980.943	844.717	954.455	773.94	873.281	740.725	888.674	863.444	898.856	589.885	623.026	570.014	912.83	864.198	807.003
A0A0H2ZX76	770.622	902.766	527.532	645.778	901.965	933.468	872.856	891.201	1144.47	862.485	805.667	763.274	678.895	737.328	681.565	639.976	606.339	798.219	836.694	586.655	917.716	882.028	1003.48	784.47	708.111	660.771	702.279
A0A0H2ZX77	1300.67	498.035	503.196	410.933	543.822	511.66	504.194	664.983	726.581	447.031	887.716	487.89	1040.79	1193.27	740.026	1774.46	675.962	535.061	899.351	457.065	527.741	584.589	586.806	687.803	1117.03	1257.25	605.511
A0A0H2ZX79	943.251	155.517	1201.44	1741.09	684.378	361.819	635.862	333.188	700.615	361.869	567.725	362.599	813.147	744.37	678.507	960.887	873.565	1845.55	549.384	1471.27	523.099	484.525	531.242	465.162	778.758	819.697	1359.56
A0A0H2ZX80	825.057	1152.11	634.074	760.947	1093.46	1558.52	245.235	343.86	286.345	347.359	334.204	345.782	1211.9	1001.44	1043.5	949.195	1200.29	509.025	988.584	697.51	1325.99	294.547	316.852	339.993	1106.67	996.346	854.655
A0A0H2ZX82	1141.48	1475.15	1020.95	1189.83	478.466	604.807	434.645	794.936	546.489	742.674	636.908	831.541	998.67	551.208	960.504	610.44	801.859	442.306	1308.32	1105.39	541.636	614.79	644.582	734.224	774.939	785.472	622.083
A0A0H2ZX85	1044.28	817.356	806.787	708.275	643.497	902.171	496.23	961.359	601.942	665.592	820.613	862.777	903.569	841.947	846.882	893.601	798.884	383.148	930.82	757.531	772.834	728.795	633.767	841.695	872.758	870.242	591.016
A0A0H2ZX86	1325.76	1016.66	679.548	1183.78	963.801	669.923	454.833	629.538	656.688	588.763	812.735	413.354	716.856	723.49	597.663	940.835	817.485	843.753	1171.21	931.663	816.862	542.185	622.726	613.045	720.173	769.249	830.619
A0A0H2ZX88	1602.41	502.616	1260.79	565.953	638.065	844.677	515.387	717.147	567.389	874.112	581.875	950.774	748.039	672.888	699.373	722.136	626.039	1261.02	1052.52	913.37	741.371	616.267	720.751	766.325	710.463	710.755	943.531
A0A0H2ZX89	1215.57	1379.87	1606.37	2022.43	389.058	325.289	681.734	552.781	573.159	539.629	558.075	499.3	718.426	568.454	775.561	657.488	728.125	615.959	1297.72	1814.4	357.174	617.257	556.394	528.688	643.44	716.524	672.042
A0A0H2ZX90	259.871	269.844	306.714	233.38	1015.16	978.697	813.952	818.317	947.539	948.374	1005.68	936.809	816.371	952.935	793.645	789.038	819.413	1098.13	264.857	270.047	996.928	816.134	947.957	971.243	884.653	791.341	958.77
A0A0H2ZX91	2297.8	1583.1	616.068	835.324	578.159	781.564	509.012	860.472	680.984	854.071	853.626	753.006	558.085	531.112	584.036	542.588	523.366	560.506	1940.45	725.696	679.862	684.742	767.527	803.316	544.598	563.312	541.936
A0A0H2ZX93	725.206	736.715	733.976	632.911	900.217	805.378	926.756	932.848	950.169	939.63	877.54	1028.19	655.634	664.67	623.949	745.496	629.882	660.533	730.961	683.444	852.798	929.802	944.899	952.863	660.152	684.722	645.208
A0A0H2ZX96	1081.36	865.27	1300.58	1001.13	671.563	811.149	902.543	826.825	752.079	818.808	664.463	857.775	642.939	682.401	617.771	649.056	591.567	658.632	973.316	1150.85	741.356	864.684	785.443	761.119	662.67	633.414	625.099
A0A0H2ZX97	433.455	190.687	535.599	472.861	1023.77	1654.79	648.914	602.184	681.791	537.763	503.776	664.488	1050.41	673.734	917.333	1436.4	1057.78	590.853	312.071	504.23	1339.28	625.549	609.777	584.132	862.071	1176.86	824.318
A0A0H2ZX98	1122.26	1022.18	866.405	1019.22	842.333	847.295	755.464	828.2	873.779	698.208	745.683	713.907	645.237	718.323	595.837	698.855	660.11	597.817	1072.22	942.812	844.814	791.832	785.994	729.795	681.78	647.346	628.963
A0A0H2ZX99	720.159	609.13	709.913	593.674	916.633	903.771	802.389	710.545	815.429	839.837	797.703	822.738	686.507	725.869	759.69	849.5	779.116	1004.06	664.644	651.794	910.202	756.467	827.633	810.22	706.188	804.595	891.589
A0A0H2ZXA0	984.352	937.259	297.337	572.037	981.811	776.61	253.27	689.078	414.799	628.098	845.234	753.303	1458.9	932.532	960.592	859.962	596.924	854.858	960.806	434.687	879.21	471.174	521.448	799.268	1195.72	910.277	725.891
A0A0H2ZXA1	709.086	760.276	655.888	667.039	705.856	864.894	850.723	966.003	876.345	893.087	711.801	1004.41	856.022	687.748	877.622	688.747	720.871	633.309	734.681	661.464	785.375	908.363	884.716	858.107	771.885	783.185	677.09
A0A0H2ZXA2	614.479	799.825	455.869	639.83	812.823	1060.54	541.369	852.087	564.622	685.823	727.407	856.928	984.685	753.912	1017.17	749.226	1080.93	713.26	707.152	547.849	936.684	696.728	625.222	792.168	869.298	883.198	897.093
A0A0H2ZXA3	578.761	669.649	670.188	647.038	905.751	826.322	789.179	753.743	762.445	761.596	796.302	760.004	797.891	851.168	800.973	837.654	830.611	922.889	624.205	658.613	866.037	771.461	762.02	778.153	824.53	819.314	876.75
A0A0H2ZXA5	466.399	530.238	552.162	809.662	859.27	912.414	705.076	798.734	731.417	826.061	709.634	845.947	891.54	879.612	933.683	786.111	1000.26	663.837	498.319	680.912	885.842	751.905	778.739	777.79	885.576	859.897	832.049
A0A0H2ZXA6	1305.23	1132.22	1101.7	942.562	765.389	701.422	727.664	776.041	765.014	804.286	754.869	751.729	564.297	684.865	589.226	715.21	618.859	644.017	1218.72	1022.13	733.406	751.852	784.65	753.299	624.581	652.218	631.438
A0A0H2ZXA7	1048.01	1332.65	746.187	999.988	686.099	748.387	578.495	707.303	612.685	508.63	705.315	547.534	967.11	846.849	893.48	791.813	746.162	585.303	1190.33	873.088	717.243	642.899	560.657	626.425	906.979	842.646	665.732
A0A0H2ZXA8	600.753	811.717	746.773	824.962	1191.68	930.288	898.21	827.438	883.866	914.912	729.67	880.148	655.087	732.737	650.377	638.132	685.373	616.127	706.235	785.867	1060.98	862.824	899.389	804.909	693.912	644.255	650.75
A0A0H2ZXA9	1953.71	1036.25	2068.13	1139.03	357.444	974.8	701.464	765.424	765.59	759.911	599.483	663.872	446.049	614.483	386.751	573.159	283.038	698.937	1494.98	1603.58	666.122	733.444	762.75	631.677	530.266	479.955	490.988
A0A0H2ZXB1	1971.57	1625.91	526.541	602.82	1055.45	1023.17	698.821	710.703	937.363	800.95	879.105	841.562	397.395	690.667	391.545	522.683	374.931	460.701	1798.74	564.68	1039.31	704.762	869.157	860.334	544.031	457.114	417.816
A0A0H2ZXB3	618.089	674.351	658.316	631.975	823.956	813.31	793.16	780.488	829.166	860.431	828.632	849.308	797.005	801.551	792.656	730.342	789.55	952.774	646.22	645.145	818.633	786.824	844.799	838.97	799.278	761.499	871.162
A0A0H2ZXB4	856.682	764.707	1370.9	1040.96	665.202	664.792	475.182	632.421	642.713	635.606	704.495	558.795	797.583	823.932	653.785	929.649	905.621	927.266	810.695	1205.93	664.997	553.801	639.159	631.645	810.758	791.717	916.444
A0A0H2ZXB5	1147.54	1031.75	995.499	804.651	549.74	734.353	578.743	705.143	577.829	788.857	575.237	782.523	912.166	697.32	856.07	623.592	861.792	1001.13	1089.64	900.075	642.047	641.943	683.343	678.88	804.743	739.831	931.463
A0A0H2ZXB6	1282.46	1264.91	1328.13	1187.72	732.836	686.447	729.785	806.581	742.39	929.671	710.032	923.048	564.249	541.902	574.262	446.793	583.865	529.849	1273.69	1257.92	709.641	768.183	836.031	816.54	553.076	510.527	556.857
A0A0H2ZXB7	1145.27	599.704	478.519	737.243	776.227	779.664	912.061	821.783	714.841	913.76	830.559	773.85	729.893	829.99	706.029	797.508	716.413	809.752	872.487	607.881	777.945	866.922	814.3	802.204	779.942	751.768	763.083
A0A0H2ZXC0	1182.9	801.52	955.068	861.371	633.175	653.191	672.98	700.927	998.132	756.212	1481.59	709.595	395.064	517.023	412.271	603.429	334.445	1580.89	992.208	908.22	643.183	686.953	877.172	1095.59	456.043	507.85	957.667
A0A0H2ZXC1	515.503	477.012	558.27	464.066	621.218	624.006	751.136	617.542	697.114	647.494	717.887	620.399	1080.04	881.265	1006.44	960.449	889.368	1626.67	496.258	511.168	622.612	684.339	672.304	669.143	980.655	983.446	1258.02
A0A0H2ZXC3	925.944	1110.95	2062.96	1514.97	361.285	355.334	668.73	709.745	551.164	738.118	471.13	611.27	887.791	745.454	774.544	609.647	602.543	751.298	1018.45	1788.97	358.309	689.238	644.641	541.2	816.622	692.096	676.92
A0A0H2ZXC4	750.471	581.684	624.681	560.301	648.533	713.168	705.613	737.845	842.786	898.188	732.858	852.779	926.72	893.252	839.244	914.979	839.64	840.271	666.077	592.491	680.851	721.729	870.487	792.819	909.986	877.112	839.955
A0A0H2ZXC6	1298.25	1042.55	1523.2	1248.34	637.588	648.455	775.762	741.26	718.161	807.799	624.706	675.871	581.123	596.42	612.014	623.347	538.89	810.729	1170.4	1385.77	643.021	758.511	762.98	650.288	588.771	617.68	674.809
A0A0H2ZXC8	784.897	662.635	749.596	758.425	849.446	976.774	715.589	733.432	747.295	758.867	711.922	774.861	815.391	833.353	775.946	823.041	830.138	728.656	723.766	754.01	913.11	724.511	753.081	743.391	824.372	799.494	779.397
A0A0H2ZXD0	575.983	795.804	778.203	714.784	886.302	919.288	761.423	763.39	775.629	754.516	766.119	742.958	666.864	765.584	808.487	768.155	935.953	867.151	685.894	746.494	902.795	762.406	765.072	754.538	716.224	788.321	901.552
A0A0H2ZXD1	745.852	662.665	890.918	746.708	727.753	667.148	848.663	695.98	770.761	746.21	742.901	709.005	758.371	752.461	787.332	686.532	753.382	1422.83	704.258	818.813	697.451	772.322	758.486	725.953	755.416	736.932	1088.11
A0A0H2ZXD2	866.202	784.153	966.986	855.165	878.89	899.155	887.117	763.52	788.461	799.492	815.756	802.763	628.742	759.002	648.974	720.938	622.83	733.064	825.178	911.076	889.023	825.319	793.977	809.259	693.872	684.956	677.947
A0A0H2ZXD4	547.089	652.636	486.096	589.451	690.826	850.083	684.841	698.974	625.025	492.162	731.426	669.326	1057.89	782.218	999.589	921.728	986.623	1320.17	599.863	537.774	770.454	691.907	558.594	700.376	920.057	960.659	1153.4
A0A0H2ZXD5	2016.49	1605.96	1521.39	1154.45	309.066	296.451	785.418	735.098	769.391	886.104	722.297	834.719	529.222	568.917	457.345	559.347	314.728	617.945	1811.22	1337.92	302.759	760.258	827.748	778.508	549.069	508.346	466.336
A0A0H2ZXD6	2059.7	1071.5	559.025	642.049	496.601	556.009	467.787	640.228	472.435	432.414	567.932	518.566	870.441	767.098	748.136	1722.68	855.267	335.837	1565.6	600.537	526.305	554.007	452.424	543.249	818.77	1235.41	595.552
A0A0H2ZXD7	1681.51	1356.96	1046.84	785.849	668.112	587.263	708.845	645.747	651.95	814.547	688.051	707.356	567.824	795.539	619.6	752.478	610.017	669.535	1519.24	916.344	627.687	677.296	733.248	697.704	681.682	686.039	639.776
A0A0H2ZXD8	777.431	717.36	799.304	1022.63	573.801	532.467	496.857	578.553	585.376	467.355	585.987	599.398	1078.88	816.765	1025.36	1045.13	978.382	1122.8	747.396	910.965	553.134	537.705	526.365	592.692	947.823	1035.24	1050.59
A0A0H2ZXD9	834.301	885.699	989.319	860.324	843.735	790.144	658.28	1055.53	745.856	794.603	757.3	740.683	726.269	595.526	706.047	733.873	781.796	707.986	860	924.821	816.94	856.906	770.229	748.991	660.897	719.96	744.891
A0A0H2ZXE1	511.35	642.495	1014.94	840.013	950.71	918.507	926.372	859.406	799.241	1006.62	621.666	913.411	735.418	753.859	795.228	513.905	716.697	767.625	576.922	927.479	934.609	892.889	902.93	767.539	744.639	654.566	742.161
A0A0H2ZXE2	786.609	824.854	910.95	896.905	715.047	858.244	525.418	714.836	557.031	667.287	616.62	647.162	912.92	924.892	984.65	946.511	952.576	497.599	805.732	903.928	786.646	620.127	612.159	631.891	918.906	965.581	725.087
A0A0H2ZXE4	552.172	783.585	746.123	742.639	663.42	710.842	709.725	915.952	686.827	1156.76	754.666	1117.82	891.729	708.001	941.233	642.76	944.844	421.675	667.878	744.381	687.131	812.839	921.791	936.243	799.865	791.997	683.259
A0A0H2ZXE5	340.238	980.5	792.754	1217.22	702.706	979.923	224.511	805.073	214.746	587.549	256.172	707.203	1467.55	1052.52	1376.35	417.622	1372.77	425.016	660.369	1004.99	841.314	514.792	401.147	481.687	1260.03	896.988	898.891
A0A0H2ZXE7	686.447	914.905	638.05	1114.58	820.342	965.345	659.186	781.385	710.687	706.933	782.772	821.795	887.778	754.849	816.186	730.566	897.647	336.237	800.676	876.315	892.844	720.286	708.81	802.283	821.313	773.376	616.942
A0A0H2ZXE8	604.08	357	493.676	441.176	798.955	587.38	866.282	595.719	885	661.746	834.339	635.408	793.649	727.463	780.074	735.614	837.297	2279.87	480.54	467.426	693.168	731.001	773.373	734.873	760.556	757.844	1558.58
A0A0H2ZXF0	1456.13	582.065	608.821	711.96	816.508	896.311	710.194	732.352	743.35	791.993	646.985	778.131	712.471	783.245	696.425	719.275	706.658	1093.73	1019.1	660.39	856.409	721.273	767.671	712.558	747.858	707.85	900.192
A0A0H2ZXF2	1068.08	1248.1	768.077	874.354	638.167	667.702	843.538	741.957	848.2	806.711	819.101	865.825	684.092	653.662	683.422	653.888	696.808	677.083	1158.09	821.216	652.935	792.747	827.456	842.463	668.877	668.655	686.946
A0A0H2ZXF3	966.793	785.058	780.449	685.404	840.759	790.815	867.769	763.655	826.566	778.381	788.012	750.367	672.047	724.02	683.879	736.447	643.621	1090.27	875.926	732.927	815.787	815.712	802.474	769.19	698.034	710.163	866.944
A0A0H2ZXF4	751.319	1093.65	1073.1	910.713	550.019	729.648	597.627	806.518	680.281	696.072	582.189	819.47	927.271	821.507	984.02	741.844	859.34	484.402	922.483	991.907	639.834	702.073	688.176	700.829	874.389	862.932	671.871
A0A0H2ZXF5	525.033	802.453	721.219	957.197	830.511	778.561	572.941	951.088	759.985	685.827	796.713	774.989	977.698	786.478	756.41	873.877	922.974	438.17	663.743	839.208	804.536	762.015	722.906	785.851	882.088	815.143	680.572
A0A0H2ZXF6	505.159	799.688	690.328	739.2	972.763	965.885	807.616	906.858	834.325	764.063	710.467	952.338	865.953	820.739	810.124	859.482	752.791	258.589	652.423	714.764	969.324	857.237	799.194	831.403	843.346	834.803	505.69
A0A0H2ZXF7	753.384	400.793	537.882	577.618	730.461	657.366	687.595	689.087	835.661	758.54	804.774	789.227	790.475	710.445	1111.28	757.97	670.405	1708.06	577.089	557.75	693.914	688.341	797.101	797.001	750.46	934.625	1189.23
A0A0H2ZXF8	527.523	764.403	569.524	991.472	650.521	973.062	462.261	678.27	426.761	528.001	480.454	661.296	1227.99	1114.04	1212.24	853.753	1217.67	395.567	645.963	780.498	811.792	570.266	477.381	570.875	1171.02	1033	806.62
A0A0H2ZXF9	652.117	536.778	619.201	536.558	919.901	777.742	847.08	675.85	744.328	740.911	808.462	799.674	770.521	795.631	822.161	895.198	768.525	1239.26	594.448	577.88	848.821	761.465	742.619	804.068	783.076	858.68	1003.89
A0A0H2ZXG0	894.185	698.029	738.593	663.217	875.078	774.366	879.019	760.251	1065.04	879.205	831.502	814.5	581.064	656.842	617.147	695.391	584.497	1195.67	796.107	700.905	824.722	819.635	972.122	823.001	618.953	656.269	890.084
A0A0H2ZXG1	618.93	464.344	453.414	452.319	1107.48	907.536	956.279	994.898	1046	951.403	903.289	1108.13	691.776	826.171	573.285	803.135	610.44	571.377	541.637	452.867	1007.51	975.588	998.7	1005.71	758.974	688.21	590.908
A0A0H2ZXG2	2332.54	1313.95	1995.92	884.585	383.236	550.476	523.326	566.933	438.32	314.052	391.025	434.036	458.351	958.504	583.507	1365.01	480.912	394.775	1823.25	1440.25	466.856	545.129	376.186	412.531	708.428	974.258	437.844
A0A0H2ZXG3	744.007	752.012	850.795	662.519	784.342	749.318	890.253	873.923	821.427	853.49	804.295	800.569	708.888	790.221	719.425	863.222	707.226	709.204	748.01	756.657	766.83	882.088	837.458	802.432	749.554	791.324	708.215
A0A0H2ZXG4	756.726	693.624	948.267	718.368	701.27	683.769	836.889	808.865	792.343	770.727	888.166	747.192	711.892	922.849	731.592	954.639	664.388	669.312	725.175	833.317	692.519	822.877	781.535	817.679	817.37	843.116	666.85
A0A0H2ZXG5	697.228	552.877	666.32	752.092	545.465	723.204	412.719	778.411	708.053	737.782	1102.46	839.21	905.219	950.861	744.39	979.559	999.528	628.656	625.053	709.206	634.334	595.565	722.917	970.835	928.04	861.975	814.092
A0A0H2ZXG7	2662.52	3257.56	3035.02	2065.33	378.788	314.078	326.113	322.339	248.129	350.573	277.811	327.081	364.477	298.112	330.244	255.828	278.093	295.789	2960.04	2550.17	346.433	324.226	299.351	302.446	331.294	293.036	286.941
A0A0H2ZXG8	629.535	726.63	892.675	902.874	770.797	857.535	817.587	769.833	762.08	808.475	802.605	867.414	752.611	787.455	777.264	715.447	787.429	673.89	678.082	897.775	814.166	793.71	785.278	835.01	770.033	746.355	730.659
A0A0H2ZXG9	762.438	991.506	1086.43	1719	386.901	359.547	2005.87	1008.66	1260.44	1048.48	585.178	515.399	422.503	516.159	441.814	552.537	378.18	549.234	876.972	1402.71	373.224	1507.27	1154.46	550.288	469.331	497.175	463.707
A0A0H2ZXH1	761.364	766.149	682.198	629.372	831.308	802.477	753.828	767.014	805.872	908.706	784.992	901.844	744.72	959.822	732.865	840.165	860.934	458.338	763.756	655.785	816.893	760.421	857.289	843.418	852.271	786.515	659.636
A0A0H2ZXH2	582.214	702.774	623.943	864.133	587.961	733.425	561.67	679.817	611.284	689.014	684.788	644.361	1091.95	1132.9	1003.27	792.333	1064.59	732.715	642.494	744.038	660.693	620.743	650.149	664.574	1112.42	897.8	898.654
A0A0H2ZXH3	596.052	653.066	664.623	637.501	1018.21	970.91	955.44	916.414	802.437	893.77	817.084	830.047	695.006	743.221	720.72	821.586	722.211	627.925	624.559	651.062	994.557	935.927	848.104	823.566	719.114	771.153	675.068
A0A0H2ZXH5	745.542	814.461	786.423	674.978	944.725	996.895	827.983	994.762	854.614	930.726	861.059	867.737	663.723	792.694	688.61	628.571	652.882	480.889	780.001	730.7	970.81	911.372	892.67	864.398	728.208	658.591	566.886
A0A0H2ZXH7	641.169	669.645	717.214	792.761	897.739	861.542	778.587	730.081	773.557	768.704	748.951	866.953	809.628	732.81	764.373	703.839	826.544	985.43	655.407	754.987	879.641	754.334	771.131	807.952	771.219	734.106	905.987
A0A0H2ZXI1	318.691	289.117	297.978	218.305	211.361	284.297	553.124	1619.03	914.204	993.587	837.672	1286.65	1314.37	855.986	948.38	1059.45	1199.09	358.868	303.904	258.141	247.829	1086.08	953.896	1062.16	1085.18	1003.91	778.981
A0A0H2ZXI2	1057.23	1083.81	1632.39	1311.56	734.102	864.542	818.89	714.018	795.404	777.563	686.447	803.159	509.384	515.118	501.575	531.255	568.103	663.346	1070.52	1471.97	799.322	766.454	786.483	744.803	512.251	516.415	615.724
A0A0H2ZXI3	792.627	992.884	1158.84	1724.85	575.125	576.134	847.841	1081.98	720.116	988.506	671.078	694.976	756.19	675.342	852.355	322.727	721.002	273.072	892.755	1441.84	575.63	964.912	854.311	683.027	715.766	587.541	497.037
A0A0H2ZXI5	1643.71	1463.58	1470.63	2077.17	352.661	465.628	404.488	561.195	437.889	359.63	534.854	356.743	803.055	663.63	791.442	695.66	790.465	478.366	1553.64	1773.9	409.144	482.842	398.76	445.798	733.342	743.551	634.415
A0A0H2ZXI7	1613.05	1562.17	1378.95	1745.96	524.178	397.54	546.058	674.508	665.191	650.153	577.707	743.946	657.855	501.805	623.569	542.562	679.742	441.941	1587.61	1562.46	460.859	610.283	657.672	660.826	579.83	583.066	560.842
A0A0H2ZXI8	455.414	810.661	1162.59	906.508	554.358	814.342	648.095	823.324	501.353	820.342	543.171	884.581	1083.27	820.828	952.651	526.265	1044.5	774.832	633.037	1034.55	684.35	735.71	660.848	713.876	952.047	739.458	909.666
A0A0H2ZXI9	829.734	803.067	1067.62	892.383	782.739	875.601	623.485	769.703	745.491	794.522	744.781	754.427	727.483	737.168	764.544	650.23	766.765	869.845	816.401	980.003	829.17	696.594	770.007	749.604	732.326	707.387	818.305
A0A0H2ZXJ0	492.485	497.03	612.753	531.25	751.447	753.295	882.65	788.136	854.595	815.243	920.923	861.452	803.969	824.826	789.065	788.421	783.726	1183.13	494.757	572.001	752.371	835.393	834.919	891.187	814.397	788.743	983.429
A0A0H2ZXJ1	1015.34	956.443	759.328	646.973	1032.87	1055.57	628.878	665.249	700.583	704.734	465.483	531.558	875.014	867.988	736.019	732.662	841.549	926.182	985.889	703.151	1044.22	647.063	702.659	498.52	871.501	734.341	883.866
A0A0H2ZXJ2	1448.02	1110.85	936.552	870.507	526.724	580.822	449.19	789.943	573.678	485.348	853.827	450.649	788.332	856.788	728.452	1355.71	752.384	324.737	1279.43	903.529	553.773	619.567	529.513	652.238	822.56	1042.08	538.561
A0A0H2ZXJ3	622.212	605.823	654.905	556.789	835.39	881.21	763.829	840.731	797.497	884.552	841.479	922.834	872.126	746.732	792.004	706.895	743.433	975.376	614.018	605.847	858.3	802.28	841.025	882.156	809.429	749.45	859.404
A0A0H2ZXJ4	953.665	836.862	1014.01	812.309	523.892	503.469	821.246	679.586	803.961	791.799	785.906	751.362	731.961	692.165	740.259	660.338	696.049	1393.84	895.264	913.16	513.681	750.416	797.88	768.634	712.063	700.299	1044.94
A0A0H2ZXJ5	570.183	646.677	1036.12	891.876	725.514	771.594	862.893	869.109	757.474	958.907	730.614	877.989	771.066	912.923	803.265	651.01	771.243	536.998	608.43	963.996	748.554	866.001	858.191	804.302	841.994	727.138	654.121
A0A0H2ZXJ6	1146.96	821.704	589.127	525.43	718.712	714.561	1014.44	920.057	910.049	735.871	983.63	776.622	506.137	987.013	701.375	1031.02	505.272	429.276	984.331	557.279	716.636	967.249	822.96	880.126	746.575	866.198	467.274
A0A0H2ZXJ7	947.115	1074.38	1009.44	1235.46	792.287	737.057	569.353	741.213	646.356	734.852	677.378	767.782	806.375	700.002	765.135	681.315	831.335	482.929	1010.75	1122.45	764.672	655.283	690.604	722.58	753.188	723.225	657.132
A0A0H2ZXJ9	625.539	487.058	680.6	590.119	690.032	624.138	757.769	619.975	708.166	653.72	708.773	622.014	908.667	1050.62	929.617	962.85	900.306	1275.91	556.298	635.36	657.085	688.872	680.943	665.394	979.642	946.234	1088.11
A0A0H2ZXK2	792.073	650.301	595.422	713.708	831.946	972.796	757.838	771.648	806.558	766.589	828.142	843.452	782.603	812.146	780.325	844.959	770.749	674.009	721.187	654.565	902.371	764.743	786.574	835.797	797.374	812.642	722.379
A0A0H2ZXK4	1100.76	605.925	1106.59	723.103	700.423	759.676	1147.59	1130.47	1046.31	1359.4	970.315	1270.61	426.326	522.599	390.552	534.916	347.157	400.579	853.345	914.847	730.049	1139.03	1202.85	1120.46	474.463	462.734	373.868
A0A0H2ZXK5	809.9	840.698	801.558	851.225	787.886	852.383	573.432	744.087	613.009	724.804	729.514	828.553	952.949	665.071	894.382	646.366	792.698	1004.01	825.299	826.391	820.135	658.76	668.906	779.034	809.01	770.374	898.356
A0A0H2ZXK8	639.101	844.097	749.991	756.131	764.351	806.968	685.698	870.229	697.993	757.495	693.407	763.266	891.188	834.258	1027.8	802.618	792.213	634.16	741.599	753.061	785.66	777.963	727.744	728.337	862.723	915.208	713.186
A0A0H2ZXL0	1263.45	996.035	980.576	792.8	905.673	798.983	701.843	555.771	708.658	530.468	835.816	584.301	646.164	560.968	663.817	521.98	459.952	1851.38	1129.74	886.688	852.328	628.807	619.563	710.059	603.566	592.899	1155.67
A0A0H2ZXL1	439.624	488.749	807.12	722.555	782.335	929.164	828.891	808.601	727.418	1025.97	675.813	976.32	812.547	742.642	961.473	713.543	904.81	723.299	464.187	764.837	855.749	818.746	876.693	826.067	777.594	837.508	814.055
A0A0H2ZXL2	826.831	841.823	864.625	657.833	724.294	722.266	815.812	762.528	753.549	716.284	822.605	657.596	724.095	576.452	775.16	654.264	717.867	1566.56	834.327	761.229	723.28	789.17	734.916	740.101	650.273	714.712	1142.21
A0A0H2ZXL4	611.359	546.259	595.878	586.348	812.797	721.793	892.826	696.015	839.967	813.55	821.966	771.493	822.749	777.264	786.427	769.811	748.929	1371.39	578.809	591.113	767.295	794.421	826.758	796.729	800.007	778.119	1060.16
A0A0H2ZXL5	1482.21	1025.99	1051.25	949.578	778.701	762.441	684.598	980.426	968.529	1230.37	861.522	974.792	452.47	624.802	461.243	496.451	481.655	262.874	1254.1	1000.41	770.571	832.512	1099.45	918.157	538.636	478.847	372.264
A0A0H2ZXL7	900.165	867.543	721.412	702.683	505.141	690.375	587.653	611.619	631.186	656.221	735.24	674.368	547.231	1140.87	1060.55	1071.05	1225.95	453.525	883.854	712.048	597.758	599.636	643.703	704.804	844.053	1065.8	839.737
A0A0H2ZXL9	917.323	783.348	936.534	779.049	764.571	794.961	800.846	752.127	812.834	737.646	795.789	745.703	667.676	690.194	684.256	705.132	692.47	1131.34	850.336	857.792	779.766	776.486	775.24	770.746	678.935	694.694	911.906
A0A0H2ZXM0	1365.05	554.54	801.368	409.326	585.263	607.151	889.418	749.364	733.776	818.202	943.967	903.982	745.103	495.248	680.736	849.344	380.621	1694.09	959.793	605.347	596.207	819.391	775.989	923.974	620.175	765.04	1037.36
A0A0H2ZXM1	654.437	788.111	622.855	768.706	2518.24	894.517	716.03	757.683	681.99	986.781	930.326	916.331	335.396	723.062	382.132	661.457	326.003	672.255	721.274	695.781	1706.38	736.856	834.386	923.328	529.229	521.795	499.129
A0A0H2ZXM2	670.559	595.121	641.852	582.512	983.745	768.923	843.056	722.671	872.685	730.15	901.081	718.838	689.333	808.147	729.134	825.714	646.525	1273.13	632.84	612.182	876.334	782.864	801.418	809.96	748.74	777.424	959.828
A0A0H2ZXM3	793.397	843.316	548.361	674.72	791.268	787.668	623.197	887.256	745.962	665.828	913.676	853.246	814.73	903.098	788.382	914.114	863.152	475.102	818.356	611.541	789.468	755.227	705.895	883.461	858.914	851.248	669.127
A0A0H2ZXM4	525.43	878.345	447.723	835.813	572.439	757.597	416.679	871.851	634.333	685.431	707.825	688.677	1113.5	979.797	1162.33	922.708	1142.59	364.966	701.887	641.768	665.018	644.265	659.882	698.251	1046.65	1042.52	753.779
A0A0H2ZXM5	645.527	441.462	775.076	687.893	804.634	685.295	640.747	616.675	702.855	788.67	692.633	700.302	866.76	773.53	944.011	599.167	866.357	1804.86	543.494	731.484	744.964	628.711	745.763	696.468	820.145	771.589	1335.61
A0A0H2ZXM6	646.935	842.178	761.872	638.691	1014.44	1105.55	760.708	536.814	687.804	585.706	671.135	550.477	717.532	860.221	819.346	976.05	907.285	876.359	744.556	700.281	1060	648.761	636.755	610.806	788.876	897.698	891.822
A0A0H2ZXM8	1099.14	1189.38	955.721	730.075	822.349	836.448	849.558	869.114	822.022	903.334	868.482	903.214	591.043	667.126	565.388	645.659	561.592	469.356	1144.26	842.898	829.399	859.336	862.678	885.848	629.085	605.523	515.474
A0A0H2ZXM9	425.274	475.521	452.564	515.364	789.97	825.089	513.687	783.48	653.182	554.087	734.006	854.852	1101.89	782.922	1042.78	1056.1	1039.12	1079.1	450.398	483.964	807.53	648.584	603.635	794.429	942.404	1049.44	1059.11
A0A0H2ZXN0	629.652	651.72	693.339	624.08	764.095	763.344	830.341	742.393	842.097	737.595	760.901	699.773	812.74	901.625	798.818	900.4	813.997	963.853	640.686	658.71	763.719	786.367	789.846	730.337	857.183	849.609	888.925
A0A0H2ZXN1	968.25	1023.96	1073.46	1102.28	742.17	699.736	743.648	756.967	746.247	762.689	730.138	751.882	673.156	647.921	717.581	650.964	712.732	774.995	996.104	1087.87	720.953	750.307	754.468	741.01	660.539	684.272	743.863
A0A0H2ZXN2	491.305	922.536	743.008	760.889	706.638	1099.33	433.984	802.293	452.108	708.041	497.105	721.49	1079.76	928.014	1185.22	738.961	1231.53	407.788	706.921	751.948	902.982	618.139	580.074	609.298	1003.89	962.092	819.662
A0A0H2ZXN3	655.801	667.478	791.856	700.731	919.373	930.475	827.335	861.284	811.812	852.317	727.821	839.983	797.397	801.035	722.555	704.591	747.811	759.145	661.639	746.293	924.924	844.309	832.064	783.902	799.216	713.573	753.478
A0A0H2ZXN5	889.458	1050.09	573.391	959.604	643.309	637.281	473.757	657.98	558.945	460.681	758.954	613.49	1015.04	852.227	892.701	1020.4	1039.52	691.979	969.776	766.497	640.295	565.869	509.813	686.222	933.633	956.55	865.751
A0A0H2ZXN6	722.721	776.327	949.98	845.148	786.568	707.237	840.913	703.774	844.262	787.849	781.813	763.308	732.283	737.643	733.284	720.291	657.96	1059.73	749.524	897.564	746.903	772.344	816.056	772.561	734.963	726.788	858.846
A0A0H2ZXN9	966.692	939.556	797.822	848.329	819.436	840.958	1048.46	831.923	943.629	937.903	796.697	870.689	569.998	668.248	596.81	658.46	578.819	594.149	953.124	823.075	830.197	940.193	940.766	833.693	619.123	627.635	586.484
A0A0H2ZXP0	921.157	643.27	1404.59	1124.61	759.067	864.343	604.532	651.839	1059.02	672.197	715.262	736.791	550.544	806.576	566.931	721.378	606.297	853.134	782.214	1264.6	811.705	628.185	865.61	726.026	678.56	644.155	729.715
A0A0H2ZXP2	666.8	610.216	653.065	601.191	793.293	765.048	796.672	747.451	808.024	824.088	811.579	799.2	761.944	806.105	775.439	774.137	864.878	1132.92	638.508	627.128	779.171	772.062	816.056	805.39	784.024	774.788	998.898
A0A0H2ZXP3	705.209	642.192	530.303	542.675	988.709	702.742	737.99	774.258	541.791	710.364	670.859	919.005	737.063	698.535	1054.46	895.304	961.719	1143.22	673.701	536.489	845.725	756.124	626.078	794.932	717.799	974.882	1052.47
A0A0H2ZXP4	778.464	800.297	733.611	626.354	801.645	788.791	888.586	849.986	878.23	942.73	871.804	950.85	682.861	677.741	680.014	761.994	691.488	735.746	789.38	679.982	795.218	869.286	910.48	911.327	680.301	721.004	713.617
A0A0H2ZXP5	780.171	745.858	780.298	672.168	1192.01	1075.52	703.332	706.872	752.676	768.557	628.711	692.365	780.595	922.031	714.557	726.253	715.28	766.929	763.014	726.233	1133.76	705.102	760.616	660.538	851.313	720.405	741.104
A0A0H2ZXP6	556.611	540.402	646.774	606.844	827.897	745.398	765.869	701.724	718.49	809.63	751.698	774.673	842.433	885.829	906.492	777.517	889.71	1187.77	548.506	626.809	786.648	733.797	764.06	763.185	864.131	842.005	1038.74
A0A0H2ZXP8	647.919	749.101	745.802	1121.62	742.546	890.612	522.068	752.859	617.731	654.469	597.777	816.365	1012.97	759.059	971.58	727.056	1027.12	628.647	698.51	933.713	816.579	637.464	636.1	707.071	886.016	849.318	827.883
A0A0H2ZXP9	902.055	589.641	691.033	576.495	813.228	742.74	768.209	745.882	801.189	834.542	786.434	809.875	749.333	839.288	725.536	880.196	760.317	993.238	745.848	633.764	777.984	757.046	817.865	798.154	794.311	802.866	876.777
A0A0H2ZXQ0	739.505	970.466	780.916	794.897	1001.39	1083.84	738.126	831.686	773.756	818.769	819.552	901.161	731.364	687.056	683.497	643.717	734.412	466.602	854.985	787.906	1042.62	784.906	796.263	860.357	709.21	663.607	600.507
A0A0H2ZXQ3	1061.65	808.793	749.503	807.404	840.879	941.29	650.747	768.195	760.65	745.033	788.441	850.677	740.899	703.539	721.779	779.699	714.669	702.557	935.219	778.454	891.085	709.471	752.841	819.559	722.219	750.739	708.613
A0A0H2ZXQ7	499.776	575.406	733.921	735.346	701.542	818.856	635.906	753.29	697.3	809.04	651.707	813.781	836.035	901.695	1041.76	881.354	1077.53	714.332	537.591	734.633	760.199	694.598	753.17	732.744	868.865	961.555	895.931
A0A0H2ZXQ9	2174.39	2347.33	1221.29	1086.05	327.185	448.158	825.503	565.79	505.238	599.878	482.362	626.803	717.778	550.589	755.351	529.769	387.049	543.925	2260.86	1153.67	387.672	695.647	552.558	554.582	634.183	642.56	465.487
A0A0H2ZXR0	774.465	693.12	778.748	650.737	864.728	878.722	762.126	694.965	761.863	773.377	754.77	756.986	725.813	746.043	784.391	809.04	794.451	1062.97	733.793	714.743	871.725	728.545	767.62	755.878	735.928	796.715	928.712
A0A0H2ZXR2	584.37	477.505	746.502	644.159	673.717	669.363	896.427	733.699	818.002	787.098	845.492	750.562	783.908	760.444	858.52	795.901	744.031	1419.42	530.937	695.33	671.54	815.063	802.55	798.027	772.176	827.211	1081.72
A0A0H2ZXR3	425.256	565.393	652.132	623.101	956.524	853.287	794.968	732.98	764.734	762.365	677.606	751.624	873.539	881.482	875.627	800.803	888.835	1057.24	495.324	637.616	904.905	763.974	763.55	714.615	877.51	838.215	973.036
A0A0H2ZXR8	522.561	508.899	568.261	574.872	812.989	822.544	843.275	770.769	844.868	821.511	825.22	826.226	834.061	967.415	811.103	952.035	829.316	713.493	515.73	571.566	817.767	807.022	833.189	825.723	900.738	881.569	771.404
A0A0H2ZXR9	1262.23	1032.78	520.855	720.208	818.647	893.541	573.829	860.76	743.516	626.116	1084.01	720.758	706.981	739.703	679.897	978.768	584.472	456.896	1147.51	620.531	856.094	717.294	684.816	902.384	723.342	829.332	520.684
A0A0H2ZXS0	797.883	636.521	525.416	484.814	751.836	821.944	718.005	786.748	763.108	711.115	886.722	781.245	877.847	699.023	810.225	1146.27	767.335	871.824	717.202	505.115	786.89	752.376	737.112	833.984	788.435	978.248	819.58
A0A0H2ZXS1	734.116	884.891	530.987	808.993	641.073	927.182	548.265	737.523	635.004	332.437	824.45	734.543	878.78	751.471	778.651	1358.43	1228.98	302.969	809.503	669.99	784.127	642.894	483.721	779.497	815.126	1068.54	765.975
A0A0H2ZXS5	780.801	905.876	866.007	889.743	676.923	807.436	598.983	797.129	635.508	704.235	713.309	769.197	845.643	828.877	881.589	770.25	952.849	606.864	843.338	877.875	742.18	698.056	669.872	741.253	837.26	825.919	779.857
A0A0H2ZXS8	646.33	625.788	622.267	544.878	895.172	823.169	881.979	779.554	951.284	778.601	865.621	792.109	695.701	740.649	708.124	858.316	699.126	1101.3	636.059	583.573	859.17	830.767	864.942	828.865	718.175	783.22	900.214
A0A0H2ZXS9	658.754	764.435	835.426	957.301	723.018	885.276	559.682	789.724	592.783	741.33	624.126	821.846	942.411	826.68	945.579	788.336	1032.38	498.208	711.594	896.364	804.147	674.703	667.056	722.986	884.545	866.958	765.295
A0A0H2ZXT0	825.378	825.51	629.309	982.923	687.048	890.909	782.122	732.794	754.64	725.816	833.867	711.248	592.475	866.102	798.305	842.696	1030.97	464.322	825.444	806.116	788.978	757.458	740.228	772.557	729.289	820.501	747.648
A0A0H2ZXT1	552.749	632.114	604.648	721.643	855.474	831.418	812.39	734.843	758.315	897.374	778.387	916.623	781.618	716.507	896.994	699.992	870.188	975.493	592.432	663.146	843.446	773.617	827.845	847.505	749.063	798.493	922.841
A0A0H2ZXT3	878.342	880.755	1027.83	891.605	656.791	620.704	946.905	897.501	821.619	978.671	808.048	925.286	685.282	600.313	661.203	545.958	618.308	895.644	879.549	959.717	638.748	922.203	900.145	866.667	642.798	603.58	756.976
A0A0H2ZXT4	497.801	419.856	725.513	615.686	1038.84	952.568	456.158	359.42	473.734	460.255	413.831	387.108	1075.97	1003.75	1037.55	1050.58	1155.73	1587.57	458.829	670.6	995.703	407.789	466.994	400.469	1039.86	1044.07	1371.65
A0A0H2ZXT5	1282.85	1505.44	938.275	1012.69	561.458	424.821	505.652	632.765	698.011	372.973	707.651	524.833	812.282	798.898	729.339	1219.59	817.433	400.77	1394.14	975.48	493.139	569.209	535.492	616.242	805.59	974.466	609.101
A0A0H2ZXT8	536.706	748.095	575.836	634.903	640.639	867.038	602.435	890.311	664.119	639.571	658.638	744.576	1053.94	880.195	1023.69	903.225	1057.39	696.062	642.4	605.37	753.838	746.373	651.845	701.607	967.069	963.46	876.726
A0A0H2ZXT9	815.418	789.934	949.72	854.536	830.666	850.363	727.924	735.2	729.039	736.56	709.492	735.282	756.018	713.115	779.243	733.029	750.369	960.711	802.676	902.128	840.514	731.562	732.799	722.387	734.566	756.136	855.54
A0A0H2ZXU0	569.321	631.601	759.688	657.706	756.066	774.571	742.001	708.447	658.515	764.337	671.11	741.33	963.719	871.903	955.138	884.448	851.505	964.245	600.461	708.697	765.319	725.224	711.426	706.22	917.811	919.793	907.875
A0A0H2ZXU1	598.388	467.211	655.966	640.284	782.824	809.176	909.06	716.288	747.544	785.146	803.551	709.013	807.644	667.032	895.635	632.531	746.953	1697.65	532.8	648.125	796	812.674	766.345	756.282	737.338	764.083	1222.3
A0A0H2ZXU2	964.1	961.926	860.407	831.349	717.665	679.652	792.891	745.502	798.082	786.461	814.286	753.321	687.825	729.252	726.973	709.893	690.524	925.541	963.013	845.878	698.659	769.196	792.272	783.804	708.539	718.433	808.032
A0A0H2ZXU3	700.58	748.377	598.58	735.333	705.645	795.017	586.415	793.135	678.337	601.299	833.583	811.745	958.379	730.073	891.411	836.979	901.959	996.254	724.479	666.956	750.331	689.775	639.818	822.664	844.226	864.195	949.106
A0A0H2ZXU4	577.304	924.413	448.714	773.019	464.48	677.674	426.951	846.269	584.657	498.893	750.432	538.443	1145.65	946.208	1150.33	1186.43	1162.14	474.25	750.859	610.867	571.077	636.61	541.775	644.438	1045.93	1168.38	818.197
A0A0H2ZXU5	656.75	1187.6	571.766	1107.27	869.601	827.811	679.53	895.568	713.817	663.831	890.358	910.42	811.388	700.061	769.657	635.326	913.601	264.052	922.177	839.519	848.706	787.549	688.824	900.389	755.724	702.491	588.827
A0A0H2ZXU6	703.274	716.551	685.741	829.011	650.06	741.618	593.564	796.946	684.362	724.748	741.185	797.179	958.605	865.285	923.539	870.971	939.701	673.609	709.912	757.376	695.839	695.255	704.555	769.182	911.945	897.255	806.655
A0A0H2ZXU7	667.762	592.72	1079.21	917.444	399.114	420.774	910.93	711.509	763.279	827.117	826.722	866.126	861.033	741.442	870.671	773.092	645.668	1204	630.241	998.327	409.944	811.219	795.198	846.424	801.237	821.882	924.832
A0A0H2ZXU9	731.243	781.666	617.957	642.463	855.342	899.035	859.951	776.353	876.602	872.661	810.047	896.007	738.834	837.057	724.977	739.67	753.264	656.638	756.455	630.21	877.188	818.152	874.632	853.027	787.946	732.324	704.951
A0A0H2ZXV0	309.244	498.622	755.907	1069.02	1030.54	874.614	673.653	964.282	940.398	928.594	772.335	976.232	638.804	760.336	849.845	619.043	936.814	473.572	403.933	912.461	952.578	818.967	934.496	874.283	699.57	734.444	705.193
A0A0H2ZXV1	795.34	699.503	742.013	577.704	797.673	805.467	914.819	859.526	898.639	918.726	884.748	901.703	628.731	816.54	684.25	745.088	675.076	775.386	747.421	659.859	801.57	887.172	908.682	893.225	722.635	714.669	725.231
A0A0H2ZXV3	1310.92	862.1	1197.01	1691.88	243.97	382.77	906.307	987.038	882.193	899.434	632.719	661.812	882.978	616.801	805.12	571.29	352.605	535.715	1086.51	1444.44	313.37	946.673	890.813	647.266	749.889	688.205	444.16
A0A0H2ZXV4	856.291	627.941	1252.91	1109.39	435.858	488.815	539.014	630.528	621.068	514.917	714.143	531.749	973.738	915.12	828.607	924.397	804.766	1180.76	742.116	1181.15	462.336	584.771	567.993	622.946	944.429	876.502	992.765
A0A0H2ZXV6	520.938	547.395	505.847	459.707	559.707	490.789	449.906	544.085	487.103	413.919	727.316	473.054	1134.81	830.879	1210.36	1885.61	1137.03	905.033	534.167	482.777	525.248	496.995	450.511	600.185	982.847	1547.98	1021.03
A0A0H2ZXV7	816.277	1046.85	1460.97	1264.83	674.292	798.368	768.305	874.71	686.944	825.65	951.994	779.631	478.758	565.049	683.131	628.509	641.588	440.699	931.562	1362.9	736.33	821.507	756.297	865.813	521.904	655.82	541.143
A0A0H2ZXV9	558.481	420.485	638.963	567.986	675.633	674.427	817.311	525.892	774.468	604.013	689.226	611.168	945.305	1116.16	895.729	978.835	900.652	1353.33	489.483	603.474	675.03	671.601	689.24	650.197	1030.73	937.282	1126.99
A0A0H2ZXW1	529.318	607.943	878.528	766.834	621.523	859.515	673.693	716.931	587.838	846.598	616.083	813.441	1002.99	681.144	1003.22	603.779	995.592	1263.61	568.631	822.681	740.519	695.312	717.218	714.762	842.067	803.499	1129.6
A0A0H2ZXW2	348.229	609.493	692.449	743.06	687.688	951.367	561.404	742.2	507.936	645.084	473.926	722.39	1140.41	963.578	1136.9	866.305	1248.37	742.992	478.861	717.754	819.527	651.802	576.51	598.158	1052	1001.6	995.682
A0A0H2ZXW4	1140.03	716.148	720.241	797.34	886.269	734.505	599.24	751.151	674.465	536.372	884.101	569.022	693.568	662.437	628.729	805.65	786.347	1478.43	928.087	758.79	810.387	675.195	605.418	726.562	678.003	717.189	1132.39
A0A0H2ZXW5	702.799	717.671	910.59	903.79	810.966	686.844	794.37	738.044	700.717	710.088	736.985	726.334	861.206	791.836	785.294	868.152	713.911	879.753	710.235	907.19	748.905	766.207	705.403	731.66	826.521	826.723	796.832
A0A0H2ZXW6	683.651	557.722	536.936	435.421	981.402	694.482	1250.14	973.763	1068.93	1027.07	1099.71	959.068	497.187	741.316	492.214	738.238	428.621	989.347	620.687	486.178	837.942	1111.95	1048	1029.39	619.252	615.226	708.984
A0A0H2ZXW7	781.041	573.733	653.315	618.908	1008.18	822.873	890.599	679.487	898.952	745.187	811.878	703.859	642.371	674.29	650.463	716.965	685.917	1559.21	677.387	636.112	915.525	785.043	822.07	757.869	658.33	683.714	1122.57
A0A0H2ZXW8	1178.44	749.607	1082.25	1147.93	738.554	624.226	887.37	676.23	848.796	780.427	732.668	639.328	558.899	650.457	580.06	671.804	589.126	1188.56	964.025	1115.09	681.39	781.8	814.612	685.998	604.678	625.932	888.844
A0A0H2ZXW9	1510.43	1252.64	1293.03	1047.78	944.727	826.882	683.787	674.359	667.568	727.752	587.662	639.944	518.463	574.723	556.983	571.897	555.798	915.147	1381.53	1170.4	885.805	679.073	697.66	613.803	546.593	564.44	735.473
A0A0H2ZXX2	1190.1	1136.41	713.551	947.173	537.407	819.427	525.692	875.049	585.889	575.138	634.299	611.182	1049.96	621.094	879.419	746.928	850.614	807.273	1163.26	830.362	678.417	700.37	580.514	622.741	835.528	813.173	828.943
A0A0H2ZXX3	478.334	452.815	493.521	503.701	748.578	759.584	979.396	873.037	1110.26	1010.5	990.261	1039.48	720.885	663.771	676.264	655.406	692.086	1195.82	465.574	498.611	754.081	926.217	1060.38	1014.87	692.328	665.835	943.954
A0A0H2ZXX4	679.045	675.816	858.631	863.019	824.262	860.757	705.96	698.57	655.274	725.928	666.242	815.436	872.662	759.041	846.437	756.438	869.003	925.332	677.43	860.825	842.509	702.265	690.601	740.839	815.852	801.438	897.168
A0A0H2ZXX5	371.687	643.528	684.147	690.883	706.005	798.272	843.026	956.537	783.268	903.123	743.33	985.694	957.429	1008.84	887.506	695.863	895.315	398.218	507.607	687.515	752.138	899.782	843.196	864.512	983.133	791.684	646.767
A0A0H2ZXX6	923.962	671.765	574.754	645.391	1164.81	818.554	844.098	706.434	959.327	697.276	873.659	687.302	594.405	814.992	582.426	1064.97	535.833	834.591	797.864	610.072	991.68	775.266	828.301	780.481	704.698	823.7	685.212
A0A0H2ZXX7	751.368	678.014	811.49	771.172	890.257	835.609	839.589	741.148	813.434	800.154	775.534	766.983	717.365	718.473	707.522	747.565	720.296	1039.33	714.691	791.331	862.933	790.369	806.794	771.259	717.919	727.543	879.812
A0A0H2ZXX8	460.465	345.561	506.315	463.579	858.609	776.938	1122.9	923.193	992.65	944.207	1087.98	866.889	583.536	711.875	660.084	656.851	652.548	1436.45	403.013	484.947	817.774	1023.04	968.428	977.432	647.706	658.468	1044.5
A0A0H2ZXX9	569.544	572.021	554.191	393.034	998.525	850.631	693.495	610.032	703.38	662.758	615.577	652.509	944.536	961.694	889.198	951.036	928.159	1276.77	570.782	473.613	924.578	651.763	683.069	634.043	953.115	920.117	1102.47
A0A0H2ZXY1	462.184	407.301	464.662	638.23	585.963	577.494	475.898	505.488	532.77	464.687	555.93	472.906	1284.38	1194.52	1149.88	1134.44	1209.15	1355.9	434.742	551.446	581.729	490.693	498.728	514.418	1239.45	1142.16	1282.53
A0A0H2ZXY2	433.053	438.024	536.432	494.033	799.344	772.653	784.222	740.469	815.995	918.541	741.398	877.24	949.611	1076.47	940.141	973.26	855.173	635.553	435.539	515.232	785.998	762.346	867.268	809.319	1013.04	956.7	745.363
A0A0H2ZXY3	1054.18	1074.22	1005.96	1019.69	767.06	750.432	754.836	755.674	712.345	795.779	655.203	800.917	704.607	679.191	732.662	688.999	729.486	597.337	1064.2	1012.83	758.746	755.255	754.062	728.06	691.899	710.831	663.412
A0A0H2ZXY4	1203.32	931.129	790.174	789.43	791.229	754.12	1078.56	822.826	806.073	742.633	834.333	645.342	525.643	520.828	538.23	594.878	588.345	1406.72	1067.22	789.802	772.674	950.694	774.353	739.837	523.235	566.554	997.531
A0A0H2ZXY5	729.827	714.891	796.703	770.696	604.115	633.833	862.467	827.217	870.206	844.234	845.932	850.218	774.143	764.709	769.947	825.354	726.461	830.677	722.359	783.699	618.974	844.842	857.22	848.075	769.426	797.65	778.569
A0A0H2ZXY7	692.346	265.531	733.787	327.17	455.281	194.485	862.254	567.246	966.554	1301.2	819.732	993.934	1010.41	715.045	510.321	1587.47	857.297	800.162	478.939	530.479	324.883	714.75	1133.88	906.833	862.73	1048.89	828.729
A0A0H2ZXY8	673.82	598.391	827.013	869.768	653.899	589.693	975.499	897.575	1061.97	1175.72	929.589	1142.51	648.115	603.319	648.375	646.674	599.79	676.432	636.106	848.39	621.796	936.537	1118.84	1036.05	625.717	647.524	638.111
A0A0H2ZXY9	517.563	1011.06	1686.14	1416.1	469.924	908.426	371.488	942.483	400.617	1033.38	500.109	1043.14	715.294	614.889	1117.56	267.999	1262.59	151.596	764.311	1551.12	689.175	656.986	716.999	771.624	665.092	692.781	707.091
A0A0H2ZXZ1	1383.55	1717.16	1872.38	2907.8	580.075	605.955	896.782	319.941	1121.4	274.226	854.572	719.795	233.419	274.523	253.468	346.423	263.601	198.632	1550.36	2390.09	593.015	608.362	697.815	787.184	253.971	299.945	231.116
A0A0H2ZXZ2	1572.98	1504.55	1259.42	846.177	700.344	749.533	804.916	855.72	744.47	889.056	757.791	827.056	461.029	530.465	511.227	649.553	494.416	407.305	1538.77	1052.8	724.939	830.318	816.763	792.423	495.747	580.39	450.86
A0A0H2ZXZ4	1296.31	471.344	464.181	338.165	607.824	370.142	443.37	520.37	1121.79	551.866	1187.59	506.18	660.515	839.888	476.398	2162.31	654.532	683.911	883.825	401.173	488.983	481.87	836.83	846.883	750.202	1319.36	669.222
A0A0H2ZXZ5	2669.08	2129.36	1365.32	888.351	571.395	652.981	578.322	634.472	545.511	622.165	512.199	619.691	417.053	655.033	442.24	640.068	422.163	392.394	2399.22	1126.83	612.188	606.397	583.838	565.945	536.043	541.154	407.278
A0A0H2ZXZ6	747.252	1000.68	4552.01	5196.46	343.984	142.587	806.072	144.285	345.541	154.62	329.867	121.455	252.645	174.109	302.769	120.141	303.972	319.313	873.968	4874.24	243.285	475.179	250.08	225.661	213.377	211.455	311.643
A0A0H2ZXZ7	560.92	659.184	695.693	576.616	972.734	805.404	853.512	738.73	917.685	775.462	894.606	815.604	713.895	719.257	662.908	684.955	692.613	1337.41	610.052	636.154	889.069	796.121	846.574	855.105	716.576	673.932	1015.01
A0A0H2ZXZ9	850.24	692.227	1039.04	923.481	732.824	673.377	865.666	689.079	780.049	739.305	741.38	691.063	714.745	622.929	711.834	649.214	661.794	1454.3	771.233	981.261	703.101	777.372	759.677	716.222	668.837	680.524	1058.04
A0A0H2ZY01	1432.25	1199.46	1164.74	1213.1	1127.49	1116.99	421.654	443.584	491.992	470.482	337.826	367.174	771.139	756.058	738.812	666.112	750.705	892.876	1315.86	1188.92	1122.24	432.619	481.237	352.5	763.599	702.462	821.791
A0A0H2ZY04	648.287	740.45	728.694	764.516	831.774	894.771	685.947	877.223	745.909	885.023	753.652	805.501	825.33	834.703	826.599	782.127	884.986	505.623	694.369	746.605	863.273	781.585	815.466	779.576	830.016	804.363	695.304
A0A0H2ZY05	583.288	718.372	874.79	901.505	720.051	848.766	728.369	821.034	637.88	687.608	719.049	753.374	863.252	916.995	915.75	870.486	904.126	492.236	650.83	888.147	784.409	774.701	662.744	736.211	890.123	893.118	698.181
A0A0H2ZY06	505.313	596.615	642.099	747.796	613.935	749.628	498.221	634.544	552.354	616.81	580.527	658.944	1246.75	1038.32	1085.47	878.448	1068.68	1018.01	550.964	694.948	681.782	566.383	584.582	619.736	1142.53	981.958	1043.34
A0A0H2ZY07	775.853	725.392	767.395	764.24	842.565	759.709	765.948	747.736	837.777	805.261	777.554	759.676	751.292	785.534	724.07	728.991	754.93	1014	750.623	765.817	801.137	756.842	821.519	768.615	768.413	726.53	884.464
A0A0H2ZY08	676.508	764.024	699.438	648.594	756.513	690.223	739.276	802.369	790.502	778.897	775.419	761.35	843.743	935.446	835.546	938.602	817.587	659.255	720.266	674.016	723.368	770.823	784.699	768.384	889.595	887.074	738.421
A0A0H2ZY09	1184.04	891.974	914.2	855.992	775.071	665.904	915.087	772.203	829.4	802.591	731.913	757.007	687.457	734.771	602.286	868.008	522.148	712.124	1038.01	885.096	720.487	843.645	815.995	744.46	711.114	735.147	617.136
A0A0H2ZY10	671.16	714.401	442.849	294.614	402.141	452.834	819.982	1146.75	986.062	1242.17	870.615	1297.75	909.538	688.354	879.145	603.847	849.761	775.093	692.78	368.732	427.488	983.368	1114.12	1084.18	798.946	741.496	812.427
A0A0H2ZY11	920.147	790.397	1345.2	674.194	869.491	796.509	896.015	804.667	688.194	681.677	627.842	643.497	592.022	472.142	706.235	741.975	589.771	1539.77	855.272	1009.7	833	850.341	684.936	635.67	532.082	724.105	1064.77
A0A0H2ZY12	384.021	64.3067	359.276	5.99489	356.037	6.33434	470.841	337.152	370.648	156.192	538.044	194.968	1847.61	2497.54	1469.59	1962.02	852.76	813.142	224.164	182.636	181.186	403.996	263.42	366.506	2172.58	1715.8	832.951
A0A0H2ZY14	776.54	1233.72	1296.58	1271.57	397.176	564.832	590.161	858.945	669.997	655.625	601.044	705.878	1113.46	718.048	972.748	802.385	633.868	294.74	1005.13	1284.07	481.004	724.553	662.811	653.461	915.754	887.566	464.304
A0A0H2ZY15	1217.46	1418.8	866.194	1215.36	662.891	681.444	466.82	810.701	625.235	577.396	747.535	711.949	873.406	654.345	729.798	771.196	825.218	300.991	1318.13	1040.78	672.168	638.76	601.316	729.742	763.875	750.497	563.105
A0A0H2ZY16	1226.79	783.043	1138.23	1040.87	619.99	573.828	883.124	695.435	797.237	745.828	672.356	612.524	635.852	623.926	618.336	651.282	611.12	1408.98	1004.92	1089.55	596.909	789.28	771.532	642.44	629.889	634.809	1010.05
A0A0H2ZY19	387.115	646.576	823.163	658.408	963.147	955.373	894.524	908.613	845.96	1026.98	795.495	1037.14	704.911	843.891	737.949	552.865	815.427	561.419	516.845	740.786	959.26	901.568	936.471	916.32	774.401	645.407	688.423
A0A0H2ZY21	1266.26	1125.37	1284.55	1155.46	670.847	666.706	849.894	839.413	824.953	980.212	650.074	861.373	574.366	536.508	549.818	541.405	585.53	568.704	1195.82	1220	668.776	844.654	902.583	755.724	555.437	545.611	577.117
A0A0H2ZY22	498.061	504.839	716.182	626.489	920.671	888.482	970.438	840.551	859.511	950.369	816.365	908.466	739.825	694.157	744.228	669.483	711.725	1062.9	501.45	671.335	904.576	905.494	904.94	862.415	716.991	706.855	887.311
A0A0H2ZY23	964.798	1144.07	478.151	392.805	732.278	716.555	554.318	1061.32	814.368	309.506	860.793	527.484	821.608	912.915	833.779	1496.98	831.962	203.877	1054.43	435.478	724.417	807.819	561.937	694.139	867.261	1165.38	517.92
A0A0H2ZY25	814.277	831.996	610.126	591.248	949.632	810.649	899.98	974.357	962.649	1030.98	844.103	820.657	700.802	761.962	615.397	710.543	616.398	620.89	823.136	600.687	880.141	937.168	996.814	832.38	731.382	662.97	618.644
A0A0H2ZY28	1140.54	1120.71	783.356	728.936	902.995	806.247	585.392	655.266	676.617	729.597	618.484	598.269	814.89	810.69	778.444	742.471	757.01	905.697	1130.62	756.146	854.621	620.329	703.107	608.377	812.79	760.457	831.354
A0A0H2ZY29	609.317	527.777	701.523	557.76	772.788	561.45	878.336	672.905	824.538	749.01	804.606	674.375	778.708	698.348	821.016	711.35	764.805	1914.18	568.547	629.642	667.119	775.62	786.774	739.49	738.528	766.183	1339.49
A0A0H2ZY30	495.743	590.305	567.811	679.255	724.253	718.939	713.21	724.129	767.674	739.339	727.04	809.641	931.717	849.992	935.202	963.642	980.218	891.938	543.024	623.533	721.596	718.67	753.506	768.341	890.854	949.422	936.078
A0A0H2ZY31	942.463	551.086	568.196	480.566	759.148	639.82	966.153	743.567	831.109	790.028	872.545	742.796	744.991	689.131	697.666	789.64	624.613	1630.86	746.774	524.381	699.484	854.86	810.568	807.671	717.061	743.653	1127.74
A0A0H2ZY32	680.447	631.924	885.761	709.964	878.781	804.347	817.082	725.964	826.899	766.148	762.153	718.062	668.652	730.988	733.011	713.023	774.419	1294.66	656.185	797.863	841.564	771.523	796.523	740.107	699.82	723.017	1034.54
A0A0H2ZY33	599.805	627.18	665.176	629.025	792.789	750.215	759.859	721.747	776.628	745.436	772.964	688.929	830.923	836.037	861.132	850.453	857.095	1164.24	613.492	647.101	771.502	740.803	761.032	730.947	833.48	855.792	1010.67
A0A0H2ZY35	529.271	464.676	587.793	618.807	844.957	704.97	595.033	700.116	660.25	710.259	698.075	763.282	1093.6	736.095	848.847	683.566	975.414	1693.52	496.973	603.3	774.963	647.575	685.254	730.679	914.846	766.206	1334.47
A0A0H2ZY36	1035	869.15	688.199	609.038	781.477	818.495	1085.36	905.947	889.731	930.548	1043.65	937.532	534.477	749.755	530.998	736.01	495.453	581.974	952.076	648.618	799.986	995.656	910.139	990.588	642.116	633.504	538.714
A0A0H2ZY38	823.831	1119.29	1831.66	2116.48	423.04	439.023	846.376	861.678	887.12	586.894	596.751	586.522	684.968	512.437	809.461	563.416	398.234	436.792	971.56	1974.07	431.032	854.027	737.007	591.636	598.703	686.439	417.513
A0A0H2ZY39	1214.03	1355.29	1170.69	1135.98	815.409	875.271	534.107	656.105	612.629	683.852	619.453	647.518	711.757	661.898	746.347	631.511	731.447	551.411	1284.66	1153.34	845.34	595.106	648.24	633.485	686.827	688.929	641.429
A0A0H2ZY41	659.816	449.843	608.928	440.961	717.075	615.388	797.791	602.51	760.237	678.154	770.246	683.817	961.049	699.39	857.321	903.741	777.092	1905.2	554.829	524.945	666.232	700.15	719.195	727.031	830.22	880.531	1341.15
A0A0H2ZY43	698.386	633.689	653.382	725.584	854.358	854.279	830.89	798.974	862.536	833.548	803.976	804.228	763.755	798.873	733.877	789.345	761.903	832.805	666.038	689.483	854.318	814.932	848.042	804.102	781.314	761.611	797.354
A0A0H2ZY44	600.598	521.918	538.419	749.162	746.481	678.109	844.959	780.228	939.645	884.996	845.211	783.397	820.012	839.937	754.04	835.346	805.708	954.916	561.258	643.79	712.295	812.594	912.321	814.304	829.975	794.693	880.312
A0A0H2ZY45	888.164	840.833	883.208	817.22	704.762	775.677	730.836	802.857	792.881	774.938	827.626	742.133	732.913	659.339	738.946	638.164	723.678	1111.05	864.498	850.214	740.22	766.847	783.909	784.88	696.126	688.555	917.362
A0A0H2ZY47	859.678	972.919	758.332	851.582	802.113	739.051	847.551	839.071	894.911	843.978	842.36	761.175	692.849	662.09	709.504	719.769	625.136	761.866	916.298	804.957	770.582	843.311	869.444	801.768	677.47	714.637	693.501
A0A0H2ZY48	1079.83	1363.56	1322.23	1110.73	745.714	803.551	570.924	693.575	601.397	601.34	584.925	546.058	754.933	712.945	763.33	759.687	741.879	534.918	1221.7	1216.48	774.633	632.25	601.369	565.492	733.939	761.508	638.399
A0A0H2ZY49	464.055	614.124	634.777	541.03	978.281	883.855	781.837	776.133	822.798	860.731	803.54	755.738	721.367	960.798	879.399	782.284	831.359	862.368	539.089	587.904	931.068	778.985	841.764	779.639	841.083	830.842	846.863
A0A0H2ZY50	820.52	570.892	673.27	485.506	840.819	617.487	753.463	766.887	866.201	842.763	899.604	848.176	722.986	893.262	707.297	1011.37	690.9	907.177	695.706	579.388	729.153	760.175	854.482	873.89	808.124	859.335	799.038
A0A0H2ZY52	815.018	904.785	1065.02	1105.14	699.476	528.78	982.488	894.571	903.155	1125.92	793.833	819.489	639.23	665.585	709.39	531.604	523.753	664.558	859.902	1085.08	614.128	938.53	1014.54	806.661	652.407	620.497	594.155
A0A0H2ZY54	1588.35	1474.93	922.948	1305.5	748.515	767.721	651.632	773.881	737.9	477.987	775.264	707.873	633.252	450.422	522.252	633.984	599.485	642.375	1531.64	1114.22	758.118	712.757	607.943	741.569	541.837	578.118	620.93
A0A0H2ZY55	829.176	704.178	612.647	595.045	1029.28	857.189	892.214	746.684	900.321	761.966	850.169	758.832	653.665	797.914	654.184	822.727	605.888	1006	766.677	603.846	943.234	819.449	831.144	804.501	725.79	738.456	805.945
A0A0H2ZY56	423.757	509.446	1268.37	1870.47	652.543	680.929	569.986	836.831	518.293	1194.9	477.885	945.12	1460.29	495.75	827.906	420.83	768.216	360.83	466.601	1569.42	666.736	703.408	856.597	711.502	978.02	624.368	564.523
A0A0H2ZY59	812.727	811.242	840.559	778.085	797.304	776.484	808.297	776.716	813.18	782.578	783.976	774.642	737.464	720.606	712.856	733.801	720.871	956.873	811.984	809.322	786.894	792.506	797.879	779.309	729.035	723.328	838.872
A0A0H2ZY60	750.483	624.697	488.538	455.684	910.171	669.702	926.843	645.981	1015.11	698.654	970.743	591.255	635.033	802.99	615.887	1203.45	646.852	1175.9	687.59	472.111	789.936	786.412	856.882	780.999	719.012	909.668	911.374
A0A0H2ZY61	973.277	955.419	1094.14	1030.89	868.847	911.045	613.679	922.445	616.705	860.704	717.197	636.252	723.974	722.93	499.384	635.204	960.708	512.335	964.348	1062.52	889.946	768.062	738.704	676.724	723.452	567.294	736.521
A0A0H2ZY63	358.296	712.862	342.884	688.206	595.665	780.139	516.621	962.956	670.523	697.148	738.426	929.676	1180.14	861.141	1091.3	866.967	1177.64	530.501	535.579	515.545	687.902	739.789	683.836	834.051	1020.64	979.131	854.07
A0A0H2ZY64	602.261	577.665	769.002	627.888	709.824	639.584	797.438	625.546	756.207	753.108	777.712	717.511	825.483	763.87	837.033	742.876	862.303	1603.46	589.963	698.445	674.704	711.492	754.657	747.611	794.677	789.955	1232.88
A0A0H2ZY65	928.384	815.401	747.141	772.548	919.687	908.57	795.436	796.271	781.63	740.711	776.136	746.37	691.635	723.615	681.974	798.35	719.417	790.151	871.893	759.844	914.129	795.853	761.17	761.253	707.625	740.162	754.784
A0A0H2ZY67	756.354	604.496	710.475	781.279	807.73	758.71	782.61	687.994	732.054	762.662	745.249	705.796	821.849	935.467	797.769	914.777	814.701	819.092	680.425	745.877	783.22	735.302	747.358	725.522	878.658	856.273	816.897
A0A0H2ZY70	2170.04	2190.56	1251.78	1136.76	441.593	411.838	683.41	600.093	825.912	688.84	793.173	676.499	515.09	534.803	470.75	557.775	237.538	492.519	2180.3	1194.27	426.715	641.751	757.376	734.836	524.946	514.263	365.029
A0A0H2ZY71	523.997	889.231	394.916	922.391	634.742	587.123	445.609	800.088	616.96	550.179	744.079	630.547	1211.71	796.95	1035.13	1141.34	1102.77	594.467	706.614	658.654	610.933	622.849	583.57	687.313	1004.33	1088.24	848.62
A0A0H2ZY72	805.9	985.875	1154.3	1551.15	663.001	758.625	669.613	736.651	738.479	670.753	679.04	749.932	772.676	621.945	756.872	631.534	821.925	474.941	895.888	1352.72	710.813	703.132	704.616	714.486	697.31	694.203	648.433
A0A0H2ZY73	1244.44	1560.76	1444.53	665.718	735.762	607.046	458.089	449.814	497.892	621.538	509.609	619.69	932.485	634.59	536.617	1378.04	824.614	361.834	1402.6	1055.12	671.404	453.952	559.715	564.65	783.538	957.328	593.224
A0A0H2ZY74	1100.85	1286.17	1139.08	887.601	565.702	618.657	693.876	663.768	670.55	677.893	642.204	656.421	807.249	759.394	805.595	716.817	696.483	851.751	1193.51	1013.34	592.18	678.822	674.222	649.313	783.321	761.206	774.117
A0A0H2ZY75	653.756	724.433	801.172	819.901	868.794	837.289	783.695	816.523	790.522	909.55	717.666	861.761	773.143	747.048	788.339	672.893	810.787	755.254	689.094	810.537	853.041	800.109	850.036	789.714	760.096	730.616	783.021
A0A0H2ZY76	644.541	735.943	768.489	662.722	989.853	938.498	849.096	844.792	885.124	801.819	905.229	834.956	630.758	793.532	677.395	770.989	657.476	709.884	690.242	715.606	964.176	846.944	843.471	870.093	712.145	724.192	683.68
A0A0H2ZY78	482.313	668.073	491.087	666.27	910.666	904.064	607.706	804.005	736.453	706.535	765.009	763.283	974.923	986.075	854.553	894.979	989.949	590.182	575.193	578.679	907.365	705.855	721.494	764.146	980.499	874.766	790.066
A0A0H2ZY79	953.319	574.461	787.079	433.098	697.571	795.334	668.113	528.515	544.548	784.816	401.691	727.044	1037.43	881.635	1032.5	653.314	887.705	1686.28	763.89	610.089	746.452	598.314	664.682	564.367	959.534	842.905	1286.99
A0A0H2ZY80	439.097	436.196	426.818	373.586	471	460.716	1006.63	994.19	1039.62	1039.44	1043.75	1083.99	891.264	679.038	835.206	654.284	668.705	1417.3	437.646	400.202	465.858	1000.41	1039.53	1063.87	785.151	744.745	1043
A0A0H2ZY82	971.175	959.399	960.035	720.659	366.708	398.21	503.086	397.078	404.564	528.044	386.797	499.712	1243.22	1087.45	1174.79	915.516	956.14	1385.24	965.287	840.347	382.459	450.082	466.304	443.255	1165.33	1045.15	1170.69
A0A0H2ZY83	1336.36	760.444	1363.82	758.091	712.72	825.487	526.453	552.032	505.667	571.004	492.693	566.687	699.735	685.694	734.283	604.837	843.052	1796.37	1048.4	1060.95	769.103	539.243	538.335	529.69	692.714	669.56	1319.71
A0A0H2ZY85	844.505	566.173	535.715	459.818	733.744	635.884	848.298	814.971	845.026	971.741	887.09	935.761	701.768	754.28	773.222	750.781	775.834	1199.71	705.339	497.767	684.814	831.634	908.384	911.425	728.024	762.001	987.772
A0A0H2ZY86	526.564	651.014	734.154	628.732	1103.89	968.861	797.833	775.511	842.102	900.425	744.795	904.621	730.302	729.036	721.38	736.041	778.817	828.105	588.789	681.443	1036.37	786.672	871.264	824.708	729.669	728.711	803.461
A0A0H2ZY89	488.627	676.843	335.549	587.161	486.527	740.278	372.203	761.227	448.614	503.341	632.652	687.318	1333.39	1037.3	1258.94	1132.93	1286.93	718.936	582.735	461.355	613.403	566.715	475.978	659.985	1185.34	1195.94	1002.93
A0A0H2ZY90	523.251	645.594	704.291	711.197	664.382	720.546	861.834	842.823	884.297	855.237	886.745	787.488	713.727	858.655	850.705	759.18	826.666	885.179	584.422	707.744	692.464	852.328	869.767	837.117	786.191	804.942	855.922
A0A0H2ZY91	947.363	790.315	718.042	738.867	805.261	857.893	775.283	752.888	835.737	780.481	783.267	760.247	701.693	786.424	658.193	781.622	788.973	831.888	868.839	728.455	831.577	764.085	808.109	771.757	744.059	719.907	810.431
A0A0H2ZY92	644.834	703.79	639.331	730.878	978.914	894.573	854.329	828.974	880.147	824.682	818.017	891.544	746.277	761.986	702.879	756.943	707.966	710.116	674.312	685.104	936.743	841.651	852.414	854.78	754.132	729.911	709.041
A0A0H2ZY93	969.194	346.058	763.908	701.236	966.539	899.369	636.839	463.713	650.207	484.74	542.151	444.654	848.978	612.157	824.318	1015.12	832.832	1967.75	657.626	732.572	932.954	550.276	567.473	493.402	730.567	919.72	1400.29
A0A0H2ZY95	1150.49	1234.8	1365.94	1849.65	473.644	290.08	1302.11	736.078	780.032	723.216	432.584	382.082	586.796	673.494	598.748	558.167	638.266	738.702	1192.64	1607.79	381.862	1019.09	751.624	407.333	630.145	578.457	688.484
A0A0H2ZY96	933.807	712.135	815.318	721.979	814.496	830.89	768.779	851.296	766.945	882.841	807.251	877	719.504	743.893	715.815	784.473	697.216	696.166	822.971	768.648	822.693	810.037	824.893	842.125	731.699	750.144	696.691
A0A0H2ZY97	755.678	647.03	655.884	728.978	769.864	770.955	667.137	749.95	762.084	797.868	826.691	807.473	828.934	919.571	796.817	838.342	854.403	756.035	701.354	692.431	770.41	708.544	779.976	817.082	874.252	817.579	805.219
A0A0H2ZY99	533.907	566.624	585.308	670.019	933.846	888.503	896.32	830.509	827.394	885.082	807.712	849.936	766.777	782.178	794.771	764.27	785.949	851.676	550.266	627.663	911.174	863.414	856.238	828.824	774.478	779.52	818.813
A0A0H2ZYA0	603.358	911.614	583.821	996.499	427.574	513.83	574.49	771.782	652.7	646.061	758.544	793.705	1057.5	917.132	950.824	972.516	1164.43	437.737	757.486	790.16	470.702	673.136	649.38	776.124	987.317	961.67	801.086
[truncated: 1,953 more rows]

## Sheet: Aerobic Amikacin vs no drug
ProteinID	Description	Aerobic M. avium at 24h no drug	Aerobic M. avium at 24h exposed to amikacin 4mg/ml	FC	F-test	p-value	logFC	Significance	Pi
[truncated: 3,714 more rows]

## Sheet: Aerobic Clarithro vs no drug
ProteinID	Description	Aerobic M. avium at 24h no drug	Aerobic M. avium at 24h exposed to clarithromycin 16mg/ml	FC	F-test	p-value	logFC	Significance	Pi
[truncated: 3,714 more rows]

[truncated: 6 more sheets: Anaerobic Amikacin vs no drug, Anaerobic Clarithro vs no drug, Biofilm Amikacin vs no drug, Biofilm Clarithro vs no drug, Anaer nodrug vs aer no drug, Biofilm nodrug vs aer nodrug]
